# Supplementary material for: Cationic Pd(II)-catalyzed C–H activation/cross-coupling reactions at room temperature: synthetic and mechanistic studies
Source: PubMed Central journal article supplement (PMC4902085; doi:10.3762/bjoc.12.99), 2016-05-20

# Supporting Information

for

## Cationic Pd(II)-catalyzed C–H activation/cross-coupling reactions at room temperature: synthetic and mechanistic studies

Takashi Nishikata, Alexander R. Abela, Shenlin Huang and Bruce H. Lipshutz\*

Address: Department of Chemistry & Biochemistry, University of California, Santa  
Barbara, CA 93106, USA

Email: lipshutz@chem.ucsb.edu

\* Corresponding author

### Experimental procedures and characterization of all new compounds

|       |                                  |          |
|-------|----------------------------------|----------|
| I.    | Synthesis of arylurea            | S2–S7    |
| II.   | C–H arylations with aryl iodides | S7–S8    |
| III.  | C–H Suzuki–Miyaura               | S8–S15   |
| IV.   | Fujiwara–Moritani                | S15–S22  |
| V.    | Synthesis of boscalid            | S23      |
| VI.   | Mechanistic studies              | S24–S26  |
| VII.  | References                       | S26      |
| VIII. | Spectral data                    | S27–S105 |

## General information

For TLC analyses precoated Kieselgel 60 F<sub>254</sub> plates (Merck, 0.25 mm thick) were used; for column chromatography Silica Flash® P60 (SiliCycle, 40–63 μm) was used. Reactions were monitored using an Hewlett-Packard HP6890 gas chromatograph. <sup>1</sup>H and <sup>13</sup>C NMR spectra were obtained using a Varian UNITY INOVA 400 MHz NMR spectrometer. High resolution mass spectral analyses were obtained using a VG70 double-focusing magnetic sector instrument (VG Analytical) for EI and a PE Sciex QStar Pulsar quadrupole/TOF instrument (API) for ESI. \*Compounds **1a,1b, 1d, 1f, 1j, 1k, 1l, 1n, 3a–3hh, 5a–5c** were previously reported<sup>1-5</sup>.

## I. The synthesis of arylureas

Table 1. Starting materials.

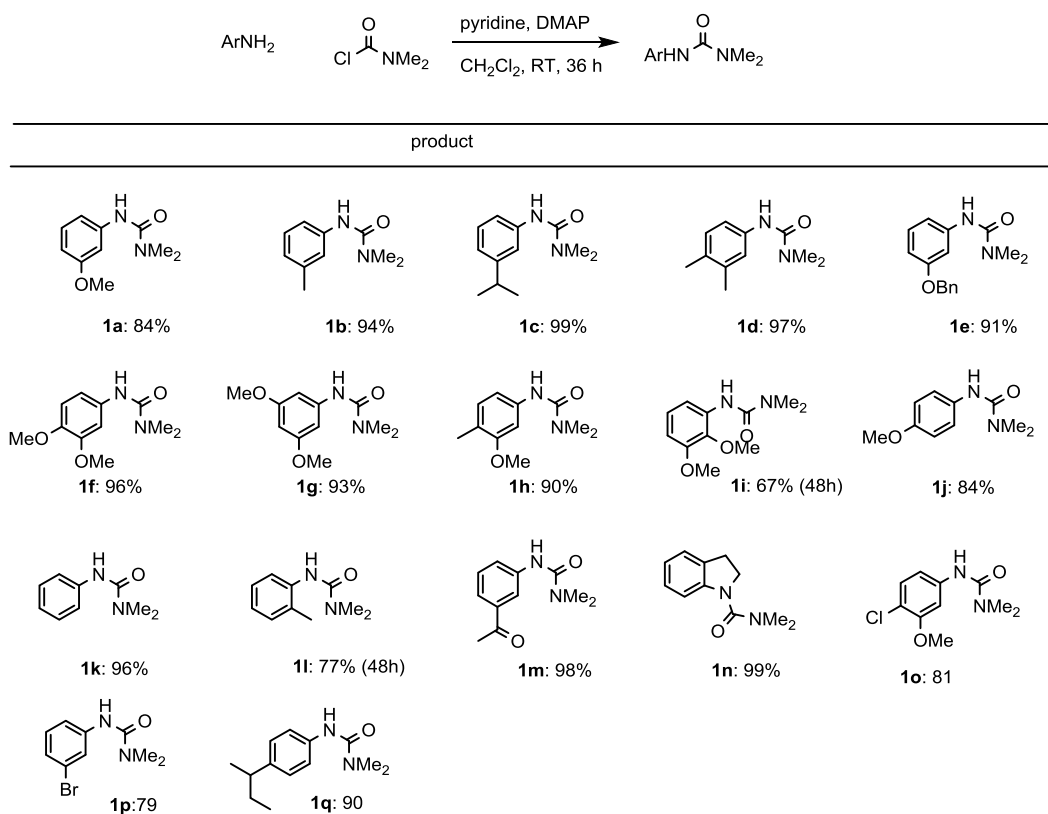

### General procedure A [similar as described in ref. 3].

Anilines (1 mmol), *N,N*-dimethylcarbamoyl chloride (2 mmol), DMAP (1 mmol), and pyridine (4 mmol) were sequentially added under air to a reaction tube equipped with a stir bar and a septum. CH<sub>2</sub>Cl<sub>2</sub> (2 mL) was added by syringe and the resulting mixture vigorously stirred for 36–48 h at ambient temperature. After this time, the contents of the flask were extracted with

EtOAc. The solution obtained was filtered through the plug of silica gel and anhydrous  $\text{MgSO}_4$ , and then concentrated by rotary evaporation. The residue was purified by flash chromatography, eluting with hexane/EtOAc to afford the product.

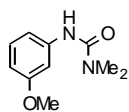

Following the general procedure **A**, using aniline (0.11 mL, 1 mmol), DMAP (122 mg, 1 mmol), pyridine (0.32 mL, 4 mmol), *N,N*-dimethylcarbamoyl chloride (0.18 mL, 2 mmol), and  $\text{CH}_2\text{Cl}_2$  (2 mL), yielded the product **1a** (164 mg, 84%);  $^1\text{H}$  NMR ( $\text{CDCl}_3$ )  $\delta$ : 3.02 (s, 6H), 3.79 (s, 3H), 6.36 (brs, 1H), 6.57 (d,  $J = 8.0$  Hz, 1H), 6.83 (d,  $J = 7.5$  Hz, 1H), 7.14-7.19 (m, 2H);  $^{13}\text{C}$  NMR ( $\text{CDCl}_3$ ),  $\delta$ : 36.66, 55.46, 105.39, 109.22, 111.94, 129.63, 140.72, 155.80, 160.40; HRESIMS calcd. for  $\text{C}_{10}\text{H}_{14}\text{N}_2\text{O}_2\text{Na}$  ( $\text{M}+\text{Na}^+$ ): 217.0953; found 217.0948.

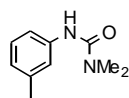

Following the general procedure **A**, using *m*-toluidine (1.07 mL, 10 mmol), DMAP (1.22 g, 10 mmol), pyridine (3.24 mL, 40 mmol), *N,N*-dimethylcarbamoyl chloride (1.84 mL, 20 mmol), and  $\text{CH}_2\text{Cl}_2$  (20 mL), yielded the product **1b** (1.68 g, 94%);  $^1\text{H}$  NMR ( $\text{CDCl}_3$ )  $\delta$ : 2.32 (s, 3H), 3.02 (s, 6H), 6.26 (brs, 1H), 6.83-6.85 (m, 1H), 7.14-7.26 (m, 3H);  $^{13}\text{C}$  NMR ( $\text{CDCl}_3$ ),  $\delta$ : 21.57, 36.50, 117.12, 120.80, 123.76, 128.65, 138.67, 139.33, 156.01; HRESIMS calcd. for  $\text{C}_{10}\text{H}_{14}\text{N}_2\text{ONa}$  ( $\text{M}+\text{Na}^+$ ): 201.1004; found 201.0999.

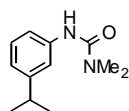

Following the general procedure **A**, using aniline (0.14 mL, 1 mmol), DMAP (122 mg, 1 mmol), pyridine (0.32 mL, 4 mmol), *N,N*-dimethylcarbamoyl chloride (0.18 mL, 2 mmol), and  $\text{CH}_2\text{Cl}_2$  (2 mL), yielded the product **1c** (204 mg, 99%);  $^1\text{H}$  NMR ( $\text{CDCl}_3$ )  $\delta$ : 1.24 (d,  $J = 7.2$  Hz, 6H), 2.87 (sept,  $J = 7.2$  Hz, 1H), 3.04 (s, 6H), 6.26 (brs, 1H), 6.89-6.92 (m, 1H), 7.16-7.26 (m, 2H), 7.29 (s, 1H);  $^{13}\text{C}$  NMR ( $\text{CDCl}_3$ ),  $\delta$ : 24.12, 34.34, 36.64, 117.53, 118.20, 121.28, 128.89, 139.32, 149.93, 155.99; HRESIMS calcd. for  $\text{C}_{12}\text{H}_{18}\text{N}_2\text{ONa}$  ( $\text{M}+\text{Na}^+$ ): 229.1317; found 229.1314.

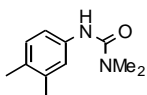

Following the general procedure **A**, using aniline (121 mg, 1 mmol), DMAP (122 mg, 1 mmol), pyridine (0.32 mL, 4 mmol), *N,N*-dimethylcarbamoyl chloride (0.18 mL, 2 mmol), and CH<sub>2</sub>Cl<sub>2</sub> (2 mL), yielded the product **1d** (187 mg, 97%); <sup>1</sup>H NMR (CDCl<sub>3</sub>) δ: 2.20 (s, 3H), 2.23 (s, 3H), 3.02 (s, 6H), 6.18 (brs, 1H), 7.03 (d, *J* = 8.4 Hz, 1H), 7.07 (dd, *J* = 2.0 and 8.4 Hz, 1H), 7.20 (d, *J* = 1.6 Hz, 1H); <sup>13</sup>C NMR (CDCl<sub>3</sub>), δ: 19.24, 20.08, 36.64, 117.65, 121.70, 130.02, 131.40, 137.04, 137.19, 156.12; HRESIMS calcd. for C<sub>11</sub>H<sub>16</sub>N<sub>2</sub>O<sub>2</sub>Na (M+Na<sup>+</sup>): 215.1160; found 215.1157.

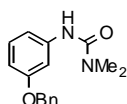

Following the general procedure **A**, using aniline (199 mg, 1 mmol), DMAP (122 mg, 1 mmol), pyridine (0.32 mL, 4 mmol), *N,N*-dimethylcarbamoyl chloride (0.18 mL, 2 mmol), and CH<sub>2</sub>Cl<sub>2</sub> (2 mL), yielded the product **1e** (244 mg, 91%); <sup>1</sup>H NMR (CDCl<sub>3</sub>) δ: 3.04 (s, 6H), 5.06 (s, 2H), 6.29 (brs, 1H), 6.66 (dd, *J* = 2.4 and 8.4 Hz, 1H), 6.84 (d, *J* = 7.2 Hz, 1H), 7.17 (t, *J* = 8.0 Hz, 1H), 7.28-7.44 (m, 6H); <sup>13</sup>C NMR (CDCl<sub>3</sub>), δ: 36.63, 70.10, 106.38, 109.97, 112.27, 127.67, 128.02, 128.68, 129.64, 137.28, 140.73, 155.79, 159.58; HRESIMS calcd. for C<sub>16</sub>H<sub>18</sub>N<sub>2</sub>O<sub>2</sub>Na (M+Na<sup>+</sup>): 293.1266; found 293.1269.

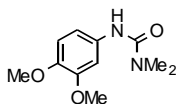

Following the general procedure **A**, using aniline (153 mg, 1 mmol), DMAP (122 mg, 1 mmol), pyridine (0.32 mL, 4 mmol), *N,N*-dimethylcarbamoyl chloride (0.18 mL, 2 mmol), and CH<sub>2</sub>Cl<sub>2</sub> (2 mL), yielded the product **1f** (216 mg, 96%); <sup>1</sup>H NMR (CDCl<sub>3</sub>) δ: 3.03 (s, 6H), 3.85 (s, 3H), 3.88 (s, 3H), 6.20 (brs, 1H), 6.69 (dd, *J* = 2.8 and 8.8 Hz, 1H), 6.78 (d, *J* = 8.8 Hz, 1H), 7.26 (d, *J* = 2.8 Hz, 1H); <sup>13</sup>C NMR (CDCl<sub>3</sub>), δ: 36.54, 55.93, 56.29, 105.67, 111.54, 112.09, 133.11, 145.16, 149.13, 156.28; HRESIMS calcd. for C<sub>11</sub>H<sub>16</sub>N<sub>2</sub>O<sub>3</sub>Na (M+Na<sup>+</sup>): 247.1059; found 247.1057.

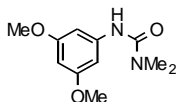

Following the general procedure **A**, using aniline (153 mg, 1 mmol), DMAP (122 mg, 1 mmol), pyridine (0.32 mL, 4 mmol), *N,N*-dimethylcarbamoyl chloride (0.18 mL, 2 mmol), and CH<sub>2</sub>Cl<sub>2</sub> (2 mL), yielded the product **1g** (209 mg, 93%); <sup>1</sup>H NMR (CDCl<sub>3</sub>) δ: 3.02 (s, 6H), 3.76 (s, 6H), 6.16 (s, 1H), 6.31 (brs, 1H), 6.65 (s, 2H); <sup>13</sup>C NMR (CDCl<sub>3</sub>), δ: 36.48, 55.33, 95.51, 97.95, 141.39, 155.81, 160.97; HRESIMS calcd. for C<sub>11</sub>H<sub>16</sub>N<sub>2</sub>O<sub>3</sub>Na (M+Na<sup>+</sup>): 247.1059; found 247.1058.

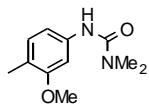

Following the general procedure **A**, using aniline (250 mg, 1.8 mmol), DMAP (1.8 mmol, 223 mg), pyridine (7.3 mmol, 0.6 mL), *N,N*-dimethylcarbamoyl chloride (3.6 mmol, 0.34 mL), and CH<sub>2</sub>Cl<sub>2</sub> (3.6 mL), yielded the product **1h** (344 mg, 90%); <sup>1</sup>H NMR (CDCl<sub>3</sub>) δ: 2.15 (s, 3H), 3.03 (s, 6H), 3.83 (s, 3H), 6.26 (brs, 1H), 6.60 (dd, *J* = 2 and 8 Hz, 1H), 6.99 (d, *J* = 8 Hz, 1H), 7.28 (s, 1H); <sup>13</sup>C NMR (CDCl<sub>3</sub>), δ: 15.68, 36.43, 55.25, 103.17, 111.44, 120.84, 130.15, 138.46, 156.10, 157.84; HRESIMS calcd. for C<sub>11</sub>H<sub>16</sub>N<sub>2</sub>O<sub>2</sub>Na (M+Na<sup>+</sup>): 231.1109; found 231.1107.

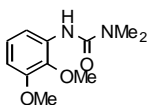

Following the general procedure **A**, using aniline (0.14 mL, 1 mmol), DMAP (122 mg, 1 mmol), pyridine (0.32 mL, 4 mmol), *N,N*-dimethylcarbamoyl chloride (0.18 mL, 2 mmol), and CH<sub>2</sub>Cl<sub>2</sub> (2 mL), yielded the product **1i** (150 mg, 67%); <sup>1</sup>H NMR (CDCl<sub>3</sub>) δ: 3.05 (s, 6H), 3.855 (s, 3H), 3.859 (s, 3H), 6.57 (dd, *J* = 1.2 and 8.4 Hz, 1H), 7.00 (t, *J* = 8.4 Hz, 1H), 7.19 (brs, 1H), 7.81 (dd, *J* = 1.2 and 8.4 Hz, 1H); <sup>13</sup>C NMR (CDCl<sub>3</sub>), δ: 36.21, 55.67, 60.29, 105.74, 111.59, 124.02, 133.52, 136.89, 151.77, 155.25; HRESIMS calcd. for C<sub>11</sub>H<sub>16</sub>N<sub>2</sub>O<sub>3</sub>Na (M+Na<sup>+</sup>): 247.1059; found 247.1057.

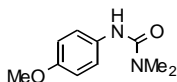

Following the general procedure **A**, using aniline (123 mg, 1 mmol), DMAP (122 mg, 1 mmol), pyridine (0.32 mL, 4 mmol), *N,N*-dimethylcarbamoyl chloride (0.18 mL, 2 mmol), and CH<sub>2</sub>Cl<sub>2</sub> (2 mL), yielded the product **1j** (163 mg, 84%); <sup>1</sup>H NMR (CDCl<sub>3</sub>) δ: 3.01 (s, 6H), 3.78 (s, 3H), 6.19 (brs, 1H), 6.83 (d, *J* = 9.2 Hz, 2H), 7.26 (d, *J* = 9.2 Hz, 2H); <sup>13</sup>C NMR (CDCl<sub>3</sub>), δ: 36.58, 55.67, 114.20, 122.50, 132.44, 155.91, 156.44; HRESIMS calcd. for C<sub>10</sub>H<sub>14</sub>N<sub>2</sub>O<sub>2</sub>Na (M+Na<sup>+</sup>): 217.0953; found 217.0947.

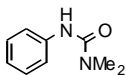

Following the general procedure **A**, using *m*-toluidine (0.91 mL, 10 mmol), DMAP (1.22 g, 10 mmol), pyridine (3.24 mL, 40 mmol), *N,N*-dimethylcarbamoyl chloride (1.84 mL, 20 mmol), and CH<sub>2</sub>Cl<sub>2</sub> (20 mL), yielded the product **1k** (1.46 g, 89%); <sup>1</sup>H NMR (CDCl<sub>3</sub>) δ: 3.03 (s, 6H), 6.32 (brs, 1H), 7.02 (t, *J* = 7.2 Hz, 1H), 7.26-7.31 (m, 2H), 7.35-7.38 (m, 2H); <sup>13</sup>C NMR (CDCl<sub>3</sub>), δ: 36.56, 120.10, 122.99, 128.89, 139.44, 155.97; HRESIMS calcd. for C<sub>9</sub>H<sub>12</sub>N<sub>2</sub>O<sub>2</sub>Na (M+Na<sup>+</sup>): 187.0847; found 187.0839.

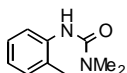

Following the general procedure **A**, using aniline (0.11 mL, 1 mmol), DMAP (122 mg, 1 mmol), pyridine (0.32 mL, 4 mmol), *N,N*-dimethylcarbamoyl chloride (0.18 mL, 2 mmol), and CH<sub>2</sub>Cl<sub>2</sub> (2 mL), yielded the product **1l** (138 mg, 77%); <sup>1</sup>H NMR (CDCl<sub>3</sub>) δ: 2.25 (s, 3H), 3.04 (s, 6H), 6.12 (brs, 1H), 6.98-7.02 (m, 1H), 7.14-7.21 (m, 2H), 7.71 (d, *J* = 8 Hz, 1H); <sup>13</sup>C NMR (CDCl<sub>3</sub>), δ: 17.94, 36.64, 122.70, 123.93, 126.91, 128.50, 130.41, 137.39, 156.10; HRESIMS calcd. for C<sub>10</sub>H<sub>14</sub>N<sub>2</sub>O<sub>2</sub>Na (M+Na<sup>+</sup>): 201.1004; found 201.1000.

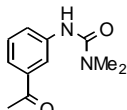

Following the general procedure **A**, using aniline (135 mg, 1 mmol), DMAP (122 mg, 1 mmol), pyridine (0.32 mL, 4 mmol), *N,N*-dimethylcarbamoyl chloride (0.18 mL, 2 mmol), and CH<sub>2</sub>Cl<sub>2</sub> (2 mL), yielded the product **1m** (201 mg, 98%); <sup>1</sup>H NMR (CDCl<sub>3</sub>) δ: 2.60 (s, 3H), 3.06 (s, 6H), 6.46 (brs, 1H), 7.39 (t, *J* = 8 Hz, 1H), 7.61 (d, *J* = 8 Hz, 1H), 7.76 (d, *J* = 8 Hz, 1H), 7.89 (s, 1H); <sup>13</sup>C NMR (CDCl<sub>3</sub>), δ: 26.83, 36.62, 119.43, 122.91, 124.77, 129.18, 137.73, 140.10, 155.89, 198.47; HRESIMS calcd. for C<sub>11</sub>H<sub>14</sub>N<sub>2</sub>O<sub>2</sub>Na (M+Na<sup>+</sup>): 229.0953; found 229.0948.

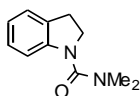

Following the general procedure **A**, using aniline (0.11 mL, 1 mmol), DMAP (122 mg, 1 mmol), pyridine (0.32 mL, 4 mmol), *N,N*-dimethylcarbamoyl chloride (0.18 mL, 2 mmol), and CH<sub>2</sub>Cl<sub>2</sub> (2 mL), yielded the product **1n** (189 mg, 99%); <sup>1</sup>H NMR (CDCl<sub>3</sub>) δ: 2.93 (s, 6H), 3.02 (t, *J* = 8 Hz, 2H), 3.90 (t, *J* = 8 Hz, 2H), 6.87-6.94 (m, 2H), 7.11-7.18 (m, 2H); <sup>13</sup>C NMR (CDCl<sub>3</sub>), δ: 28.15, 38.17, 50.37, 113.36, 121.34, 124.84, 127.01, 131.40, 144.37, 160.30; HRESIMS calcd. for C<sub>11</sub>H<sub>14</sub>N<sub>2</sub>O<sub>2</sub>Na (M+Na<sup>+</sup>): 213.1004; found 213.0997.

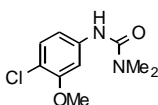

Following the general procedure **A**, using aniline (1 mmol), DMAP (122 mg, 1 mmol), pyridine (0.32 mL, 4 mmol), *N,N*-dimethylcarbamoyl chloride (0.18 mL, 2 mmol), and CH<sub>2</sub>Cl<sub>2</sub> (2 mL), yielded the product **1q** (81%);

<sup>1</sup>H NMR (acetone-*d*<sub>6</sub>) δ: 2.99 (s, 6H), 3.81 (s, 3H), 3.84 (s, 3H), 7.09 (dd, *J* = 2.4 and 8.7 Hz, 1H), 7.18 (d, *J* = 8.7 Hz, 1H), 7.51 (d, *J* = 2.4 Hz, 1H), 7.89 (brs, 1H). <sup>13</sup>C NMR (acetone-*d*<sub>6</sub>) δ: 35.57, 56.25, 105.02, 112.78, 115.07, 130.15, 142.08, 155.78, 156.44; HRESIMS calcd. for C<sub>10</sub>H<sub>13</sub>N<sub>2</sub>O<sub>2</sub>Na (M+Na<sup>+</sup>): 251.0563; found 251.0569.

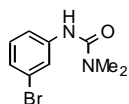

Following the general procedure **A**, using aniline (1 mmol), DMAP (122 mg, 1 mmol), pyridine (0.32 mL, 4 mmol), *N,N*-dimethylcarbamoyl chloride (0.18 mL, 2 mmol), and CH<sub>2</sub>Cl<sub>2</sub> (2 mL), yielded the product **1q** (79%);

<sup>1</sup>H NMR (acetone-*d*<sub>6</sub>) δ: 2.99 (s, 6H), 7.08-7.18 (m, 2H), 7.48 (d, *J* = 8.0 Hz, 1H), 7.90-7.91 (m, 2H). <sup>13</sup>C NMR (acetone-*d*<sub>6</sub>) δ: 36.52, 118.77, 122.47, 122.84, 125.16, 130.88, 143.53, 156.22; HRESIMS calcd. for C<sub>9</sub>H<sub>11</sub>N<sub>2</sub>ONa (M+Na<sup>+</sup>): 264.9952; found 264.9953.

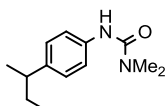

Following the general procedure **A**, using aniline (1 mmol), DMAP (122 mg, 1 mmol), pyridine (0.32 mL, 4 mmol), *N,N*-dimethylcarbamoyl chloride (0.18 mL, 2 mmol), and CH<sub>2</sub>Cl<sub>2</sub> (2 mL), yielded the product **1q** (90%);

<sup>1</sup>H NMR (CDCl<sub>3</sub>) δ: 0.80 (t, *J* = 7.6 Hz, 3H), 1.29 (d, *J* = 6.8 Hz, 3H), 1.56 (m, 2H), 2.53 (m, 1H), 3.03 (s, 6H), 6.22 (brs, 1H), 7.09 (d, *J* = 8.4 Hz, 1H), 7.28 (d, *J* = 8.4 Hz, 1H); <sup>13</sup>C NMR (CDCl<sub>3</sub>) δ: 12.13, 21.86, 31.11, 36.25, 40.93, 120.52, 126.98, 137.13, 141.96, 156.28; HRESIMS calcd. for C<sub>13</sub>H<sub>20</sub>N<sub>2</sub>ONa (M+Na<sup>+</sup>): 243.1473; found 243.1471.

## II. C–H arylations with aryl iodide

### General procedure B [analogous as described in ref <sup>3</sup>].

Aryl urea **1** (0.25 mmol), aryl iodide **2** (0.5 mmol), AgOAc (0.5 mmol, 83 mg), and Pd(OAc)<sub>2</sub> (0.025 mmol, 5.6 mg) were sequentially added under air to a reaction tube equipped with a stir bar and a septum. An aqueous solution containing the surfactant (1.0 mL, 2 wt %), and 48 wt % HBF<sub>4</sub> (1.25 mmol, 0.16 mL) was added by syringe and the resulting mixture vigorously stirred for 20 h at ambient temperature. After this time, the contents of the flask were quenched with aqueous NaHCO<sub>3</sub> and extracted with EtOAc. The solution obtained was filtered through the plug of silica gel and anhydrous MgSO<sub>4</sub>, and then concentrated by rotary evaporation. The residue was purified by flash chromatography, eluting with hexane/EtOAc to afford the product. All products are reported previously (See also section III).<sup>1,2</sup>

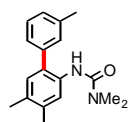

Following the general procedure above, using **1d** (48 mg, 0.25 mmol), *m*-tolyl-I (109 mg, 0.50 mmol), AgOAc (0.5 mmol, 83 mg), and Pd(OAc)<sub>2</sub> (0.025 mmol, 5.6 mg), 2 wt % Brij 35 solution (1.0 mL) 48 wt % aqueous HBF<sub>4</sub> (1.25 mmol, 0.16 mL), the product **3r** was obtained (56 mg, 79%), <sup>1</sup>H NMR (CDCl<sub>3</sub>) δ: 2.23 (s, 3H), 2.29 (s, 3H), 2.39 (s, 3H), 2.81 (s, 6H), 6.44 (brs, 1H), 6.96 (s, 1H), 7.15-7.17 (m, 3H), 7.33 (dd, *J* = 7.2 and 8.2 Hz, 1H), 7.94 (s, 1H).

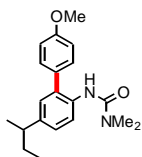

Following the general procedure above, using **1q** (55 mg, 0.25 mmol), *p*-An-I (117 mg, 0.50 mmol), AgOAc (0.5 mmol, 83 mg), and Pd(OAc)<sub>2</sub> (0.025 mmol, 5.6 mg), 2 wt % Brij 35 solution (1.0 mL) 48 wt % aqueous HBF<sub>4</sub> (1.25 mmol, 0.16 mL), the product **3cc** was obtained (58 mg, 71%); <sup>1</sup>H NMR (CDCl<sub>3</sub>) δ: 0.83 (t, *J* = 7.4 Hz, 3H), 1.22 (t, *J* = 6.9 Hz, 3H), 1.54-1.61 (m, 2H), 2.55 (sext, *J* = 6.9 Hz, 1H), 2.81 (s, 6H), 3.85 (s, 3H), 6.43 (brs, 1H), 6.98 (brs, 1H), 7.00 (d, *J* = 8.4 Hz, 2H), 7.13 (dd, *J* = 2.1 and 8.4 Hz, 1H), 7.32 (d, *J* = 8.4 Hz, 2H), 8.01 (d, *J* = 8.4 Hz, 1H).

### III. C–H Suzuki–Miyaura

**General procedure C [analogous as described in ref 4].**

Arylurea **1** (0.25 mmol), arylboronic acid **2** (1.5–3 equiv), 1,4-benzoquinone (2–5 equiv), and [Pd(MeCN)<sub>4</sub>](BF<sub>4</sub>)<sub>2</sub> (0.025 mmol, 11 mg) were sequentially added in air to a reaction tube equipped with a stir bar and a septum. EtOAc was added by syringe and the resulting mixture vigorously stirred for 20 h at ambient temperature. After this time, the contents of the flask were quenched with aqueous NaOH (to remove 1,4-hydroxybenzene) and extracted with EtOAc. The solution obtained was filtered through the plug of silica gel and anhydrous MgSO<sub>4</sub>, and then concentrated by rotary evaporation. The residue was purified by flash chromatography, eluting with hexane/EtOAc to afford the product. All products are reported previously except **3ii**.<sup>1,2</sup>

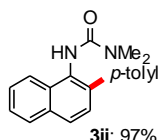

Following the general procedure above, using arylurea (53 mg, 0.25 mmol), *p*-tolylB(OH)<sub>2</sub> (102 mg, 0.75 mmol), BQ (1.25 mmol, 135 mg), and [Pd(MeCN)<sub>4</sub>](BF<sub>4</sub>)<sub>2</sub> (0.025 mmol, 11 mg), EtOAc (1.0 mL), yielded the product **3ii** (73 mg, 97%); <sup>1</sup>H NMR (CDCl<sub>3</sub>) δ: 2.41 (s, 3H), 2.91 (s, 6H), 6.02 (brs, 1H), 7.25 (d, *J* = 8.1 Hz, 2H), 7.33 (d, *J* = 8.8 Hz, 2H), 7.43 (d, *J* = 8.1 Hz, 1H), 7.46-7.56 (m, 2H), 7.78 (d, *J* = 8.4 Hz, 1H), 7.83 (d, *J* = 8.8 Hz, 1H), 7.99 (d, *J* = 8.8 Hz, 1H). <sup>13</sup>C NMR (CDCl<sub>3</sub>) δ: 20.85, 36.18, 123.96, 125.45, 126.05, 126.38, 127.29, 127.50, 128.69, 128.81, 130.80, 133.25, 134.71, 136.38, 136.73, 157.26; HRESIMS calcd. for C<sub>20</sub>H<sub>20</sub>N<sub>2</sub>ONa (M+Na<sup>+</sup>): 327.1473; found 327.1479.

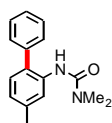

Following the general procedure above, using **1b** (44 mg, 0.25 mmol), PhB(OH)<sub>2</sub> (96 mg, 0.75 mmol), BQ (1.25 mmol, 135 mg), and [Pd(MeCN)<sub>4</sub>](BF<sub>4</sub>)<sub>2</sub> (0.025 mmol, 11 mg), EtOAc (1.0 mL), yielded the product **3a** (61 mg, 96%); <sup>1</sup>H NMR (CDCl<sub>3</sub>) δ: 2.38 (s, 3H), 2.79 (s, 6H), 6.48 (brs,



1H), 6.90 (dd,  $J = 1.0$  and  $7.7$  Hz, 1H), 7.08 (d,  $J = 7.7$  Hz, 1H), 7.35-7.38 (m, 3H), 7.43-7.47 (m, 2H), 8.02 (brs, 1H).

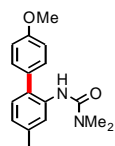

Following the general procedure above, using **1b** (44 mg, 0.25 mmol), *p*-AnB(OH)<sub>2</sub> (114 mg, 0.75 mmol), BQ (1.25 mmol, 135 mg), and [Pd(MeCN)<sub>4</sub>](BF<sub>4</sub>)<sub>2</sub> (0.025 mmol, 11 mg), EtOAc (1.0 mL), yielded the product **3b** (53 mg, 75%); <sup>1</sup>H NMR (CDCl<sub>3</sub>)  $\delta$ : 2.37 (s, 3H), 2.81 (s, 6H), 3.84 (s, 3H), 6.50 (brs, 1H), 6.87 (dd,  $J = 1.0$  and  $7.7$  Hz, 1H), 6.98 (d,  $J = 8.7$  Hz, 2H), 7.05 (d,  $J = 7.7$  Hz, 1H), 7.28 (d,  $J = 8.7$  Hz, 2H), 8.01 (brs, 1H).

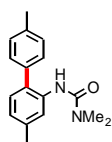

Following the general procedure above, using **1b** (44 mg, 0.25 mmol), *p*-tolylB(OH)<sub>2</sub> (102 mg, 0.75 mmol), BQ (1.25 mmol, 135 mg), and [Pd(MeCN)<sub>4</sub>](BF<sub>4</sub>)<sub>2</sub> (0.025 mmol, 11 mg), EtOAc (1.0 mL), yielded the product **3c** (60 mg, 90%); <sup>1</sup>H NMR (CDCl<sub>3</sub>)  $\delta$ : 2.38 (s, 3H), 2.40 (s, 3H), 2.81 (s, 6H), 6.52 (brs, 1H), 6.88 (dd,  $J = 1.0$  and  $7.7$  Hz, 1H), 7.07 (d,  $J = 7.7$  Hz, 1H), 7.26 (brs, 4H), 8.02 (s, 1H).

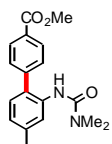

Following the general procedure above, using **1b** (44 mg, 0.25 mmol), *p*-MeCO<sub>2</sub>C<sub>6</sub>H<sub>4</sub>B(OH)<sub>2</sub> (135 mg, 0.75 mmol), BQ (1.25 mmol, 135 mg), and [Pd(MeCN)<sub>4</sub>](BF<sub>4</sub>)<sub>2</sub> (0.025 mmol, 11 mg), EtOAc (1.0 mL), yielded the product **3d** (73 mg, 94%); <sup>1</sup>H NMR (CDCl<sub>3</sub>)  $\delta$ : 2.38 (s, 3H), 2.82 (s, 6H), 3.94 (s, 3H), 6.37 (brs, 1H), 6.92 (dd,  $J = 1.2$  and  $8.4$  Hz, 1H), 7.09 (d,  $J = 7.8$  Hz, 1H), 7.46 (d,  $J = 7.8$  Hz, 2H), 7.95 (brs, 1H), 8.12 (d,  $J = 8.4$  Hz, 2H).

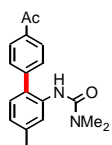

Following the general procedure above, using **1b** (44 mg, 0.25 mmol), *p*-AcC<sub>6</sub>H<sub>4</sub>B(OH)<sub>2</sub> (123 mg, 0.75 mmol), BQ (1.25 mmol, 135 mg), and [Pd(MeCN)<sub>4</sub>](BF<sub>4</sub>)<sub>2</sub> (0.025 mmol, 11 mg), EtOAc (1.0 mL), yielded the product **3e** (63 mg, 86%); <sup>1</sup>H NMR (CDCl<sub>3</sub>)  $\delta$ : 2.38 (s, 3H), 2.64 (s, 3H), 2.83 (s,

6H), 6.38 (brs, 1H), 6.93 (d,  $J=7.7$  Hz, 1H), 7.09 (d,  $J=7.7$  Hz, 1H), 7.49 (d,  $J=8.3$  Hz, 2H), 7.93 (brs, 1H), 8.04 (d,  $J=8.3$  Hz, 2H).

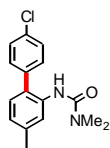

Following the general procedure above, using **1b** (44 mg, 0.25 mmol), *p*-ClC<sub>6</sub>H<sub>4</sub>B(OH)<sub>2</sub> (117 mg, 0.75 mmol), BQ (1.25 mmol, 135 mg), and [Pd(MeCN)<sub>4</sub>](BF<sub>4</sub>)<sub>2</sub> (0.025 mmol, 11 mg), EtOAc (1.0 mL), yielded the product **3f** (67 mg, 94%); <sup>1</sup>H NMR (CDCl<sub>3</sub>)  $\delta$ : 2.37 (s, 3H), 2.83 (s, 6H), 6.33 (brs, 1H), 6.91 (d,  $J=7.7$  Hz, 1H), 7.05 (d,  $J=7.7$  Hz, 1H), 7.30 (d,  $J=8.4$  Hz, 2H), 7.42 (d,  $J=8.4$  Hz, 2H), 7.93 (brs, 1H).

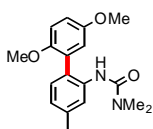

Following the general procedure above, using **1b** (44 mg, 0.25 mmol), 2,5-(MeO)<sub>2</sub>C<sub>6</sub>H<sub>3</sub>B(OH)<sub>2</sub> (136 mg, 0.75 mmol), BQ (1.25 mmol, 135 mg), and [Pd(MeCN)<sub>4</sub>](BF<sub>4</sub>)<sub>2</sub> (0.025 mmol, 11 mg), EtOAc (1.0 mL), yielded the product **3g** (77 mg, 98%); <sup>1</sup>H NMR (CDCl<sub>3</sub>)  $\delta$ : 2.38 (s, 3H), 2.83 (s, 6H), 3.74 (s, 3H), 3.77 (s, 3H), 6.79 (d,  $J=3.0$  Hz, 1H), 6.89 (dd,  $J=3.0$  and 8.9 Hz, 1H), 6.89-6.90 (m, 2H), 7.03 (brs, 1H), 7.10 (d,  $J=7.8$  Hz, 1H), 7.78 (brs, 1H).

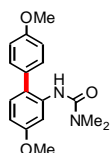

Following the general procedure above, using **1a** (48 mg, 0.25 mmol), *p*-AnB(OH)<sub>2</sub> (114 mg, 0.75 mmol), BQ (0.5 mmol, 54 mg), and [Pd(MeCN)<sub>4</sub>](BF<sub>4</sub>)<sub>2</sub> (0.025 mmol, 11 mg), EtOAc (1.0 mL), yielded the product **3h** (60 mg, 81%); <sup>1</sup>H NMR (CDCl<sub>3</sub>)  $\delta$ : 2.81 (s, 6H), 3.84 (s, 6H), 6.60 (brs, 1H), 6.61 (dd,  $J=2.6$  and 8.3 Hz, 1H), 6.98 (d,  $J=8.6$  Hz, 2H), 7.05 (d,  $J=8.3$  Hz, 1H), 7.27 (d,  $J=8.6$  Hz, 2H), 7.92 (d,  $J=2.6$  Hz, 1H).

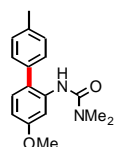

Following the general procedure above, using **1a** (48 mg, 0.25 mmol), *p*-tolylB(OH)<sub>2</sub> (102 mg, 0.75 mmol), BQ (0.5 mmol, 54 mg), and [Pd(MeCN)<sub>4</sub>](BF<sub>4</sub>)<sub>2</sub> (0.025 mmol, 11 mg), EtOAc (1.0 mL), yielded the product **3i** (61 mg, 87%); <sup>1</sup>H NMR (CDCl<sub>3</sub>)  $\delta$ : 2.40 (s, 3H), 2.81 (s, 6H), 3.85 (s, 3H), 6.63 (dd,  $J=2.7$  and 8.5 Hz, 1H), 6.64 (brs, 1H), 7.02 (d,  $J=8.5$  Hz, 1H), 7.25 (brs, 4H), 7.94 (d,  $J=2.7$  Hz, 1H).

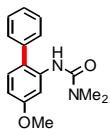

Following the general procedure above, using **1a** (48 mg, 0.25 mmol), PhB(OH)<sub>2</sub> (96 mg, 0.75 mmol), BQ (0.5 mmol, 54 mg), and [Pd(MeCN)<sub>4</sub>](BF<sub>4</sub>)<sub>2</sub> (0.025 mmol, 11 mg), EtOAc (1.0 mL), yielded the product **3j** (62 mg, 70%); <sup>1</sup>H NMR (CDCl<sub>3</sub>) δ: 2.96 (s, 6H), 3.85 (s, 3H), 6.60 (brs, 1H), 6.63 (dd, *J* = 2.6 and 8.4 Hz, 1H), 7.08 (d, *J* = 8.6 Hz, 1H), 7.34-7.38 (m, 3H), 7.43-7.47 (m, 2H), 7.94 (d, *J* = 2.6 Hz, 1H).

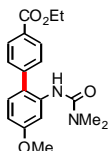

Following the general procedure above, using **1a** (48 mg, 0.25 mmol), **2d** (135 mg, 0.75 mmol), BQ (0.5 mmol, 54 mg), and [Pd(MeCN)<sub>4</sub>](BF<sub>4</sub>)<sub>2</sub> (0.025 mmol, 11 mg), EtOAc (1.0 mL), yielded the product **3k** (60 mg, 70%), <sup>1</sup>H NMR (CDCl<sub>3</sub>) δ: 1.41 (t, *J* = 7.1 Hz, 3H), 2.82 (s, 6H), 3.84 (s, 3H), 4.39 (q, *J* = 7.1 Hz, 2H), 6.49 (brs, 1H), 6.65 (dd, *J* = 2.6 and 8.4 Hz, 1H), 7.08 (d, *J* = 8.4 Hz, 1H), 7.44 (d, *J* = 8.4 Hz, 2H), 7.88 (d, *J* = 2.6 Hz, 1H), 8.11 (d, *J* = 8.4 Hz, 2H).

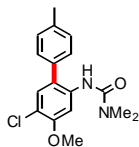

Following the general procedure above, using **1o** (57 mg, 0.25 mmol), *p*-tolylB(OH)<sub>2</sub> (102 mg, 0.75 mmol), BQ (1.25 mmol, 135 mg), and [Pd(MeCN)<sub>4</sub>](BF<sub>4</sub>)<sub>2</sub> (0.025 mmol, 11 mg), EtOAc (1.0 mL), yielded the product **3l** (77 mg, 97%); <sup>1</sup>H NMR (CDCl<sub>3</sub>) δ: 2.40 (s, 3H), 2.81 (s, 6H), 3.95 (s, 3H), 6.65 (brs, 1H), 7.22 (d, *J* = 8.0 Hz, 2H), 7.27 (d, *J* = 8.0 Hz, 2H), 8.09 (brs, 1H).

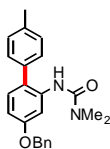

Following the general procedure above, using **1e** (67 mg, 0.25 mmol), *p*-tolylB(OH)<sub>2</sub> (102 mg, 0.75 mmol), BQ (1.25 mmol, 135 mg), and [Pd(MeCN)<sub>4</sub>](BF<sub>4</sub>)<sub>2</sub> (0.025 mmol, 11 mg), EtOAc (1.0 mL), yielded the product **3m** (72 mg, 80%); <sup>1</sup>H NMR (CDCl<sub>3</sub>) δ: 2.40 (s, 3H), 2.82 (s, 6H), 5.11 (s, 2H), 6.65 (brs, 1H), 6.70 (dd, *J* = 2.6 and 8.4 Hz, 1H), 7.08 (d, *J* = 8.4 Hz, 1H), 7.26 (brs, 4H), 7.32 (d, *J* = 7.2 Hz, 1H), 7.39 (t, *J* = 7.2 Hz, 2H), 7.47 (d, *J* = 7.2 Hz, 2H), 8.05 (d, *J* = 2.6 Hz, 1H).

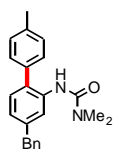

Following the general procedure above, using arylurea (63 mg, 0.25 mmol), *p*-tolylB(OH)<sub>2</sub> (102 mg, 0.75 mmol), BQ (1.25 mmol, 135 mg), and [Pd(MeCN)<sub>4</sub>](BF<sub>4</sub>)<sub>2</sub> (0.025 mmol, 11 mg), EtOAc (1.0 mL), yielded the product **3n** (69 mg, 80%); <sup>1</sup>H NMR (CDCl<sub>3</sub>) δ: 2.38 (s, 3H), 2.79 (s, 6H), 3.98 (s, 2H), 6.54 (brs, 1H), 6.85 (dd, *J* = 1.7 and 7.8 Hz, 1H), 7.07 (d, *J* = 7.8 Hz, 1H), 7.14-7.19 (m, 1H), 7.24-7.27 (m, 8H), 8.11 (d, *J* = 1.7 Hz, 1H).

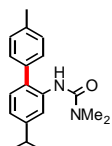

Following the general procedure above, using **1c** (51 mg, 0.25 mmol), *p*-tolylB(OH)<sub>2</sub> (102 mg, 0.75 mmol), BQ (1.25 mmol, 135 mg), and [Pd(MeCN)<sub>4</sub>](BF<sub>4</sub>)<sub>2</sub> (0.025 mmol, 11 mg), EtOAc (1.0 mL), yielded the product **3o** (66 mg, 89%); <sup>1</sup>H NMR (CDCl<sub>3</sub>) δ: 1.29 (t, *J* = 7.0 Hz, 6H), 2.40 (s, 3H), 2.82 (s, 6H), 2.95 (sept, *J* = 7.0 Hz, 1H), 6.57 (brs, 1H), 6.93 (dd, *J* = 1.7 and 8.7 Hz, 1H), 7.11 (d, *J* = 8.7 Hz, 1H), 7.26 (brs, 4H), 8.10 (d, *J* = 1.7 Hz, 1H).

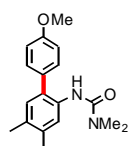

Following the general procedure above, using **1d** (48 mg, 0.25 mmol), *p*-AnB(OH)<sub>2</sub> (114 mg, 0.75 mmol), BQ (1.25 mmol, 135 mg), and [Pd(MeCN)<sub>4</sub>](BF<sub>4</sub>)<sub>2</sub> (0.025 mmol, 11 mg), EtOAc (1.0 mL), yielded the product **3p** (64 mg, 86%), <sup>1</sup>H NMR (CDCl<sub>3</sub>) δ: 2.22 (s, 3H), 2.28 (s, 3H), 2.82 (s, 6H), 3.85 (s, 3H), 6.38 (brs, 1H), 6.95 (brs, 1H), 6.98 (dd, *J* = 8.8 Hz, 2H), 7.28 (d, *J* = 8.8 Hz, 2H), 7.91 (s, 1H).

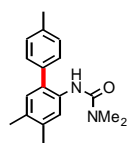

Following the general procedure above, using **1d** (48 mg, 0.25 mmol), *p*-tolylB(OH)<sub>2</sub> (102 mg, 0.75 mmol), BQ (1.25 mmol, 135 mg), and [Pd(MeCN)<sub>4</sub>](BF<sub>4</sub>)<sub>2</sub> (0.025 mmol, 11 mg), EtOAc (1.0 mL), yielded the product **3q** (67 mg, 96%), <sup>1</sup>H NMR (CDCl<sub>3</sub>) δ: 2.22 (s, 3H), 2.29 (s, 3H), 2.39 (s, 3H), 2.81 (s, 6H), 6.42 (brs, 1H), 6.96 (s, 1H), 7.25 (brs, 4H), 7.92 (s, 1H).

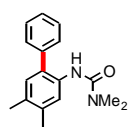

Following the general procedure above, using **1d** (48 mg, 0.25 mmol), PhB(OH)<sub>2</sub> (96 mg, 0.75

mmol), BQ (1.25 mmol, 135 mg), and  $[\text{Pd}(\text{MeCN})_4](\text{BF}_4)_2$  (0.025 mmol, 11 mg), EtOAc (1.0 mL), yielded the product **3s** (64 mg, 95%),  $^1\text{H}$  NMR ( $\text{CDCl}_3$ )  $\delta$ : 2.23 (s, 3H), 2.30 (s, 3H), 2.80 (s, 6H), 6.37 (brs, 1H), 6.98 (s, 1H), 7.34-7.38(m, 3H), 7.43-7.47 (m, 2H), 7.93 (s, 1H).

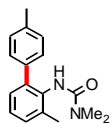

Following the general procedure above, using **1l** (44 mg, 0.25 mmol), *p*-tolylB(OH)<sub>2</sub> (102 mg, 0.75 mmol), BQ (1.25 mmol, 135 mg), and  $[\text{Pd}(\text{MeCN})_4](\text{BF}_4)_2$  (0.025 mmol, 11 mg), EtOAc (1.0 mL), yielded the product **3t** (43 mg, 65%);  $^1\text{H}$  NMR ( $\text{CDCl}_3$ )  $\delta$ : 2.32 (s, 3H), 2.39 (s, 3H), 2.85 (s, 6H), 5.71 (brs, 1H), 7.12 (dd,  $J$  = 1.8 and 7.5 Hz, 1H), 7.17 (t,  $J$  = 7.5 Hz, 1H), 7.20-7.26 (m, 5H).

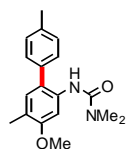

Following the general procedure above, using **1h** (52 mg, 0.25 mmol), *p*-tolylB(OH)<sub>2</sub> (102 mg, 0.75 mmol), BQ (1.25 mmol, 135 mg), and  $[\text{Pd}(\text{MeCN})_4](\text{BF}_4)_2$  (0.025 mmol, 11 mg), EtOAc (1.0 mL), yielded the product **3u** (60 mg, 80%);  $^1\text{H}$  NMR ( $\text{CDCl}_3$ )  $\delta$ : 2.18 (s, 3H), 2.39 (s, 3H), 2.82 (s, 6H), 3.89 (s, 3H), 6.59 (brs, 1H), 6.94 (s, 1H), 7.24 (brs, 4H), 7.87 (s, 1H).

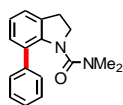

Following the general procedure above, using **1n** (47 mg, 0.25 mmol), PhB(OH)<sub>2</sub> (96 mg, 0.75 mmol), BQ (1.25 mmol, 135 mg), and  $[\text{Pd}(\text{MeCN})_4](\text{BF}_4)_2$  (0.025 mmol, 11 mg), EtOAc (1.0 mL), yielded the product **3v** (60 mg, 90%);  $^1\text{H}$  NMR ( $\text{CDCl}_3$ )  $\delta$ : 2.51 (s, 6H), 3.07 (t,  $J$  = 8.0 Hz, 2H), 3.94 (t,  $J$  = 8.0 Hz, 2H), 6.99 (t,  $J$  = 7.8 Hz, 1H), 7.12 (t,  $J$  = 8.1 Hz, 2H), 7.20-7.24 (m, 2H), 7.32 (d,  $J$  = 7.8 Hz, 2H), 7.39 (d,  $J$  = 8.1 Hz, 2H).

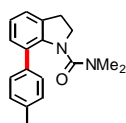

Following the general procedure above, using **1n** (47 mg, 0.25 mmol), *p*-tolylB(OH)<sub>2</sub> (102 mg, 0.75 mmol), BQ (1.25 mmol, 135 mg), and  $[\text{Pd}(\text{MeCN})_4](\text{BF}_4)_2$  (0.025 mmol, 11 mg), EtOAc (1.0 mL), yielded the product **3w** (62 mg, 89%);  $^1\text{H}$  NMR ( $\text{CDCl}_3$ )  $\delta$ : 2.34 (s, 3H), 2.57 (s, 6H), 3.09 (t,  $J$  = 7.9 Hz, 2H), 3.96 (t,  $J$  = 7.9 Hz, 2H), 6.99 (t,  $J$  = 7.8 Hz, 1H), 6.98-7.02 (m, 4H), 7.26 (brs, 1H), 7.32 (d,  $J$  = 8.0 Hz, 2H).

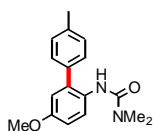

Following the general procedure above, using **1j** (48 mg, 0.25 mmol), *p*-tolylB(OH)<sub>2</sub> (51 mg, 0.375 mmol), BQ (1.25 mmol, 135 mg), and [Pd(MeCN)<sub>4</sub>](BF<sub>4</sub>)<sub>2</sub> (0.025 mmol, 11 mg), EtOAc (1.0 mL), yielded the product **3aa** (58 mg, 82%), <sup>1</sup>H NMR (CDCl<sub>3</sub>) δ: 2.39 (s, 3H), 2.80 (s, 6H), 3.78 (s, 3H), 6.29 (brs, 1H), 6.75 (d, *J* = 3.0 Hz, 1H), 6.87 (dd, *J* = 3.0 and 9.0 Hz, 1H), 7.28 (brs, 4H), 7.93 (d, *J* = 9.0 Hz, 1H).

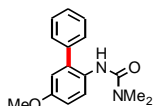

Following the general procedure above, using **1j** (48 mg, 0.25 mmol), PhB(OH)<sub>2</sub> (46 mg, 0.375 mmol), BQ (1.25 mmol, 135 mg), and [Pd(MeCN)<sub>4</sub>](BF<sub>4</sub>)<sub>2</sub> (0.025 mmol, 11 mg), EtOAc (1.0 mL), yielded the product **3bb** (60 mg, 89%), <sup>1</sup>H NMR (CDCl<sub>3</sub>) δ: 2.79 (s, 6H), 3.79 (s, 3H), 6.24 (brs, 1H), 6.77 (d, *J* = 3.0 Hz, 1H), 6.89 (dd, *J* = 3.0 and 9.0 Hz, 1H), 7.26-7.40 (m, 3H), 7.44-7.48 (m, 2H), 7.93 (d, *J* = 9.0 Hz, 1H).

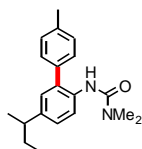

Following the general procedure above, using **1q** (55 mg, 0.25 mmol), *p*-tolylB(OH)<sub>2</sub> (51 mg, 0.375 mmol), BQ (1.25 mmol, 135 mg), and [Pd(MeCN)<sub>4</sub>](BF<sub>4</sub>)<sub>2</sub> (0.025 mmol, 11 mg), EtOAc (1.0 mL), yielded the product **3dd** (68 mg, 88%); <sup>1</sup>H NMR (CDCl<sub>3</sub>) δ: 0.83 (t, *J* = 7.3 Hz, 3H), 1.22 (t, *J* = 7.0 Hz, 3H), 1.52-1.61 (m, 2H), 2.40 (s, 3H), 2.56 (sext, *J* = 7.0 Hz, 1H), 2.81 (s, 6H), 6.47 (brs, 1H), 6.99 (d, *J* = 2.2 Hz, 1H), 7.13 (dd, *J* = 2.2 and 8.4 Hz, 1H), 7.25-7.30 (m, 4H), 8.01 (d, *J* = 8.4 Hz, 1H).

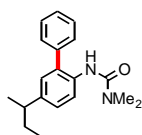

Following the general procedure above, using **1q** (55 mg, 0.25 mmol), PhB(OH)<sub>2</sub> (46 mg, 0.375 mmol), BQ (1.25 mmol, 135 mg), and [Pd(MeCN)<sub>4</sub>](BF<sub>4</sub>)<sub>2</sub> (0.025 mmol, 11 mg), EtOAc (1.0 mL), yielded the product **3ee** (59 mg, 80%); <sup>1</sup>H NMR (CDCl<sub>3</sub>) δ: 0.83 (t, *J* = 7.5 Hz, 3H), 1.22 (t, *J* = 6.9 Hz, 3H), 1.56 (sept, *J* = 7.5 Hz, 2H), 2.54-2.62 (m, 1H), 2.79 (s, 6H), 6.42 (brs, 1H), 7.00 (d, *J* = 1.9 Hz, 1H), 7.15 (dd, *J* = 1.9 and 8.5 Hz, 1H), 7.35-7.40 (m, 3H), 7.44-7.48 (m, 2H), 8.02 (t, *J* = 8.5 Hz, 1H).

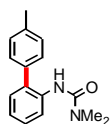

Following the general procedure above, using **1k** (41 mg, 0.25 mmol), *p*-tolylB(OH)<sub>2</sub> (51 mg, 0.375 mmol), BQ (1.25 mmol, 135 mg), and [Pd(MeCN)<sub>4</sub>](BF<sub>4</sub>)<sub>2</sub> (0.025 mmol, 11 mg), EtOAc (1.0 mL), yielded the product **3gg** (50 mg, 78%); <sup>1</sup>H NMR (CDCl<sub>3</sub>) δ: 2.40 (s, 3H), 2.80 (s, 6H), 6.55 (brs, 1H), 7.05 (t, *J* = 7.4 Hz, 1H), 7.17 (d, *J* = 7.4 Hz, 1H), 7.27 (brs, 4H), 7.31 (t, *J* = 8.3 Hz, 1H), 8.17 (d, *J* = 8.3 Hz, 1H).

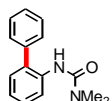

Following the general procedure above, using **1k** (41 mg, 0.25 mmol), PhB(OH)<sub>2</sub> (46 mg, 0.375 mmol), BQ (1.25 mmol, 135 mg), and [Pd(MeCN)<sub>4</sub>](BF<sub>4</sub>)<sub>2</sub> (0.025 mmol, 11 mg), EtOAc (1.0 mL), yielded the product **3hh** (50 mg, 83%); <sup>1</sup>H NMR (CDCl<sub>3</sub>) δ: 2.78 (s, 6H), 6.51 (brs, 1H), 7.06 (dt, *J* = 1.2 and 7.5 Hz, 1H), 7.19 (dd, *J* = 1.6 and 7.5 Hz, 1H), 7.31-7.40 (m, 4H), 7.45-7.49 (m, 2H), 8.16 (dd, *J* = 1.2 and 7.4 Hz, 1H).

#### IV. Fujiwara–Moritani reactions

**General procedure D in water [analogous as described in ref <sup>5</sup>].**

Arylurea **1** (0.25 mmol), acrylate ester (0.5 mmol), 1,4-benzoquinone (0.25 mmol, 27 mg), AgOAc (0.5 mmol, 85 mg), and Pd(OAc)<sub>2</sub> (0.025 mmol, 5.6 mg) were sequentially added under air to a reaction tube equipped with a stir bar and a septum. An aqueous solution containing the surfactant (1.0 mL, 2 wt %), and 48 wt % HBF<sub>4</sub> (1.25 mmol, 0.16 mL) was added by syringe and the resulting mixture vigorously stirred for 20 h at ambient temperature. After this time, the contents of the flask were quenched with aqueous NaHCO<sub>3</sub> and extracted with EtOAc. The solution obtained was filtered through the plug of silica gel and anhydrous MgSO<sub>4</sub>, and then concentrated by rotary evaporation. The residue was purified by flash chromatography, eluting with hexane/EtOAc to afford the product. All products are reported except **5d–5h**.<sup>3</sup>

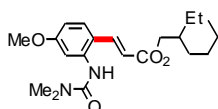

Following the general procedure above, using **1a** (48 mg, 0.25 mmol), acrylate ester (92 mg, 0.50 mmol), 1,4-benzoquinone (0.25 mmol, 27 mg), AgNO<sub>3</sub> (0.5 mmol, 85 mg), and [Pd(MeCN)<sub>4</sub>](BF<sub>4</sub>)<sub>2</sub> (0.025 mmol, 11 mg), 2 wt % PTS solution (1.0 mL), yielded the product **5a** (69 mg, 74%), <sup>1</sup>H NMR (CDCl<sub>3</sub>) δ: 0.90 (t, *J* = 6.8 Hz, 3H), 0.91 (t, *J* = 7.5 Hz, 3H), 1.25-1.45 (m, 8H), 1.60-1.67 (m,

1H), 3.06 (s, 6H), 3.82 (s, 3H), 4.08 (dd,  $J = 6.0$  and  $11$  Hz, 1H), 4.11 (dd,  $J = 5.7$  and  $11$  Hz, 1H), 6.28 (d,  $J = 15.7$  Hz, 1H), 6.45 (brs, 1H), 6.67 (dd,  $J = 2.6$  and  $8.7$  Hz, 1H), 7.40 (d,  $J = 2.5$  Hz, 1H), 7.46 (d,  $J = 8.7$  Hz, 1H), 7.75 (d,  $J = 15.7$  Hz, 1H).

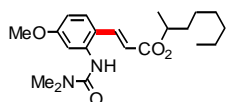

Following the general procedure above, using **1a** (48 mg, 0.25 mmol), acrylate ester (120 mg, 0.50 mmol), 1,4-benzoquinone (0.25 mmol, 27 mg), AgNO<sub>3</sub> (0.5 mmol, 85 mg), and [Pd(MeCN)<sub>4</sub>](BF<sub>4</sub>)<sub>2</sub> (0.025 mmol, 11 mg), 2 wt % PTS solution (1.0 mL), yielded the product **5b** (71 mg, 76%), <sup>1</sup>H NMR (CDCl<sub>3</sub>) δ: 0.88 (t,  $J = 7.2$  Hz, 3H), 1.26-1.49 (m, 12H), 1.55-1.61 (m, 1H), 3.07 (s, 6H), 3.82 (s, 3H), 5.00 (sext,  $J = 6.2$  Hz, 1H), 6.28 (d,  $J = 15.7$  Hz, 1H), 6.43 (brs, 1H), 6.67 (dd,  $J = 2.6$  and  $8.7$  Hz, 1H), 7.41 (d,  $J = 2.6$  Hz, 1H), 7.45 (d,  $J = 8.7$  Hz, 1H), 7.75 (d,  $J = 15.7$  Hz, 1H).

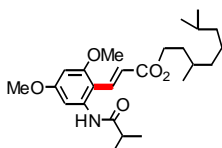

Following the general procedure above, using **1g** (56 mg, 0.25 mmol), acrylate ester (106 mg, 0.50 mmol), 1,4-benzoquinone (0.25 mmol, 27 mg), AgNO<sub>3</sub> (0.5 mmol, 85 mg), and [Pd(MeCN)<sub>4</sub>](BF<sub>4</sub>)<sub>2</sub> (0.025 mmol, 11 mg), 2 wt % PTS solution (1.0 mL), yielded the product **5c** (86 mg, 80%), <sup>1</sup>H NMR (CDCl<sub>3</sub>) δ: 0.86 (d,  $J = 6.5$  Hz, 6H), 0.92 (d,  $J = 6.5$  Hz, 3H), 1.11-1.17 (m, 3H), 1.31 (d,  $J = 6.8$  Hz, 6H), 1.23-1.33 (m, 3H), 1.45-1.54 (m, 3H), 1.69-1.77 (m, 1H), 2.57 (sept,  $J = 6.8$  Hz, 1H), 3.83 (s, 3H), 3.84 (s, 3H), 4.19-4.25 (m, 2H), 6.25 (s, 1H), 6.48 (d,  $J = 16.2$  Hz, 1H), 7.35 (s, 1H), 7.38 (brs, 1H), 7.75 (d,  $J = 16.2$  Hz, 1H).

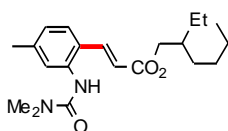

Following the general procedure above, using using **1b** (44 mg, 0.25 mmol), acrylate ester (92 mg, 0.50 mmol), 1,4-benzoquinone (0.25 mmol, 27 mg), AgOAc (0.5 mmol, 83 mg), and [Pd(MeCN)<sub>4</sub>](BF<sub>4</sub>)<sub>2</sub> (0.025 mmol, 11 mg), 2 wt % Brij 35 solution (1.0 mL), yielded the product **5d** (77 mg, 86%), <sup>1</sup>H NMR (CDCl<sub>3</sub>) δ: 0.89-0.92 (m, 6H), 1.25-1.43 (m, 8H), 1.54-1.64 (m, 1H), 2.33 (s, 3H), 3.03 (s, 6H), 4.03 (dd,  $J = 6.0$  and  $11.0$  Hz, 1H), 4.07 (dd,  $J = 5.7$  and  $11.0$  Hz, 1H), 6.34 (d,  $J = 15.8$  Hz, 1H), 6.46 (brs, 1H), 6.94 (d,  $J = 8.1$  Hz, 1H), 7.42-7.44 (m, 2H), 7.75 (d,  $J = 15.8$  Hz, 1H). <sup>13</sup>C NMR (CDCl<sub>3</sub>) δ: 11.16, 14.19, 21.63, 23.11, 29.07, 30.58, 36.64, 38.95, 67.04, 118.89, 124.94, 125.75, 125.87, 126.94, 137.60, 139.83, 141.42, 156.12, 167.41; HRESIMS calcd. for C<sub>21</sub>H<sub>32</sub>N<sub>2</sub>O<sub>3</sub>Na (M+Na<sup>+</sup>): 383.2310; found 383.2311.



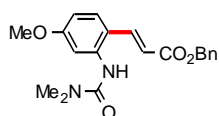

Following the general procedure above, using using **1a** (48 mg, 0.25 mmol), acrylate ester (81 mg, 0.50 mmol), 1,4-benzoquinone (0.25 mmol, 27 mg), AgOAc (0.5 mmol, 83 mg), and [Pd(MeCN)<sub>4</sub>](BF<sub>4</sub>)<sub>2</sub> (0.025 mmol, 11 mg), 2 wt % Brij 35 solution (1.0 mL), yielded the product **5e** (88 mg, 99%), <sup>1</sup>H NMR (CDCl<sub>3</sub>) δ: 2.99 (s, 6H), 3.78 (s, 3H), 5.18 (s, 2H), 6.29 (d, *J* = 15.7 Hz, 1H), 6.60 (brs, 1H), 6.65 (dd, *J* = 2.6 and 8.8 Hz, 1H), 7.26 (d, *J* = 2.6 Hz, 1H), 7.31-7.37 (m, 5H), 7.42 (d, *J* = 8.8 Hz, 1H), 7.77 (d, *J* = 15.9 Hz, 1H). <sup>13</sup>C NMR (CDCl<sub>3</sub>) δ: 36.63, 55.55, 66.37, 109.11, 111.96, 116.48, 119.71, 128.25, 128.31, 128.53, 128.69, 136.24, 139.63, 140.19, 155.96, 161.91, 167.19; HRESIMS calcd. for C<sub>20</sub>H<sub>22</sub>N<sub>2</sub>O<sub>4</sub>Na (M+Na<sup>+</sup>): 377.1477; found 377.1478.

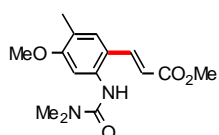

Following the general procedure above, using using **1h** (52 mg, 0.25 mmol), acrylate ester (43 mg, 0.50 mmol), 1,4-benzoquinone (0.25 mmol, 27 mg), AgOAc (0.5 mmol, 83 mg), and [Pd(MeCN)<sub>4</sub>](BF<sub>4</sub>)<sub>2</sub> (0.025 mmol, 11 mg), 2 wt % Brij 35 solution (1.0 mL), yielded the product **5f** (65 mg, 89%), <sup>1</sup>H NMR (CDCl<sub>3</sub>) δ: 2.15 (s, 3H), 3.04 (s, 6H), 3.74 (s, 3H), 3.81 (s, 3H), 6.24 (d, *J* = 15.8 Hz, 1H), 6.58 (brs, 1H), 7.18 (s, 1H), 7.26 (s, 1H), 7.74 (d, *J* = 15.8 Hz, 1H). <sup>13</sup>C NMR (CDCl<sub>3</sub>) δ: 15.94, 36.66, 51.69, 55.59, 106.68, 116.05, 119.04, 123.50, 128.53, 137.43, 139.89, 156.15, 159.96, 167.96; HRESIMS calcd. for C<sub>15</sub>H<sub>20</sub>N<sub>2</sub>O<sub>4</sub>Na (M+Na<sup>+</sup>): 315.1321; found 315.1322.

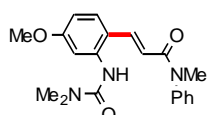

Following the general procedure above, using **1a** (48 mg, 0.25 mmol), acrylamide (80 mg, 0.50 mmol), 1,4-benzoquinone (0.25 mmol, 27 mg), AgOAc (0.5 mmol, 83 mg), and [Pd(MeCN)<sub>4</sub>](BF<sub>4</sub>)<sub>2</sub> (0.025 mmol, 11 mg), 2 wt % Brij 35 solution (1.0 mL), yielded the product **5g** (73 mg, 83%), <sup>1</sup>H NMR (CDCl<sub>3</sub>) δ: 3.05 (s, 6H), 3.28 (s, 3H), 3.76 (s, 3H), 6.17 (d, *J* = 15.3 Hz, 1H), 6.52 (dd, *J* = 2.6 and 8.8 Hz, 1H), 6.87 (brs, 1H), 7.07 (d, *J* = 8.8 Hz, 1H), 7.15 (d, *J* = 7.2 Hz, 1H), 7.33-7.43 (m, 4H), 7.77 (d, *J* = 15.3 Hz, 1H). <sup>13</sup>C NMR (CDCl<sub>3</sub>) δ: 36.69, 37.56, 55.50, 108.19, 111.59, 117.75, 119.58, 127.40, 127.77, 127.95, 129.76, 136.56, 139.40, 143.57, 155.87, 161.30, 166.42; HRESIMS calcd. for C<sub>20</sub>H<sub>23</sub>N<sub>3</sub>O<sub>3</sub>Na (M+Na<sup>+</sup>): 376.1637; found 376.1639.

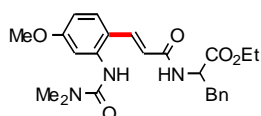

Following the general procedure above, using **1a** (48 mg, 0.25 mmol), acrylamide (123 mg, 0.50 mmol), 1,4-benzoquinone (0.25 mmol, 27 mg), AgOAc (0.5 mmol, 83 mg), and [Pd(MeCN)<sub>4</sub>](BF<sub>4</sub>)<sub>2</sub> (0.025 mmol, 11 mg), 2 wt % Brij 35 solution (1.0 mL), yielded the product **5h** (75 mg, 69%), <sup>1</sup>H NMR (CDCl<sub>3</sub>) δ: 1.21 (t, *J* = 7.2 Hz, 3H), 3.02 (s, 6H), 3.11 (d, *J* = 6.0 Hz, 2H), 3.78 (s, 3H), 4.15 (q, *J* = 7.1 Hz, 2H), 4.84-4.89 (m, 1H), 6.20 (d, *J* = 16.2 Hz, 1H), 6.30-6.34 (m, 1H), 6.60 (dd, *J* = 2.5 and 8.7 Hz, 1H), 6.77 (brs, 1H), 7.10 (dd, *J* = 1.6 and 7.9 Hz, 1H), 7.20-7.28 (m, 2H), 7.33 (s, 1H), 7.36 (d, *J* = 8.8 Hz, 1H), 7.72 (d, *J* = 16.2 Hz, 1H). <sup>13</sup>C NMR (CDCl<sub>3</sub>) δ: 14.23, 36.69, 38.07, 53.56, 55.54, 61.67, 108.56, 111.79, 119.17, 119.39, 127.18, 127.87, 128.64, 129.47, 136.11, 136.43, 139.43, 155.95, 161.49, 165.65, 171.83; HRESIMS calcd. for C<sub>24</sub>H<sub>29</sub>N<sub>3</sub>O<sub>5</sub>Na (M+Na<sup>+</sup>): 462.2005; found 462.2005.

**General procedure E in EtOAc [similar as described in ref. 5].**

Arylurea **1** (0.25 mmol), acrylate ester (0.5 mmol), 1,4-benzoquinone (0.75 mmol, 81 mg), and Pd(OAc)<sub>2</sub> (0.025 mmol, 5.6 mg) were sequentially added under air to a reaction tube equipped with a stir bar and a septum. EtOAc (1.0 mL) and 48 wt % HBF<sub>4</sub> (0.25 mmol, 32 uL) were added by syringe and the resulting mixture vigorously stirred for 20 h at ambient temperature. After this time, the contents of the flask were quenched with aqueous NaHCO<sub>3</sub> and extracted with EtOAc. The solution obtained was filtered through the plug of silica gel and anhydrous MgSO<sub>4</sub>, and then concentrated by rotary evaporation. The residue was purified by flash chromatography, eluting with hexane/EtOAc to afford the product.

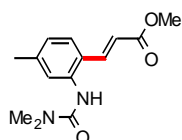

Following the general procedure above, using aryl urea **1b** (44.6 mg, 0.25 mmol), acrylate ester (43 mg, 0.5 mmol), 1,4-benzoquinone (0.75 mmol, 81 mg), Pd(OAc)<sub>2</sub> (0.025 mmol, 5.6 mg), 48 wt % HBF<sub>4</sub> (0.25 mmol, 32 uL), and EtOAc (1 mL), yielded the product **5i** (61.2 mg, 93%); <sup>1</sup>H NMR (CDCl<sub>3</sub>) δ: 2.34 (s, 3H), 3.06 (s, 6H), 3.79 (s, 3H), 6.26 (brs, 1H), 6.36 (d, *J* = 15.5 Hz, 1H), 6.94 (d, *J* = 8 Hz, 1H), 7.41 (d, *J* = 8 Hz, 1H), 7.48 (s, 1H), 7.80 (d, *J* = 15.5 Hz, 1H); <sup>13</sup>C NMR (CDCl<sub>3</sub>) δ: 21.53, 36.57, 51.68, 118.02, 125.21, 125.90, 126.06, 126.84, 137.76, 140.38, 141.33, 156.26, 167.72; HRESIMS calcd. for C<sub>14</sub>H<sub>18</sub>N<sub>2</sub>O<sub>3</sub>Na (M+Na<sup>+</sup>): 285.1215; found 285.1206.

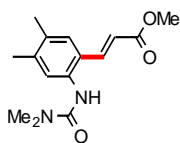

Following the general procedure above, using aryl urea **1d** (48.1 mg, 0.25 mmol), acrylate ester (43 mg, 0.5 mmol), 1,4-benzoquinone (0.75 mmol, 81 mg), Pd(OAc)<sub>2</sub> (0.025 mmol, 5.6 mg), 48 wt % HBF<sub>4</sub> (0.25 mmol, 32 uL), and EtOAc (1 mL), yielded the product **5j** (68.3 mg, 99%); <sup>1</sup>H NMR (CDCl<sub>3</sub>) δ: 2.23 (s, 3H), 2.24 (s, 3H), 3.05 (s, 6H), 3.78 (s, 3H), 6.19 (brs, 1H), 6.36 (d, *J* = 15.5 Hz, 1H), 7.30 (s, 1H), 7.35 (s, 1H), 7.80 (d, *J* = 15.5 Hz, 1H); <sup>13</sup>C NMR (CDCl<sub>3</sub>) δ: 19.33, 19.96, 36.62, 51.69, 117.71, 125.85, 127.09, 127.71, 133.57, 135.60, 140.10, 140.49, 156.53, 167.72; HRESIMS calcd. for C<sub>15</sub>H<sub>20</sub>N<sub>2</sub>O<sub>3</sub>Na (M+Na<sup>+</sup>): 299.1372; found 299.1364.

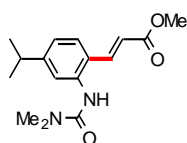

Following the general procedure above, using aryl urea **1c** (51.6 mg, 0.25 mmol), acrylate ester (43 mg, 0.5 mmol), 1,4-benzoquinone (0.75 mmol, 81 mg), Pd(OAc)<sub>2</sub> (0.025 mmol, 5.6 mg), 48 wt % HBF<sub>4</sub> (0.25 mmol, 32 uL), and EtOAc (1 mL), yielded the product **5k** (69.4 mg, 96%); <sup>1</sup>H NMR (CDCl<sub>3</sub>) δ: 1.24 (d, *J* = 7 Hz, 6H), 2.89 (sept, *J* = 7 Hz, 1H), 3.06 (s, 6H), 3.79 (s, 3H), 6.28 (brs, 1H), 6.37 (d, *J* = 16 Hz, 1H), 7.01 (d, *J* = 8 Hz, 1H), 7.46 (d, *J* = 8 Hz, 1H), 7.52 (s, 1H), 7.81 (d, *J* = 16 Hz, 1H); <sup>13</sup>C NMR (CDCl<sub>3</sub>) δ: 23.75, 34.19, 36.67, 51.74, 118.33, 123.17, 123.35, 125.39, 127.13, 137.85, 140.40, 152.29, 156.20, 167.64; HRESIMS calcd. for C<sub>16</sub>H<sub>22</sub>N<sub>2</sub>O<sub>3</sub>Na (M+Na<sup>+</sup>): 313.1528; found 313.1517.

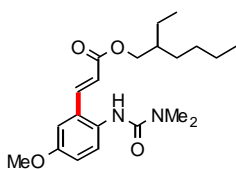

Following the general procedure above, using **1a** (48 mg, 0.25 mmol), acrylate ester (92 mg, 0.50 mmol), 1,4-benzoquinone (0.75 mmol, 81 mg), Pd(OAc)<sub>2</sub> (0.025 mmol, 5.6 mg), 48 wt % HBF<sub>4</sub> (0.25 mmol, 32 uL), and EtOAc (1 mL), yielded the product **5l** (91mg, 97%), <sup>1</sup>H NMR (CDCl<sub>3</sub>) δ: 0.90 (t, *J* = 6.8 Hz, 3H), 0.91 (t, *J* = 7.5 Hz, 3H), 1.25-1.41 (m, 8H), 1.58-1.63 (m, 1H), 2.99 (s, 6H), 3.80 (s, 3H), 4.02 (dd, *J* = 6.0 and 11 Hz, 1H), 4.07 (dd, *J* = 5.6 and 11 Hz, 1H), 6.33 (d, *J* = 15.7 Hz, 1H), 6.47 (brs, 1H), 6.88 (dd, *J* = 2.6 and 8.7 Hz, 1H), 7.03 (d, *J* = 2.6 Hz, 1H), 7.29 (d, *J* = 8.7 Hz, 1H), 7.77 (d, *J* = 15.7 Hz, 1H). <sup>13</sup>C NMR (CDCl<sub>3</sub>) δ: 10.95, 14.02, 22.91, 23.77, 28.89, 30.38, 36.42, 38.76, 55.45, 66.88, 110.72, 116.82, 119.42, 128.18, 130.35, 130.91, 140.08, 156.63, 157.01, 167.04; HRESIMS calcd. for C<sub>21</sub>H<sub>32</sub>N<sub>2</sub>O<sub>4</sub>Na (M+Na<sup>+</sup>): 399.2260; found 399.2260.

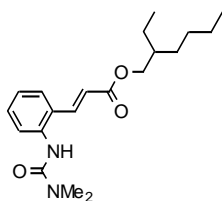

Following the general procedure above, using aryl urea **1k** (41.1 mg, 0.25 mmol), acrylate ester (43 mg, 0.5 mmol), 1,4-benzoquinone (0.75 mmol, 81 mg), Pd(OAc)<sub>2</sub> (0.025 mmol, 5.6 mg), 48 wt % HBF<sub>4</sub> (0.25 mmol, 32  $\mu$ L), and EtOAc (1 mL), yielded the product **5m** (82 mg, 95%); <sup>1</sup>H NMR (CDCl<sub>3</sub>)  $\delta$ : 0.91 (t,  $J$  = 7.2 Hz, 3H), 0.92 (t,  $J$  = 7.6 Hz, 3H), 1.25-1.45 (m, 8H), 1.61-1.66 (m, 1H), 3.07 (s, 6H), 4.08-4.16 (m, 2H), 6.27 (br s, 1H), 6.42 (d,  $J$  = 15.6 Hz, 1H), 7.12-7.16 (m, 1H), 7.34-7.39 (m, 1H), 7.53 (d,  $J$  = 7.6 Hz, 1H), 7.67 (d,  $J$  = 8.4 Hz, 1H), 7.83 (d,  $J$  = 15.6 Hz, 1H); <sup>13</sup>C NMR (CDCl<sub>3</sub>)  $\delta$ : 11.56, 14.18, 23.10, 23.97, 29.07, 30.58, 36.62, 38.96, 67.10, 119.90, 124.86, 125.41, 127.05, 127.98, 130.73, 137.84, 140.03, 156.14, 167.20; HRESIMS calcd. for C<sub>20</sub>H<sub>30</sub>N<sub>2</sub>O<sub>3</sub>Na (M+Na<sup>+</sup>): 369.2154; found 369.2162.

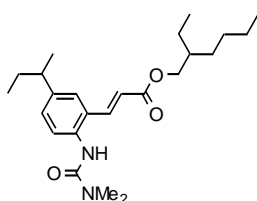

Following the general procedure above, using aryl urea **1q** (0.25 mmol), acrylate ester (0.5 mmol), 1,4-benzoquinone (0.75 mmol, 81 mg), and Pd(OAc)<sub>2</sub> (0.025 mmol, 5.6 mg), EtOAc (1.0 mL) and 48 wt % HBF<sub>4</sub> (0.25 mmol, 32  $\mu$ L) yielded the product **5n** (99 mg, 99%); <sup>1</sup>H NMR (CDCl<sub>3</sub>)  $\delta$ : 0.81 (t,  $J$  = 7.3 Hz, 3H), 0.90 (t,  $J$  = 7.0 Hz, 6H), 1.31 (d,  $J$  = 7.0 Hz, 3H), 1.41-1.43 (m, 8H), 1.54-1.62 (m, 3H), 2.57 (sext,  $J$  = 7.0 Hz, 1H), 3.01 (s, 3H), 4.04 (dd,  $J$  = 6.0 and 11.0 Hz, 1H), 4.07 (dd,  $J$  = 5.6 and 11.0 Hz, 1H), 6.38 (d,  $J$  = 15.9 Hz, 1H), 6.51 (brs, 1H), 7.16 (dd,  $J$  = 2.0 and 8.4 Hz, 1H), 7.33 (d,  $J$  = 1.9 Hz, 1H), 7.44 (d,  $J$  = 8.4 Hz, 1H), 7.83 (d,  $J$  = 15.9 Hz, 1H). <sup>13</sup>C NMR (CDCl<sub>3</sub>)  $\delta$ : 10.99, 12.17, 14.03, 21.74, 22.95, 23.77, 28.91, 30.39, 31.01, 36.45, 38.79, 41.18, 66.85, 119.20, 125.24, 125.60, 127.82, 129.46, 135.45, 140.29, 144.20, 156.17, 167.16; HRESIMS calcd. for C<sub>24</sub>H<sub>38</sub>N<sub>2</sub>O<sub>3</sub>Na (M+Na<sup>+</sup>): 425.2780; found 425.2774.

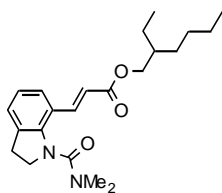

Following the general procedure above, using aryl urea **1n** (47.6 mg, 0.25 mmol), acrylate ester (43 mg, 0.5 mmol), 1,4-benzoquinone (0.75 mmol, 81 mg), Pd(OAc)<sub>2</sub> (0.025 mmol, 5.6 mg), 48

wt % HBF<sub>4</sub> (0.25 mmol, 32 uL), and EtOAc (1 mL), yielded the product **5o** (92.5 mg, 99%); <sup>1</sup>H NMR (CDCl<sub>3</sub>) δ: 0.90-0.93 (m, 6H), 1.30-1.43 (m, 8H), 1.57-1.61 (m, 1H), 3.01 (s, 6H), 3.09 (t, *J* = 8 Hz, 2H), 3.94 (t, *J* = 8 Hz, 2H), 4.02-4.12 (m, 2H), 6.33 (d, *J* = 16 Hz, 1H), 7.00 (t, *J* = 7.6 Hz, 1H), 7.19 (d, *J* = 7.2 Hz, 1H), 7.38 (d, *J* = 7.6 Hz, 1H), 7.51 (d, *J* = 16 Hz, 1H); <sup>13</sup>C NMR (CDCl<sub>3</sub>), δ: 11.15, 14.13, 23.04, 23.96, 29.05, 30.01, 30.55, 37.56, 38.93, 52.74, 66.59, 117.31, 123.62, 123.72, 125.56, 126.00, 134.30, 141.39, 144.85, 161.68, 167.39; HRESIMS calcd. for C<sub>22</sub>H<sub>32</sub>N<sub>2</sub>O<sub>3</sub>Na (M+Na<sup>+</sup>): 395.2311; found 395.2305.

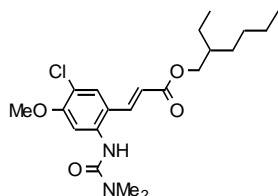

Following the general procedure above, using aryl urea **1o** (57.2 mg, 0.25 mmol), acrylate ester (43 mg, 0.5 mmol), 1,4-benzoquinone (0.75 mmol, 81 mg), Pd(OAc)<sub>2</sub> (0.025 mmol, 5.6 mg), 48 wt % HBF<sub>4</sub> (0.25 mmol, 32 uL), and EtOAc (1 mL), yielded the product **5p** (91.2 mg, 89%); <sup>1</sup>H NMR (acetone-d<sub>6</sub>) δ: 0.88-0.94 (m, 6H), 1.31-1.42 (m, 8H), 1.61-1.65 (m, 1H), 3.08 (s, 6H), 3.93 (s, 3H), 4.08-4.14 (m, 2H), 6.32 (d, *J* = 16 Hz, 1H), 6.43 (brs, 1H), 7.52 (s, 1H), 7.59 (s, 1H), 7.68 (d, *J* = 16 Hz, 1H); <sup>13</sup>C NMR (acetone-d<sub>6</sub>), δ: 11.14, 14.19, 23.11, 23.95, 29.07, 30.57, 36.66, 38.97, 56.41, 67.16, 107.91, 118.45, 118.51, 119.74, 128.01, 137.97, 155.64, 156.65, 167.24; HRESIMS calcd. for C<sub>21</sub>H<sub>31</sub>N<sub>2</sub>O<sub>4</sub>NaCl (M+Na<sup>+</sup>): 433.1870; found 433.1870.

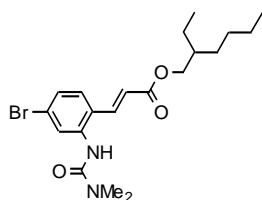

Following the general procedure above, using aryl urea **1p** (61 mg, 0.25 mmol), acrylate ester (43 mg, 0.5 mmol), 1,4-benzoquinone (0.75 mmol, 81 mg), Pd(OAc)<sub>2</sub> (0.025 mmol, 5.6 mg), 48 wt % HBF<sub>4</sub> (0.25 mmol, 32 uL), and EtOAc (1 mL), yielded the product **5q** (88.7 mg, 83%); <sup>1</sup>H NMR (acetone-d<sub>6</sub>) δ: 0.88-0.94 (m, 6H), 1.30-1.42 (m, 8H), 1.61-1.65 (m, 1H), 3.06 (s, 6H), 4.08-4.14 (m, 2H), 6.33 (brs, 1H), 6.39 (d, *J* = 16 Hz, 1H), 7.24 (dd, *J* = 1.6 and 8.4 Hz, 1H), 7.36 (d, *J* = 8.4 Hz, 1H), 7.71 (d, *J* = 16 Hz, 1H), 7.95 (d, *J* = 1.6 Hz, 1H); <sup>13</sup>C NMR (acetone-d<sub>6</sub>), δ: 11.17, 14.21, 23.12, 23.97, 29.09, 30.58, 36.65, 38.96, 67.26, 120.38, 124.51, 126.41, 127.80, 127.85, 128.17, 138.83, 138.92, 155.65, 166.99; HRESIMS calcd. for C<sub>20</sub>H<sub>29</sub>N<sub>2</sub>O<sub>3</sub>NaBr (M+Na<sup>+</sup>): 447.1259; found 427.1255.

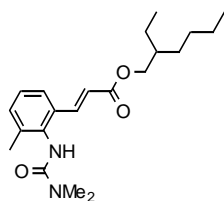

Following the general procedure above, using aryl urea **1l** (44.6 mg, 0.25 mmol), acrylate ester (43 mg, 0.5 mmol), 1,4-benzoquinone (0.75 mmol, 81 mg), Pd(OAc)<sub>2</sub> (0.025 mmol, 5.6 mg), 48 wt % HBF<sub>4</sub> (0.25 mmol, 32 uL), and EtOAc (1 mL), yielded the product **5r** (78.3 mg, 87%); <sup>1</sup>H NMR (CDCl<sub>3</sub>) δ: 0.89-0.94 (m, 6H), 1.31-1.43 (m, 8H), 1.61-1.64 (m, 1H), 3.07 (s, 6H), 4.06-4.14 (m, 2H), 5.85 (brs, 1H), 6.40 (d, *J* = 16.5 Hz, 1H), 7.18 (t, *J* = 7.5 Hz, 1H), 7.26 (d, *J* = 7.5 Hz, 1H), 7.50 (d, *J* = 7.5 Hz, 1H), 7.88 (d, *J* = 16.5 Hz, 1H); <sup>13</sup>C NMR (CDCl<sub>3</sub>) δ: 11.15, 14.18, 18.37, 23.09, 23.96, 29.06, 30.55, 36.64, 38.94, 66.89, 119.16, 124.45, 126.76, 132.38, 132.58, 136.41, 136.77, 141.27, 156.60, 167.45; HRESIMS calcd. for C<sub>21</sub>H<sub>32</sub>N<sub>2</sub>O<sub>3</sub>Na (M+Na<sup>+</sup>): 383.2311; found 383.2309.

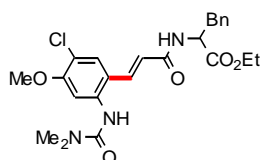

Following the general procedure above, using aryl urea **1o** (57.2 mg, 0.25 mmol), acrylamide (123 mg, 0.5 mmol), 1,4-benzoquinone (0.75 mmol, 81 mg), Pd(OAc)<sub>2</sub> (0.025 mmol, 5.6 mg), 48 wt % HBF<sub>4</sub> (0.25 mmol, 32 uL), and EtOAc (1 mL), yielded the product **5s** (84 mg, 71%); <sup>1</sup>H NMR (CDCl<sub>3</sub>) δ: 1.22 (t, *J* = 7.1 Hz, 3H), 3.02 (s, 6H), 3.05-3.08 (m, 2H), 3.86 (s, 3H), 4.14 (q, *J* = 7.1 Hz, 2H), 4.70-4.76 (m, 1H), 6.11 (dd, *J* = 8.6 and 15.3 Hz, 1H), 6.51 (dd, *J* = 7.8 and 11.8 Hz, 1H), 7.09-7.14 (m, 3H), 7.20-7.28 (m, 3H), 7.35 (d, *J* = 6.5 Hz, 1H), 7.59 (d, *J* = 15.3 Hz, 1H); <sup>13</sup>C NMR (CDCl<sub>3</sub>) δ: 14.31, 36.77, 38.18, 53.73, 56.48, 61.84, 108.30, 108.31, 108.32, 118.22, 120.02, 127.35, 127.59, 128.78, 129.52, 135.35, 136.12, 138.14, 155.95, 156.33, 165.43, 171.78, 171.80; HRESIMS calcd. for C<sub>24</sub>H<sub>28</sub>N<sub>3</sub>O<sub>5</sub>ClNa (M+Na<sup>+</sup>): 496.1615; found 496.1620.

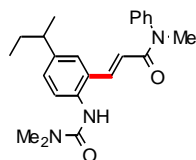

Following the general procedure above, using aryl urea **1q** (0.25 mmol), acrylamide (81 mg, 0.5 mmol), 1,4-benzoquinone (0.75 mmol, 81 mg), and Pd(OAc)<sub>2</sub> (0.025 mmol, 5.6 mg), EtOAc (1.0 mL) and 48 wt % HBF<sub>4</sub> (0.25 mmol, 32 uL) yielded the product **5t** (49 mg, 52%); <sup>1</sup>H NMR (CDCl<sub>3</sub>) δ: 0.73 (t, *J* = 7.4 Hz, 3H), 1.10 (d, *J* = 7.4 Hz, 3H), 1.43-1.50 (m, 2H), 2.40-2.49 (m, 1H), 3.03 (s, 6H), 3.31 (s, 3H), 6.26 (d, *J* = 15.3 Hz, 1H), 6.59 (brs, 1H), 6.91 (brs, 1H), 7.10 (dd, *J* = 2.0 and 8.4 Hz, 1H), 7.17 (dd, *J* = 1.5 and 6.9 Hz, 2H), 7.34-7.44 (m, 3H), 7.54 (d, *J* = 8.4 Hz, 1H), 7.83 (d, *J* =

15.3 Hz, 1H).  $^{13}\text{C}$  NMR ( $\text{CDCl}_3$ )  $\delta$ : 12.33, 21.88, 31.15, 36.76, 37.63, 41.20, 120.31, 125.36, 125.61, 127.47, 127.82, 127.92, 128.93, 129.78, 135.62, 137.66, 143.63, 143.73, 156.32, 166.28; HRESIMS calcd. for  $\text{C}_{23}\text{H}_{29}\text{N}_3\text{O}_2\text{Na}$  ( $\text{M}+\text{Na}^+$ ): 402.2157; found 402.2159.

## V. The synthesis of boscalid

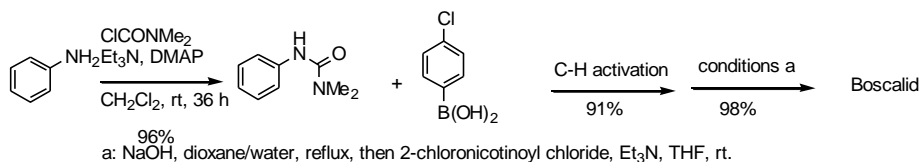

### C–H Suzuki–Miyaura (1st step):

Following the general procedure **C**, using arylurea (82 mg, 0.5 mmol), *p*-ClPhB(OH)<sub>2</sub> (156 mg, 1.0 mmol), BQ (1.5 mmol, 162 mg), and [Pd(MeCN)<sub>4</sub>](BF<sub>4</sub>)<sub>2</sub> (0.05 mmol, 22 mg), EtOAc (2.0 mL), yielded the product (125 mg, 91%);  $^1\text{H}$  NMR ( $\text{CDCl}_3$ )  $\delta$ : 2.83 (s, 6H), 6.35 (brs, 1H), 7.09 (dt,  $J$  = 1.2 and 7.5 Hz, 1H), 7.16 (dd,  $J$  = 1.5 and 7.6 Hz, 1H), 7.32–7.37 (m, 3H), 7.45 (d,  $J$  = 8.4 Hz, 2H), 7.45 (dd,  $J$  = 1.2 and 8.4 Hz, 1H).  $^{13}\text{C}$  NMR ( $\text{CDCl}_3$ )  $\delta$ : 36.22, 121.21, 122.95, 128.71, 129.19, 129.61, 130.52, 130.62, 133.83, 136.09, 137.13, 155.42; HRESIMS calcd. for  $\text{C}_{15}\text{H}_{15}\text{N}_2\text{ONa}$  ( $\text{M}+\text{Na}^+$ ): 297.0771; found 297.0773.

### Deprotection and 2-chloronicotinoylation (2nd step):

The resulting product (119 mg, 0.43 mmol) from 1st step shown in above was mixed with KOH (364 mg, 6.5 mmol) in 1,4-dioxane/water (1.6 mL/0.8 mL). After stirring under reflux conditions for 20 h, the solution obtained was filtered through the plug of silica gel and anhydrous  $\text{MgSO}_4$ . After evaporation to remove solvents, the crude oil, 2-chloronicotinoyl chloride and (122 mg, 0.69 mmol) were sequentially added under air to a reaction tube equipped with a stir bar and a septum. THF (5 mL), and  $\text{Et}_3\text{N}$  (1.39 mmol, 0.19 mL) was added by syringe and the resulting mixture vigorously stirred for 2 h at ambient temperature. After this time, the contents of the flask were quenched with aqueous  $\text{K}_2\text{CO}_3$  and extracted with EtOAc. The solution obtained was filtered through the plug of silica gel and anhydrous  $\text{MgSO}_4$ , and then concentrated by rotary evaporation. The residue was purified by flash chromatography, eluting with hexane/EtOAc to afford Boscalid (145 mg, 98%);  $^1\text{H}$  NMR ( $\text{CDCl}_3$ )  $\delta$ : 7.27 (brs, 1H), 7.33–7.37 (m, 4H), 7.42–7.48 (m, 3H), 8.14 (dd,  $J$  = 1.9 and 7.8 Hz, 2H), 8.41 (d,  $J$  = 8.2 Hz, 1H), 8.45 (dd,  $J$  = 1.9 and 4.7 Hz, 1H).  $^{13}\text{C}$  NMR ( $\text{CDCl}_3$ )  $\delta$ : 122.55, 122.91, 125.56, 128.91, 129.27, 130.33, 130.86, 131.25, 132.61, 134.28, 134.35, 136.39, 139.89, 146.73, 151.21, 162.75; HRESIMS calcd. for  $\text{C}_{18}\text{H}_{12}\text{N}_2\text{ONa}$  ( $\text{M}+\text{Na}^+$ ): 365.0224; found 365.0216.

## VI. Mechanistic studies

### Palladacycle 6

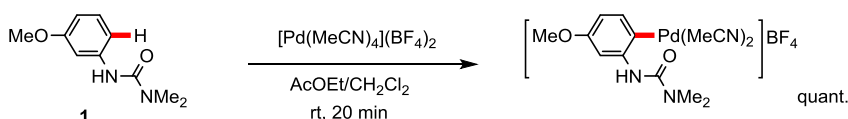

Arylurea **1** (0.1 or 0.11 mmol), and  $[\text{Pd}(\text{MeCN})_4](\text{BF}_4)_2$  (0.1 mmol) were sequentially added under Ar to a reaction tube equipped with a stir bar and a septum. EtOAc (6 mL, or EtOAc/ $\text{CH}_2\text{Cl}_2$ ) was added by syringe and the resulting mixture stirred for 0.5 h at ambient temperature. To complete the reaction, we heat the reaction mixture at 40 °C for 0.5 h. The resulting crystals were filtered off and washed with EtOAc and  $\text{Et}_2\text{O}$  followed by dried under vacuum to give yellow crystals. Single crystals were obtained by the recrystallization from MeCN/toluene.;  $^1\text{H}$  NMR (acetone- $d_6$ )  $\delta$ : 2.61 (s, 3H), 3.12 (brs, 9H), 3.72 (s, 3H), 6.42 (dd,  $J = 2.8$  and 8.7 Hz, 1H), 6.67 (d,  $J = 2.8$  Hz, 1H), 6.97 (d,  $J = 8.7$  Hz, 1H), 8.74 (brs, 1H).  $^{13}\text{C}$  NMR (acetone- $d_6$ )  $\delta$ : 2.46, 36.94, 54.87, 102.37, 104.30, 109.16, 122.59, 135.50, 135.59, 136.63, 154.72, 158.97.  $^{19}\text{F}$  NMR (acetone- $d_6$ )  $\delta$ : -88.768.  $^{11}\text{B}$  NMR (acetone- $d_6$ )  $\delta$ : 4.362; ESI/TOF  $\text{C}_{14}\text{H}_{19}\text{BF}_4\text{N}_4\text{O}_2\text{Pd}$  ( $\text{M}^+ - \text{BF}_4$ ): 381.06.

### palladacycle from $\text{Pd}(\text{OAc})_2$

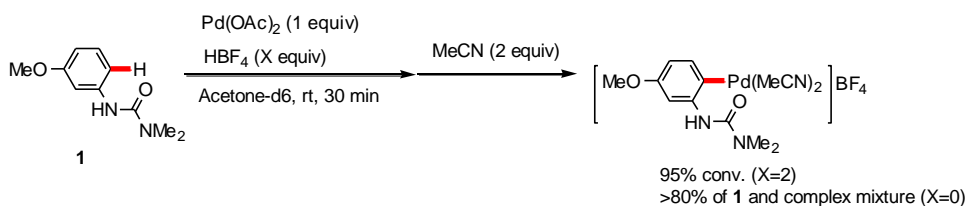

Arylurea **1** (0.05 mmol), and  $\text{Pd}(\text{OAc})_2$  (0.05 mmol) were sequentially added under Ar to a reaction tube equipped with a stir bar and a septum. Acetone- $d_6$  (1.0 mL), and 48 wt %  $\text{HBF}_4$  (0.1 mmol) was added by syringe and the resulting mixture vigorously stirred for 0.5 h at ambient temperature. After this time, MeCN (0.1 mmol) was added and  $^1\text{H}$  NMR was carried out to check the structure. The spectrum of the product was matched with the palladacycle shown in above. On the other hand, the reaction without  $\text{HBF}_4$  gave no product.

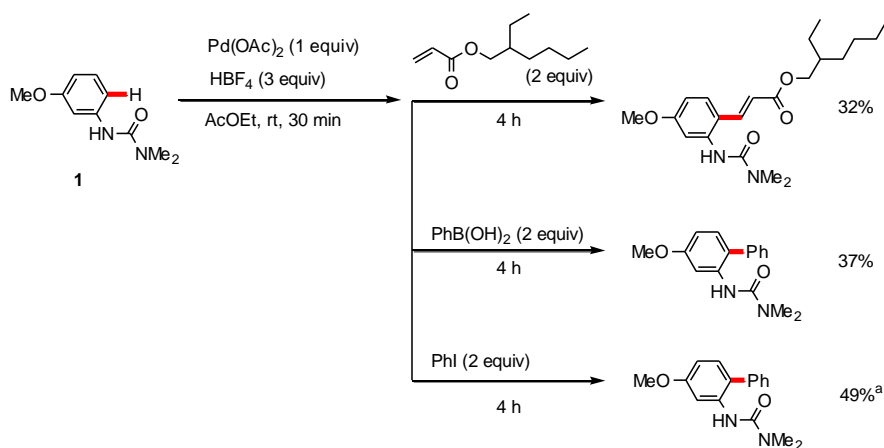

<sup>a</sup>2% Brij 35 was used instead of AcOEt.



Arylurea **1** (0.05 mmol), and Pd(OAc)<sub>2</sub> (0.05 mmol) were sequentially added under Ar to a reaction tube equipped with a stir bar and a septum. EtOAc (1.0 mL), and 48 wt % HBF<sub>4</sub> (0.15 mmol) was added by syringe and the resulting mixture vigorously stirred for 0.5 h at ambient temperature. After this time, acrylate ester, phenylboronic acid, or iodobenzene (0.1 mmol) was added. After stirring 4 h, the contents of the flask were quenched with aqueous K<sub>2</sub>CO<sub>3</sub> and extracted with EtOAc. The solution obtained was filtered through the plug of silica gel and anhydrous MgSO<sub>4</sub>, and then concentrated by rotary evaporation and dried under vacuum. <sup>1</sup>H NMR was carried out to check the yields.

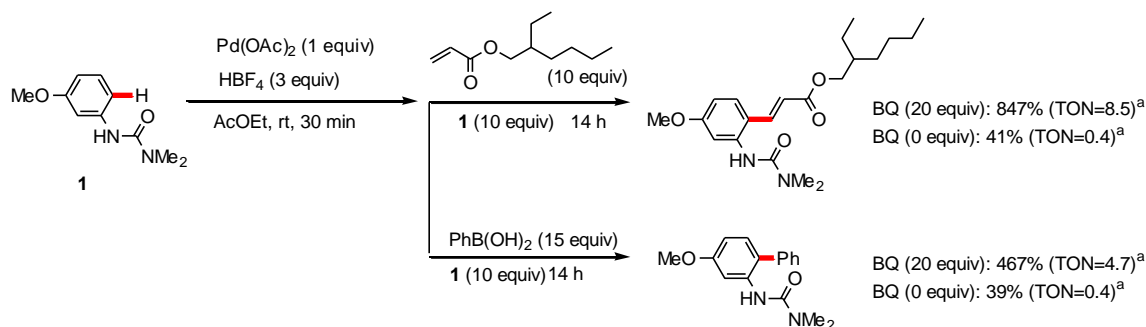

<sup>a</sup>Yields were based on Pd.

Arylurea **1** (0.05 mmol), and Pd(OAc)<sub>2</sub> (0.05 mmol) were sequentially added under Ar to a reaction tube equipped with a stir bar and a septum. EtOAc (1.0 mL), and 48 wt % HBF<sub>4</sub> (0.15 mmol) was added by syringe and the resulting mixture vigorously stirred for 0.5 h at ambient temperature. After this time, acrylate ester, or phenylboronic acid (0.5 mmol) and BQ (0 or 1 mmol) and **1** (0.5 mmol) were added. After stirring 14 h, the contents of the flask were quenched with aqueous K<sub>2</sub>CO<sub>3</sub> and extracted with EtOAc. The solution obtained was filtered through the plug of silica gel and anhydrous MgSO<sub>4</sub>, and then concentrated by rotary evaporation and dried under vacuum. <sup>1</sup>H NMR was carried out to check the yields.

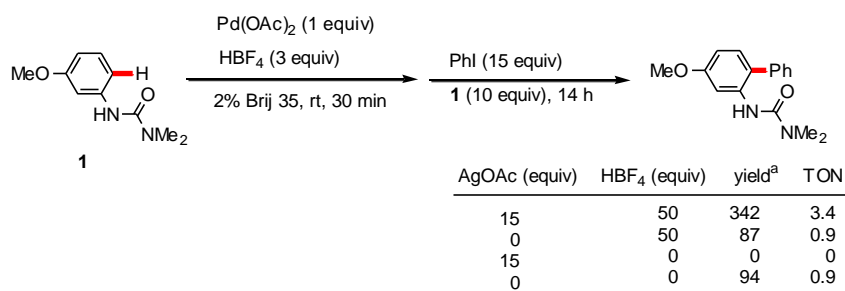

<sup>a</sup>Yields were based on Pd.

Arylurea **1** (0.05 mmol), and Pd(OAc)<sub>2</sub> (0.05 mmol) were sequentially added under Ar to a reaction tube equipped with a stir bar and a septum. EtOAc (1.0 mL), and 48 wt % HBF<sub>4</sub> (0.15 mmol) was added by syringe and the resulting mixture vigorously stirred for 0.5 h at ambient temperature. After this time, iodobenzene (0.75 mmol), **1** (0.5 mmol), HBF<sub>4</sub> (0 or 2.5 mmol) and

AgOAc (0 or 0.75 mmol) were added. After stirring 14 h, the contents of the flask were quenched with aqueous  $K_2CO_3$  and extracted with EtOAc. The solution obtained was filtered through the plug of silica gel and anhydrous  $MgSO_4$ , and then concentrated by rotary evaporation and dried under vacuum.  $^1H$  NMR was carried out to check the yields.

#### Reference

1. Houlden, C. E.; Bailey, C. D.; Ford, J. G.; Gagné, M. R.; Lloyd-Jones, G. C.; Booker-Milburn, K. I. *J. Am. Chem. Soc.* **2008**, *130*, 10066-10067.
2. Kathiravan, S.; Nicholls, I. A. *Chem. Commun.*, **2014**, *50*, 14964-14967.
3. Nishikata, T.; Abela, A. R.; Lipshutz, B. H. *Angew. Chem., Int. Ed.* **2010**, *49*, 781-784.
4. Nishikata, T.; Abela, A. R.; Huanf, S.; Lipshutz, B. H. *J. Am. Chem. Soc.* **2010**, *132*, 4978-4979.
5. Nishikata, T.; Lipshutz, B. H. *Org. Lett.* **2010**, *12*, 1972-1975

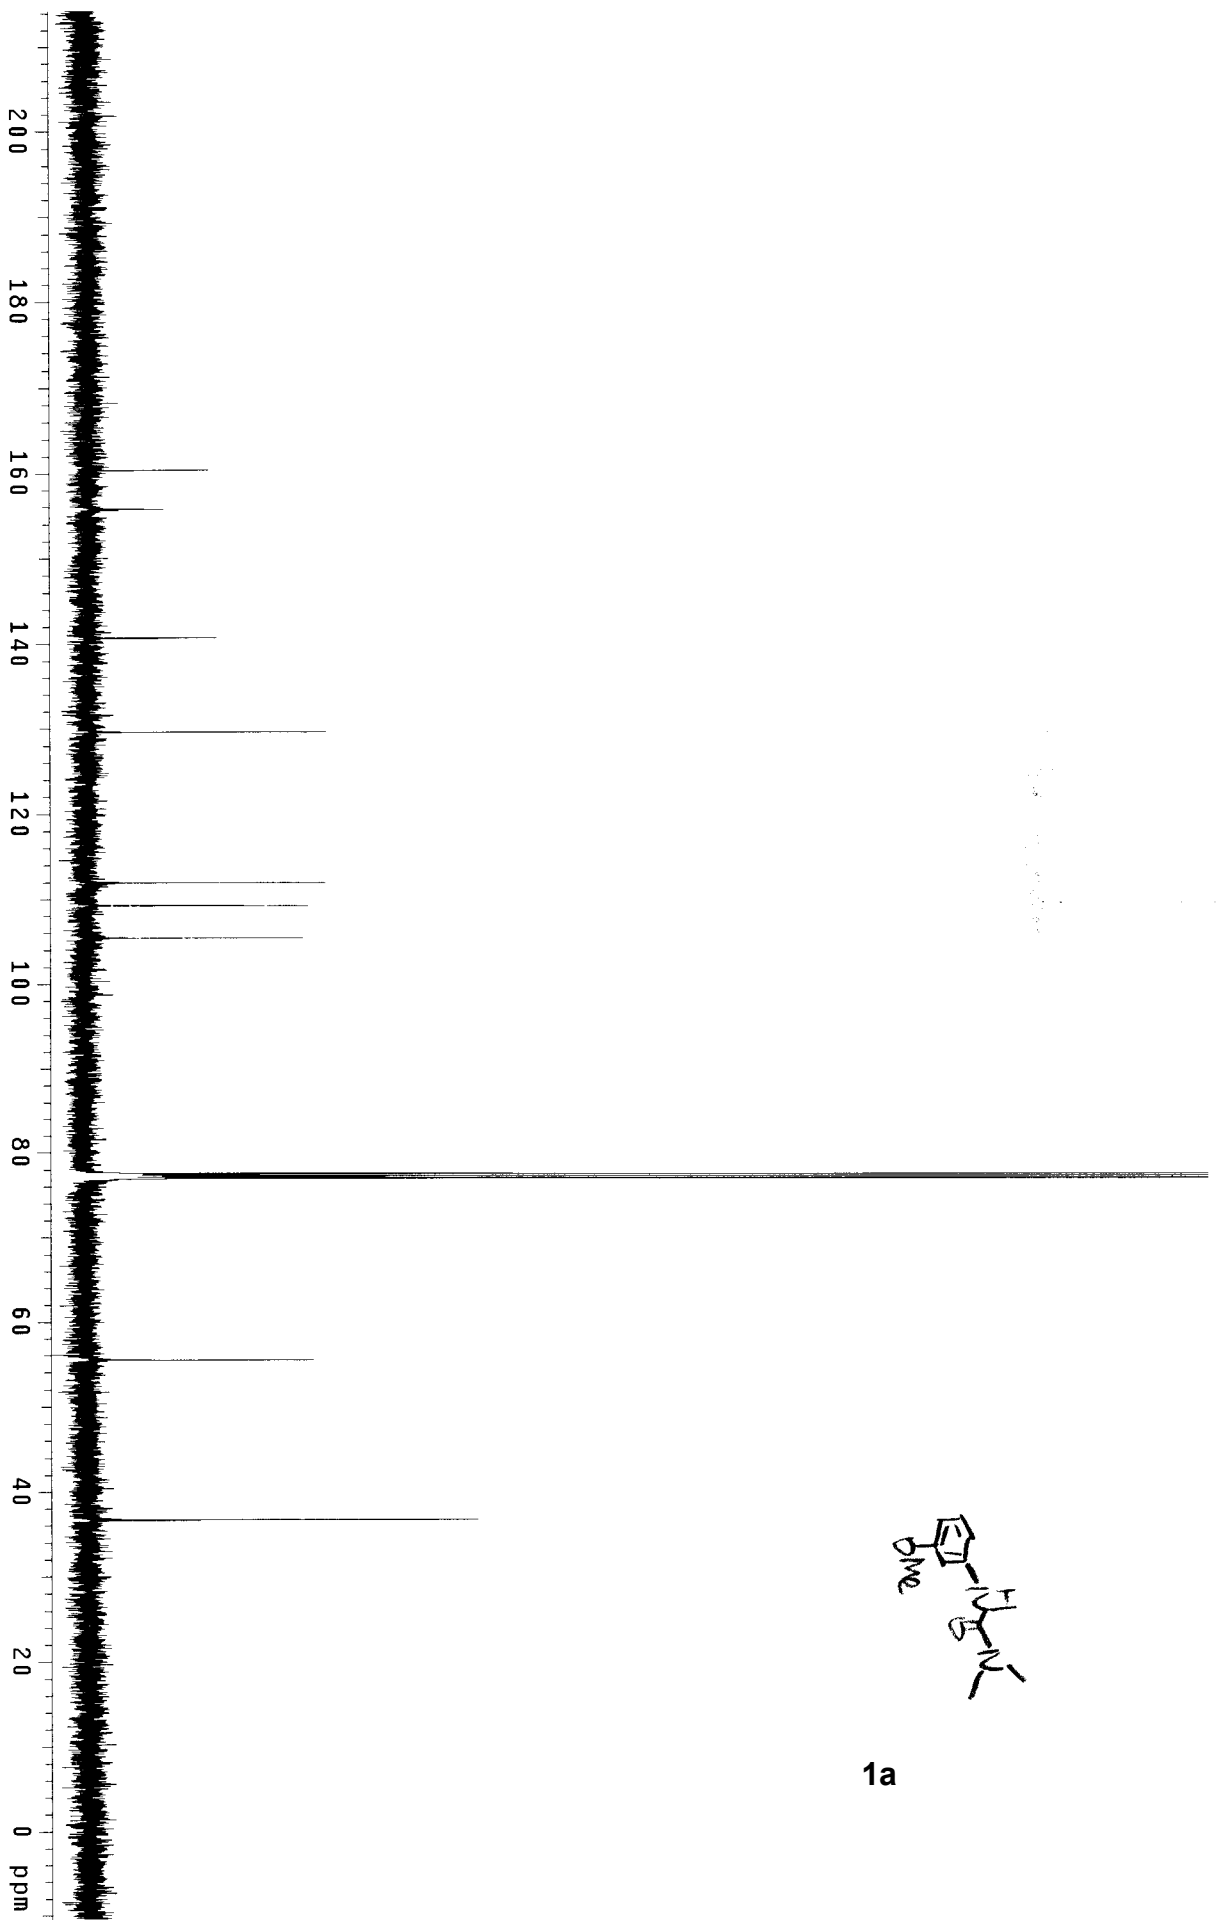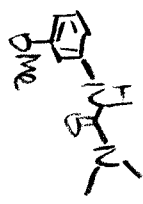

1a

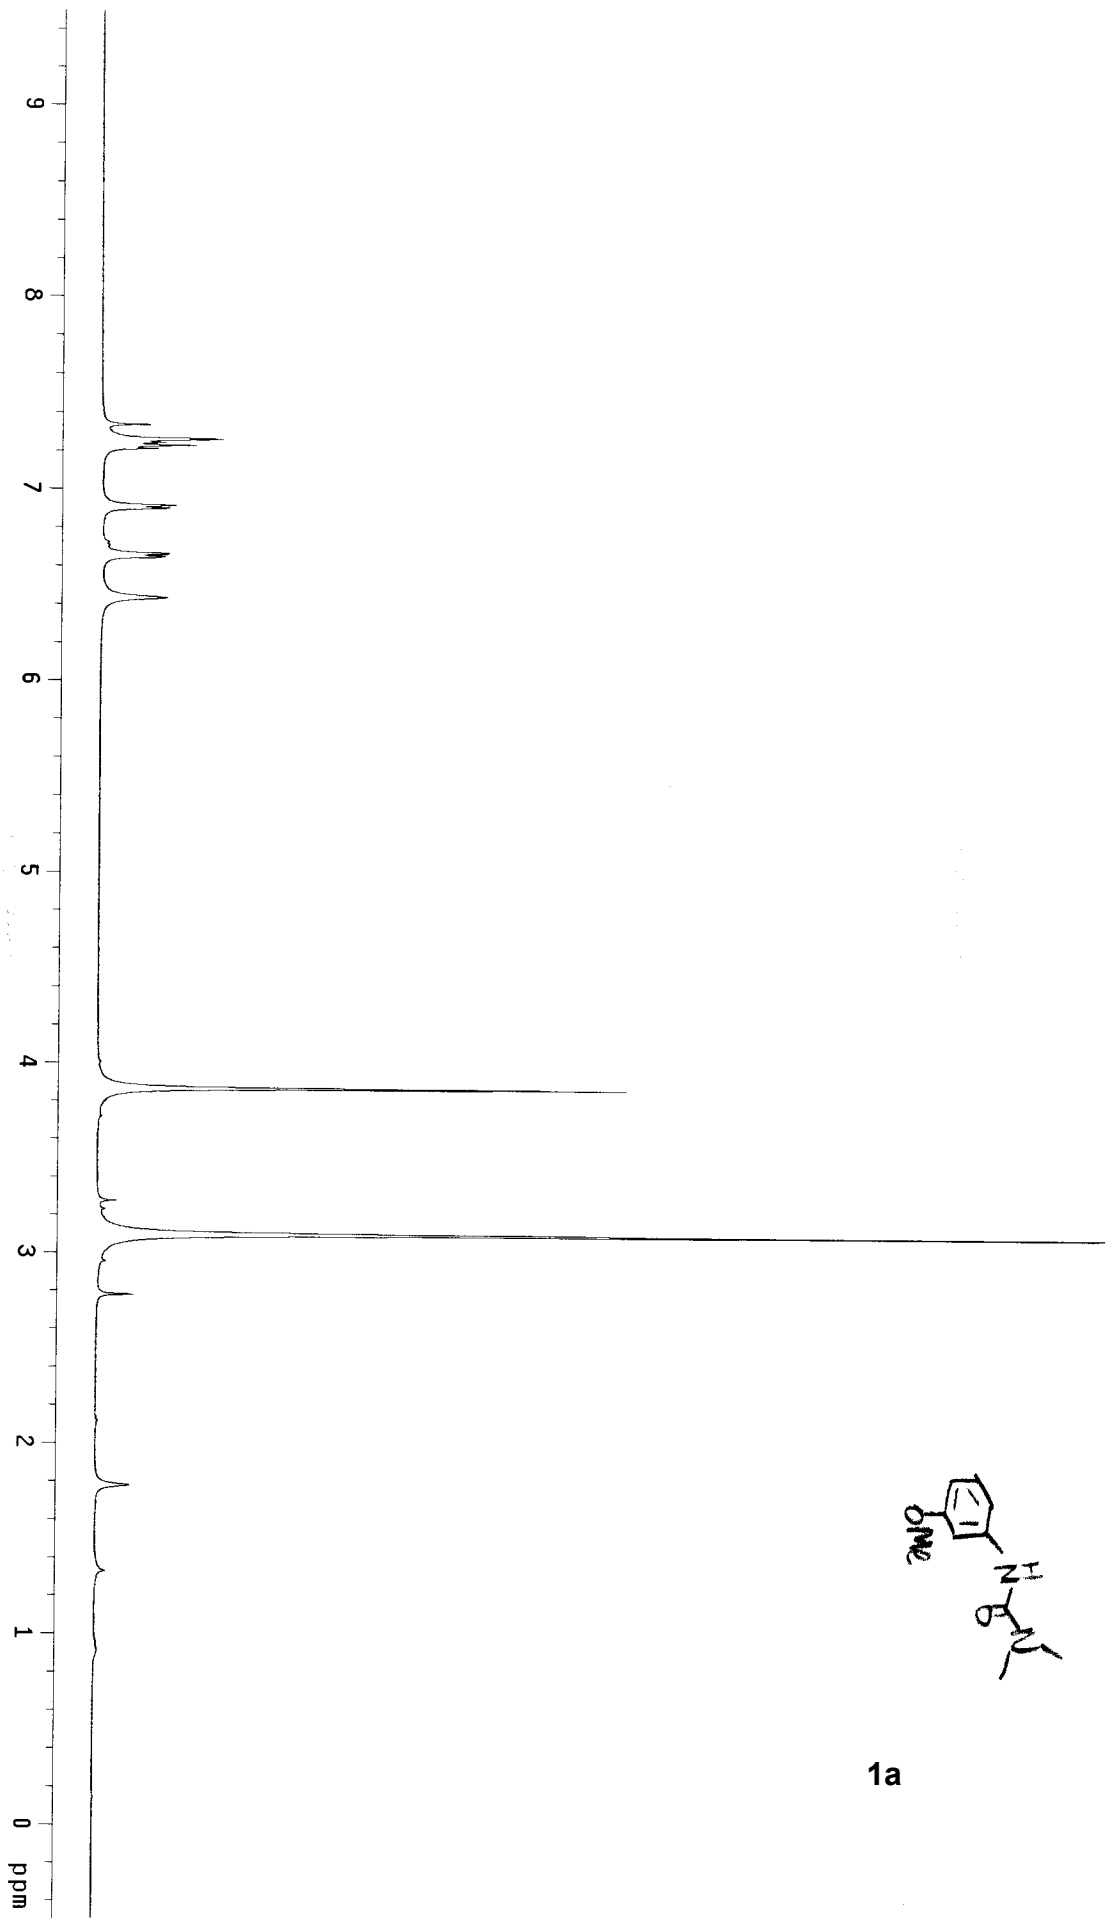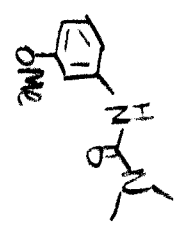

1a

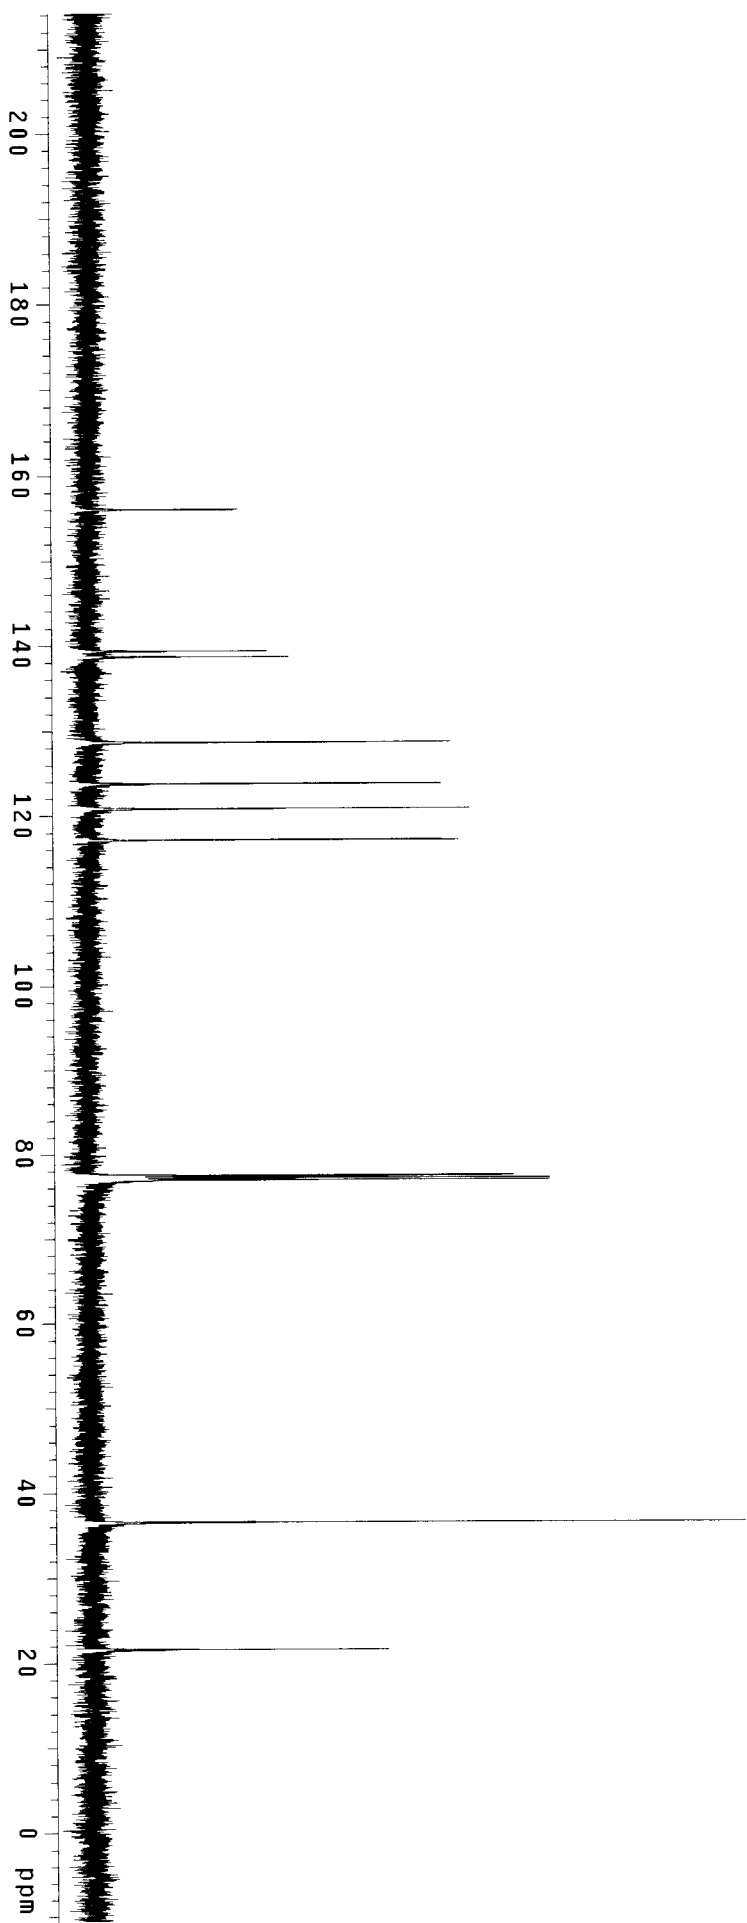

1b

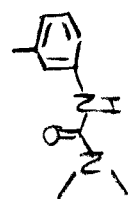

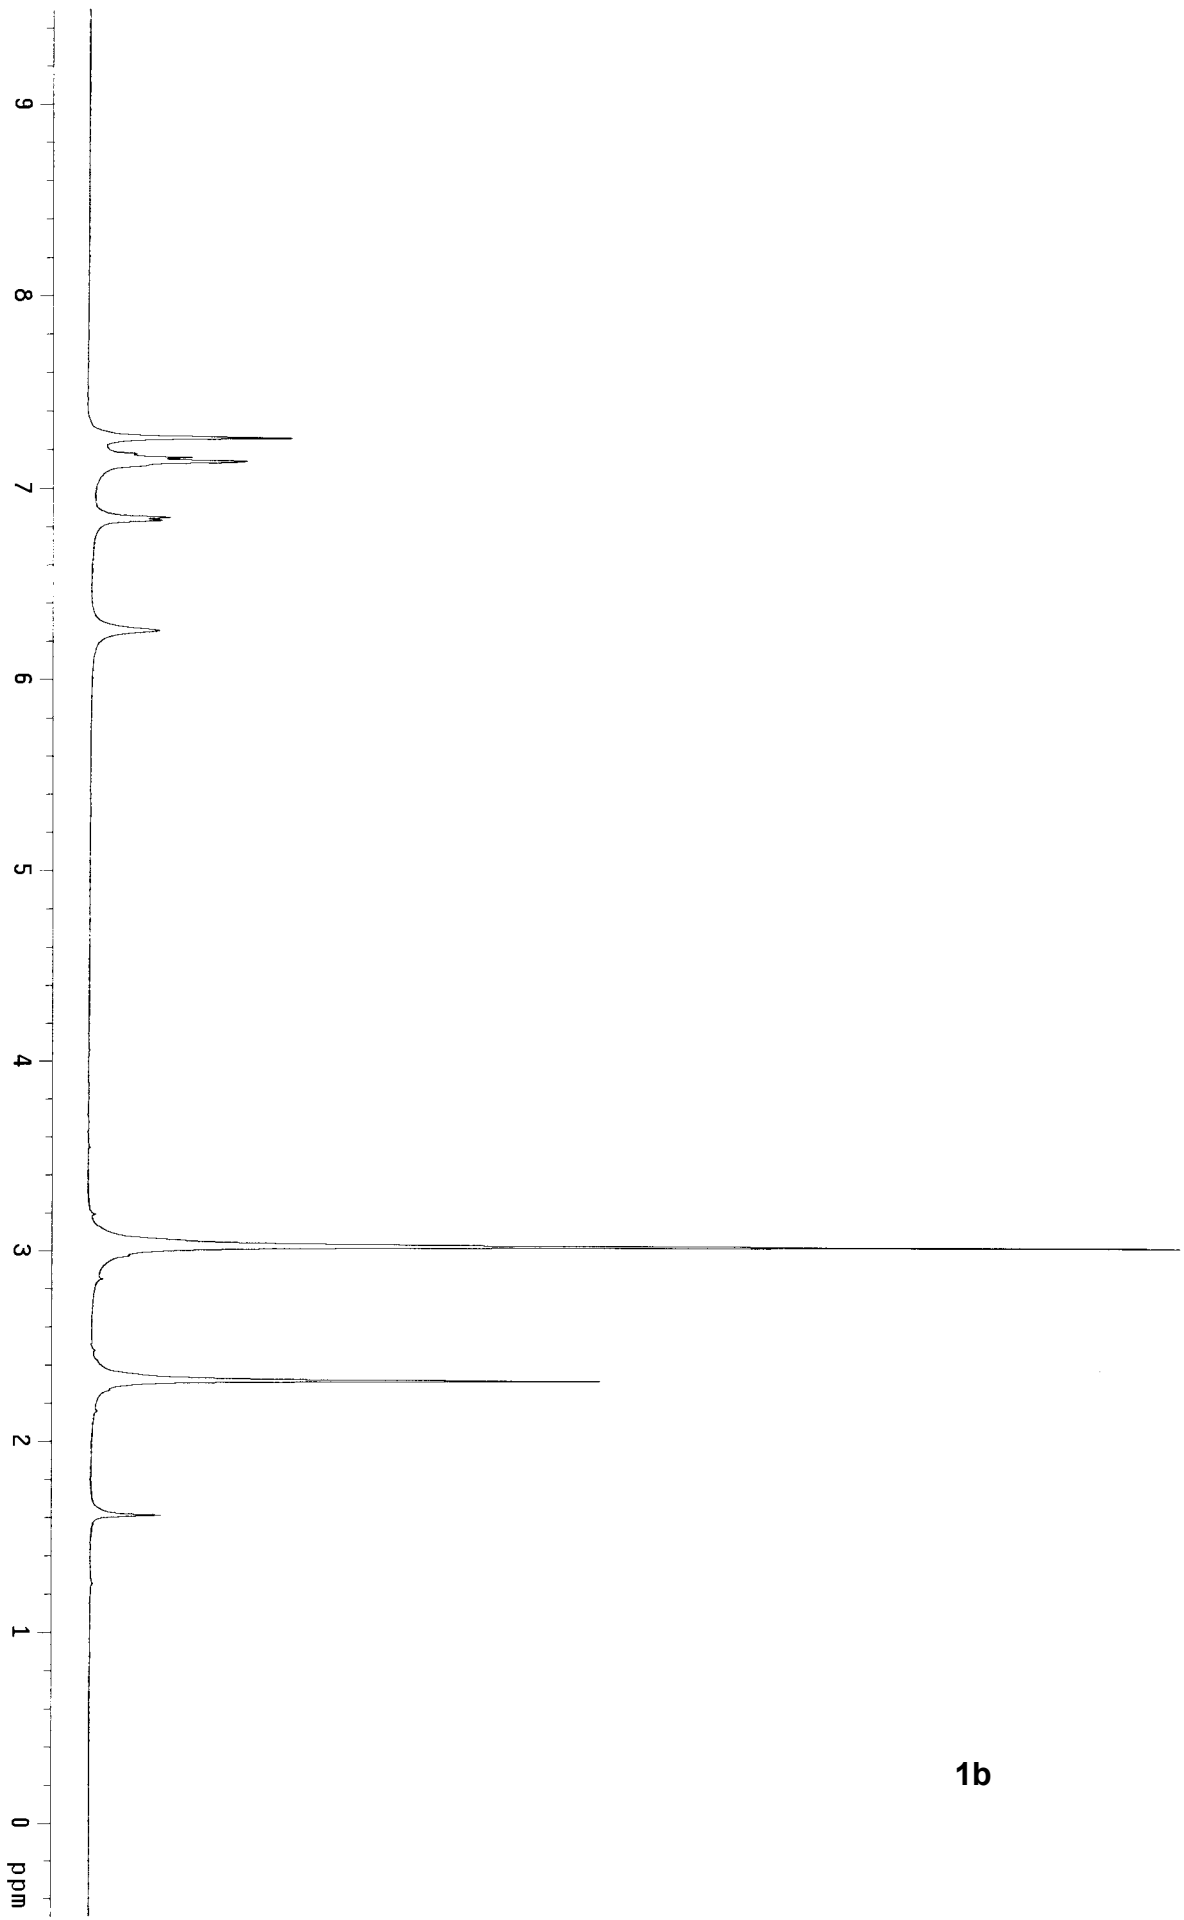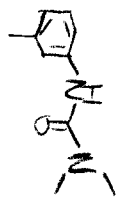

1b

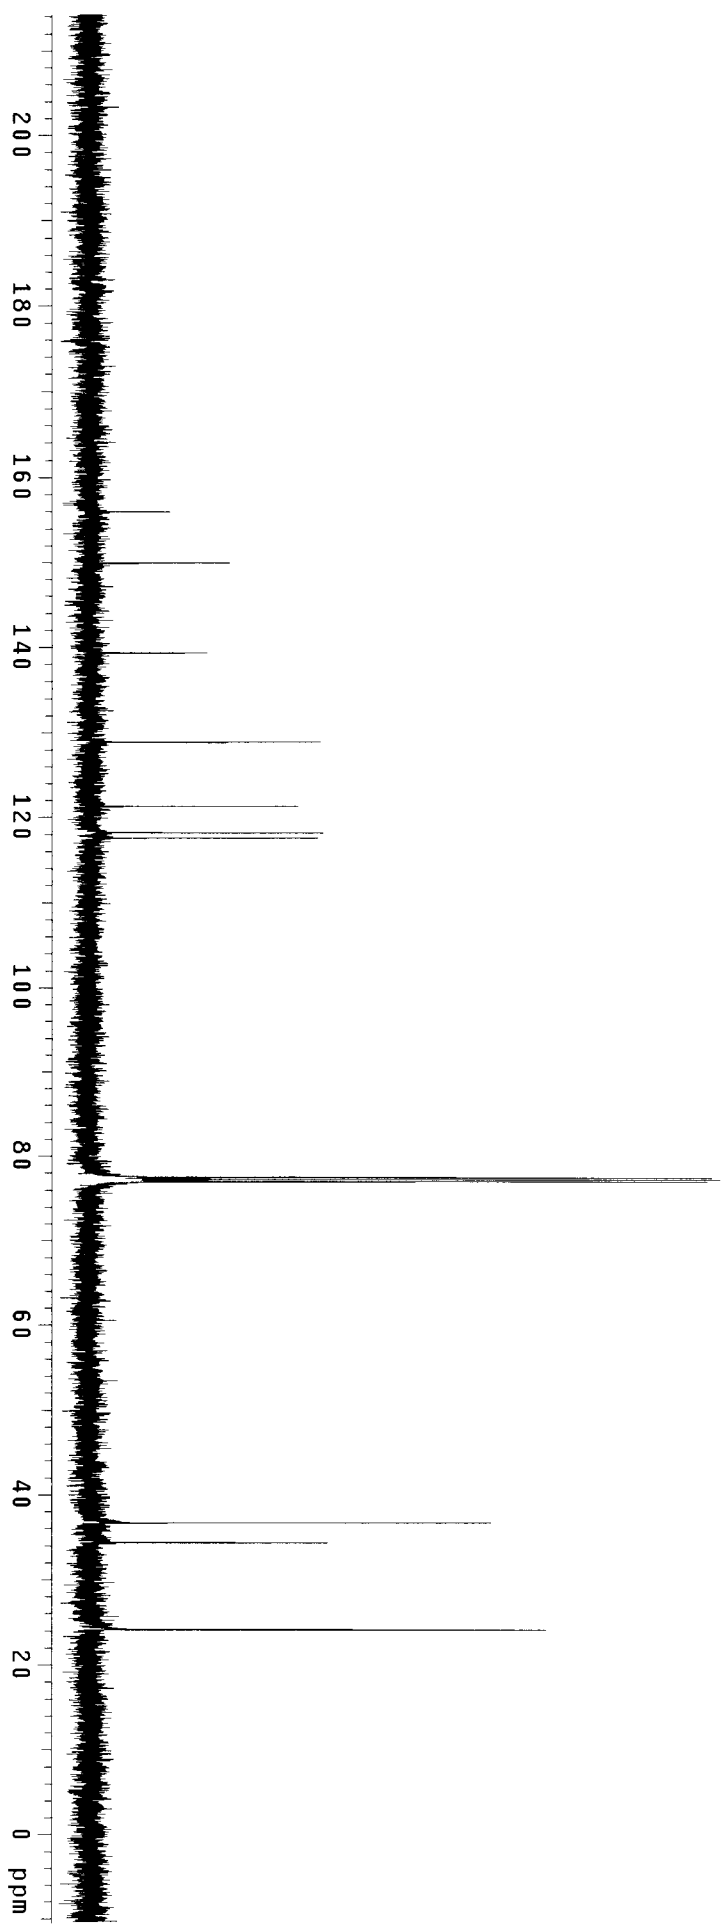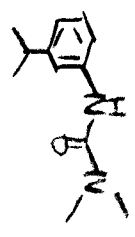

1c

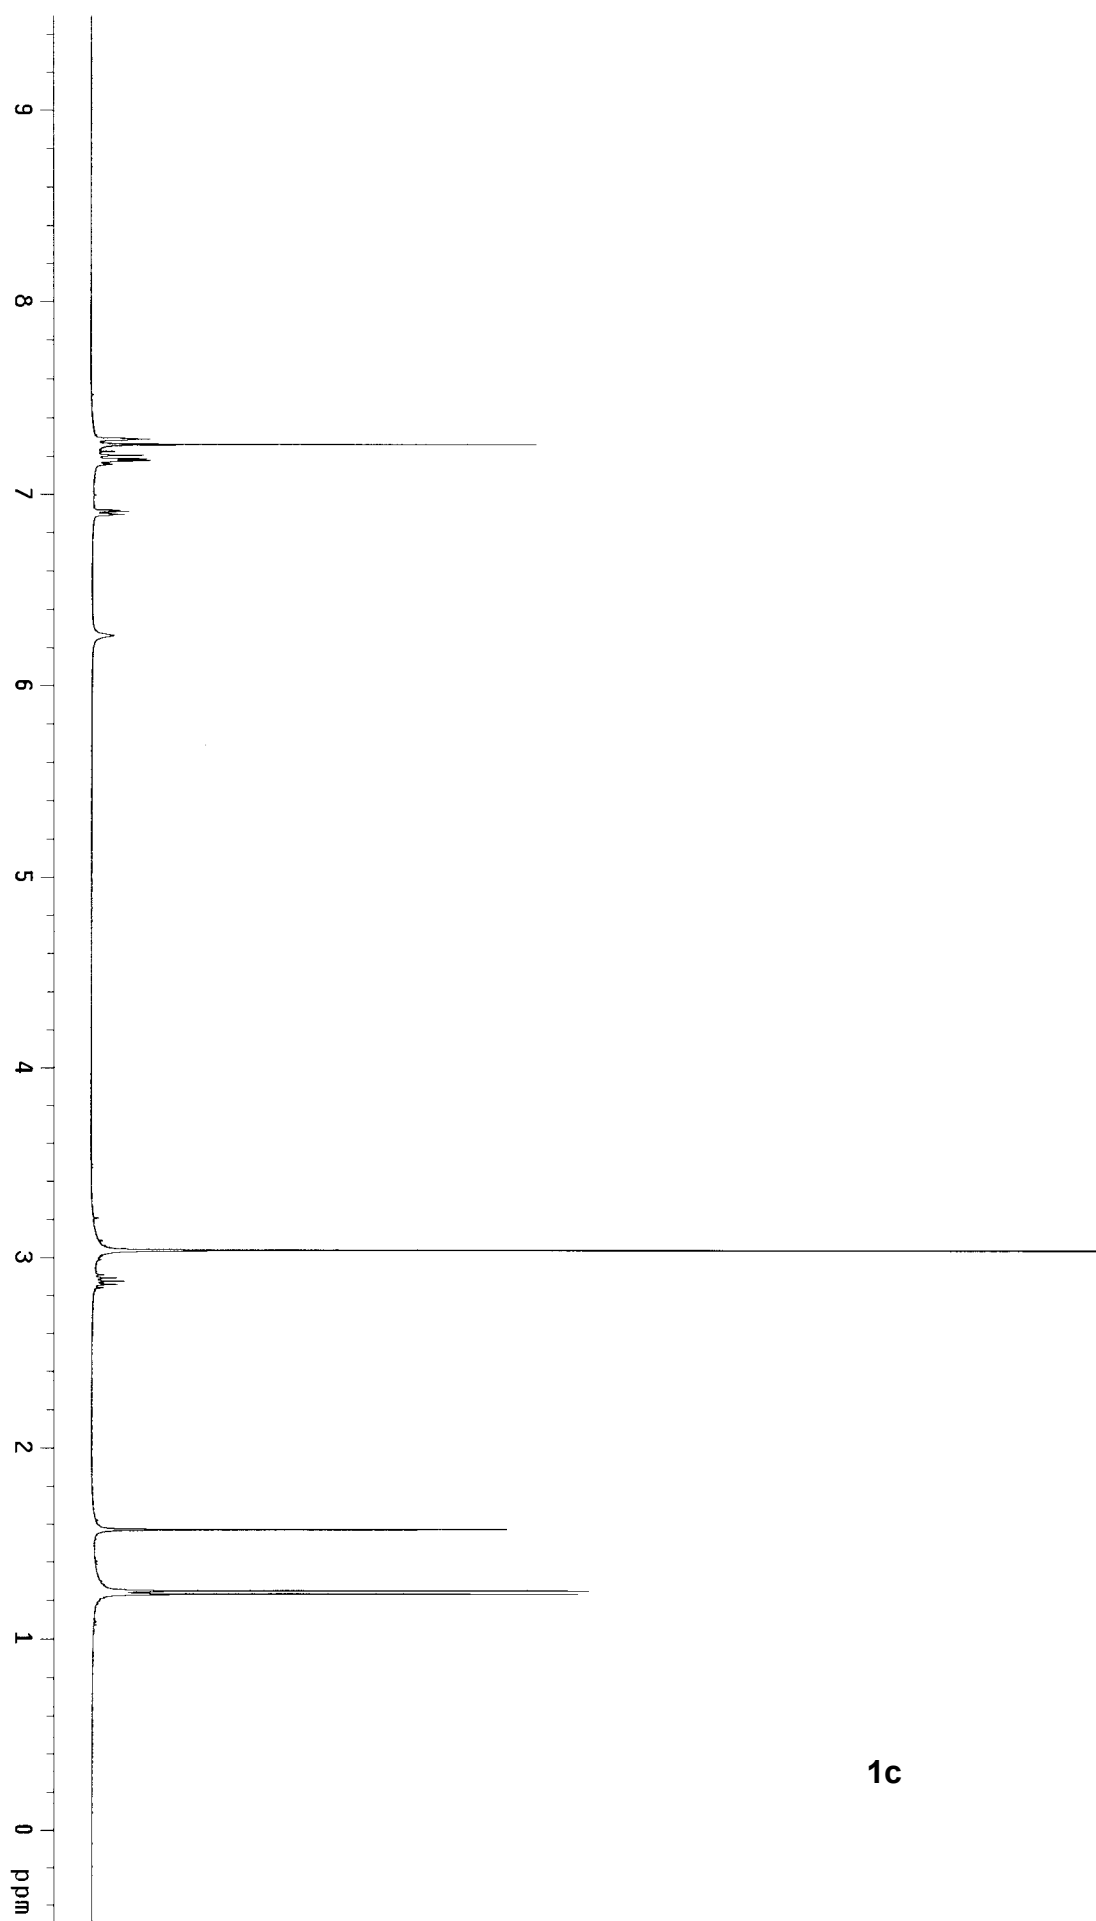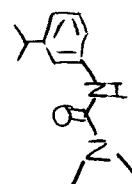

1c



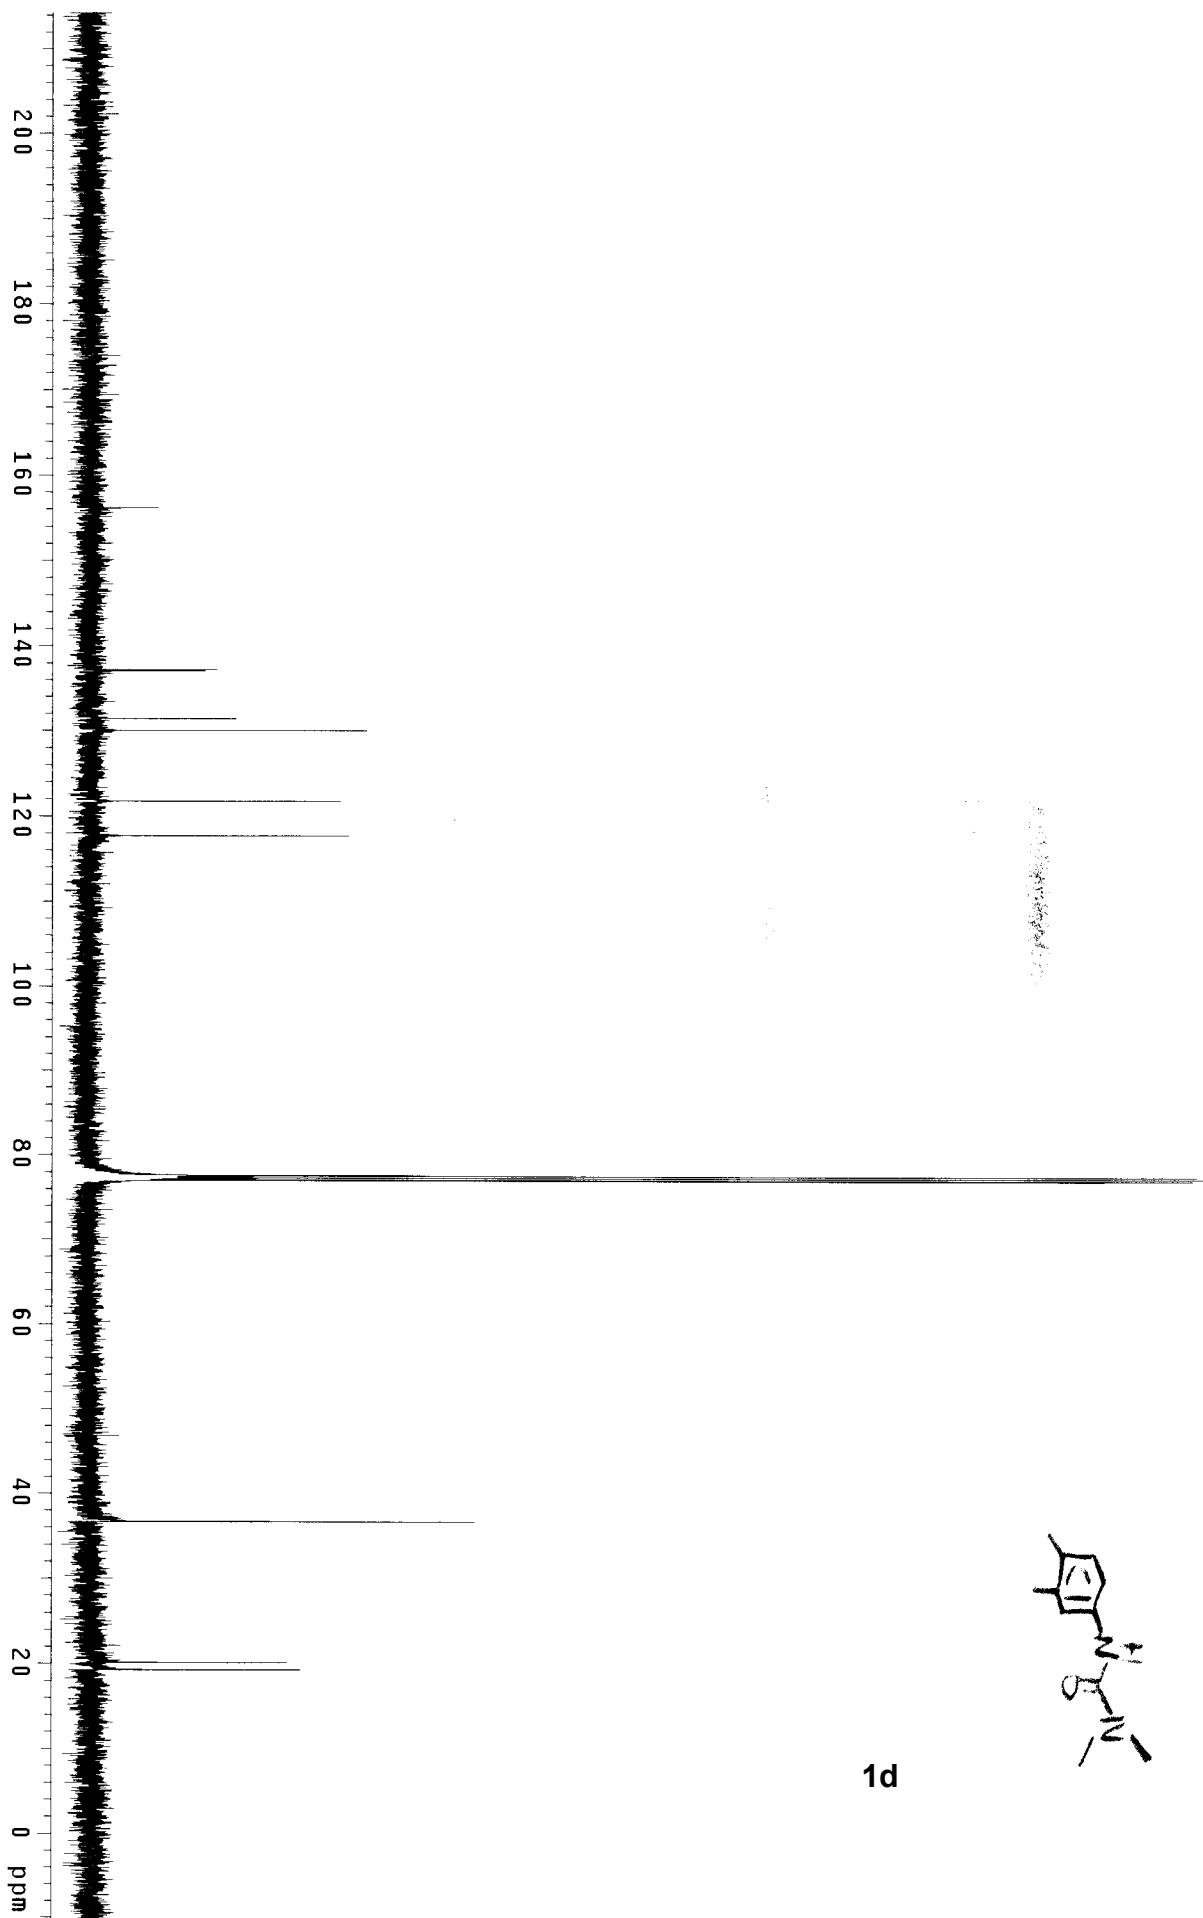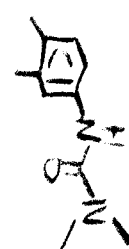

1d

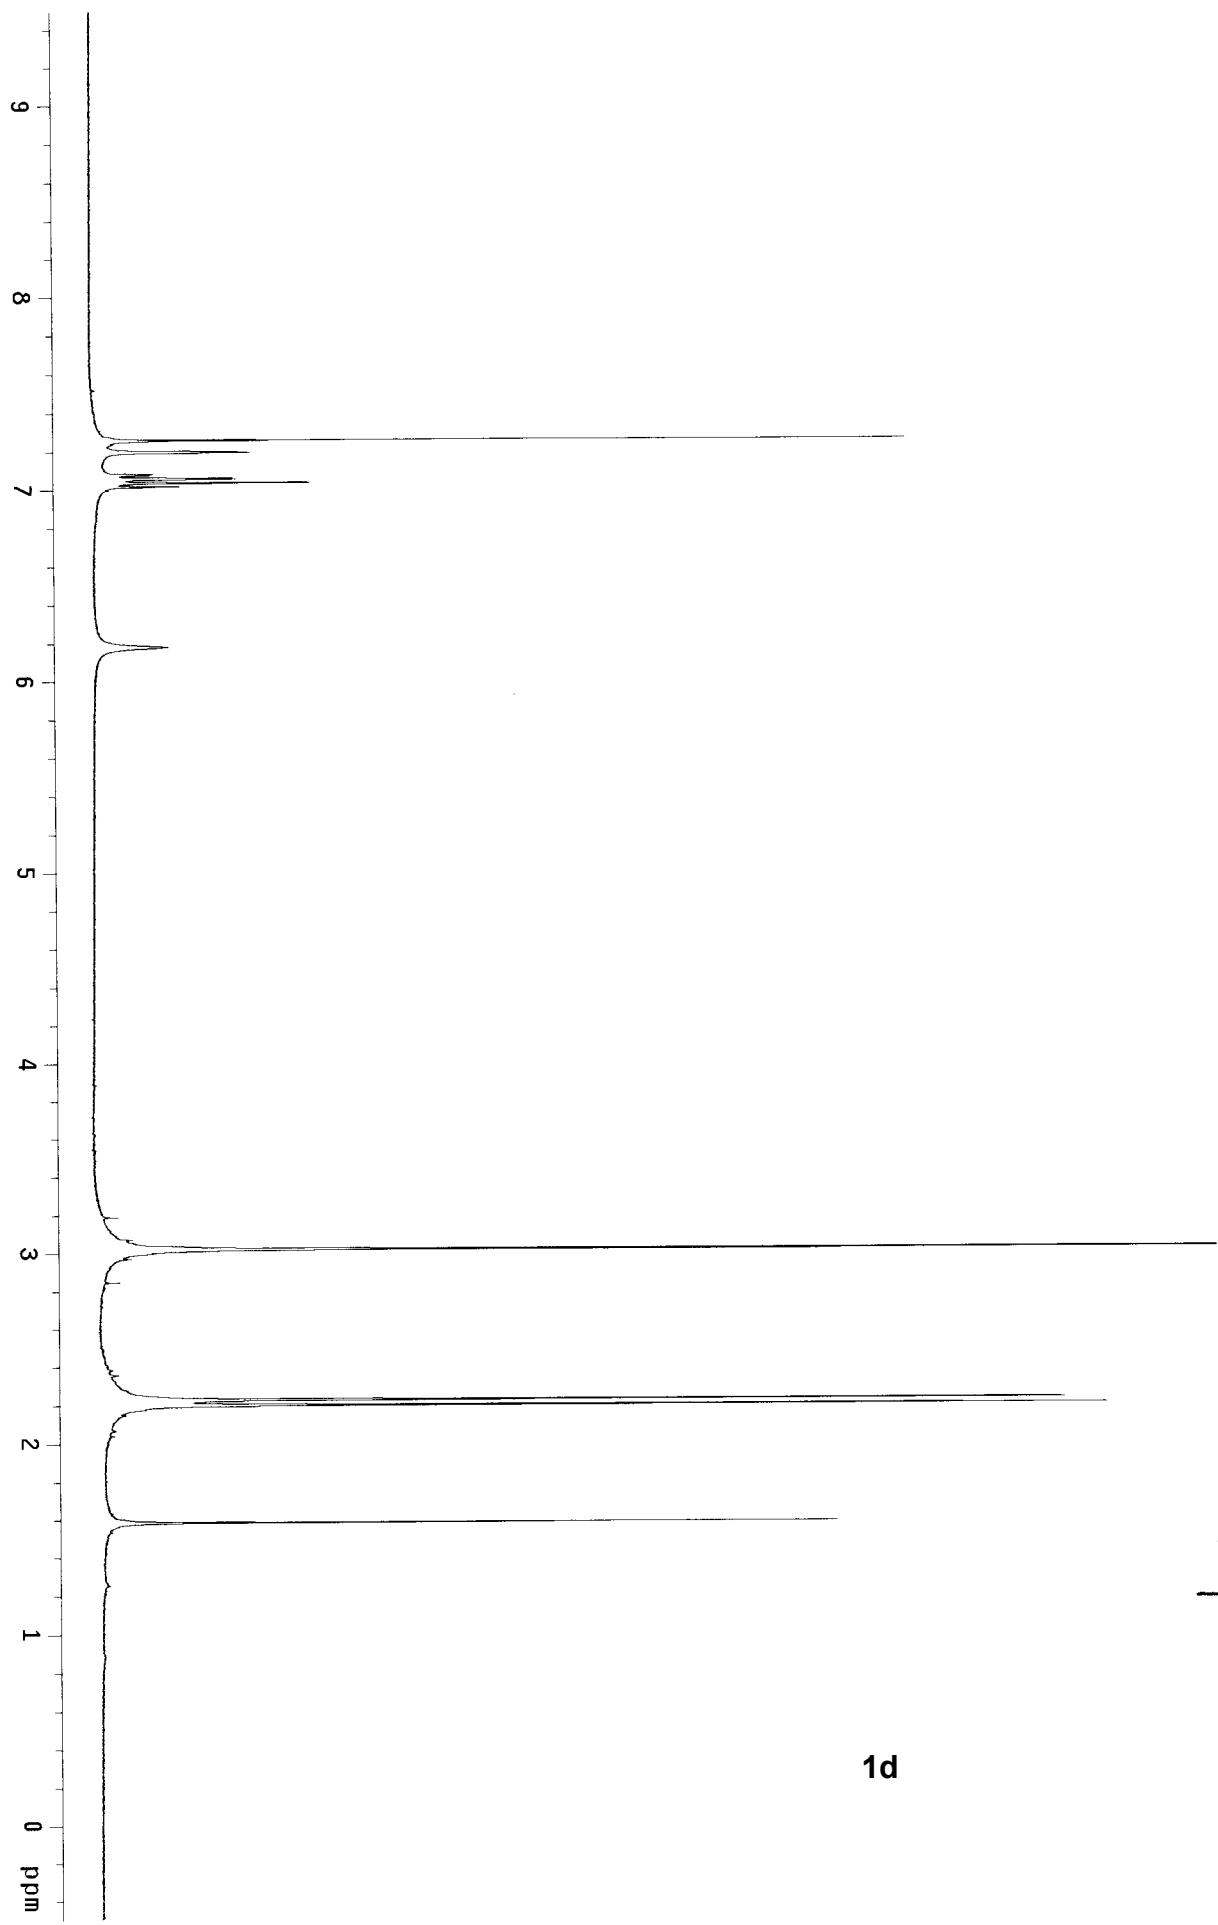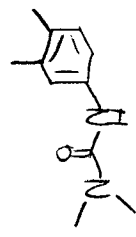

1d

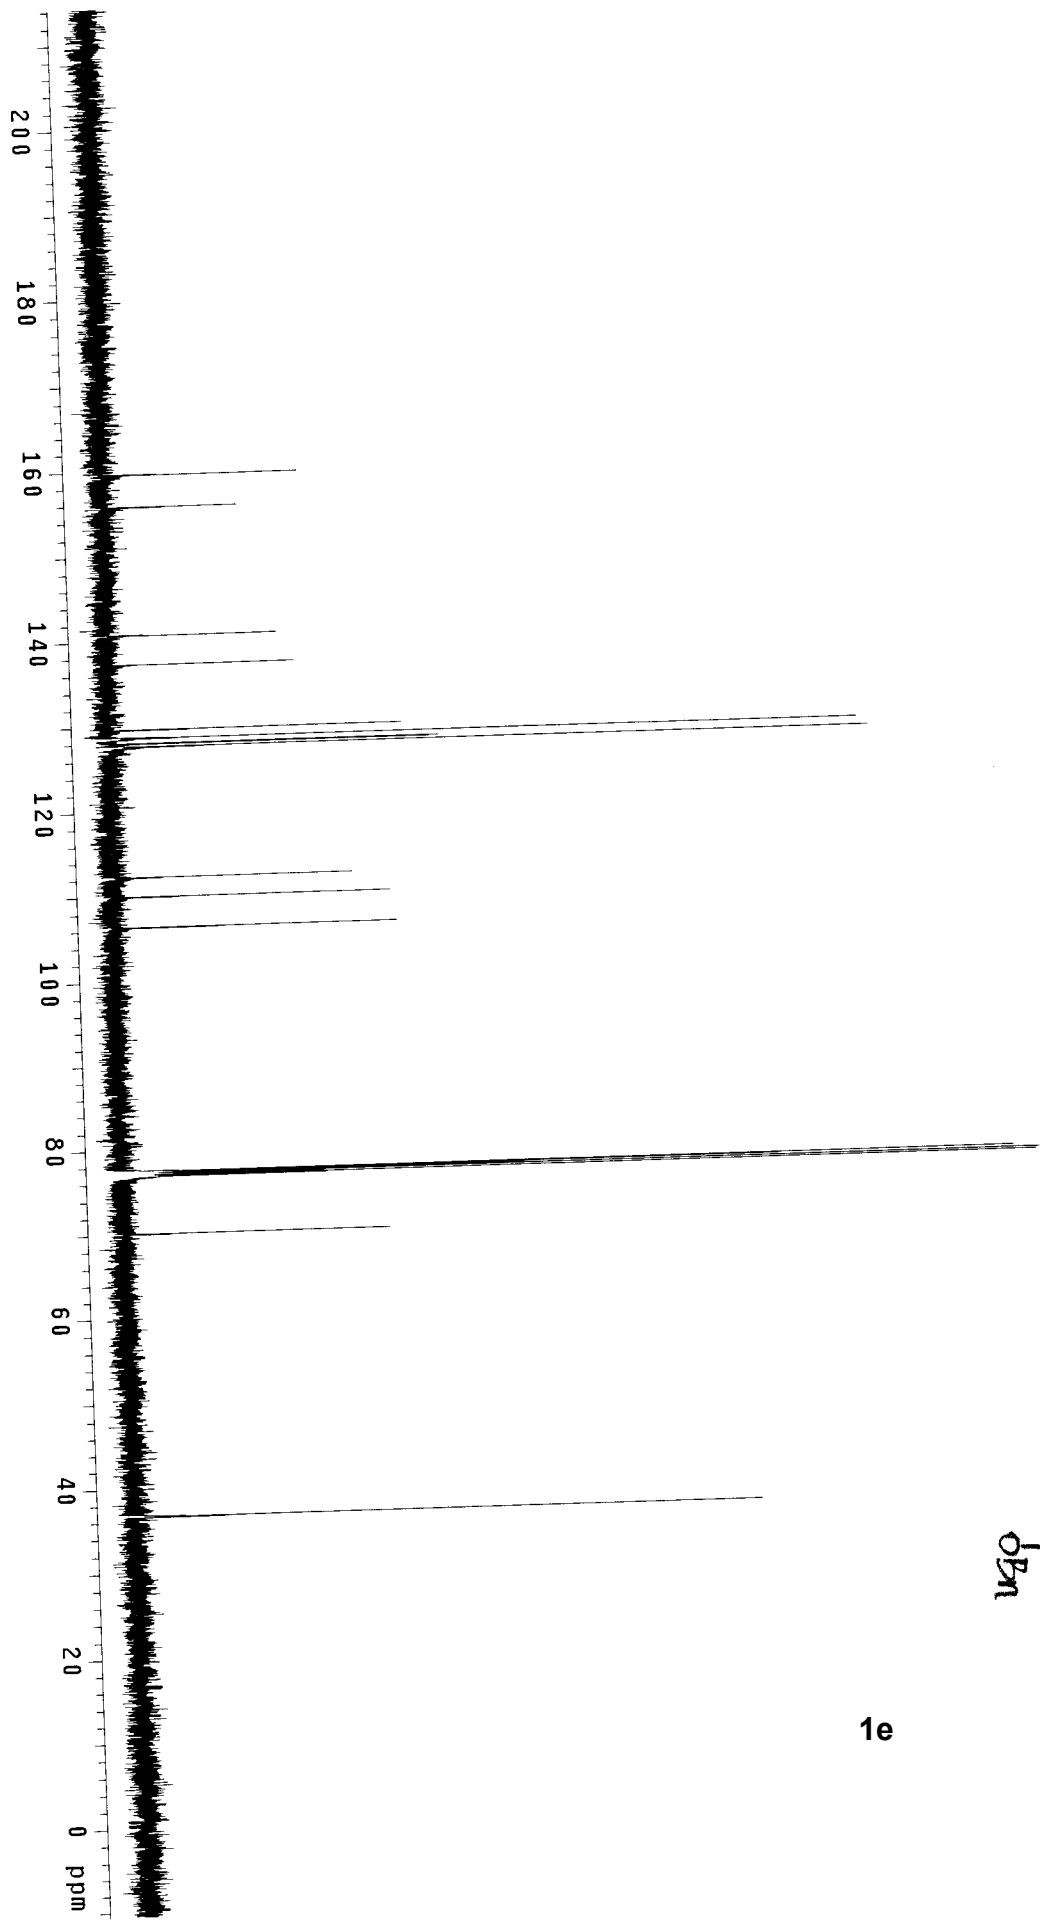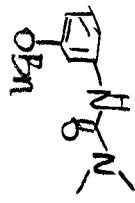

1e

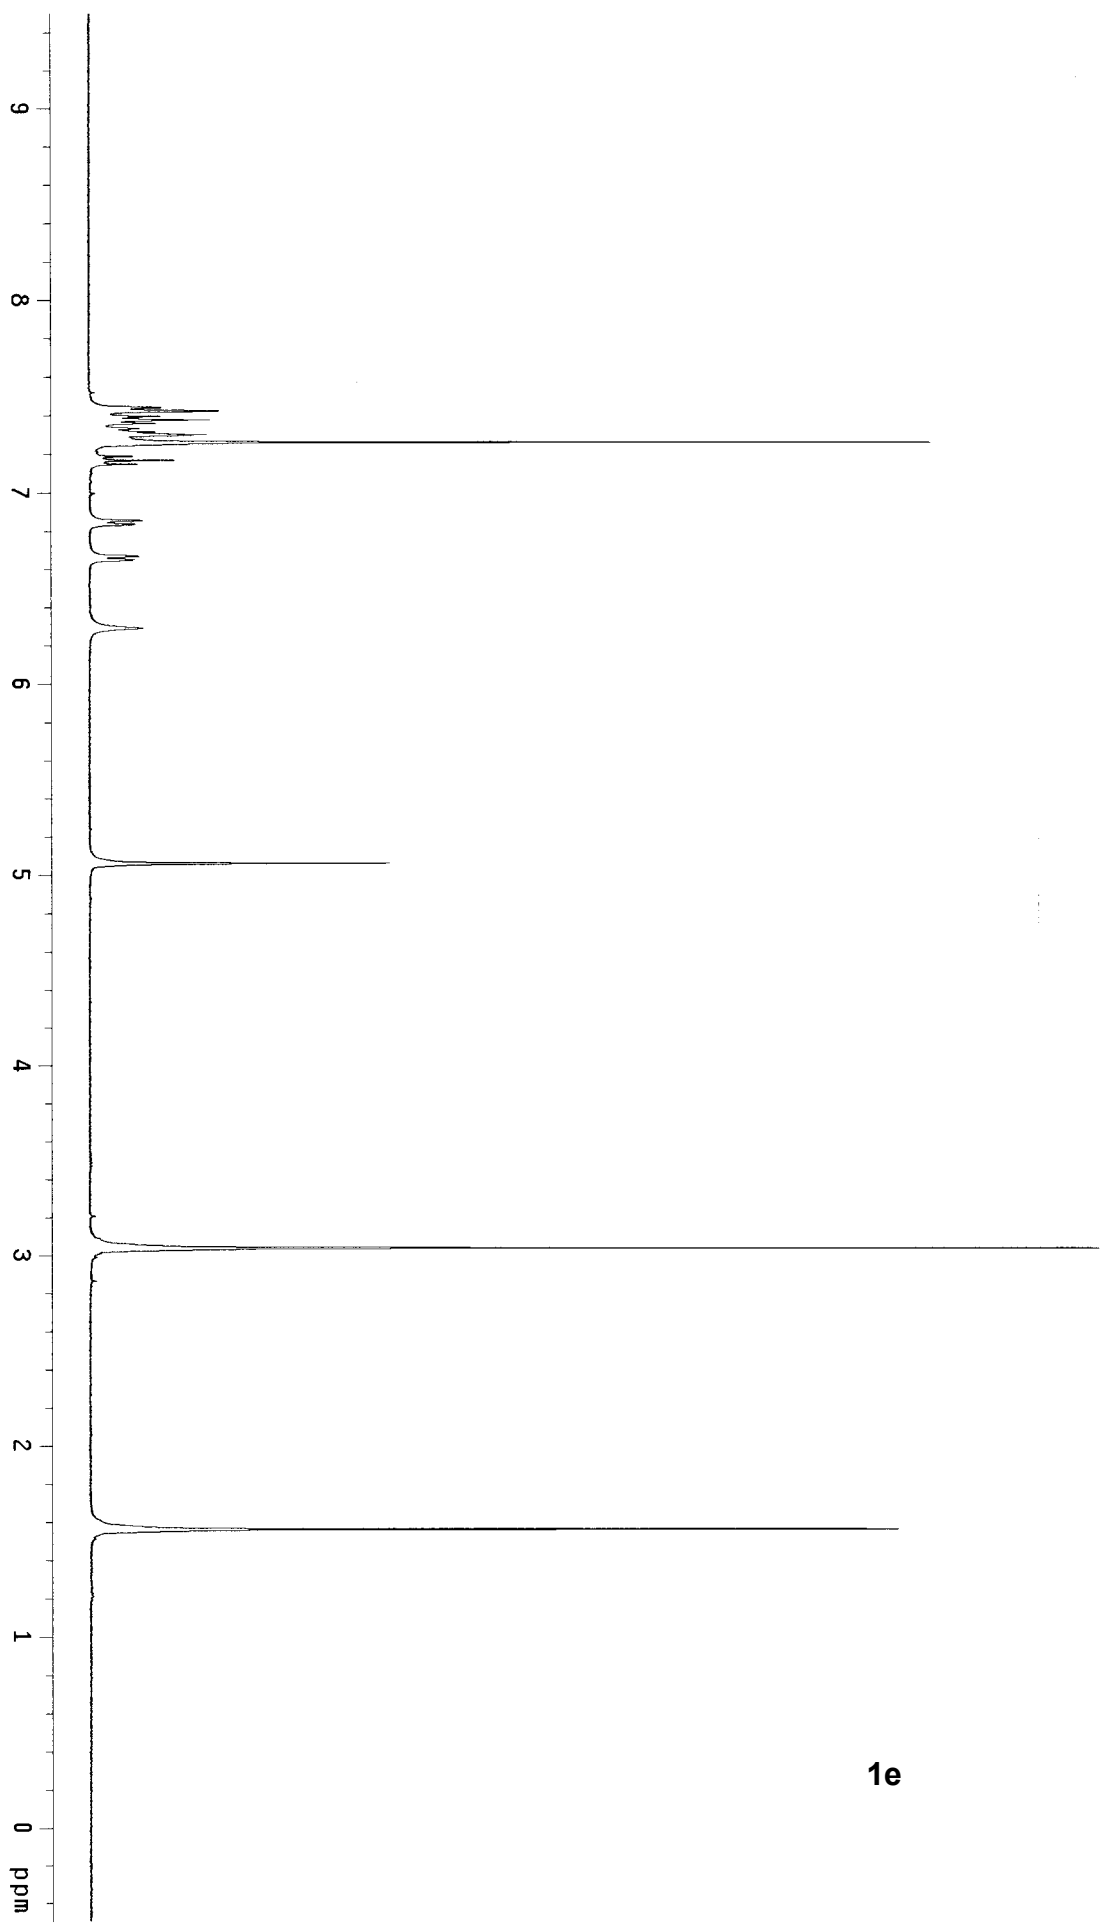

1e

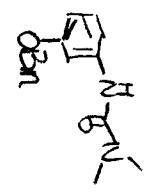

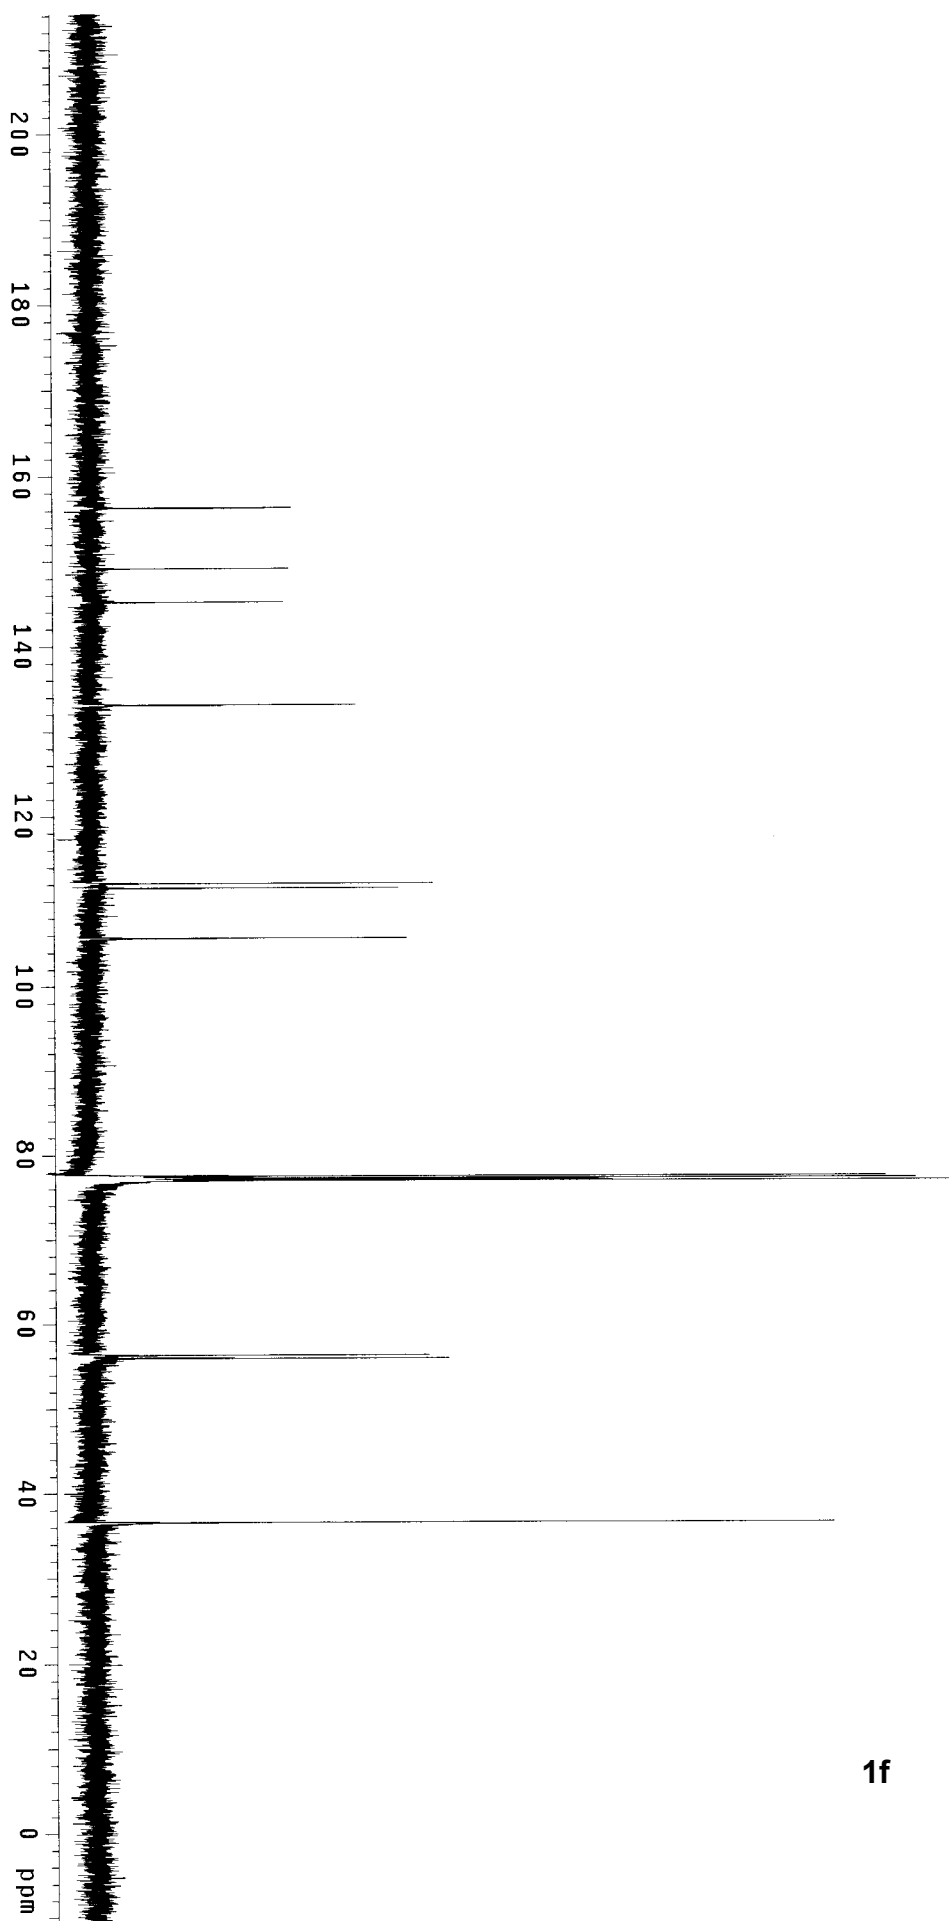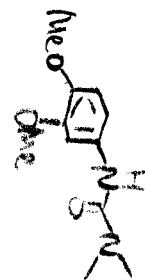

1f

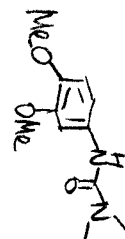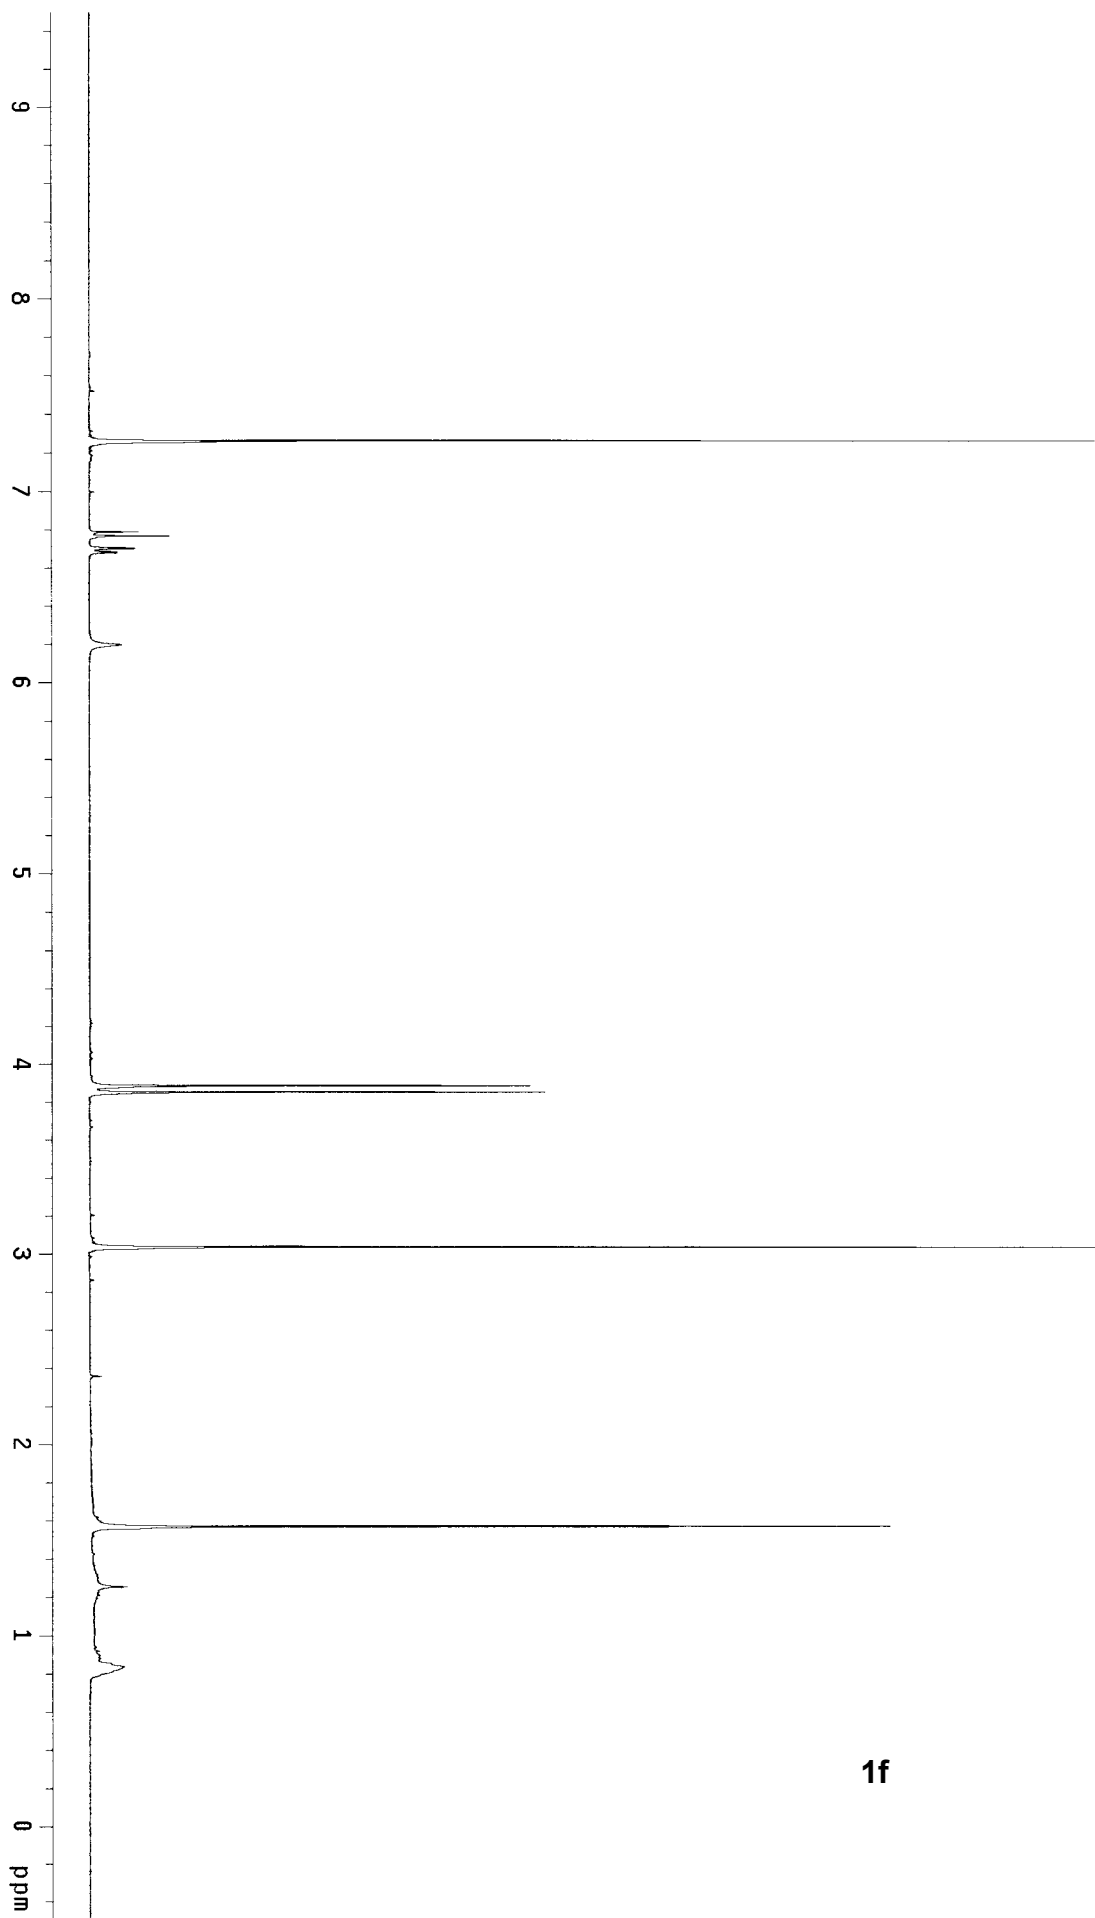

1f

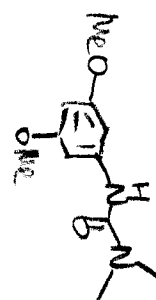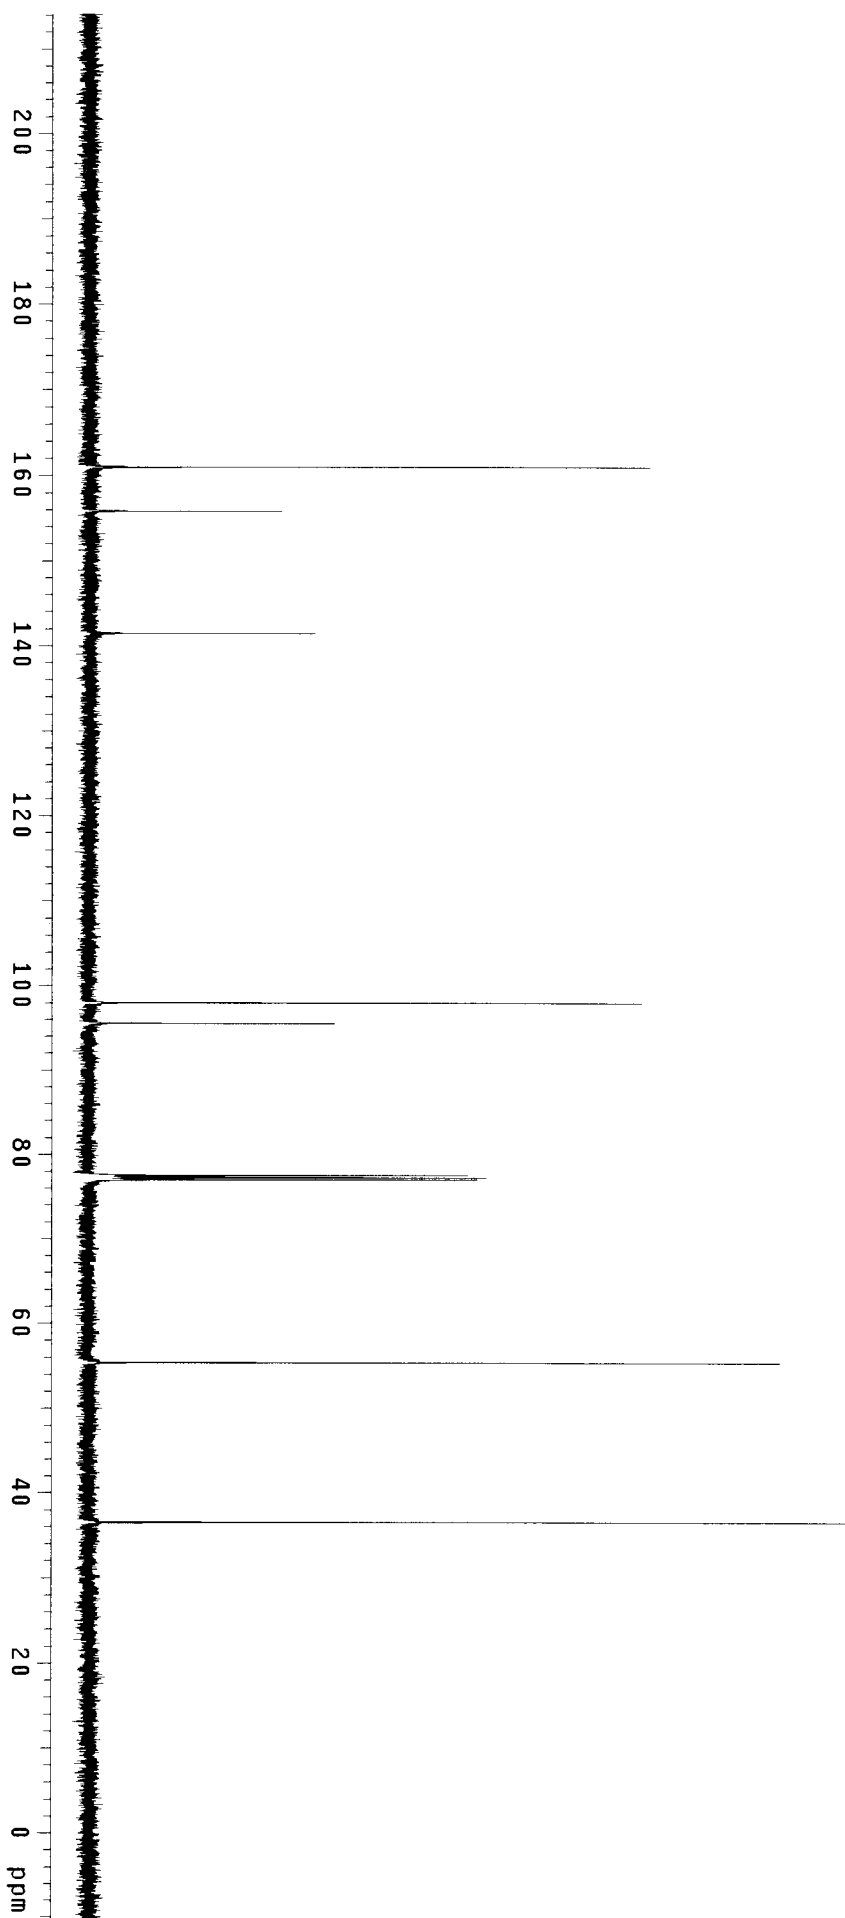

1g

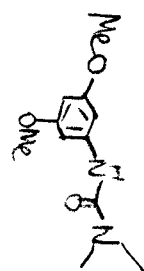

1g

9  
8  
7  
6  
5  
4  
3  
2  
1  
0 ppm

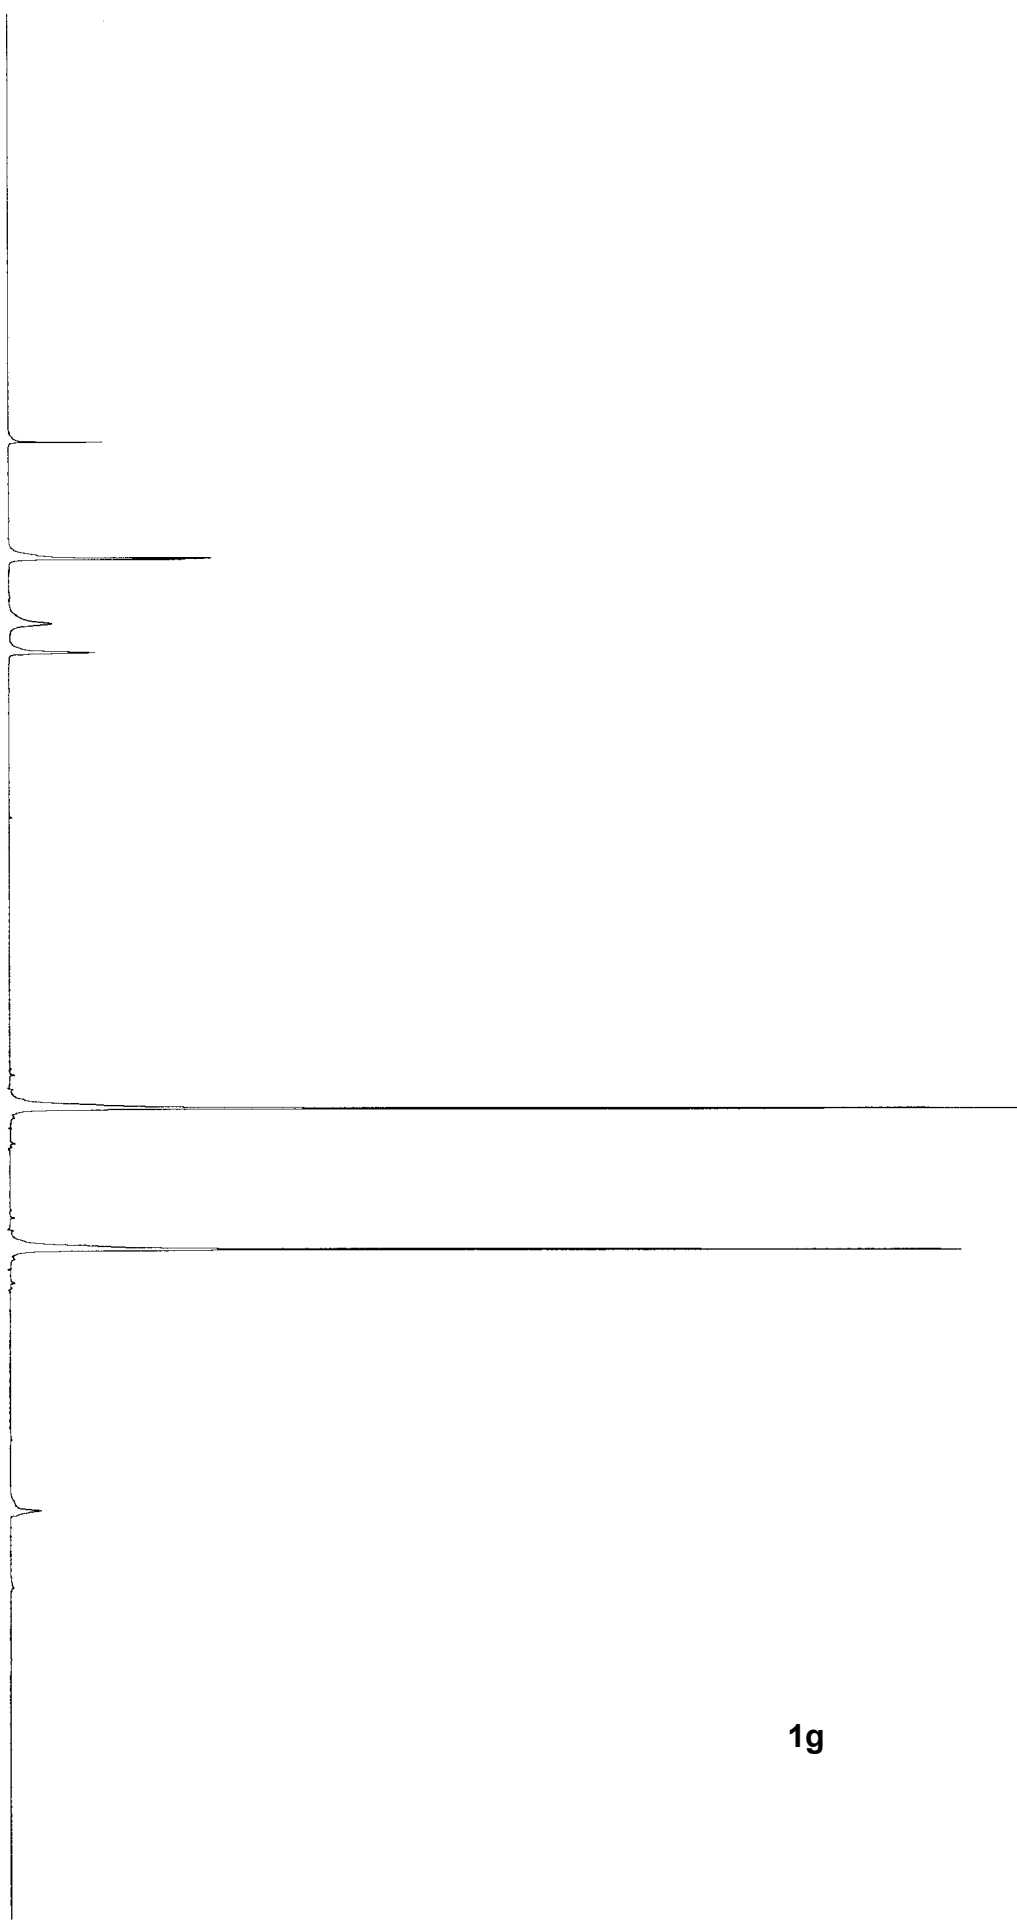



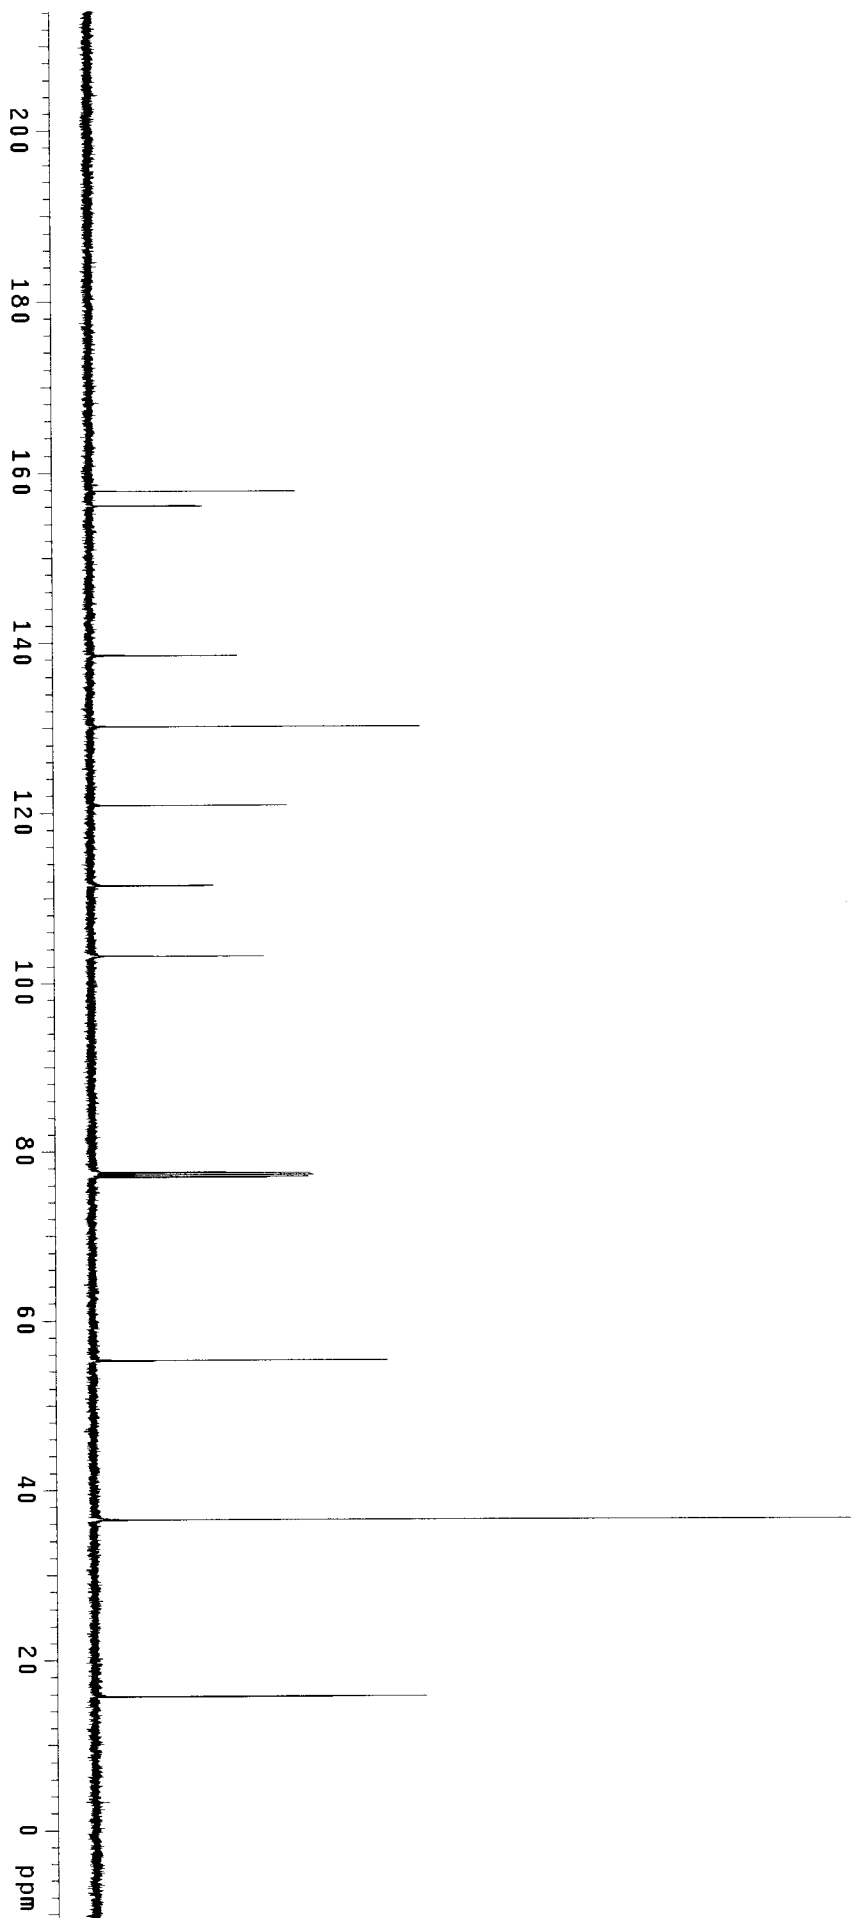

1h

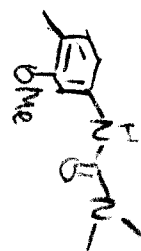

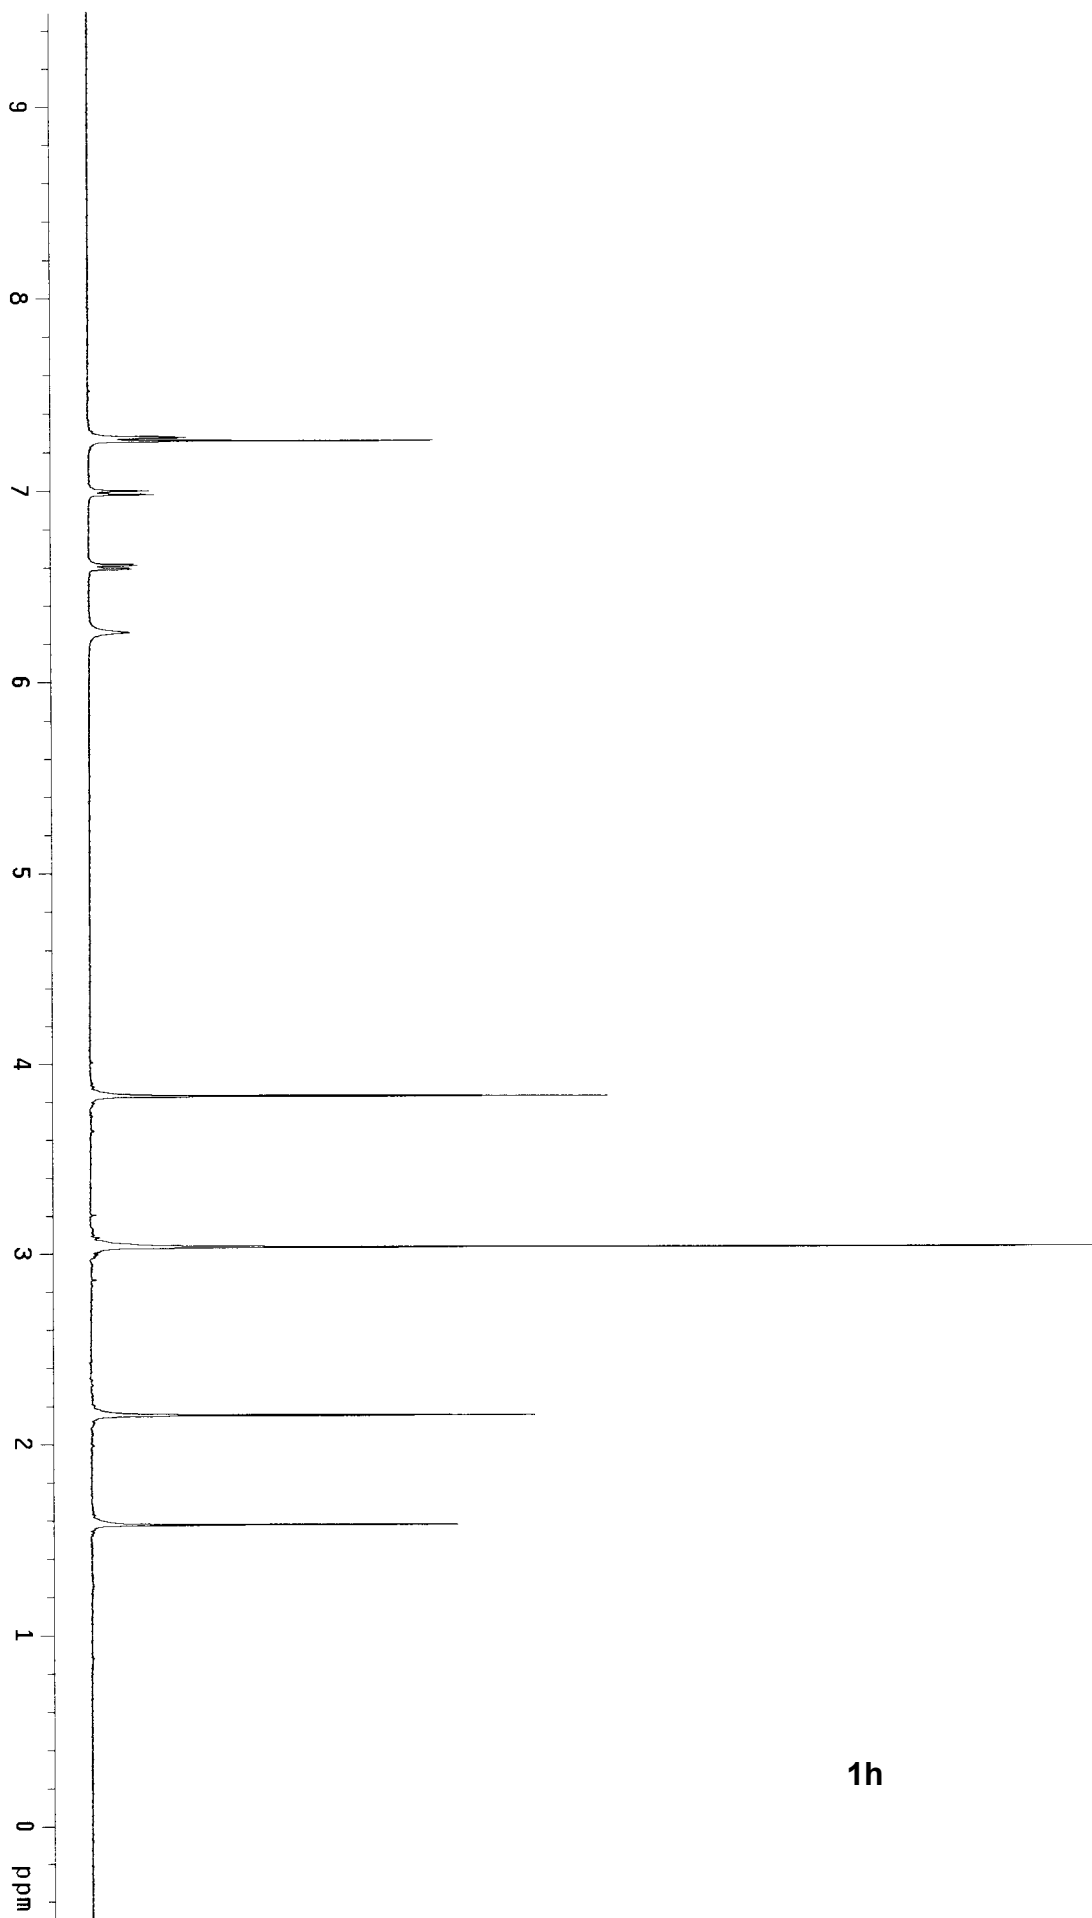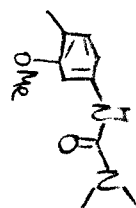

1h

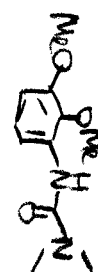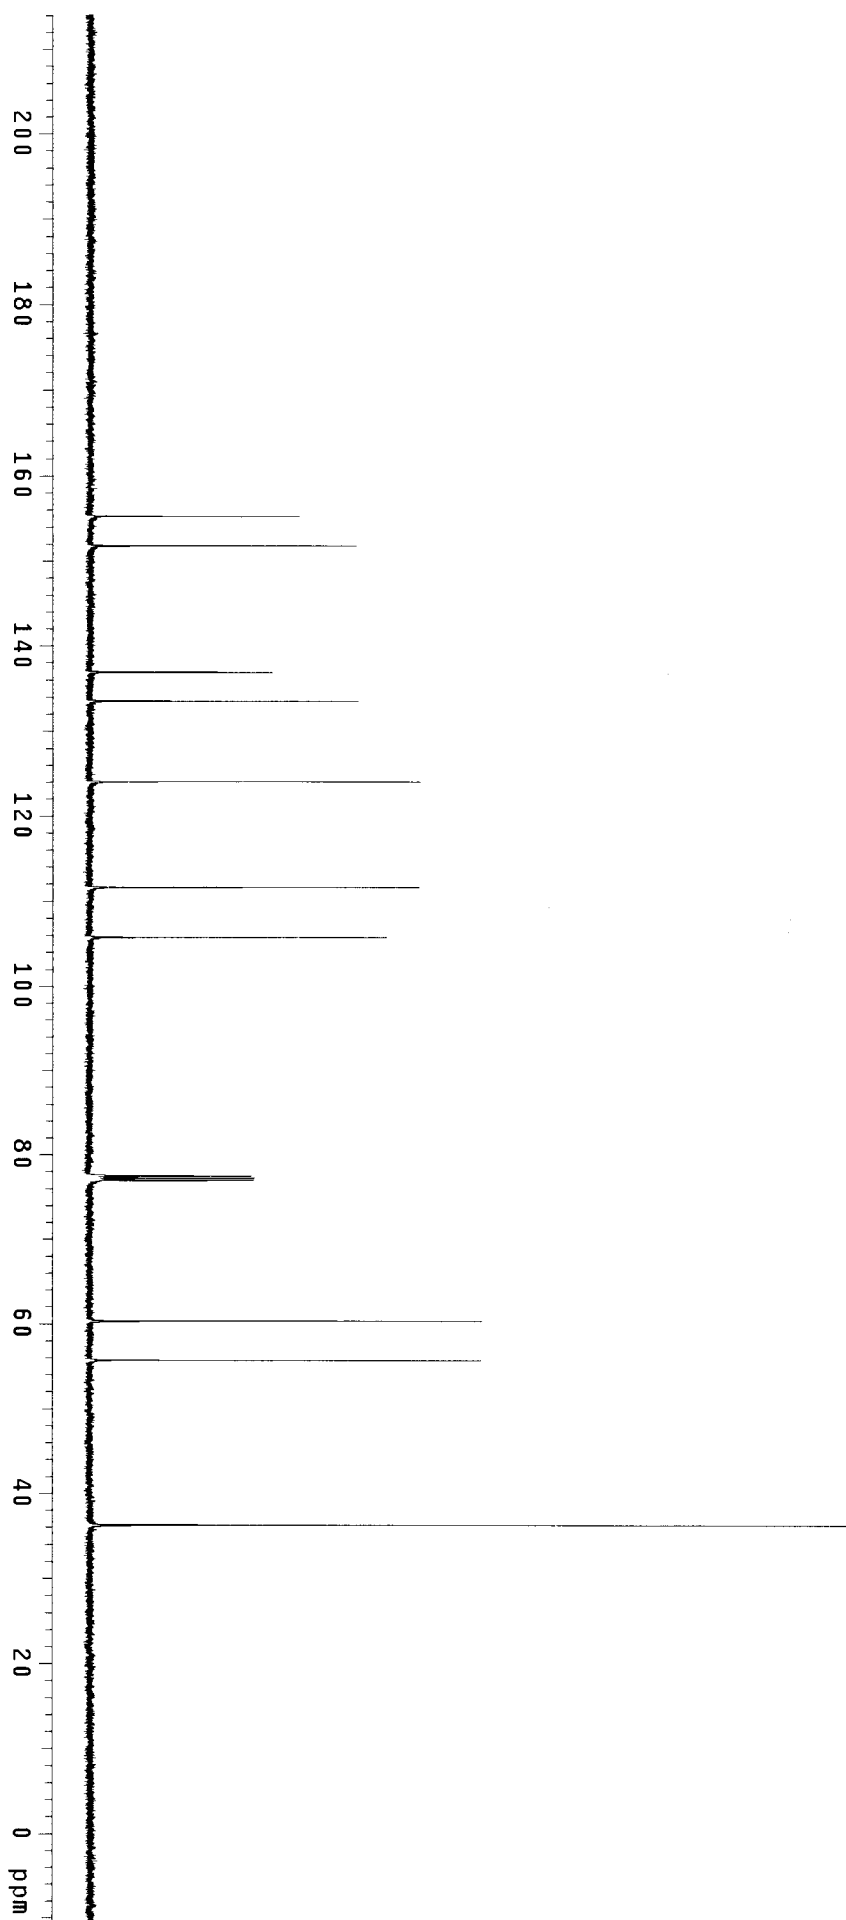

1i

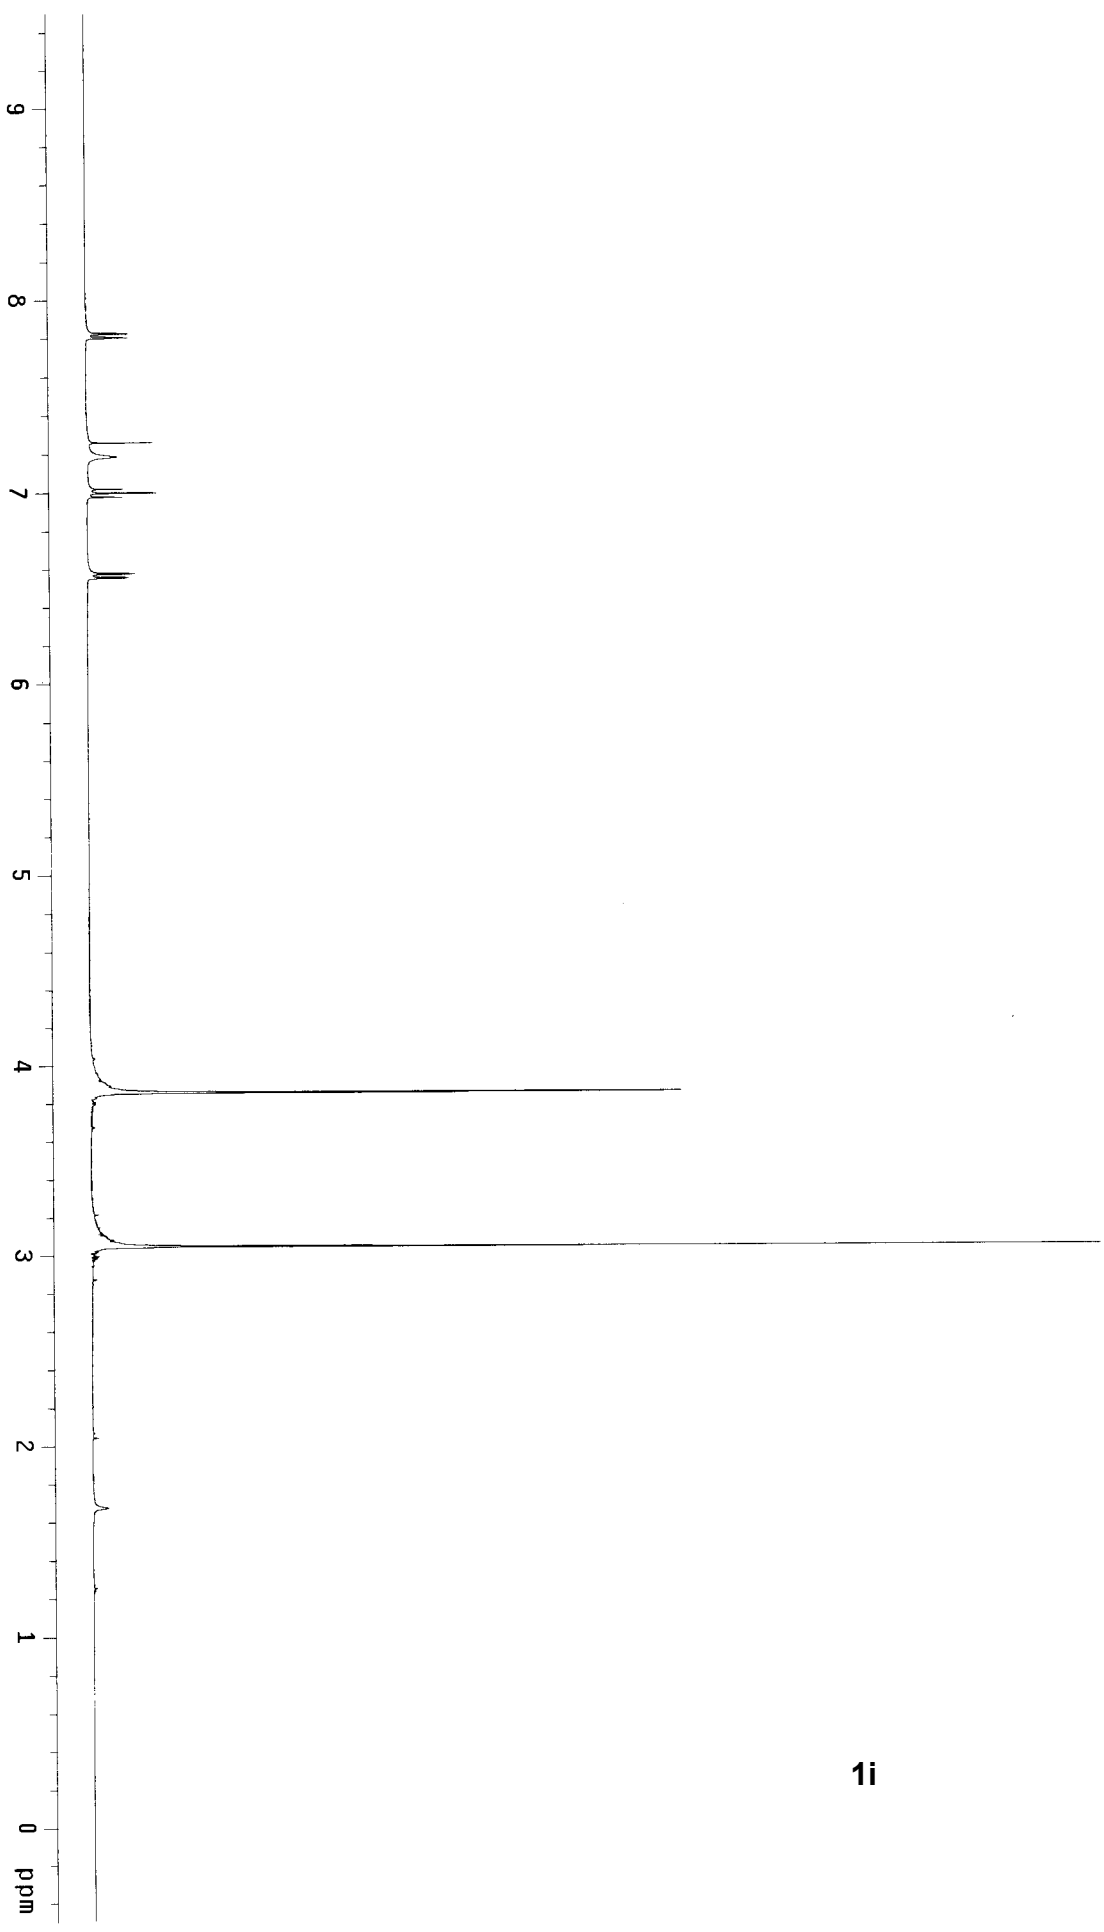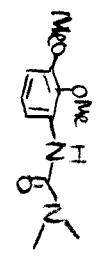

1i

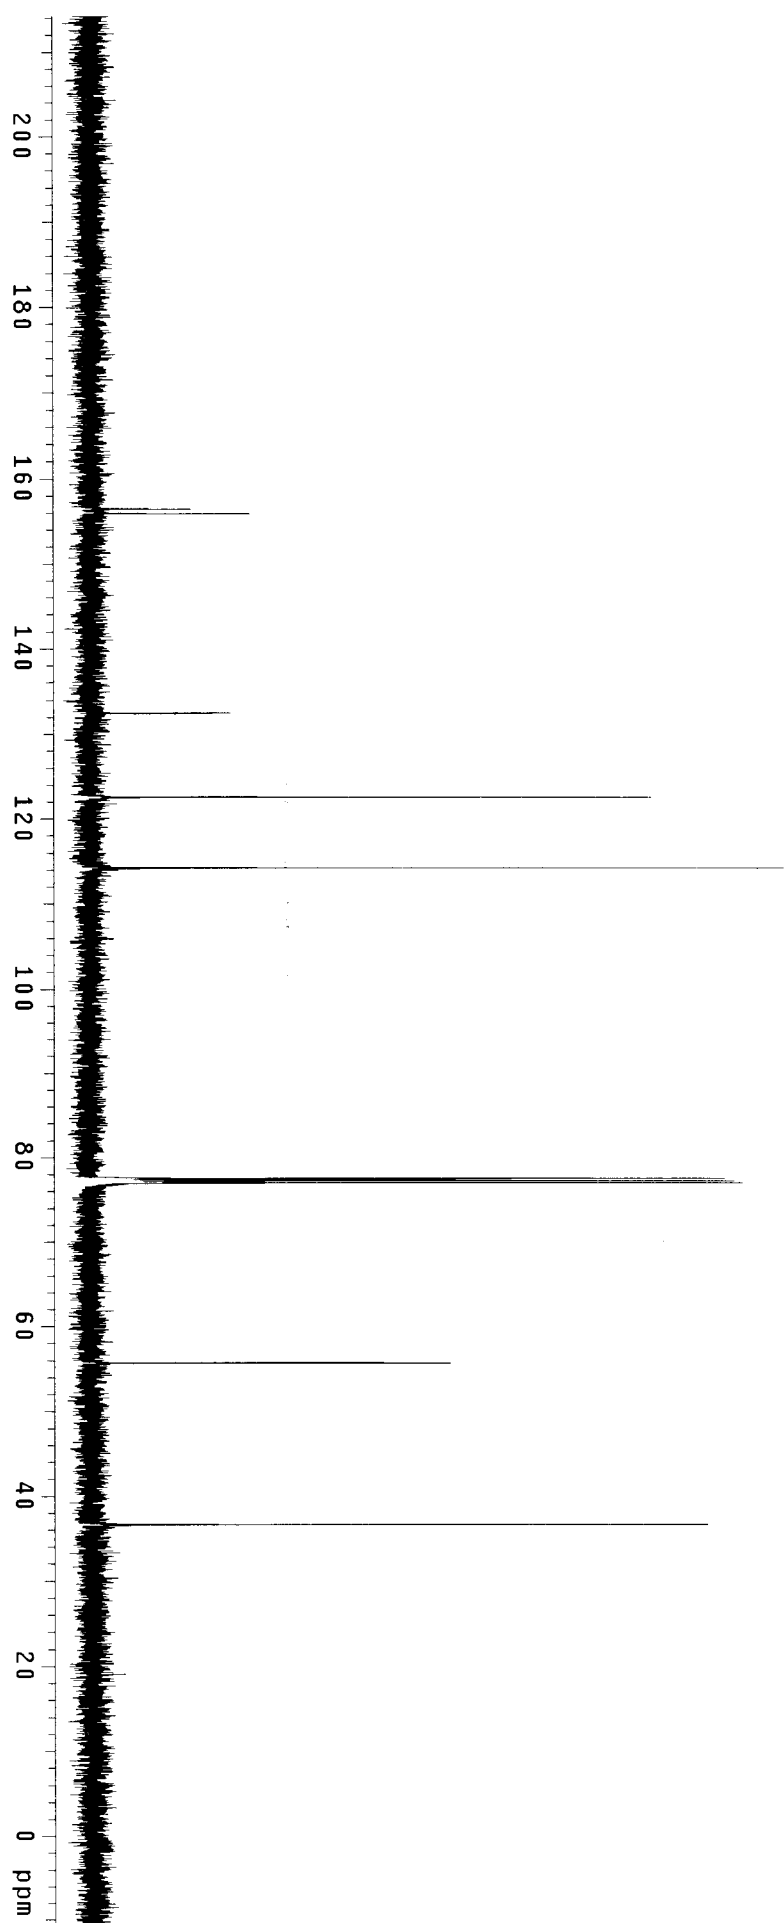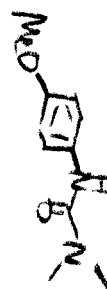

1j

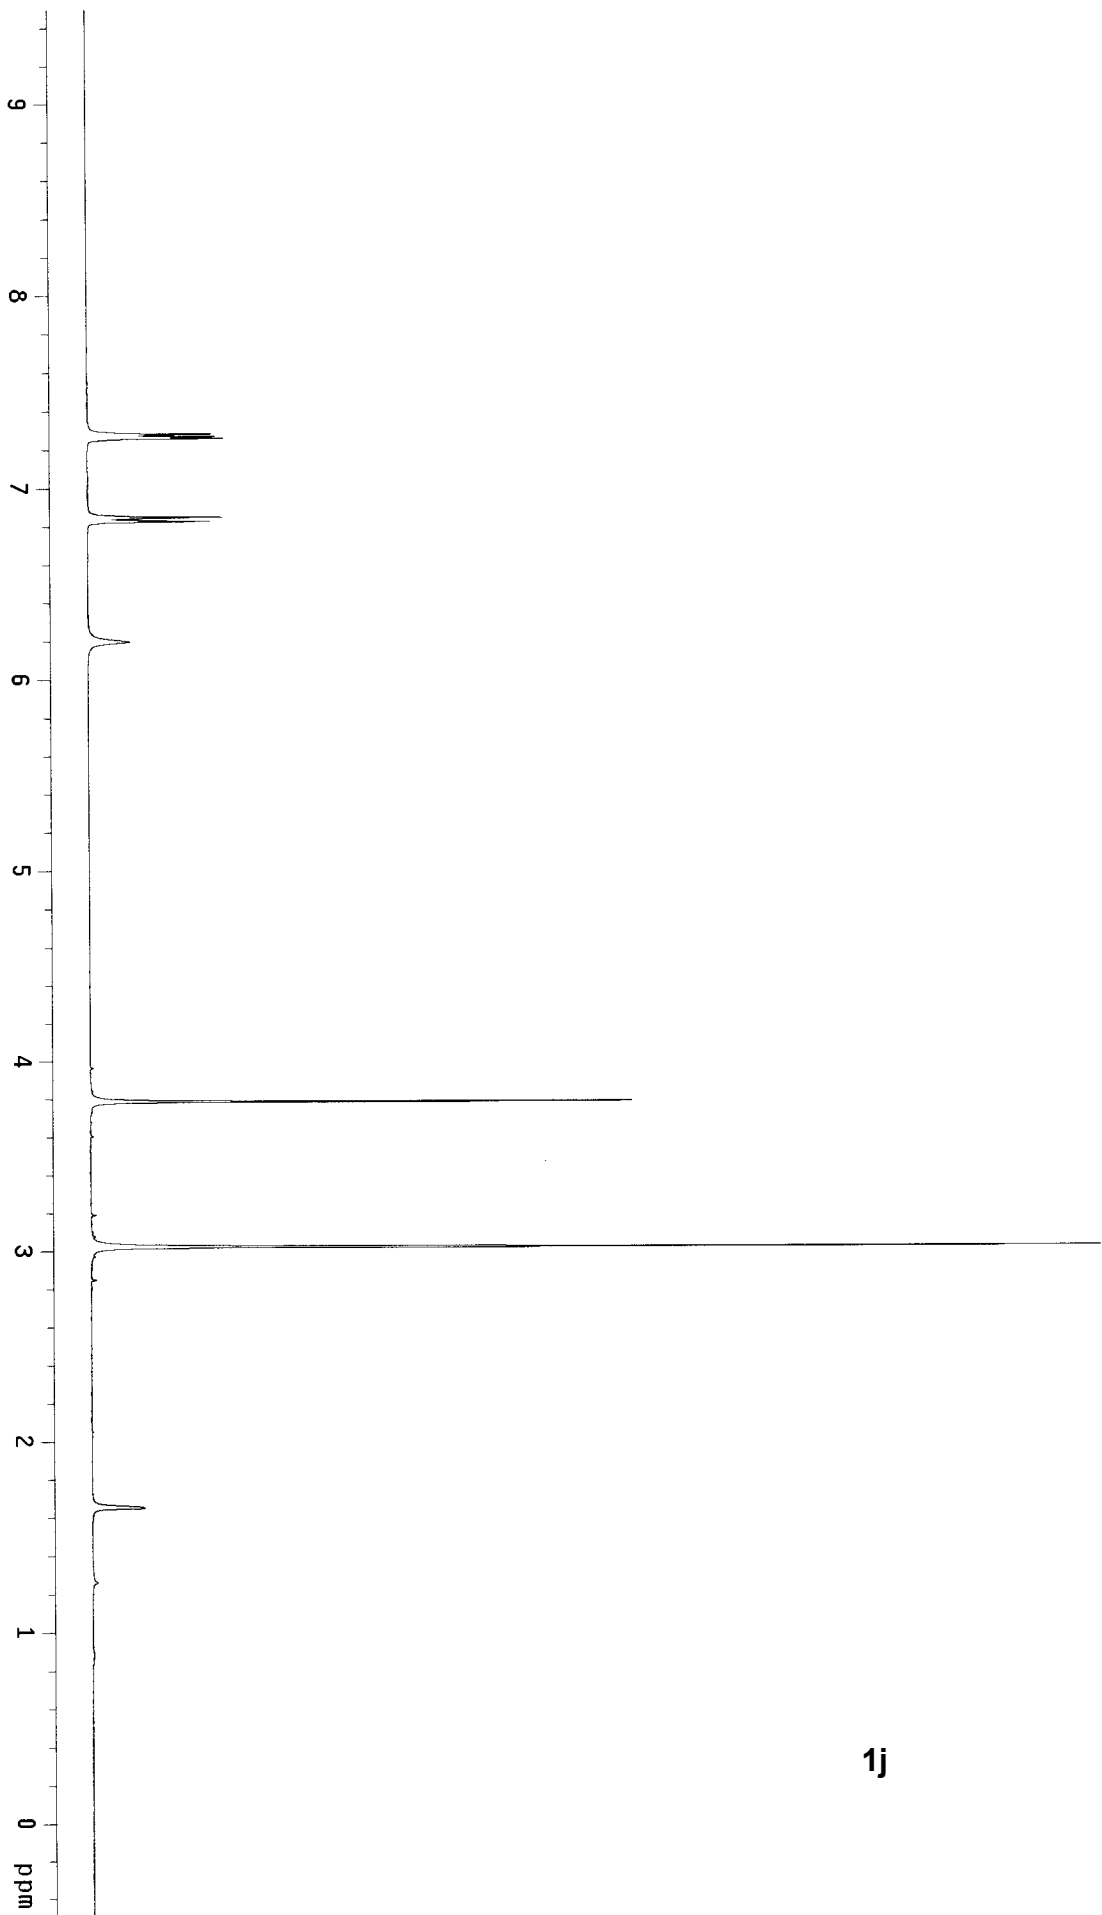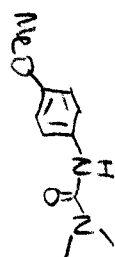

1j

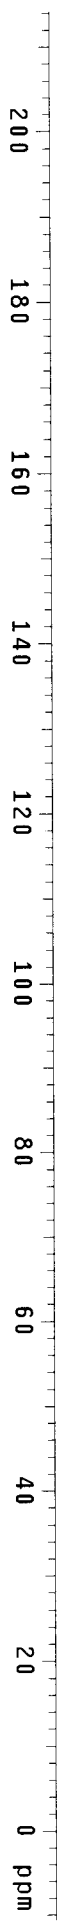

1k

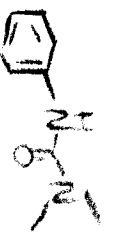

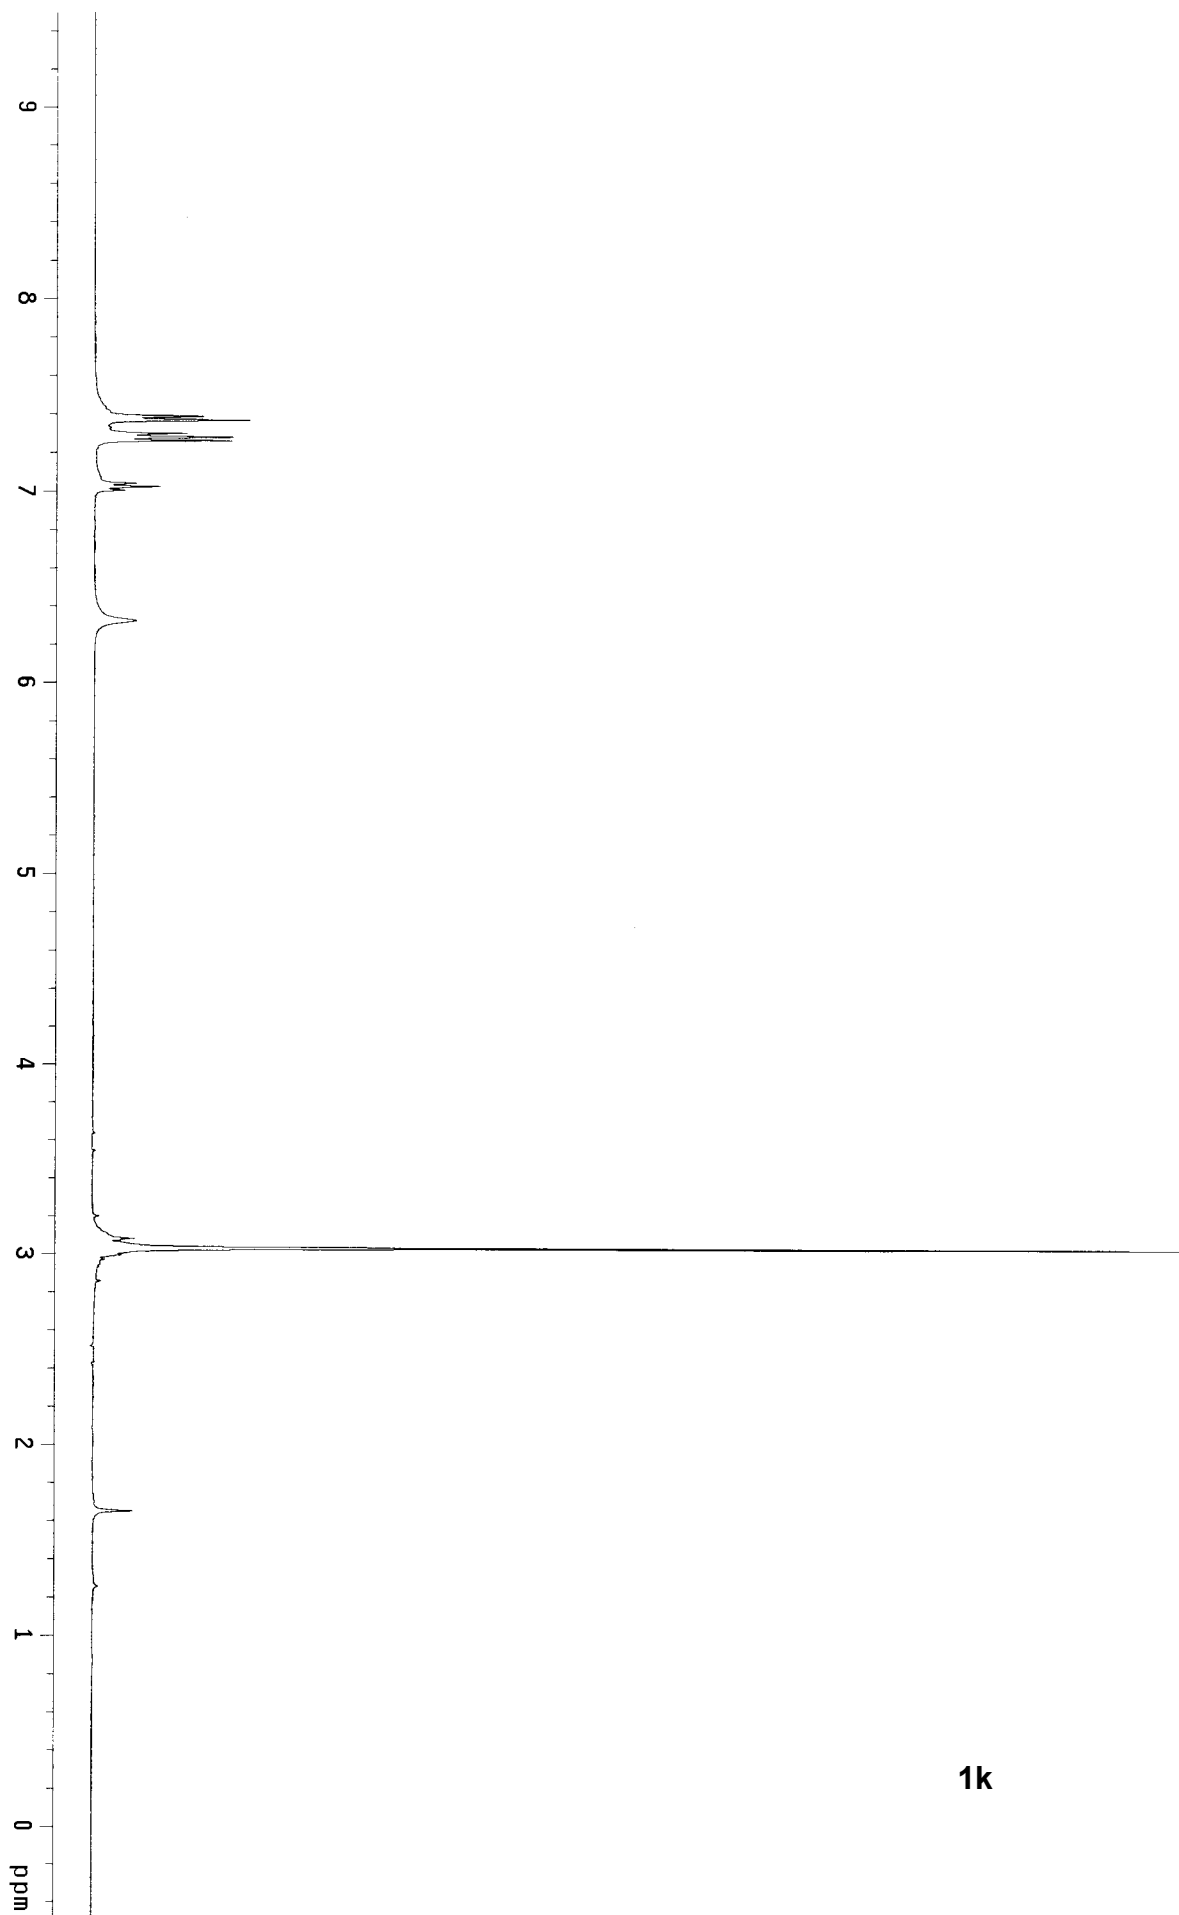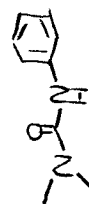

1k



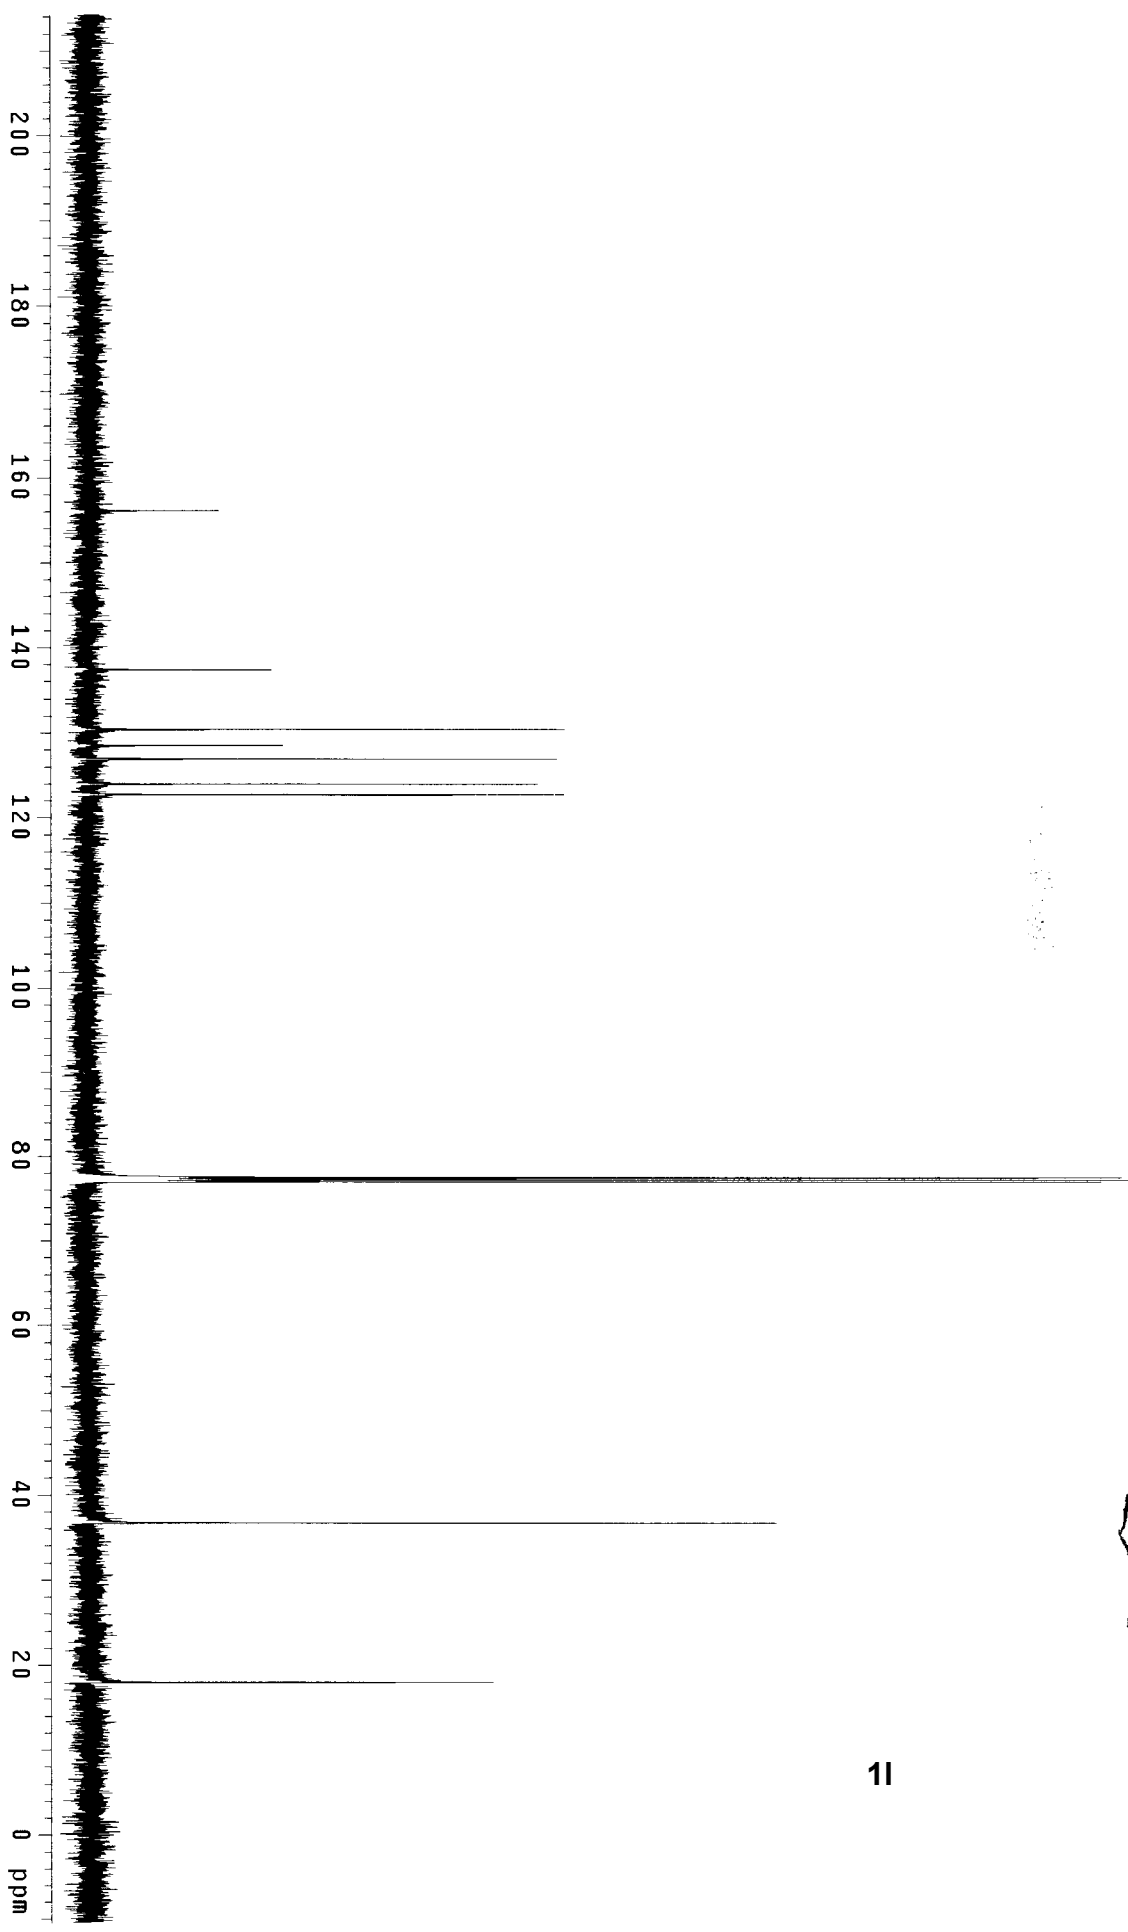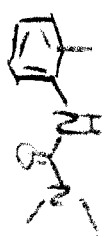

11

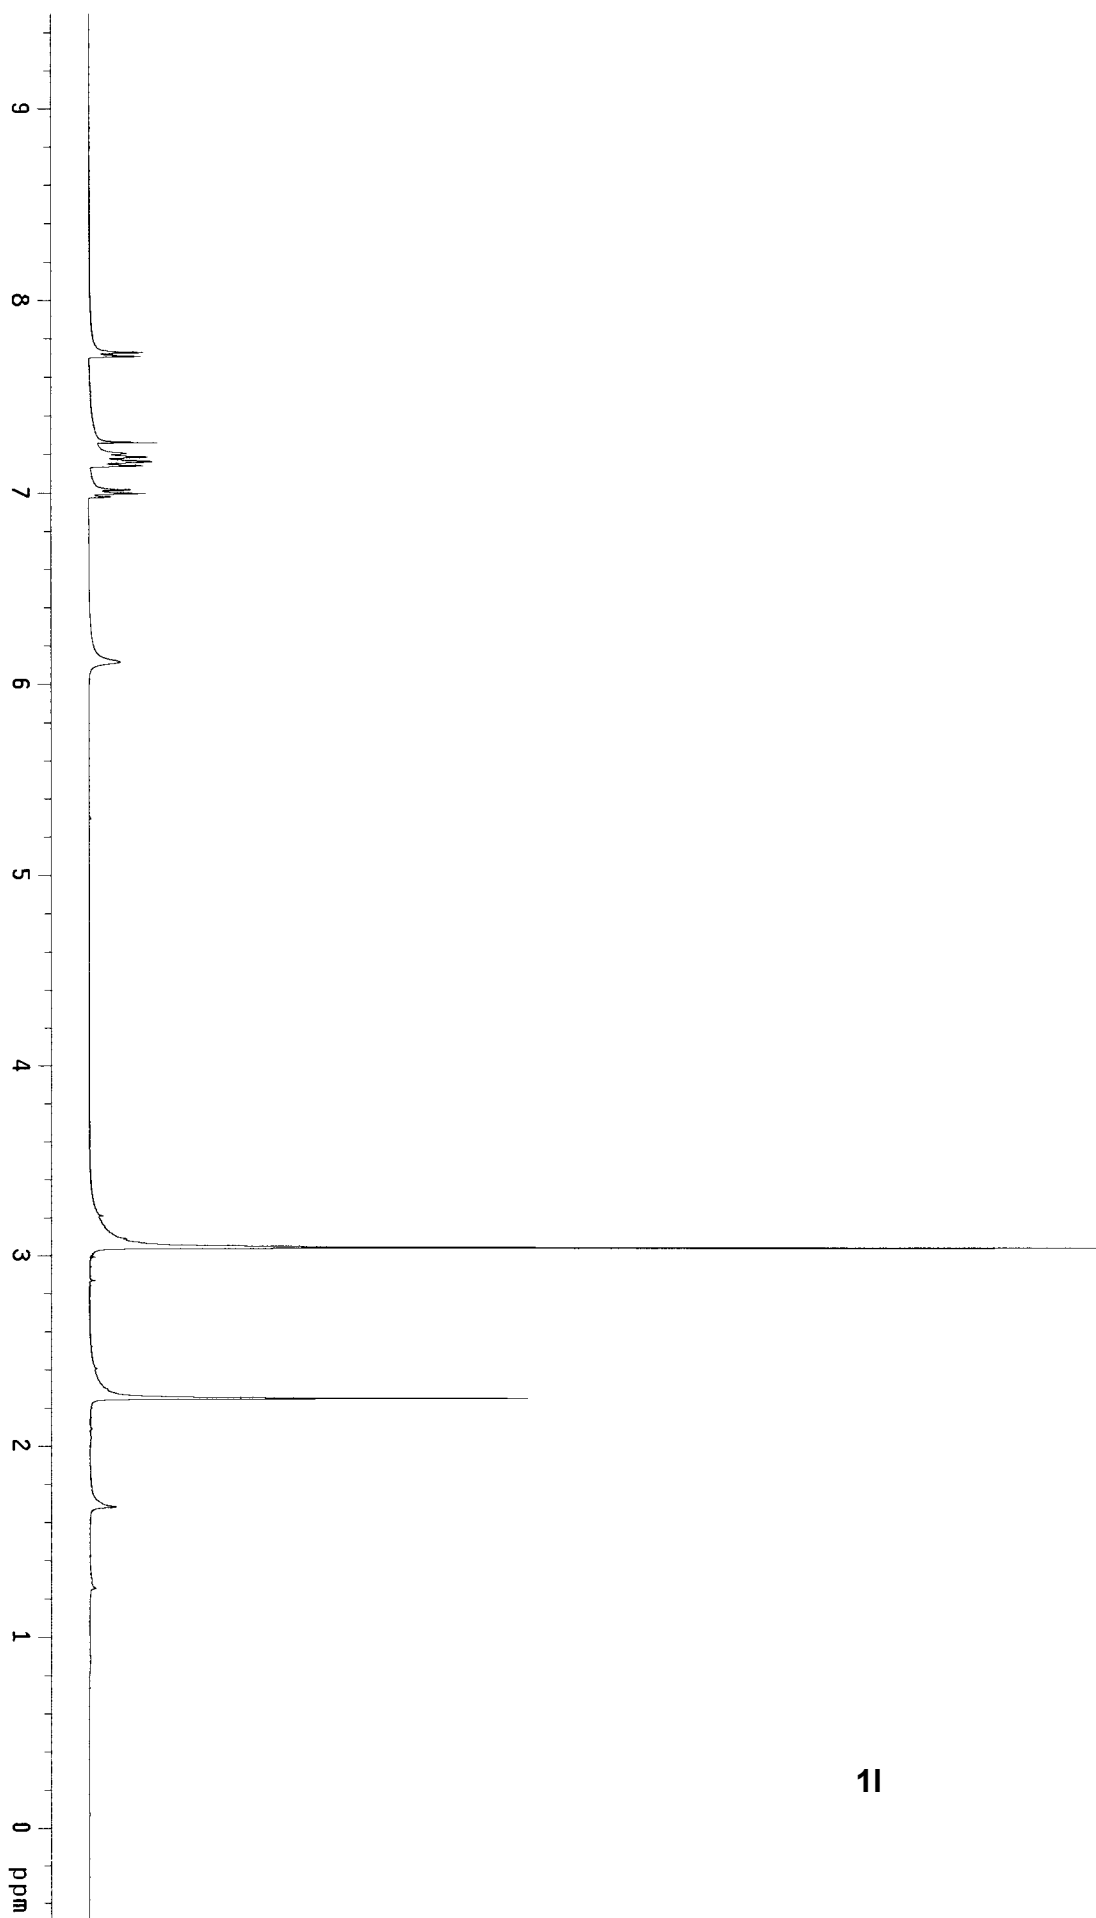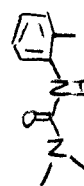

11

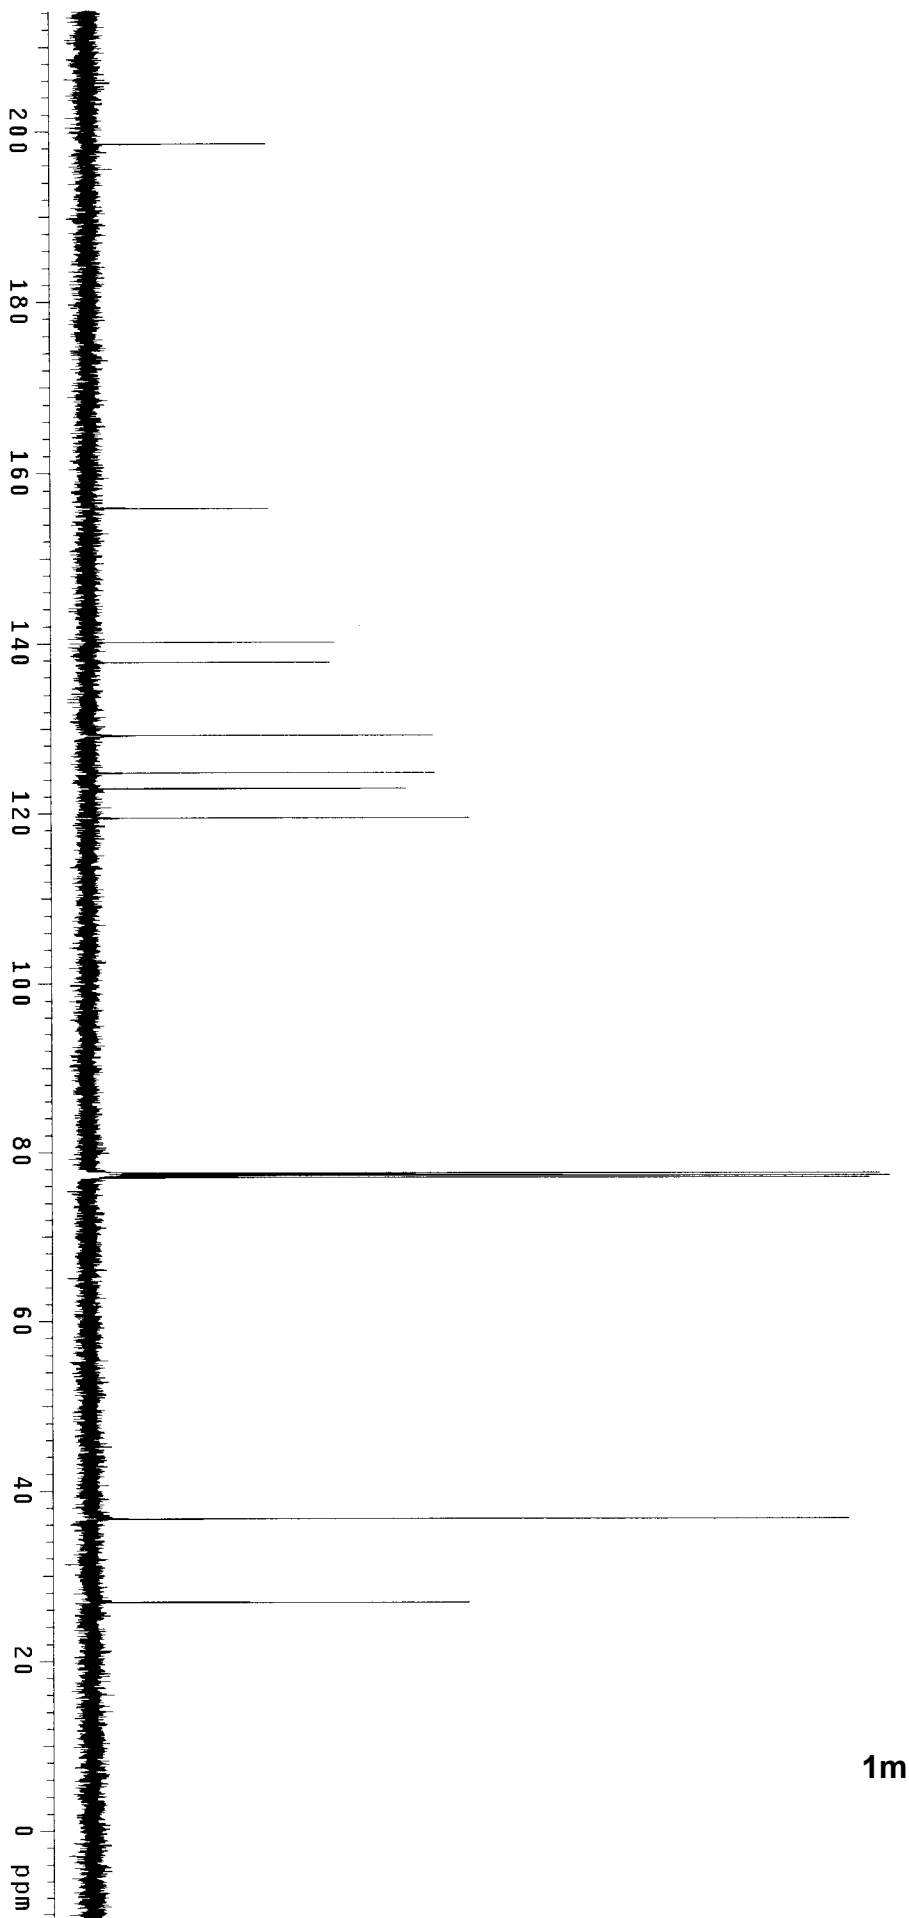

1m

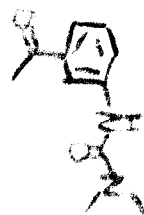

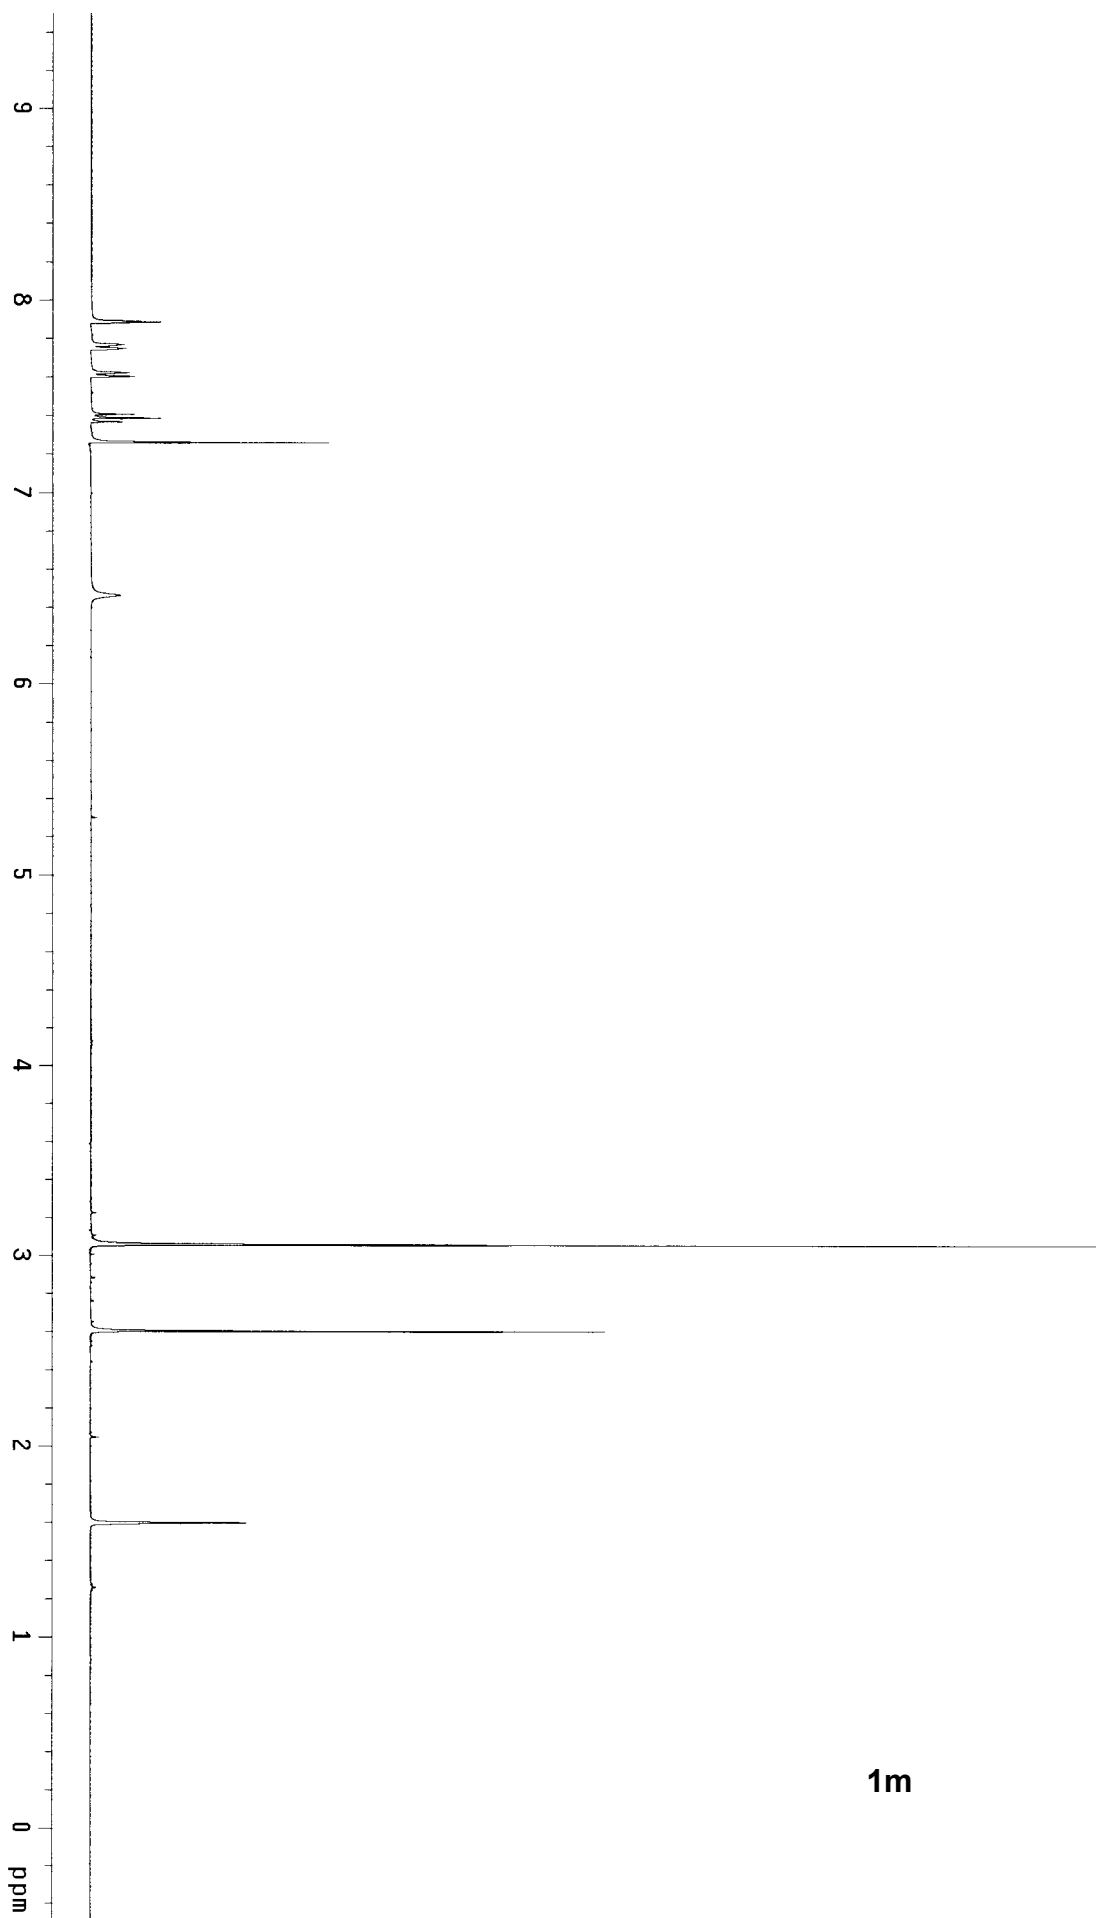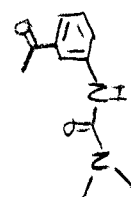

1m

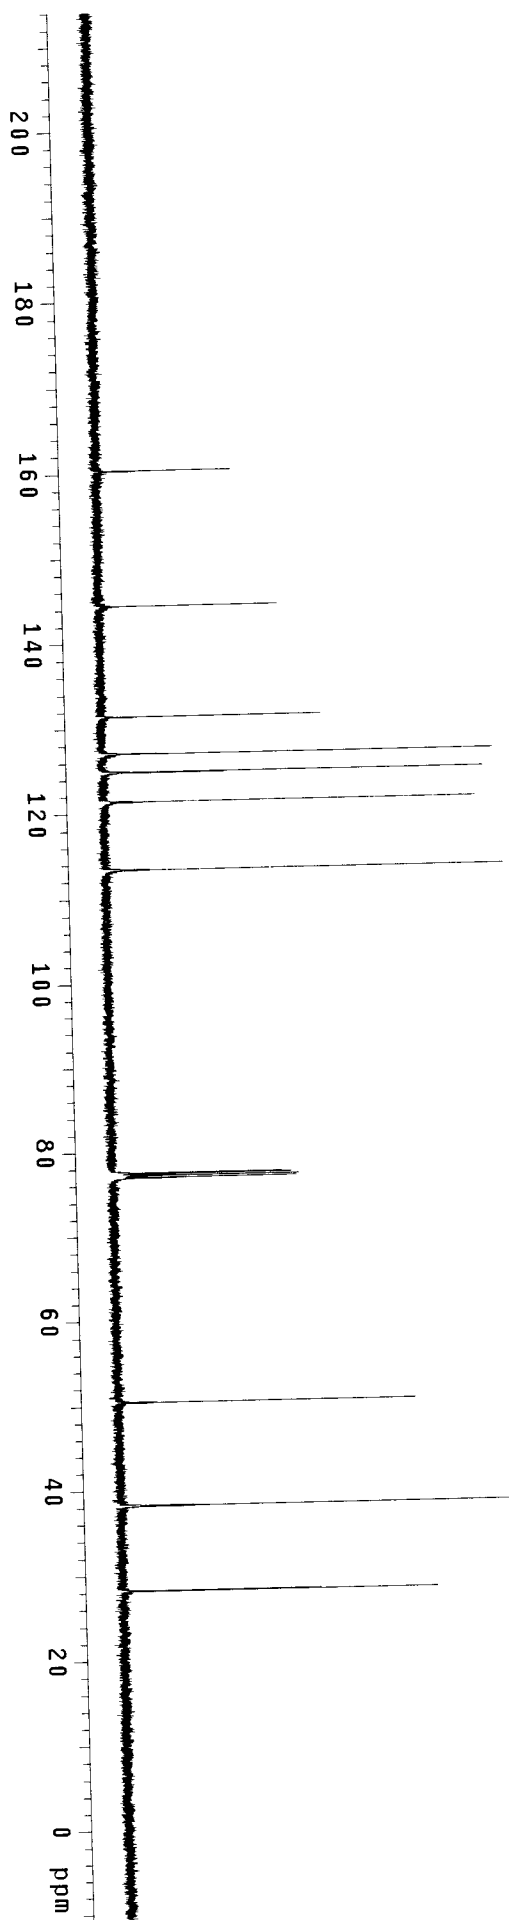

1n

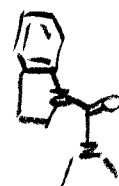

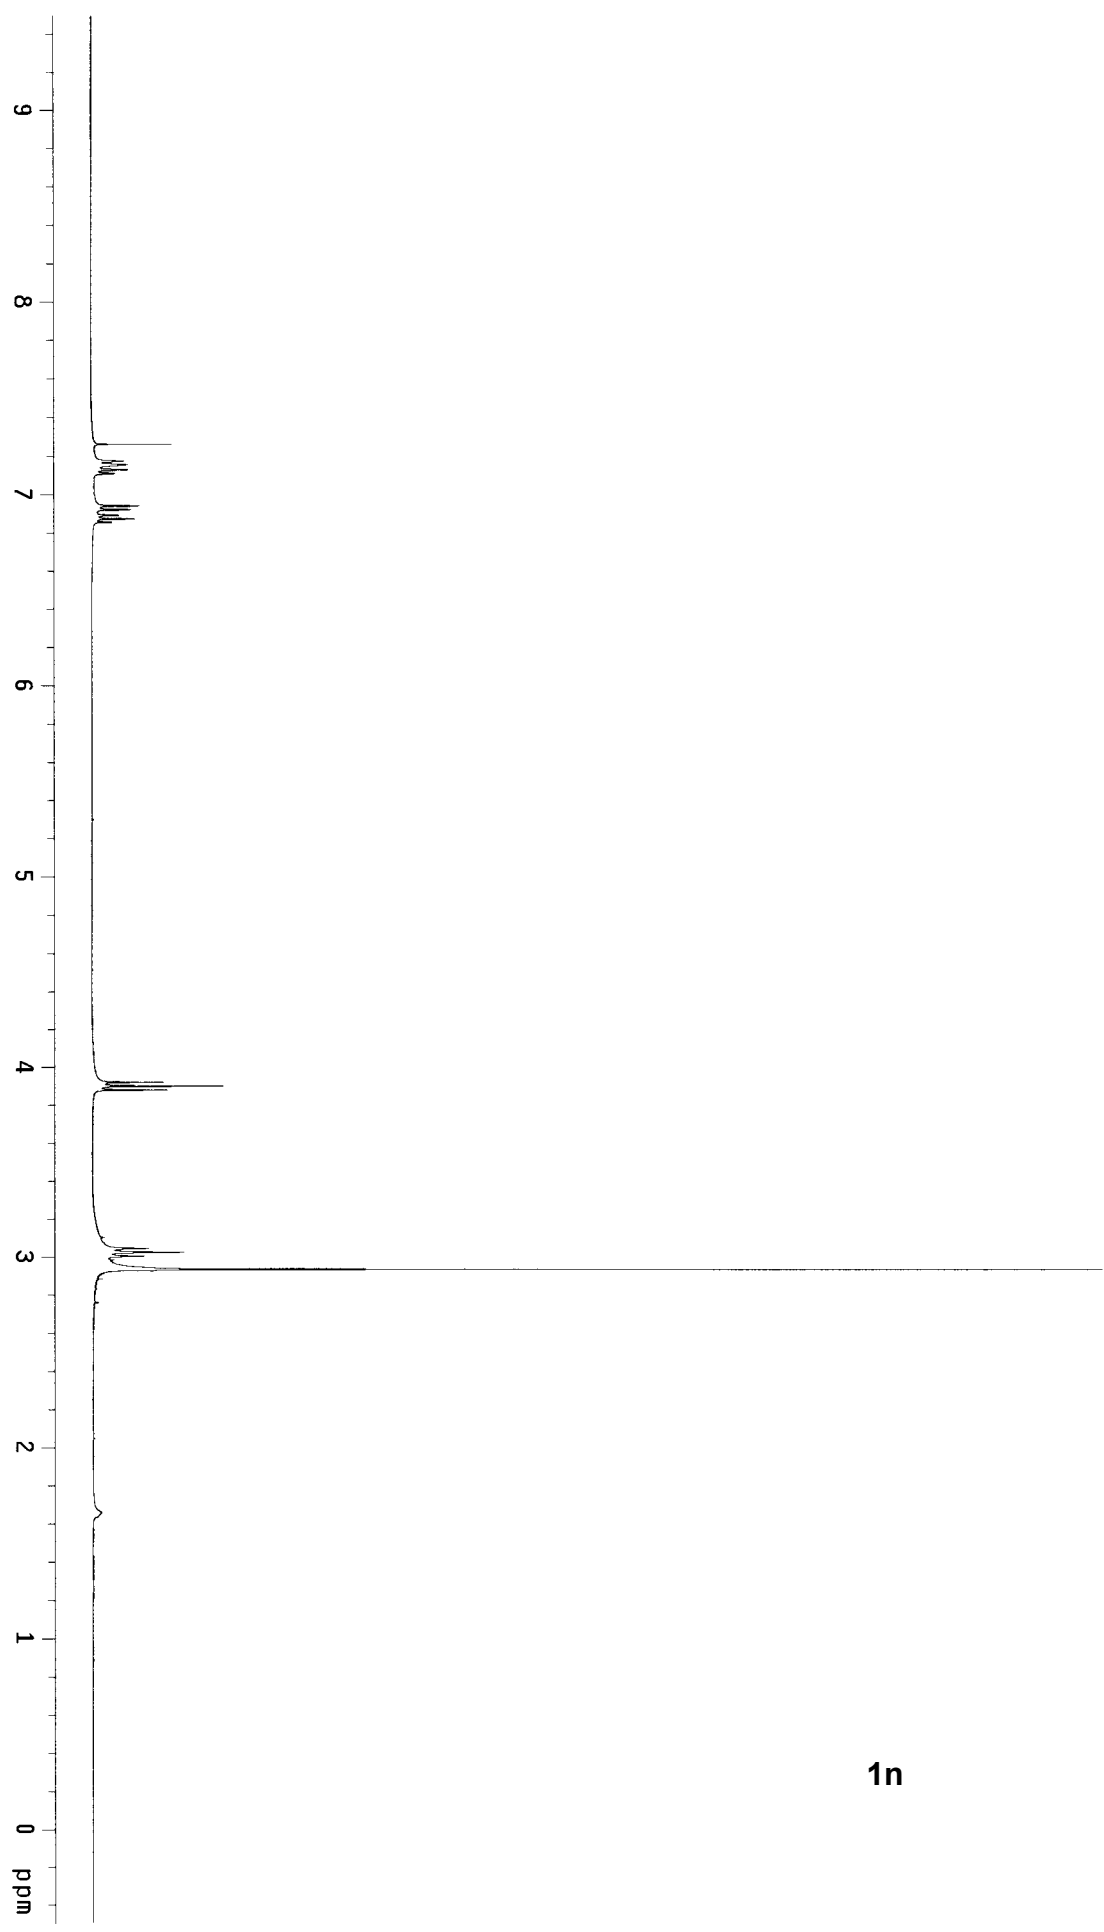

1n

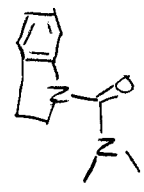

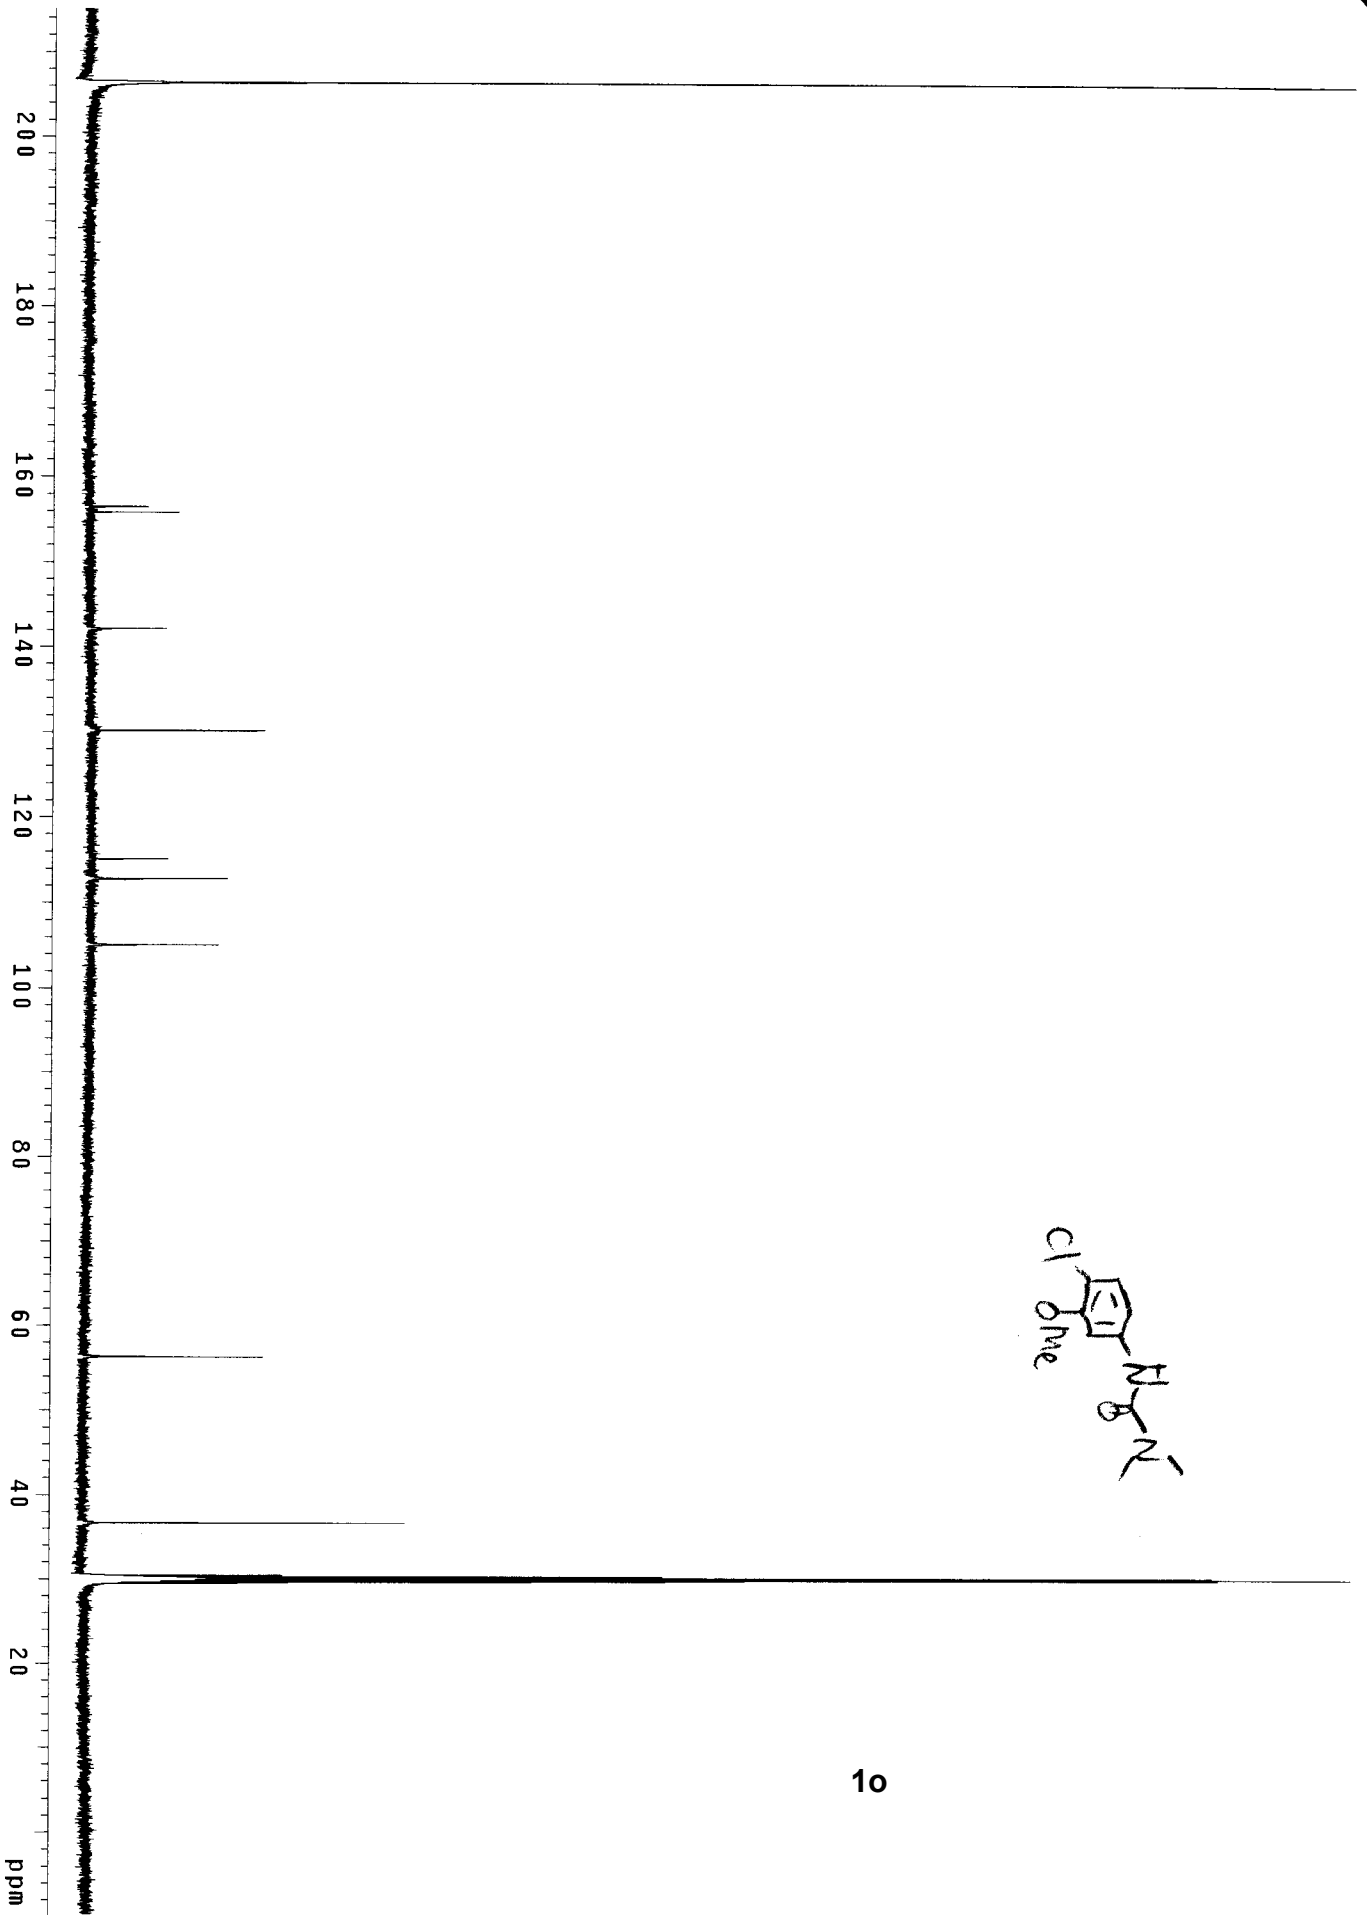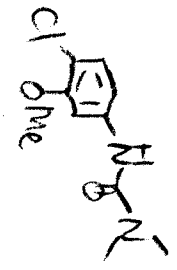

10

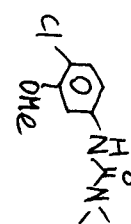

10

10.0

5.0

0.0



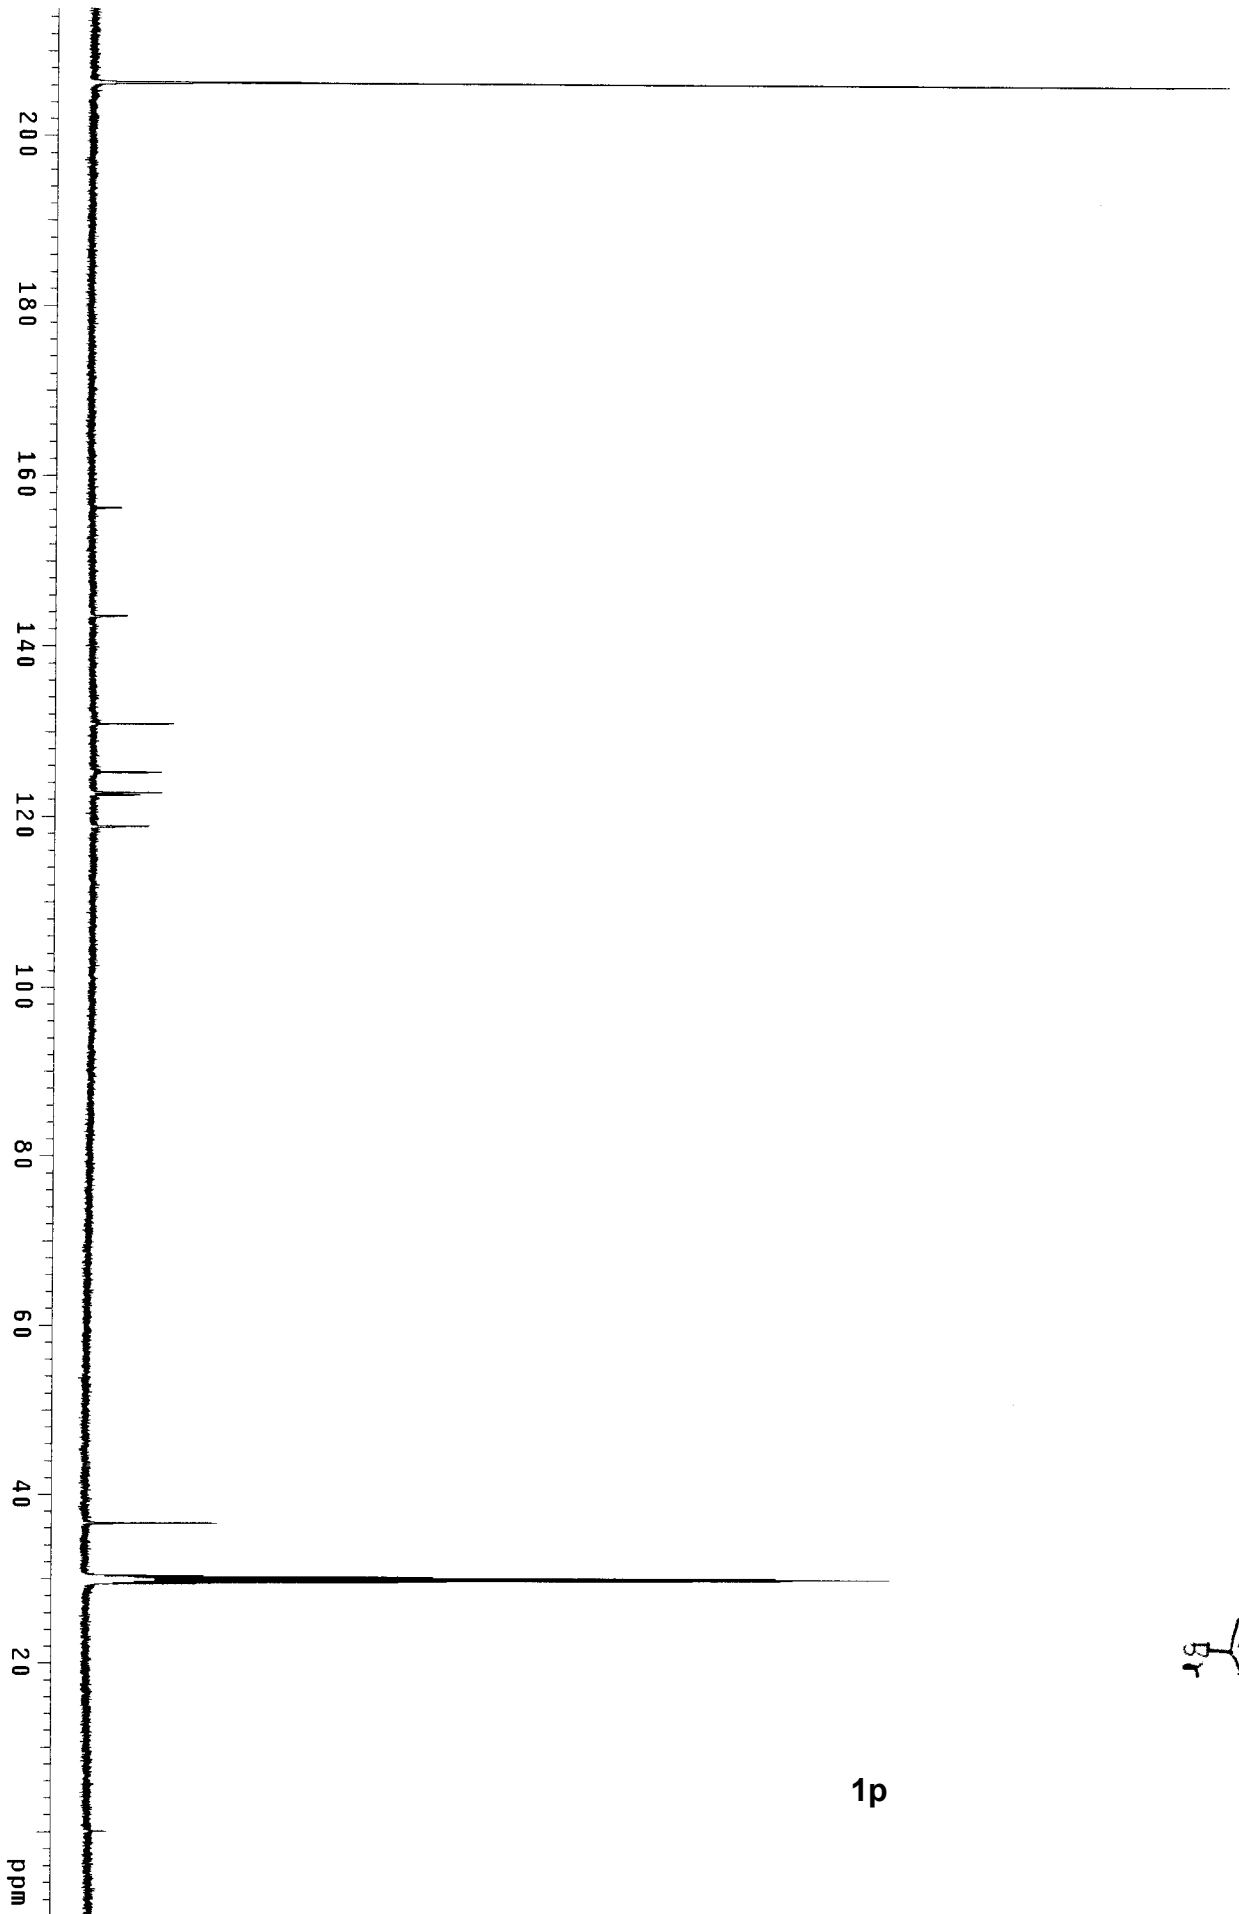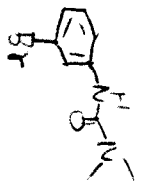

ppm (f1)

10.0

5.0

0.0

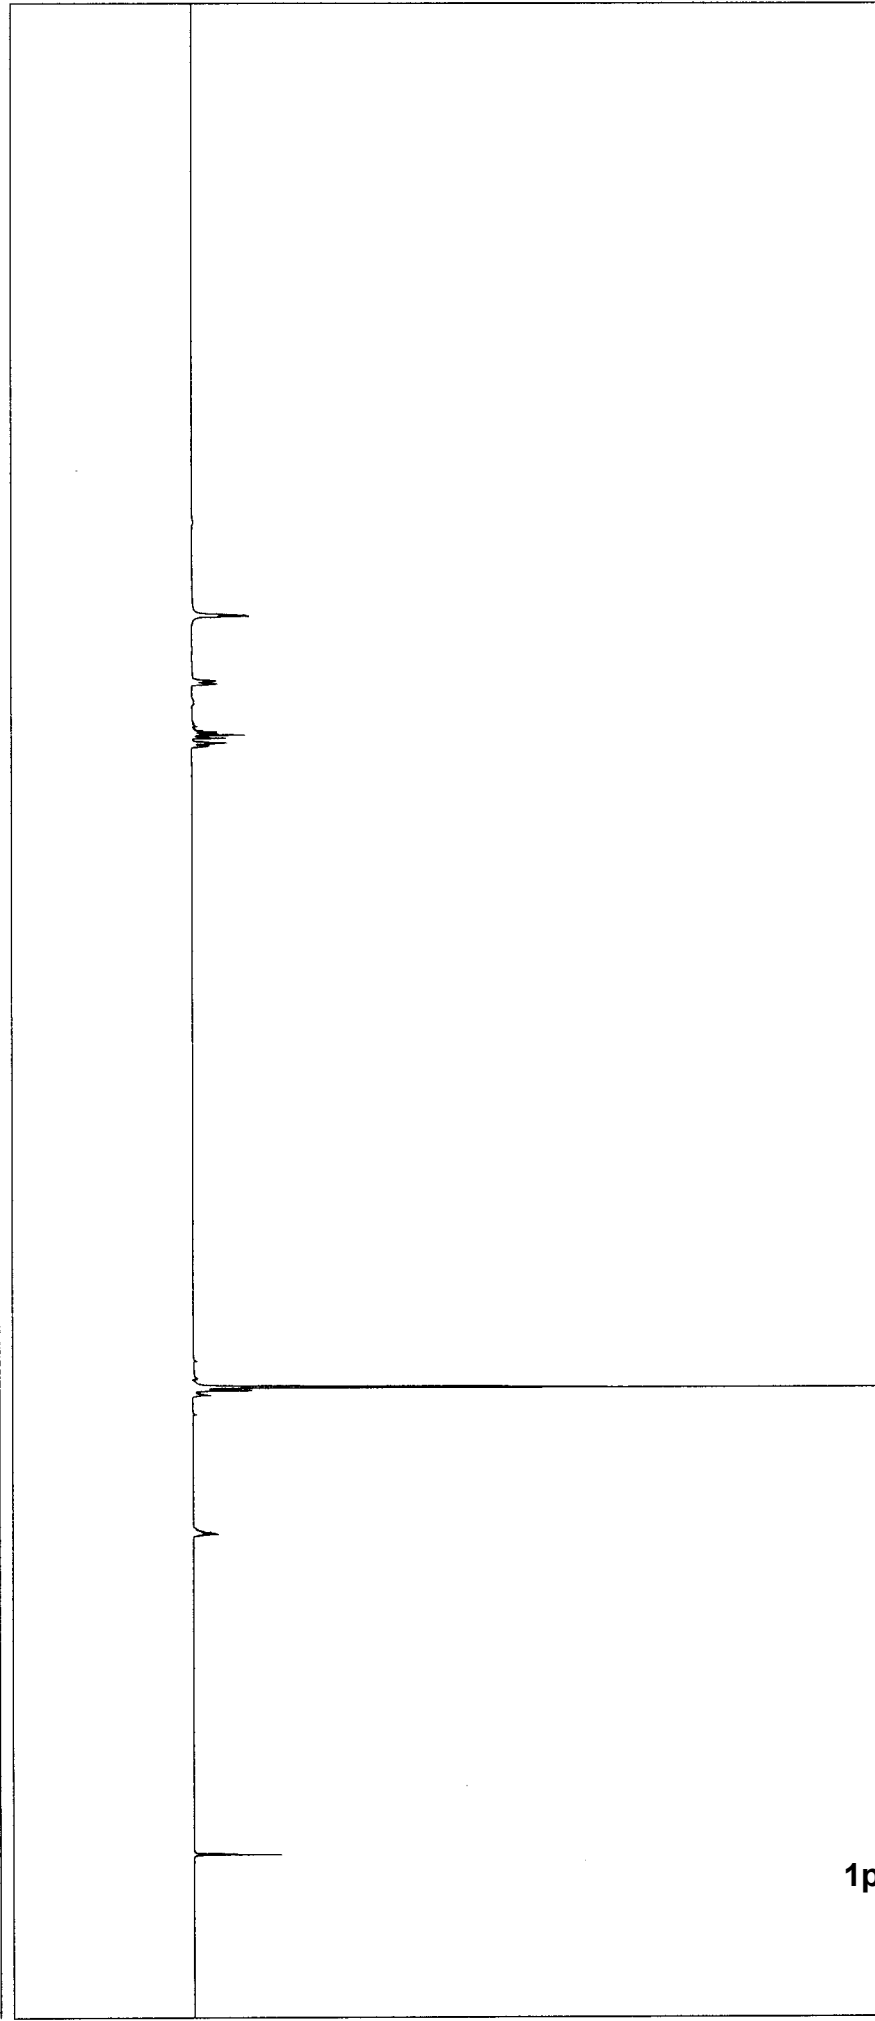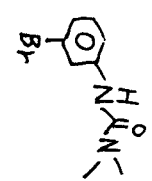

1p

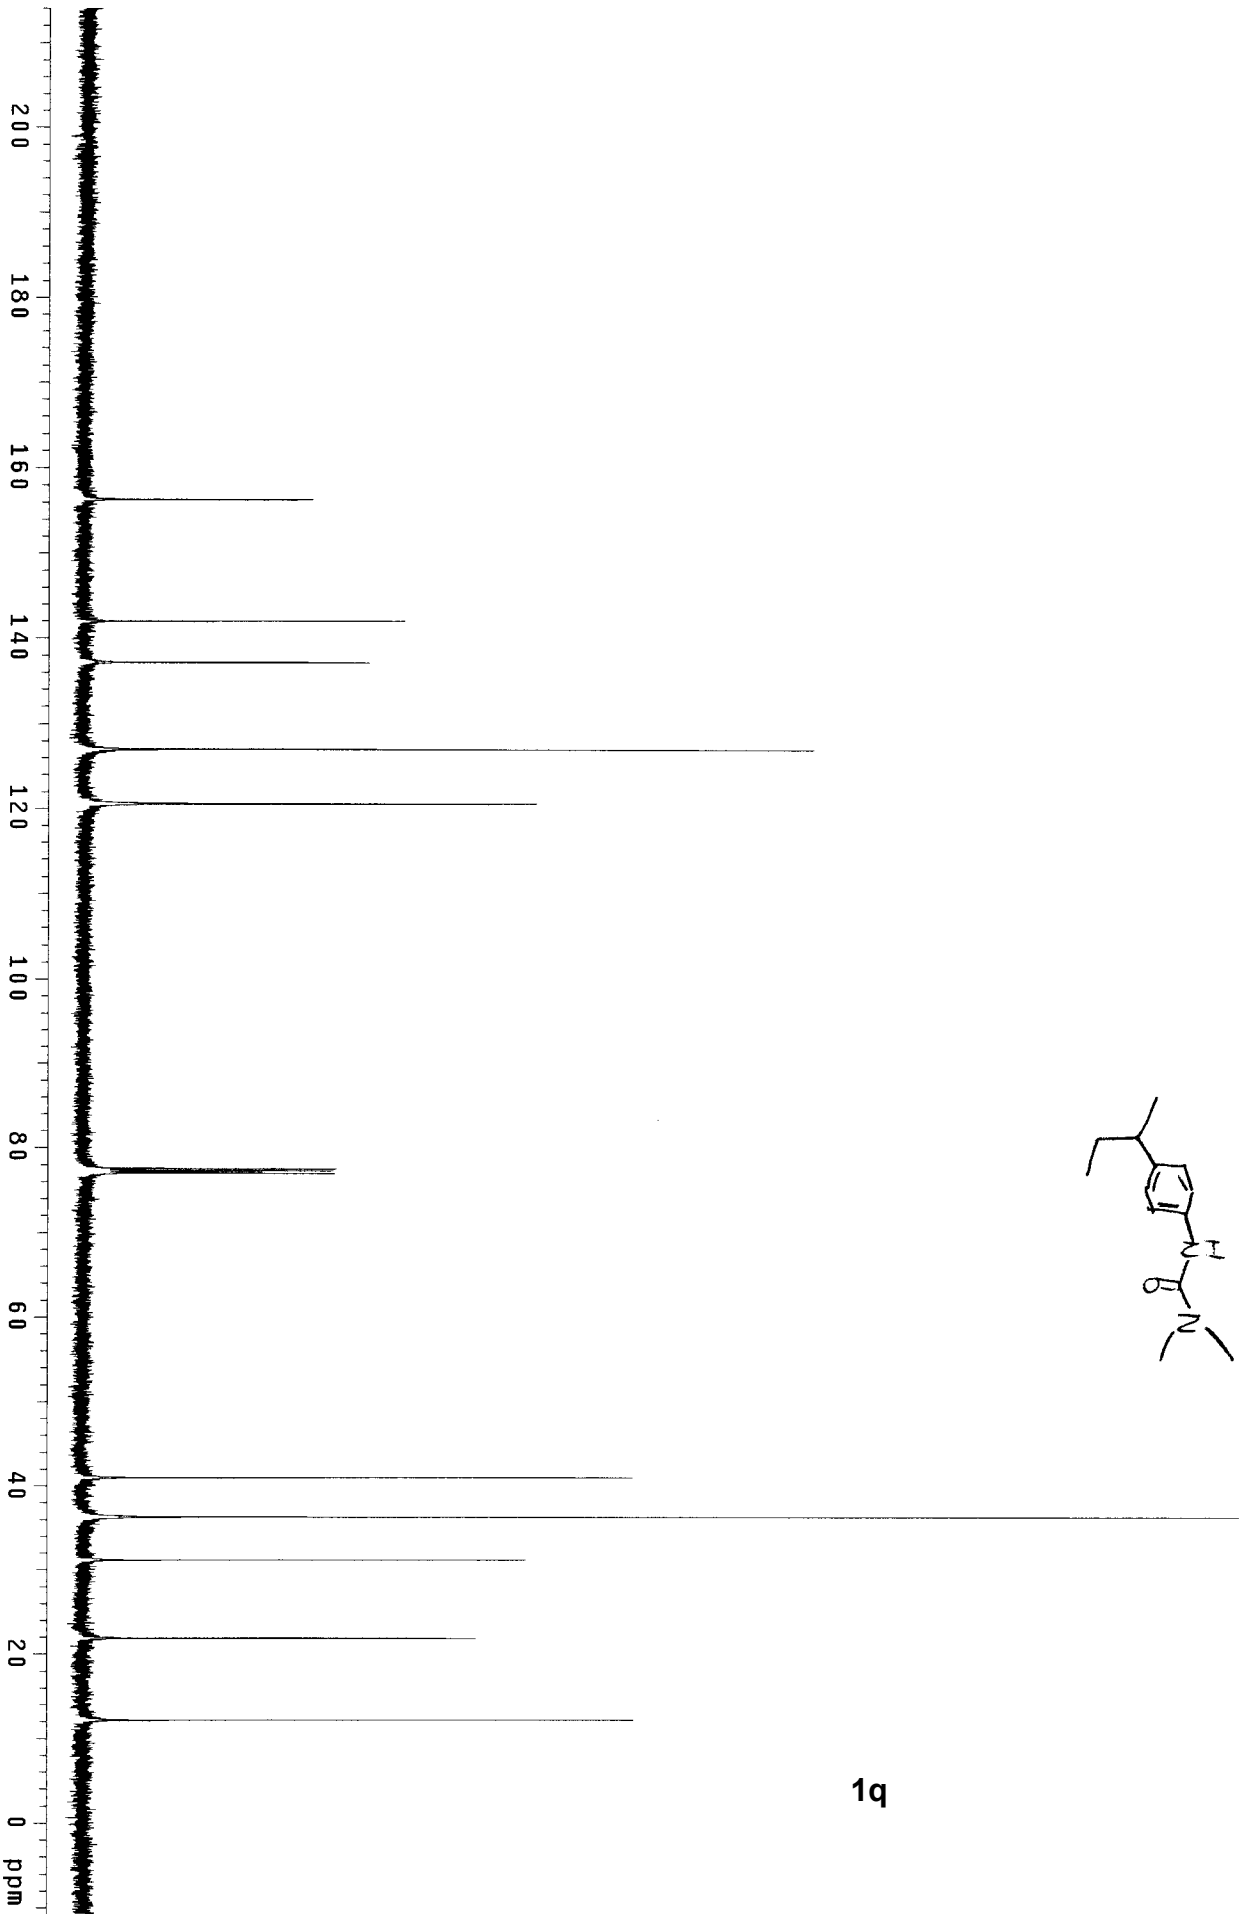

1q

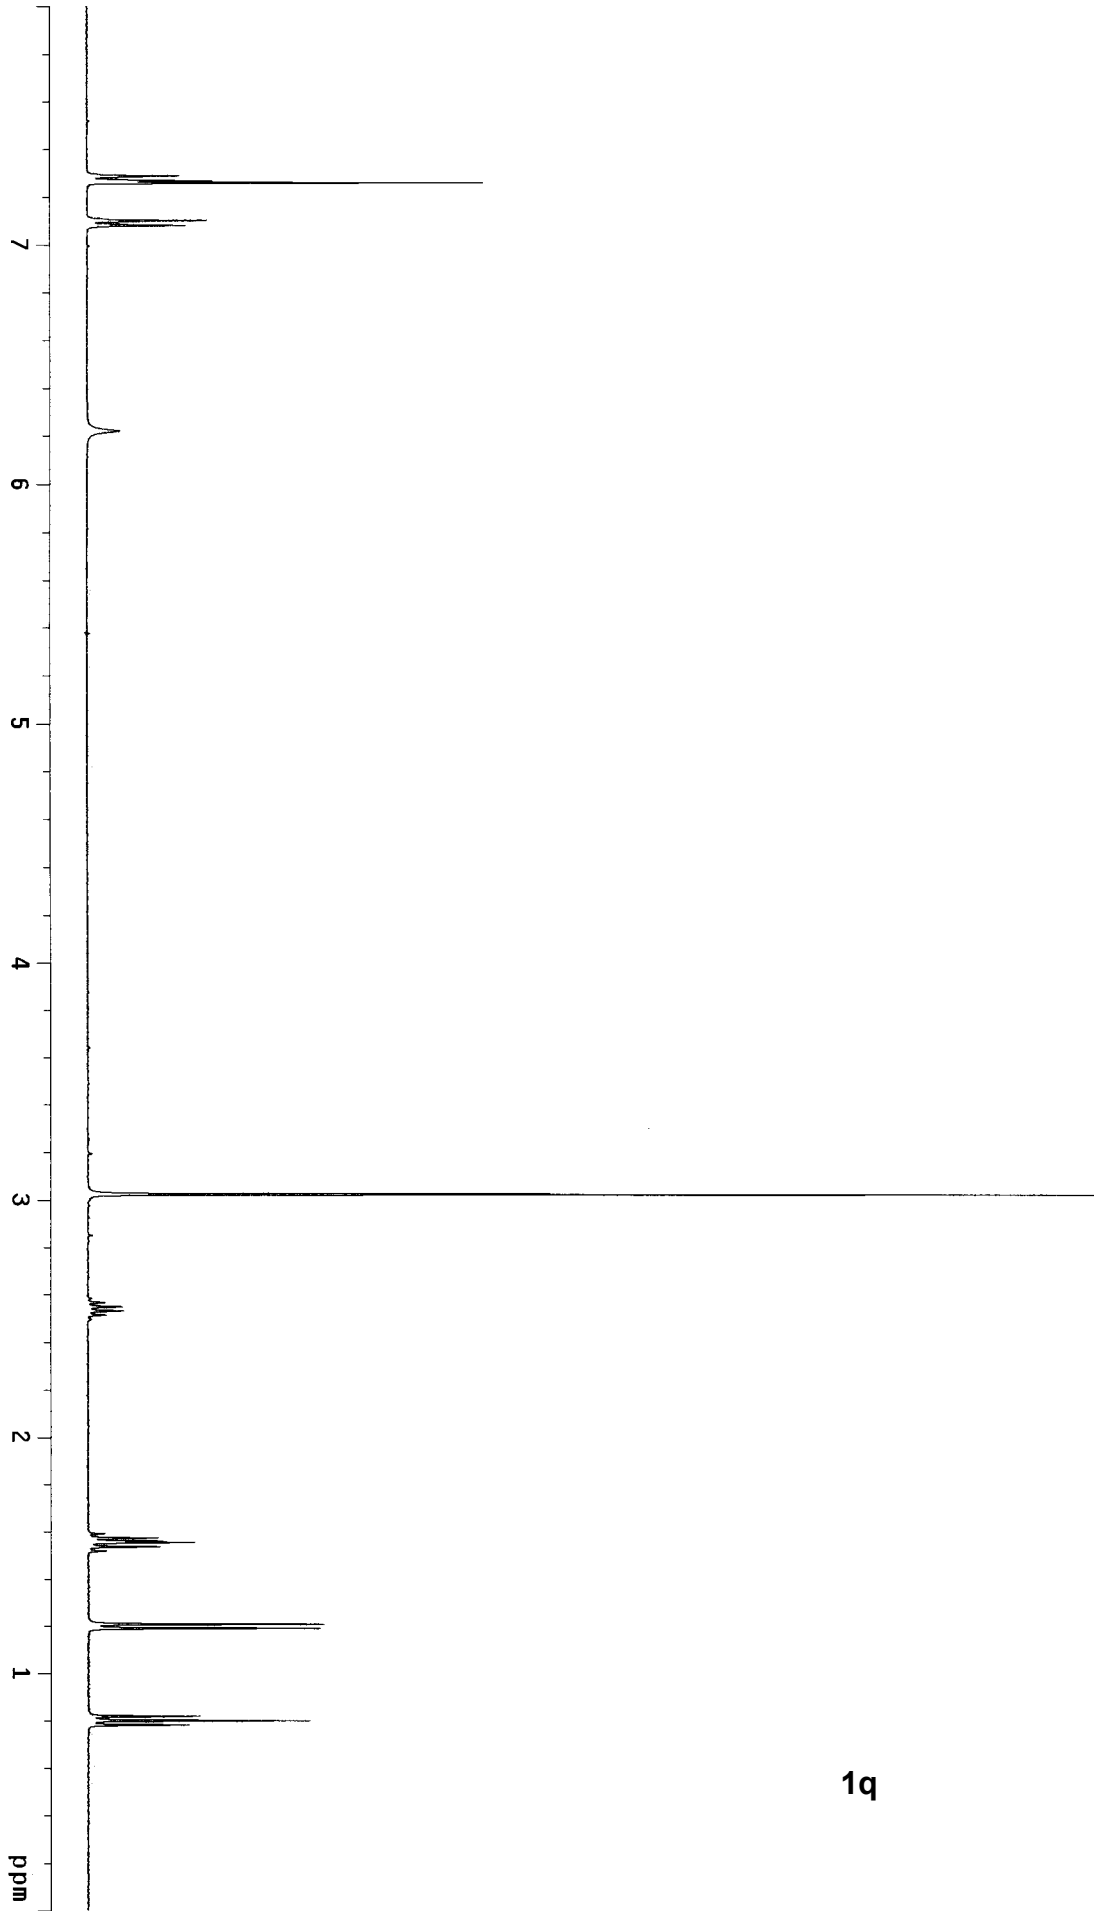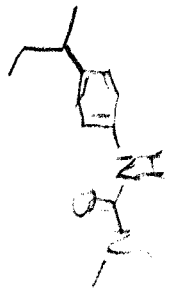

1q

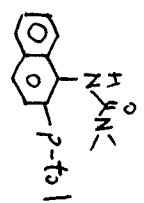

3ii

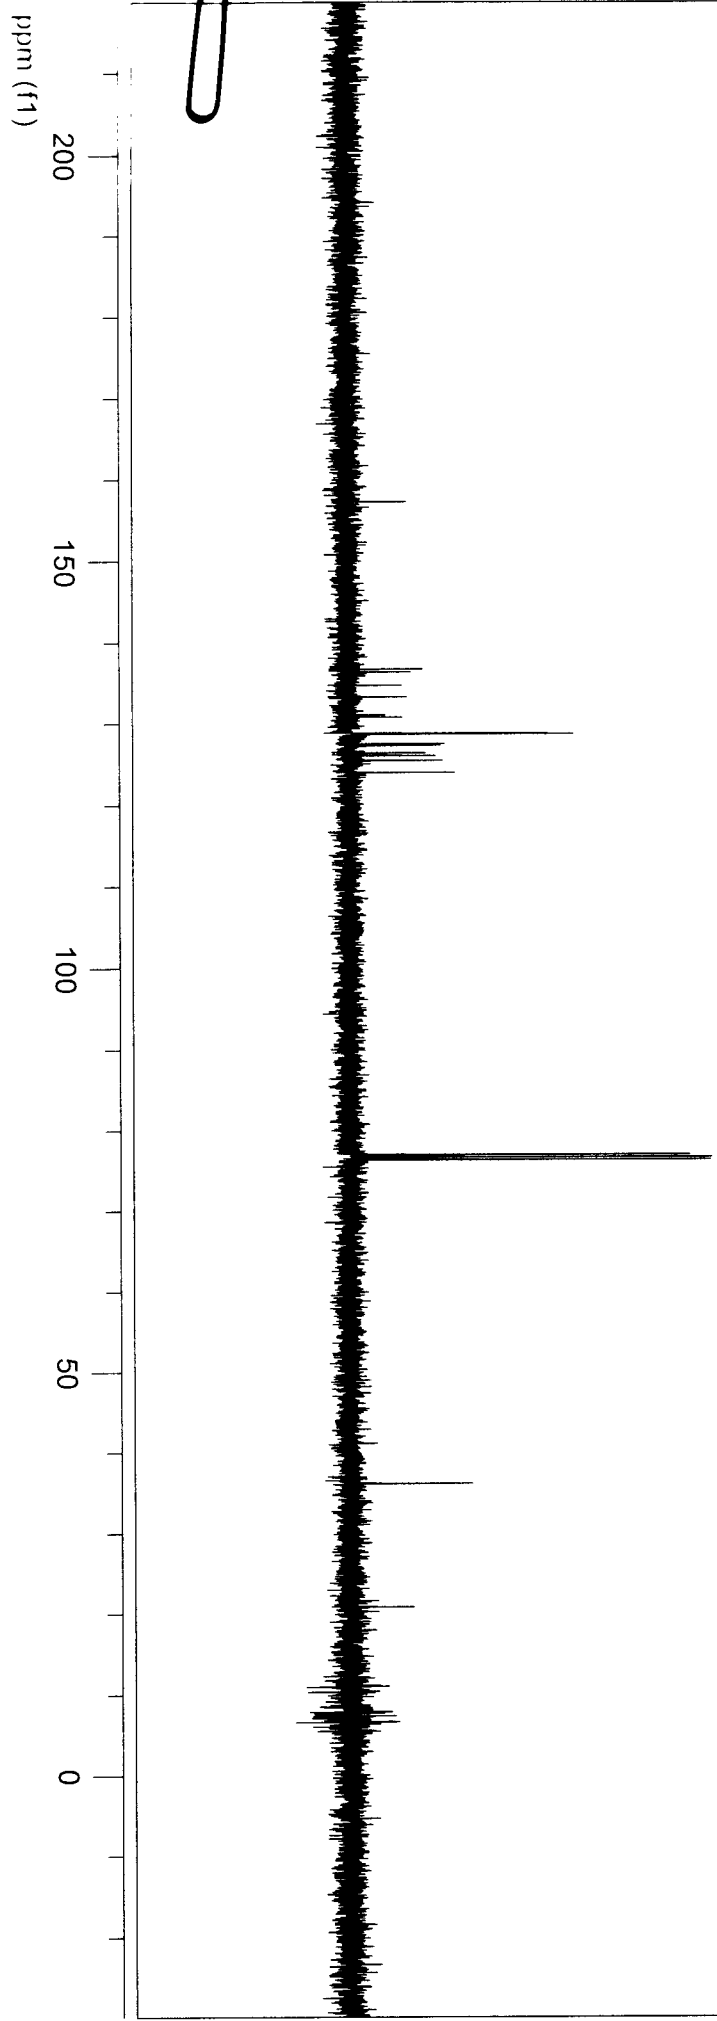

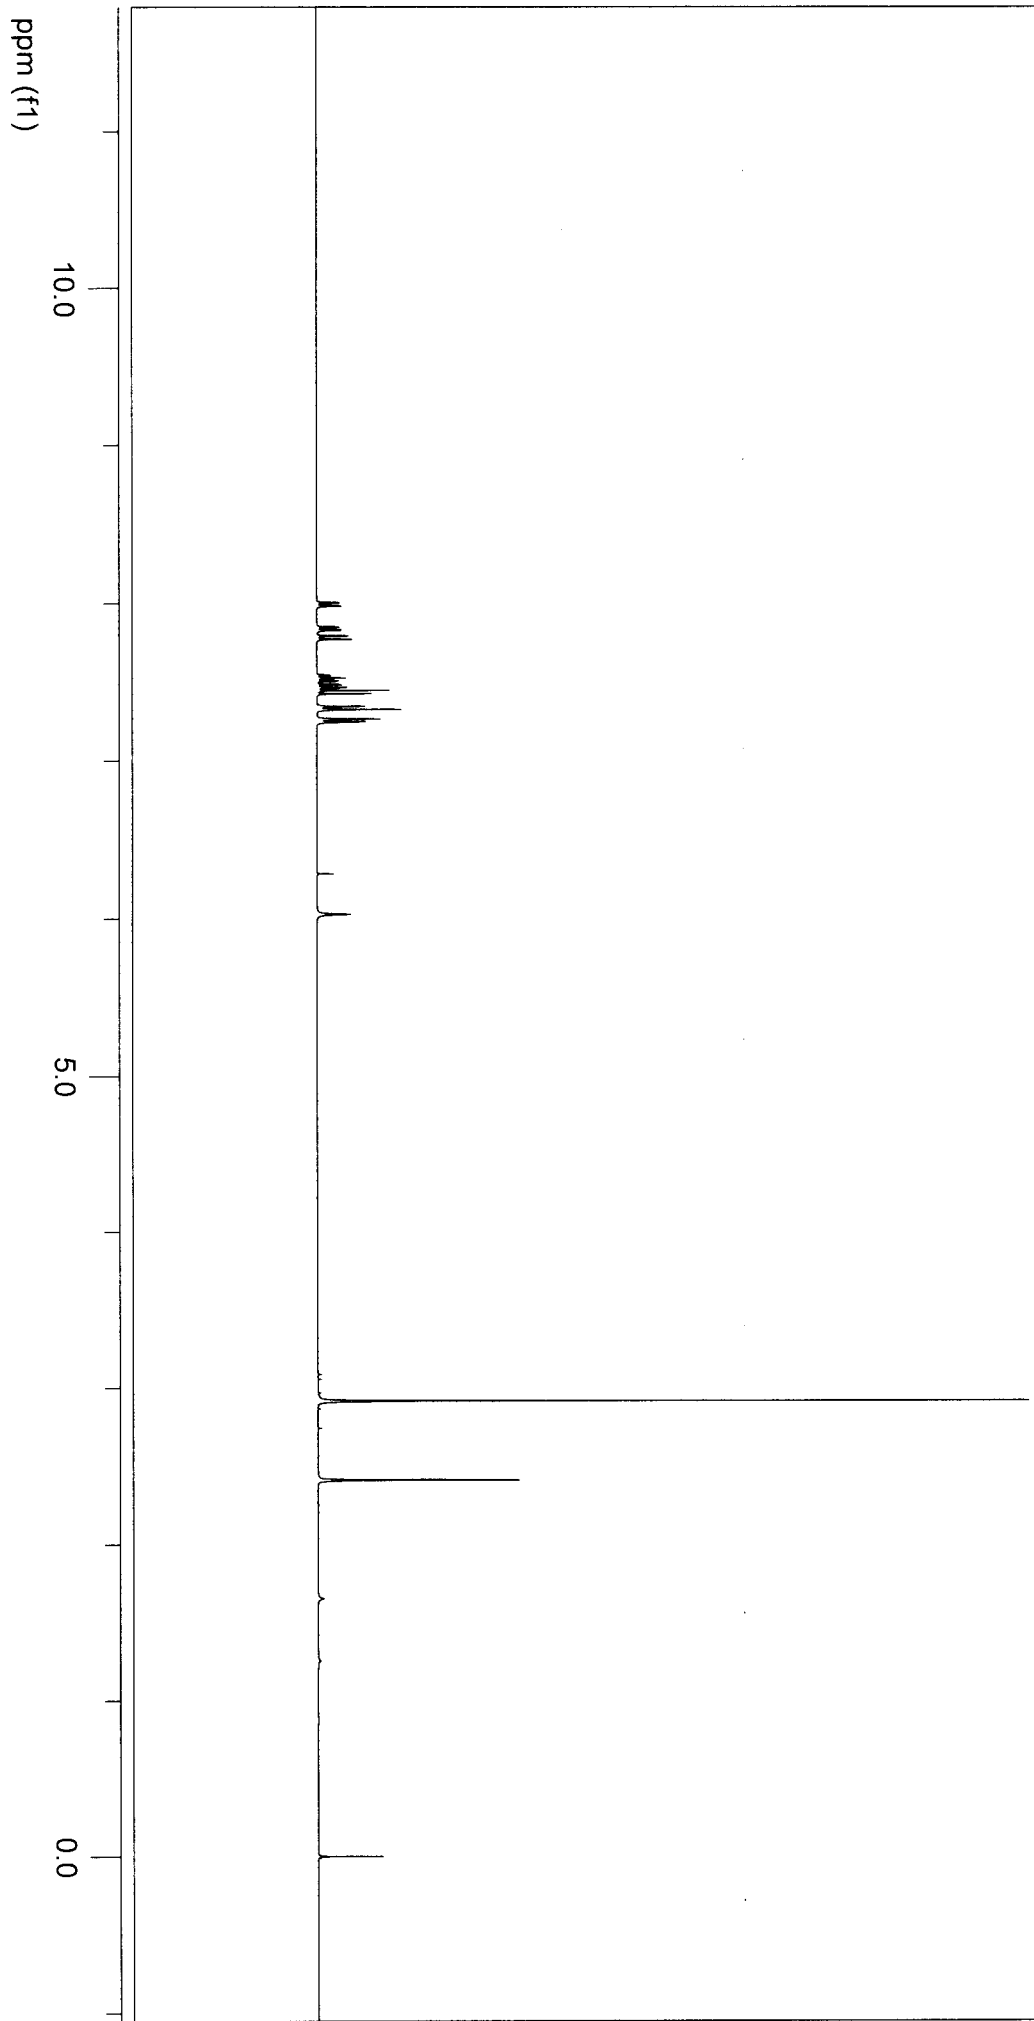

3ii

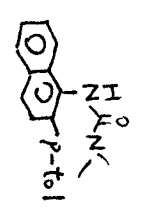

ppm (f1)

200  
150  
100  
50  
0

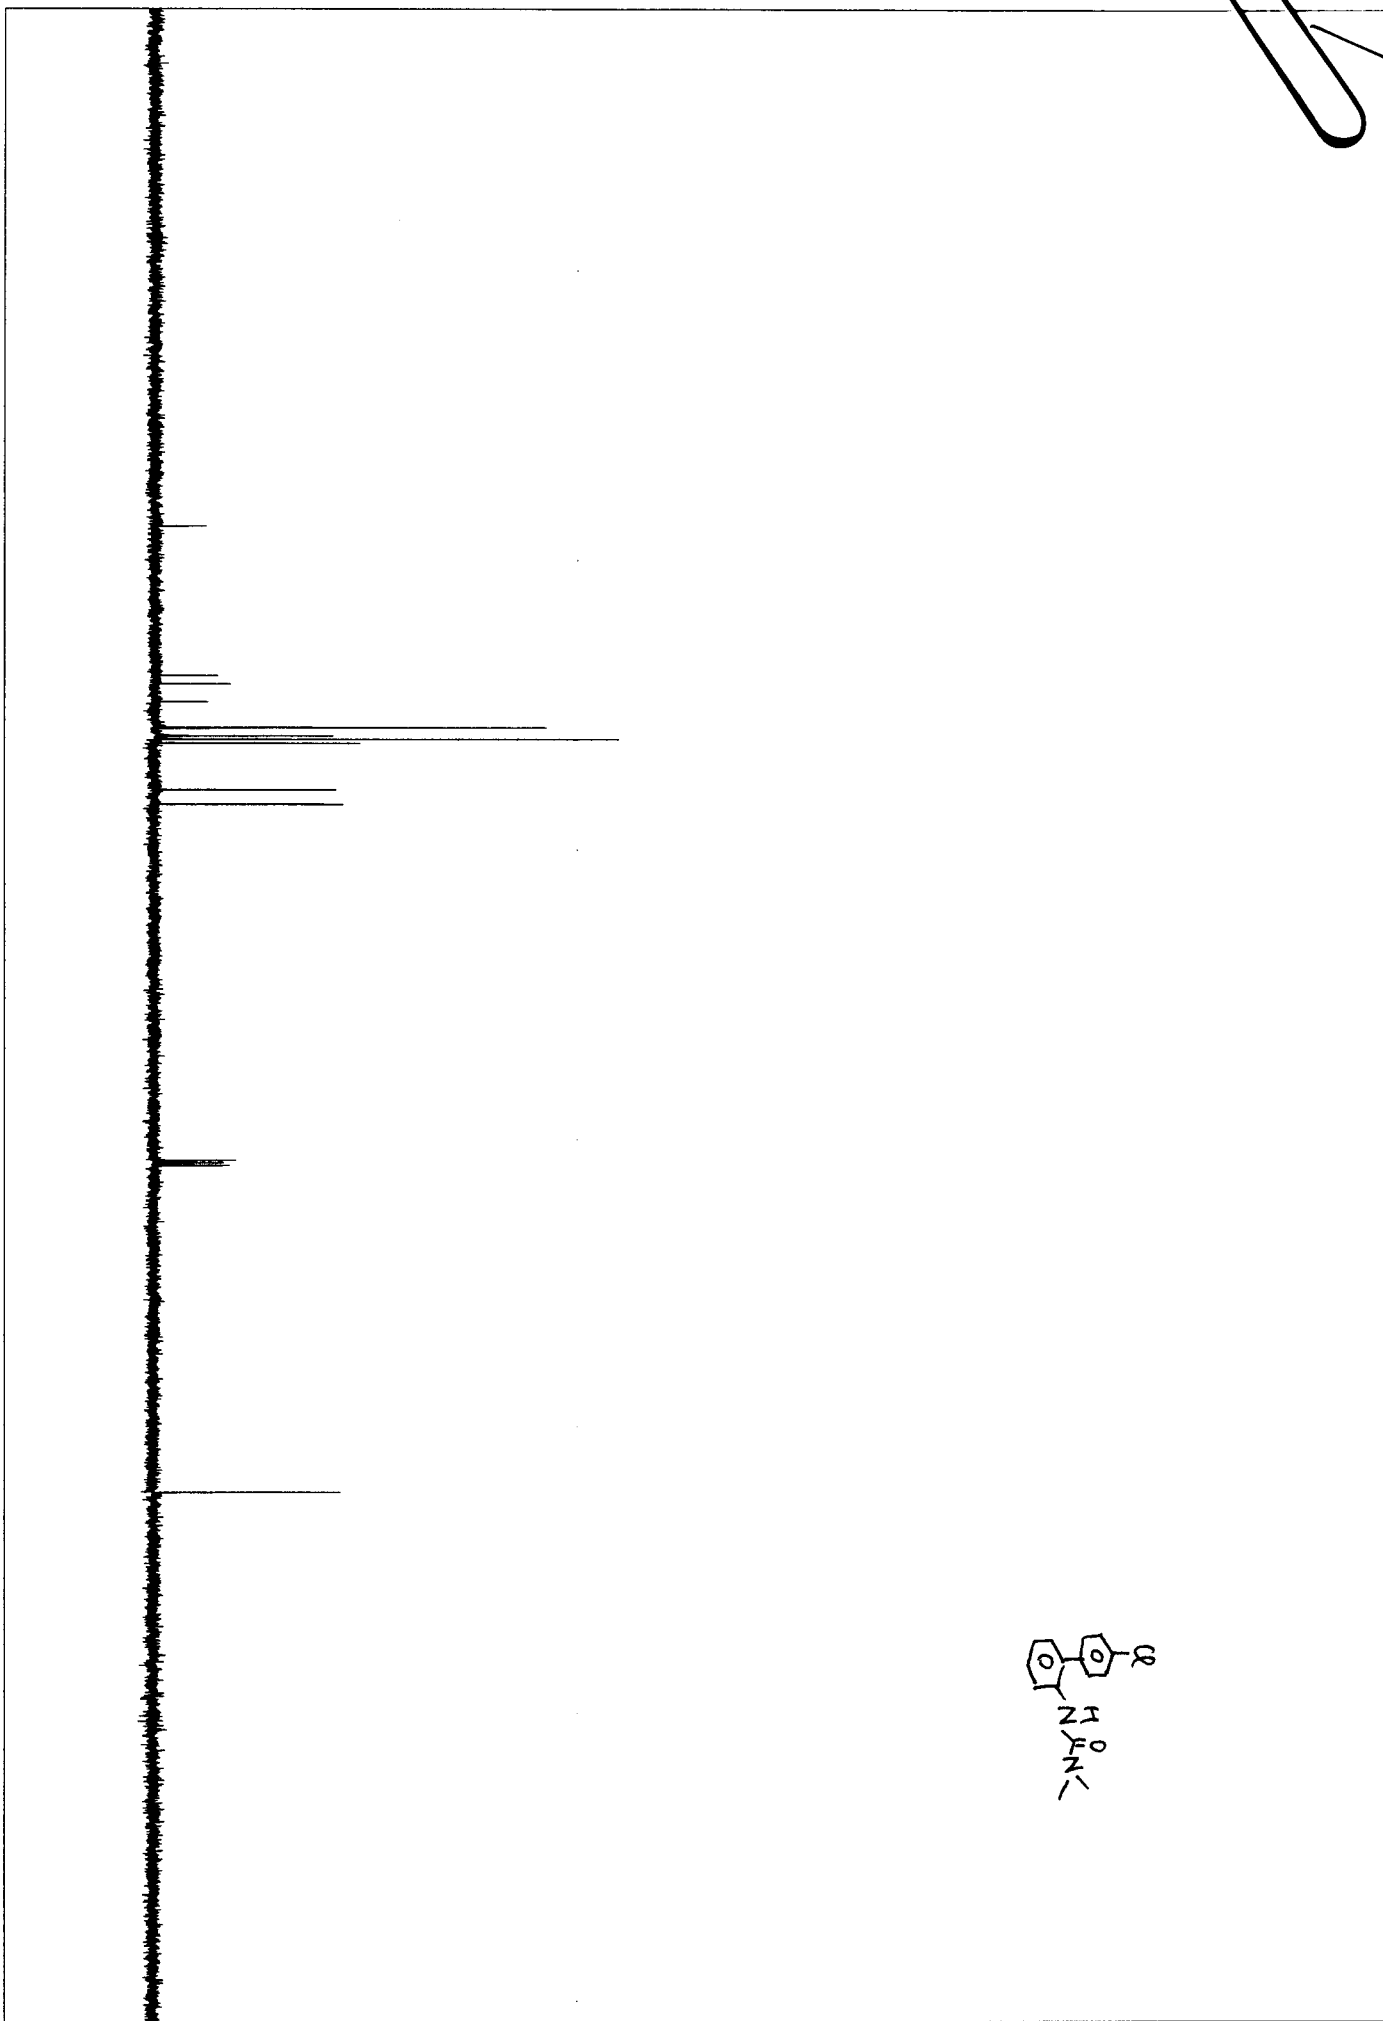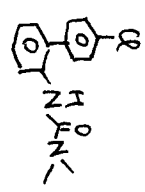

10.0

5.0

0.0

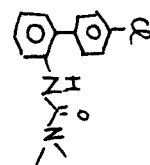



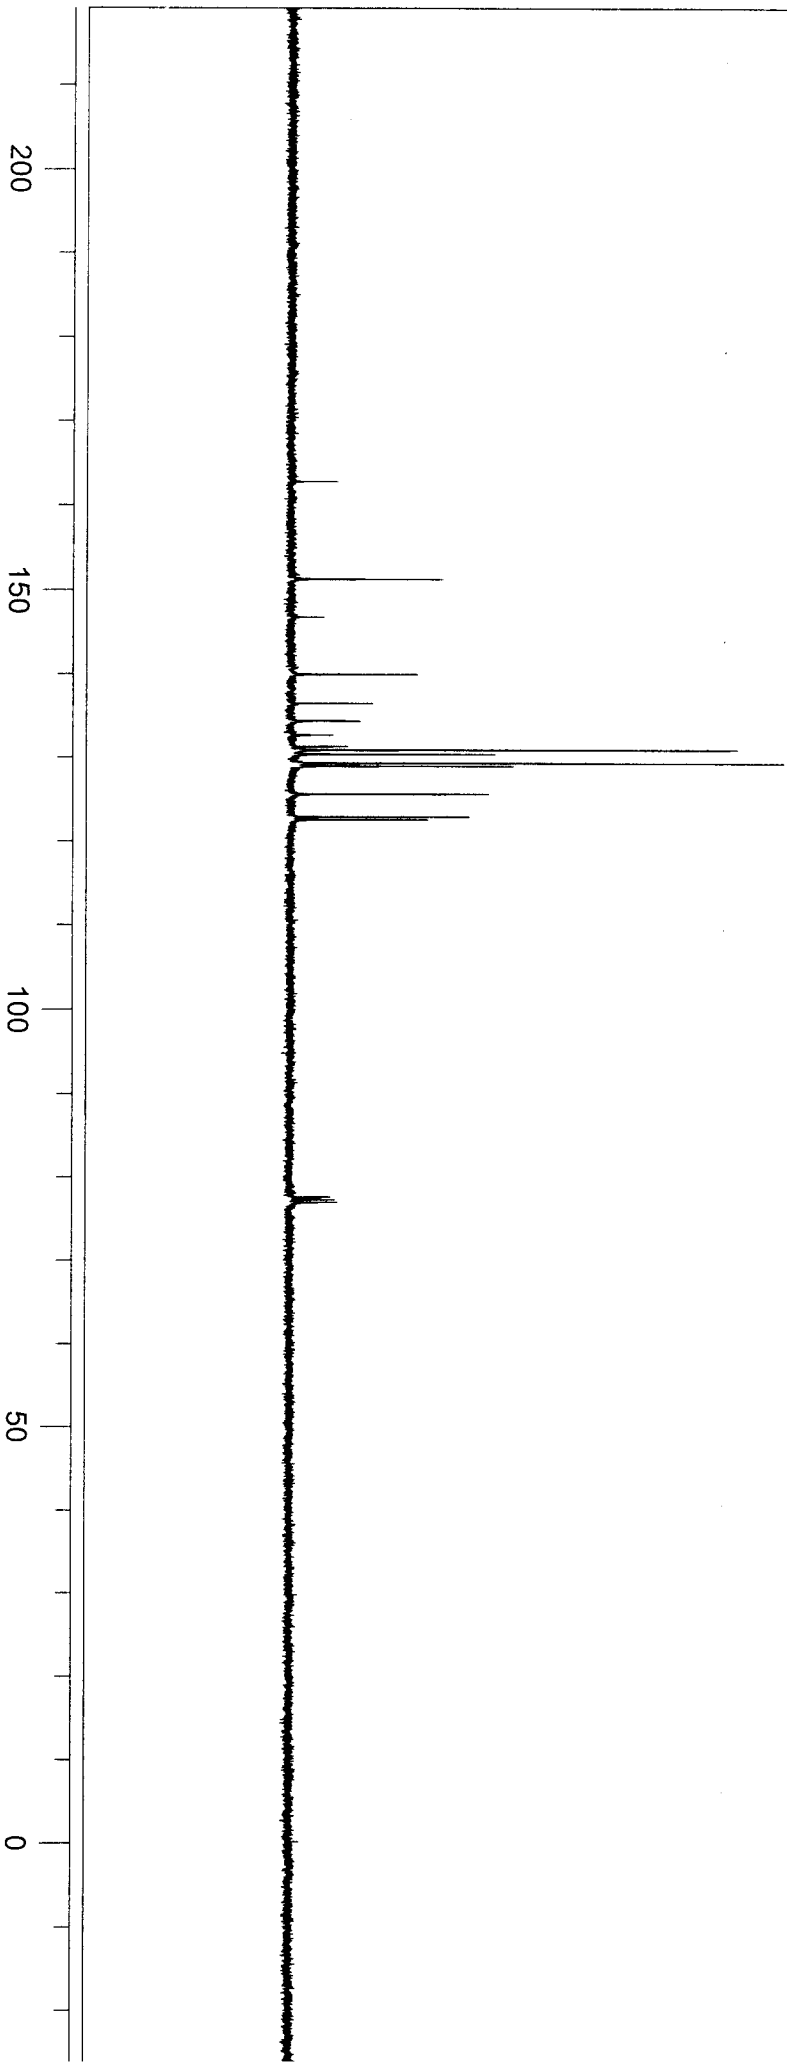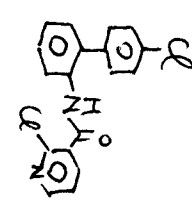

**Boscalid**

ppm (f1)

10.0

5.0

0.0

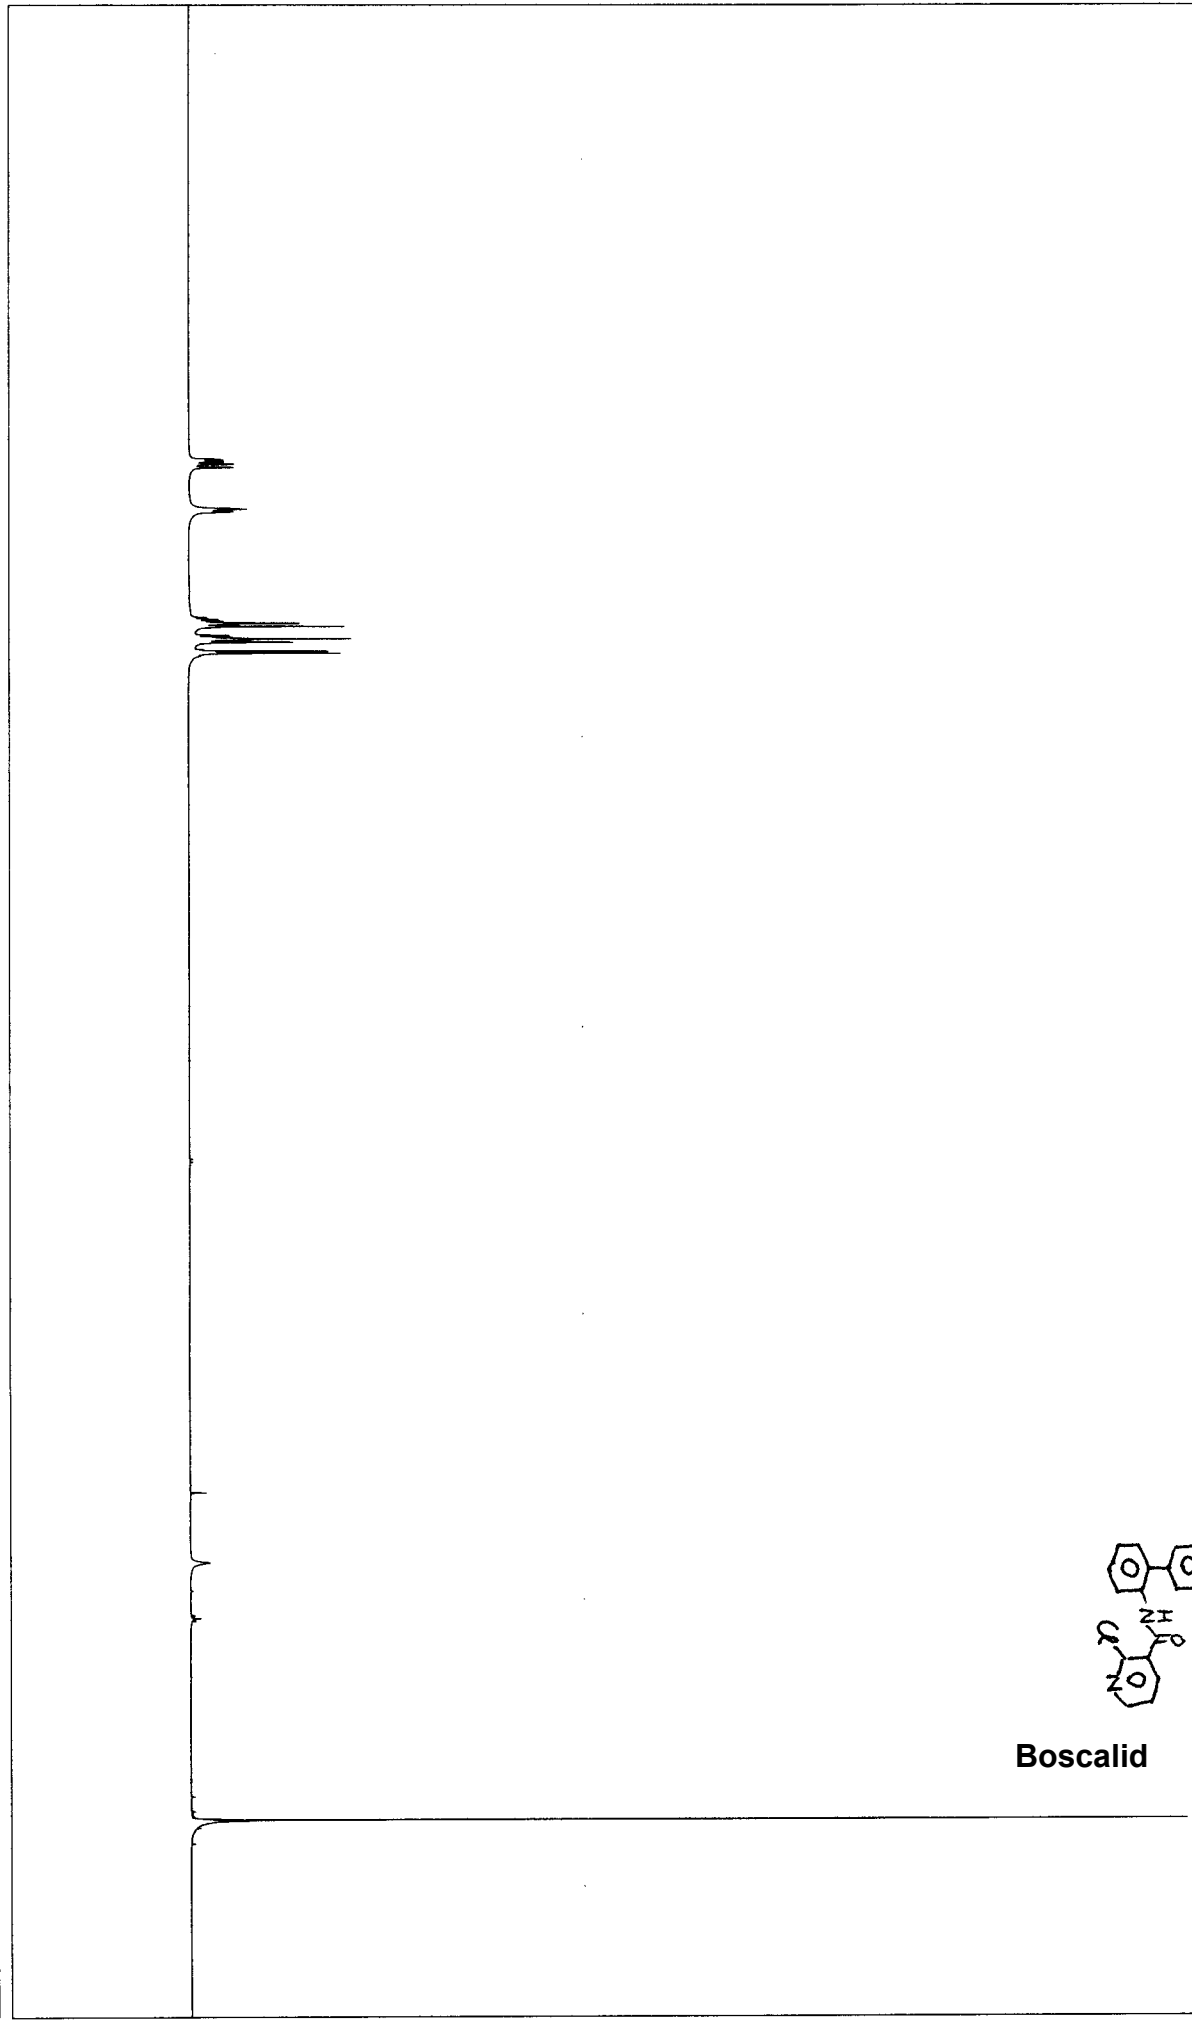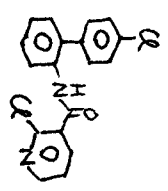

**Boscalid**

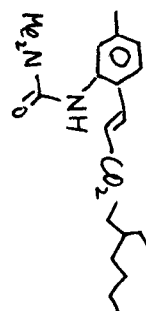

5d

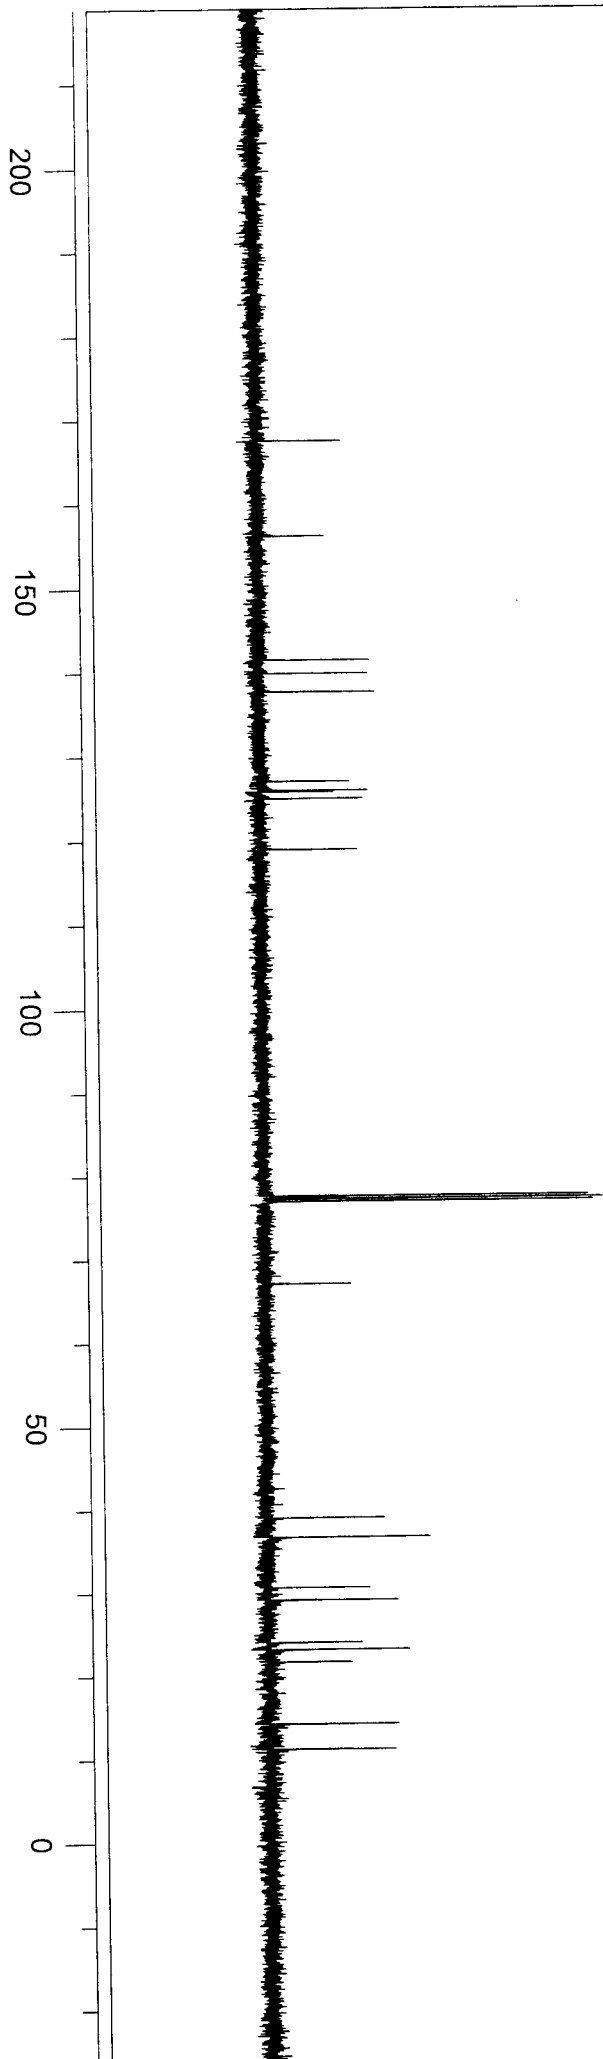

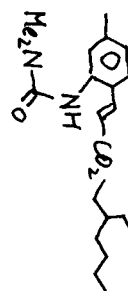

5d

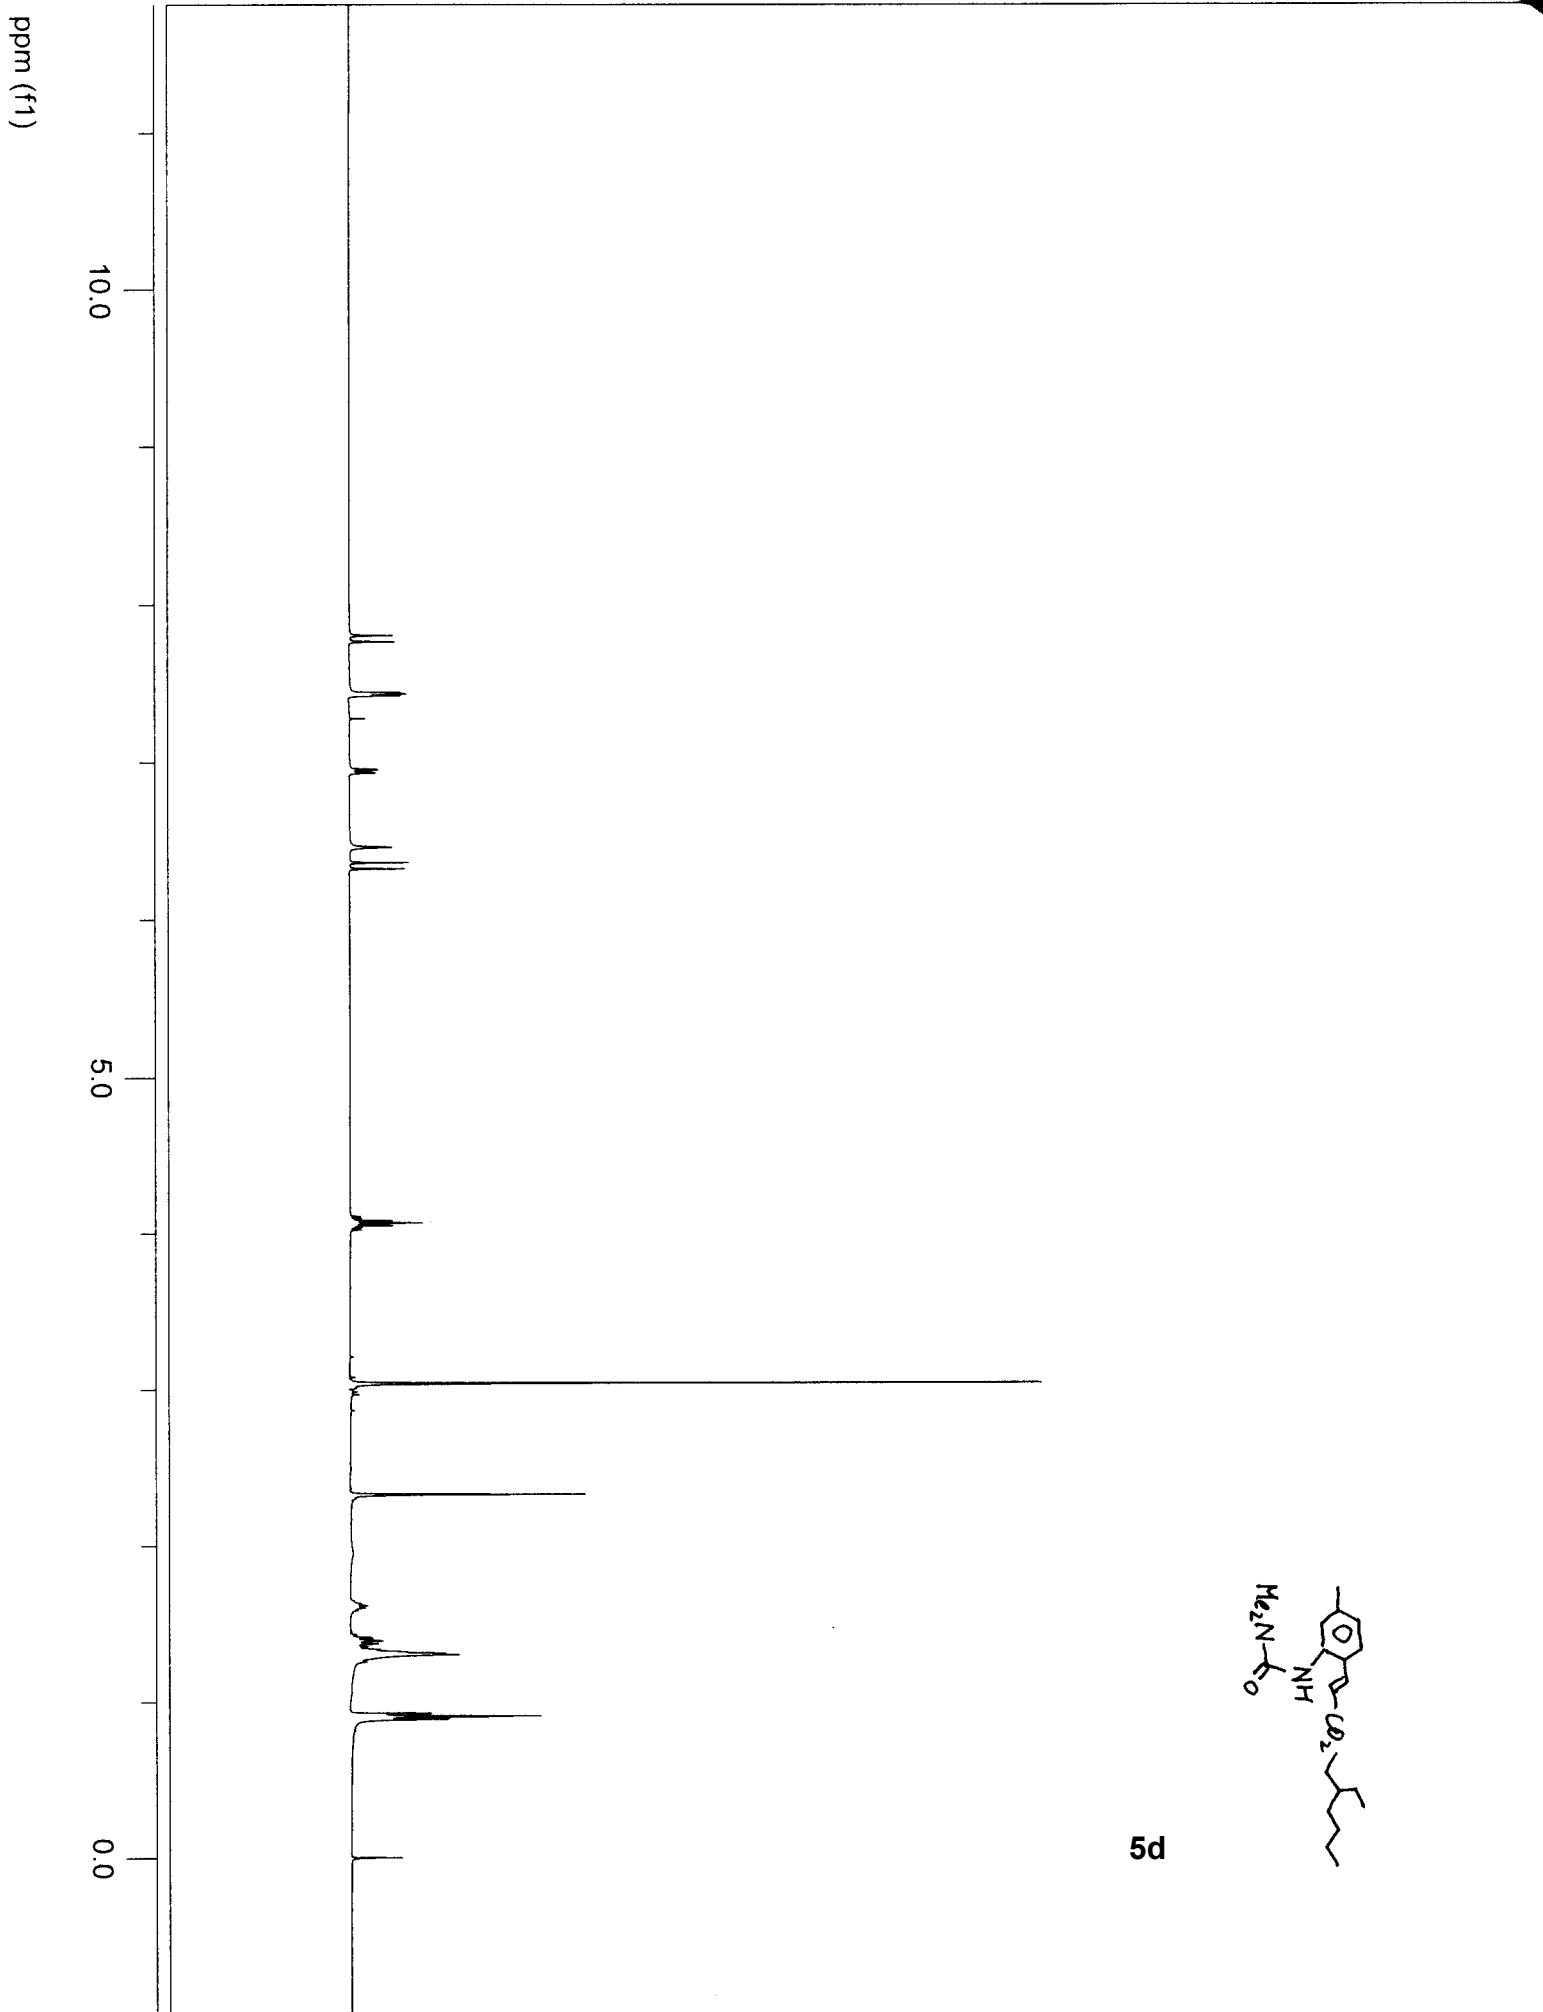

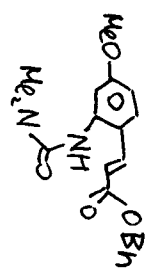

5e

ppm (f1)

200  
150  
100  
50  
0

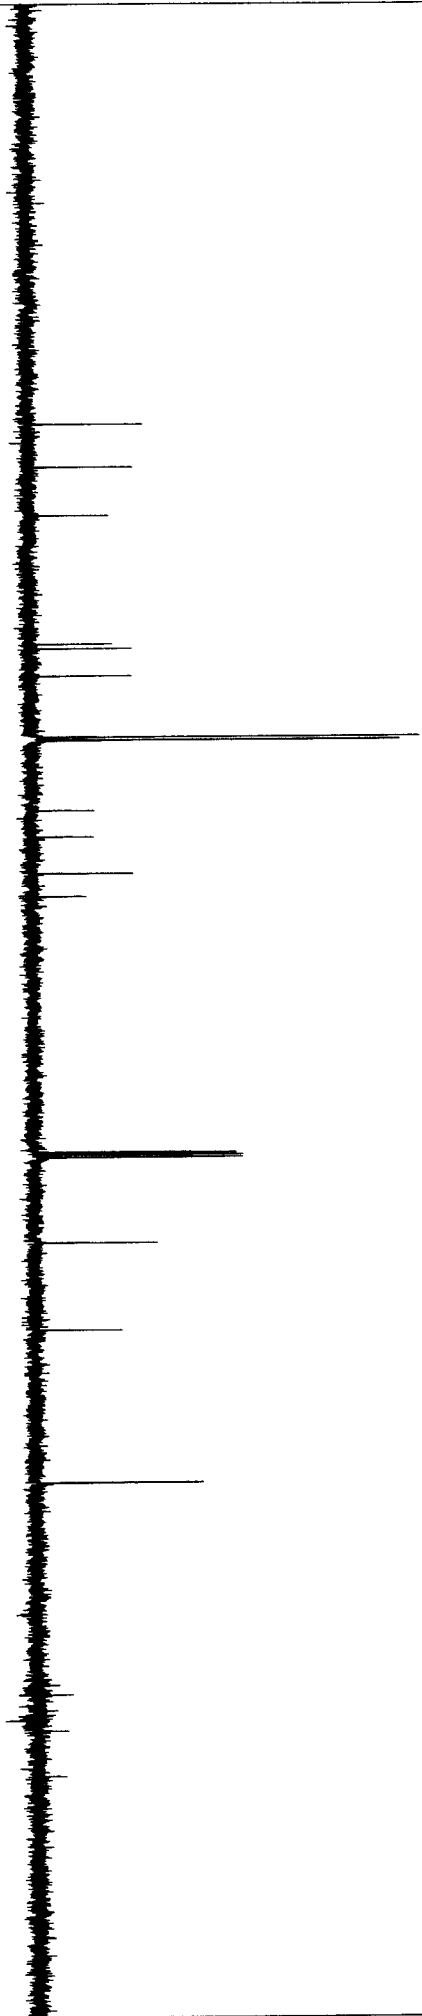

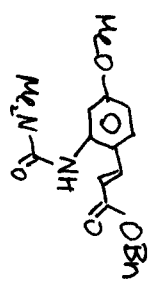

5e

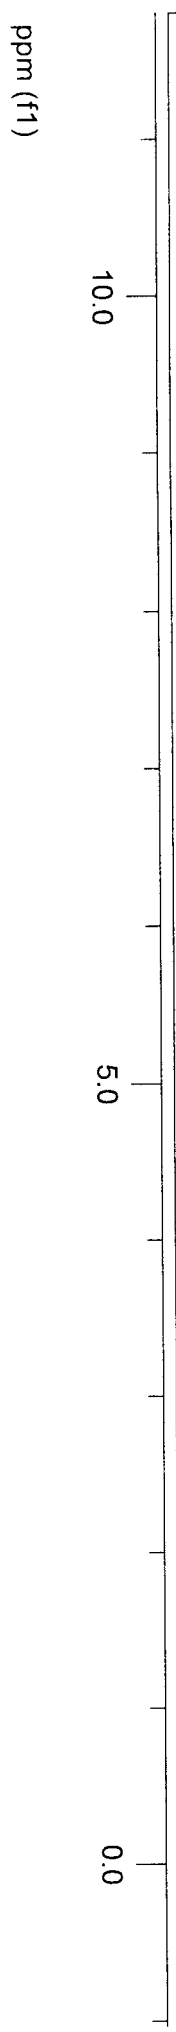

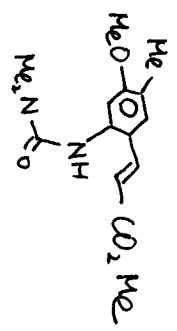

5f

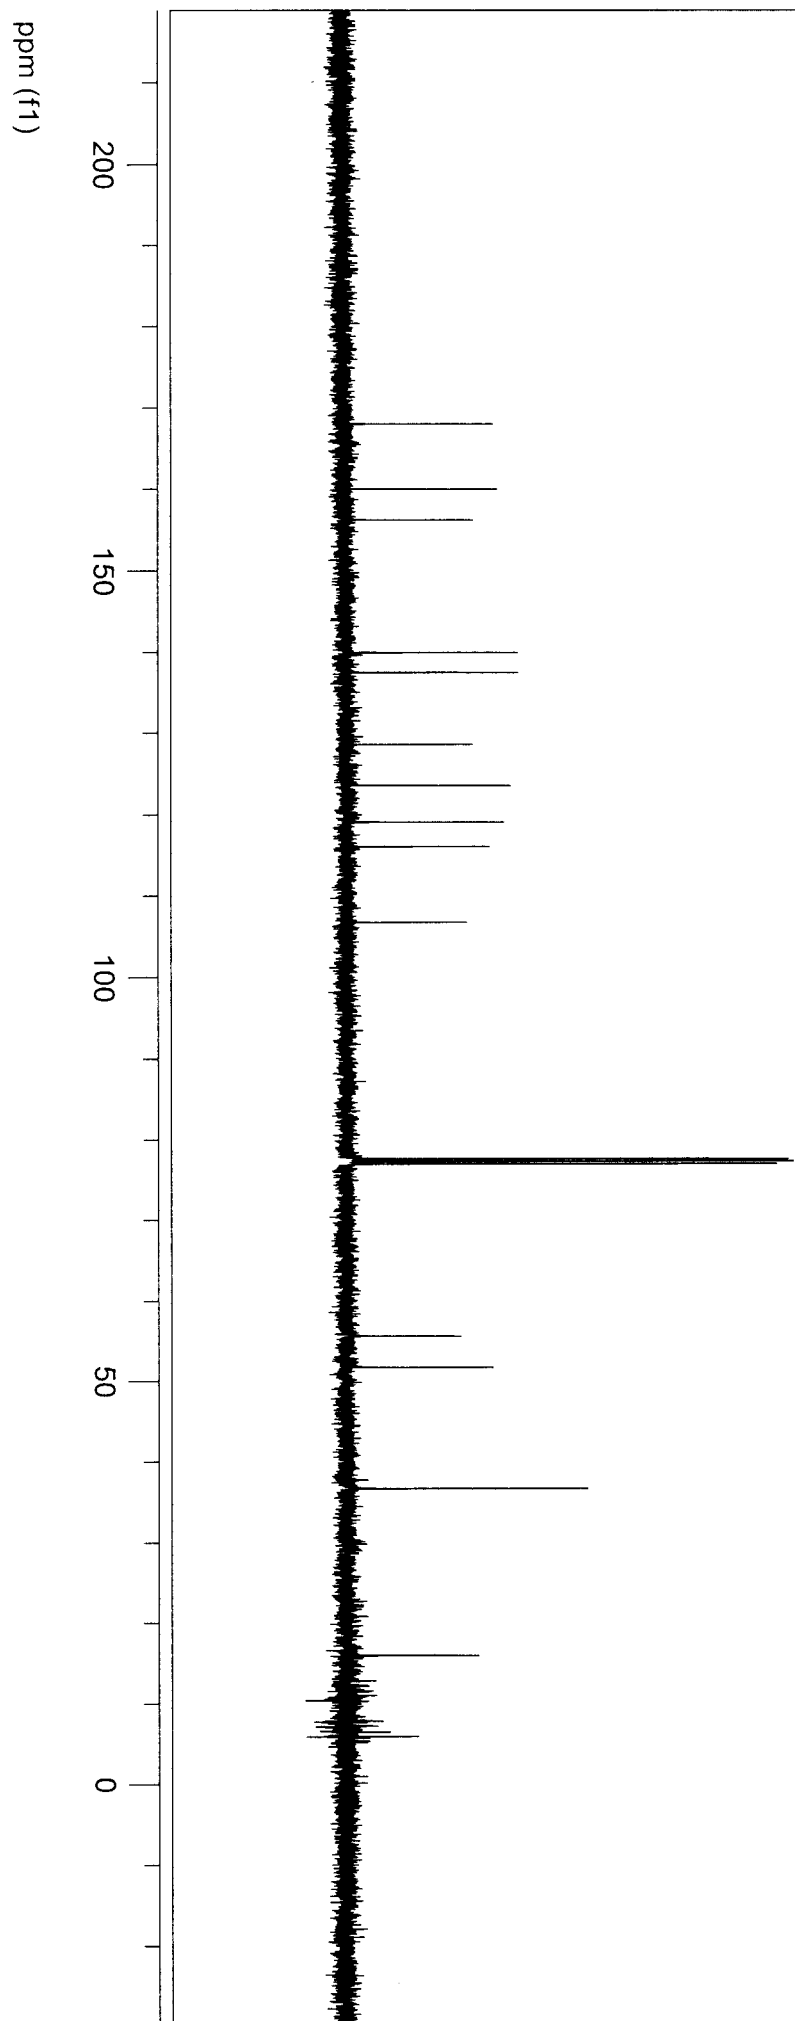

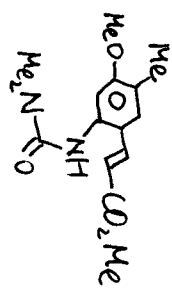

5f

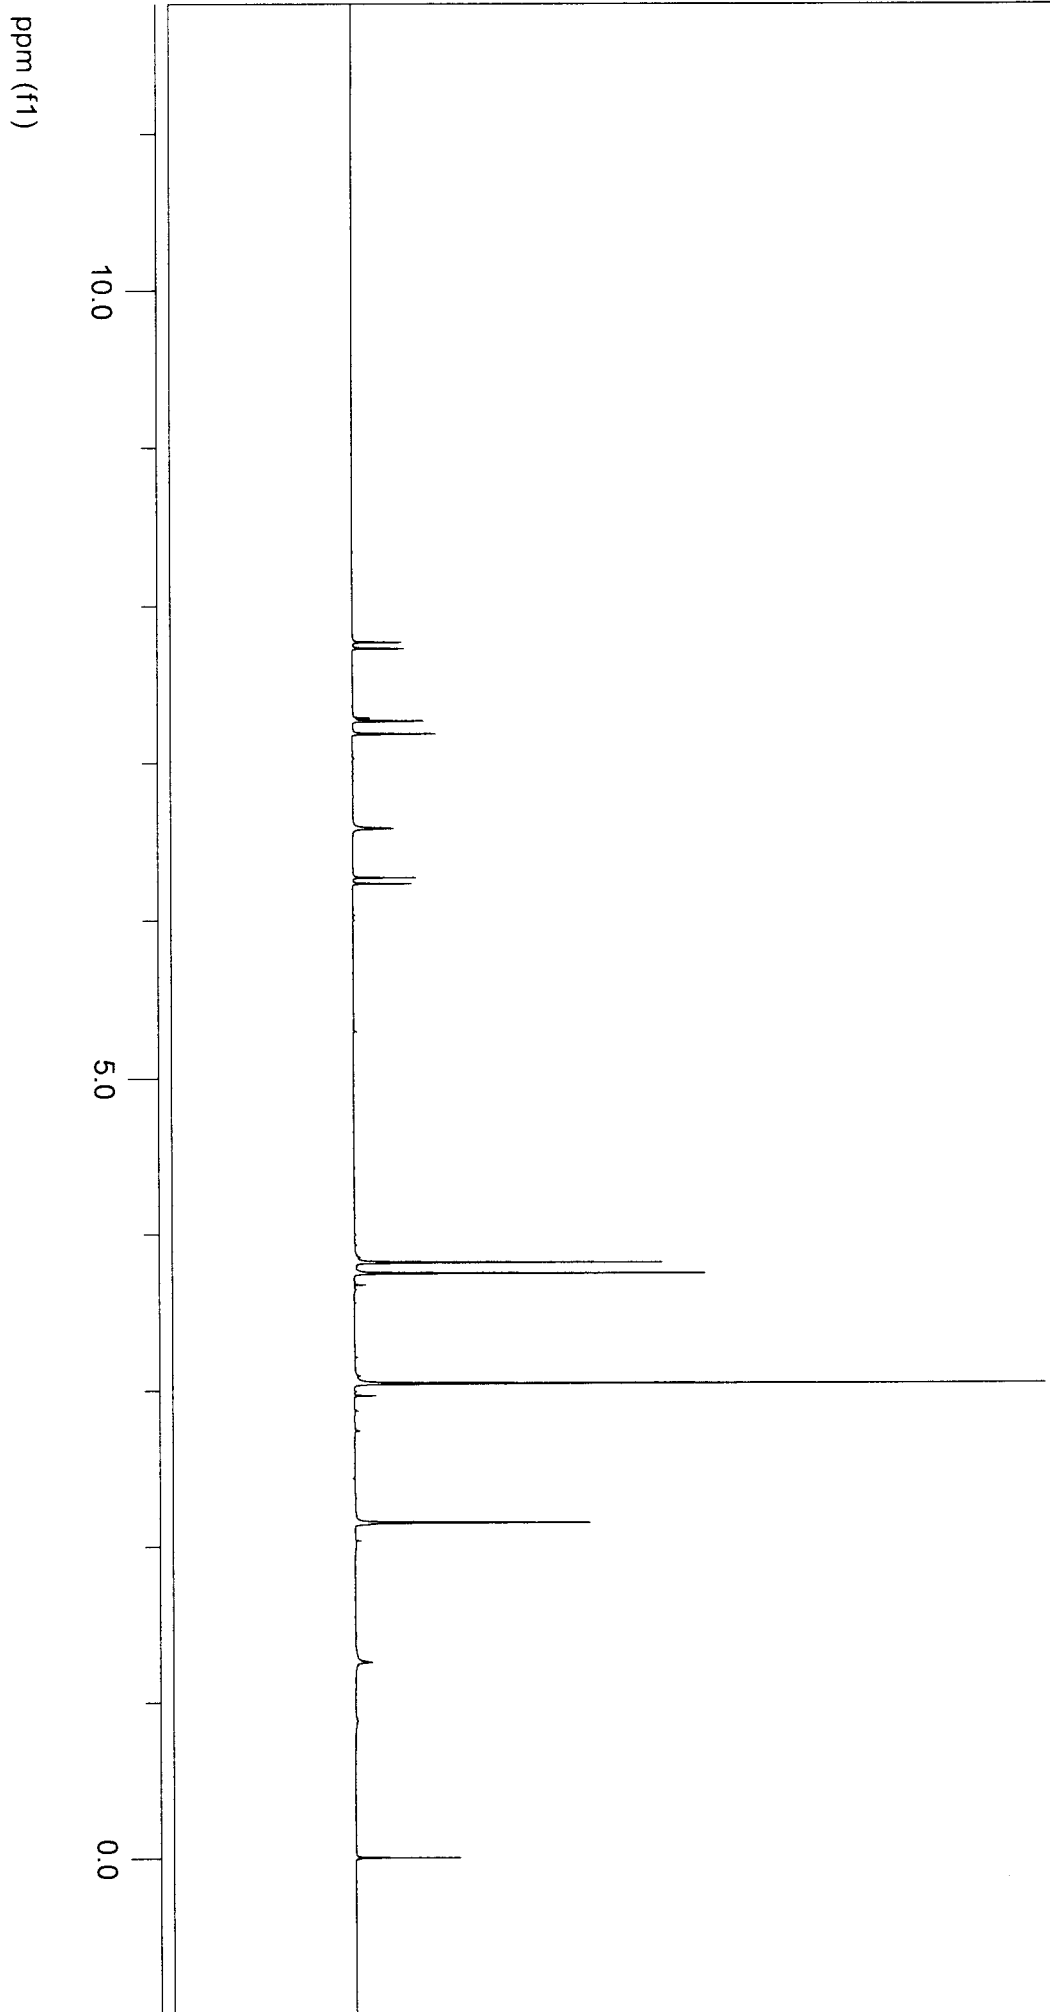



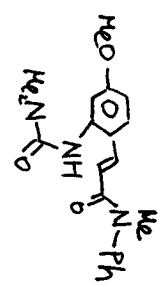

5g

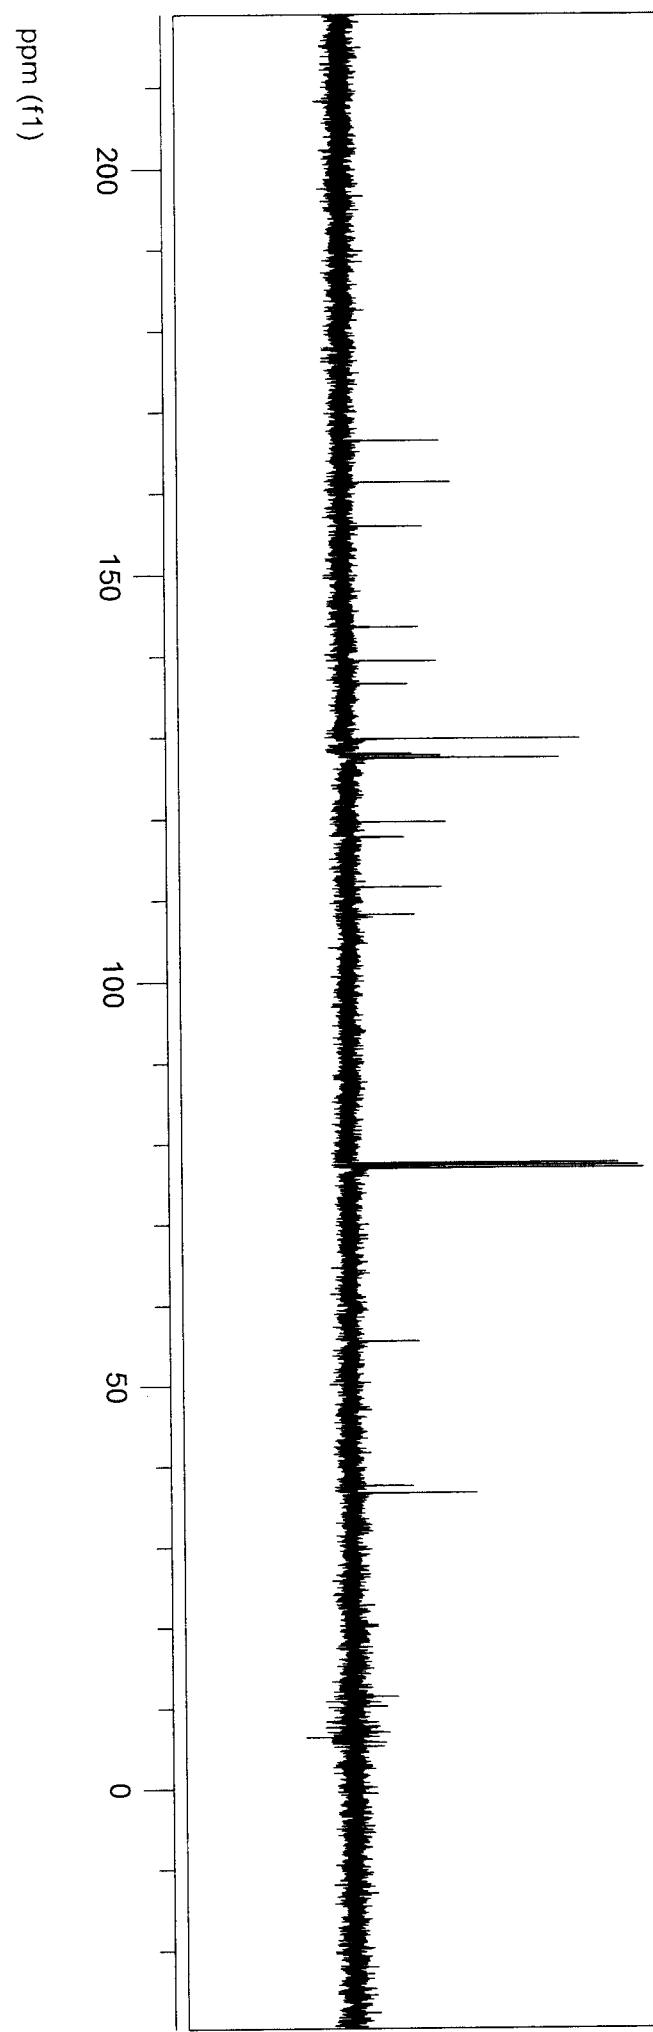

ppm (f1)

10.0

5.0

0.0

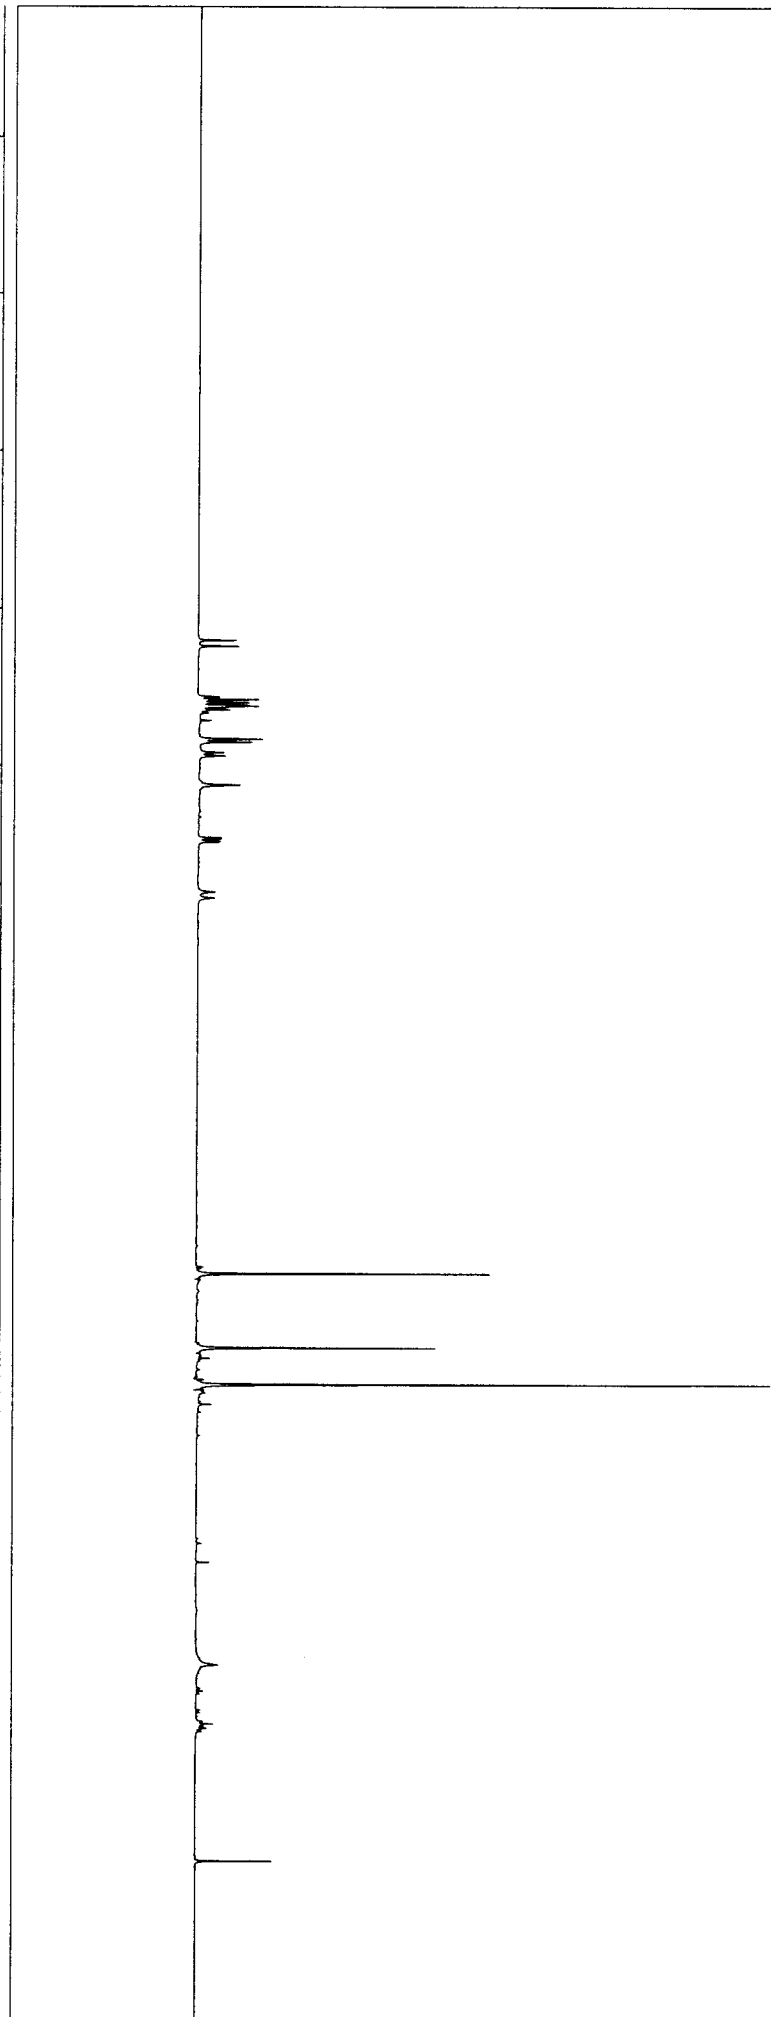

5g

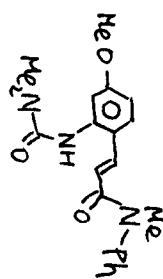

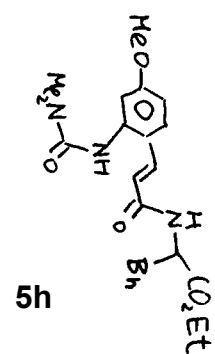

ppm (f1)

200  
150  
100  
50  
0

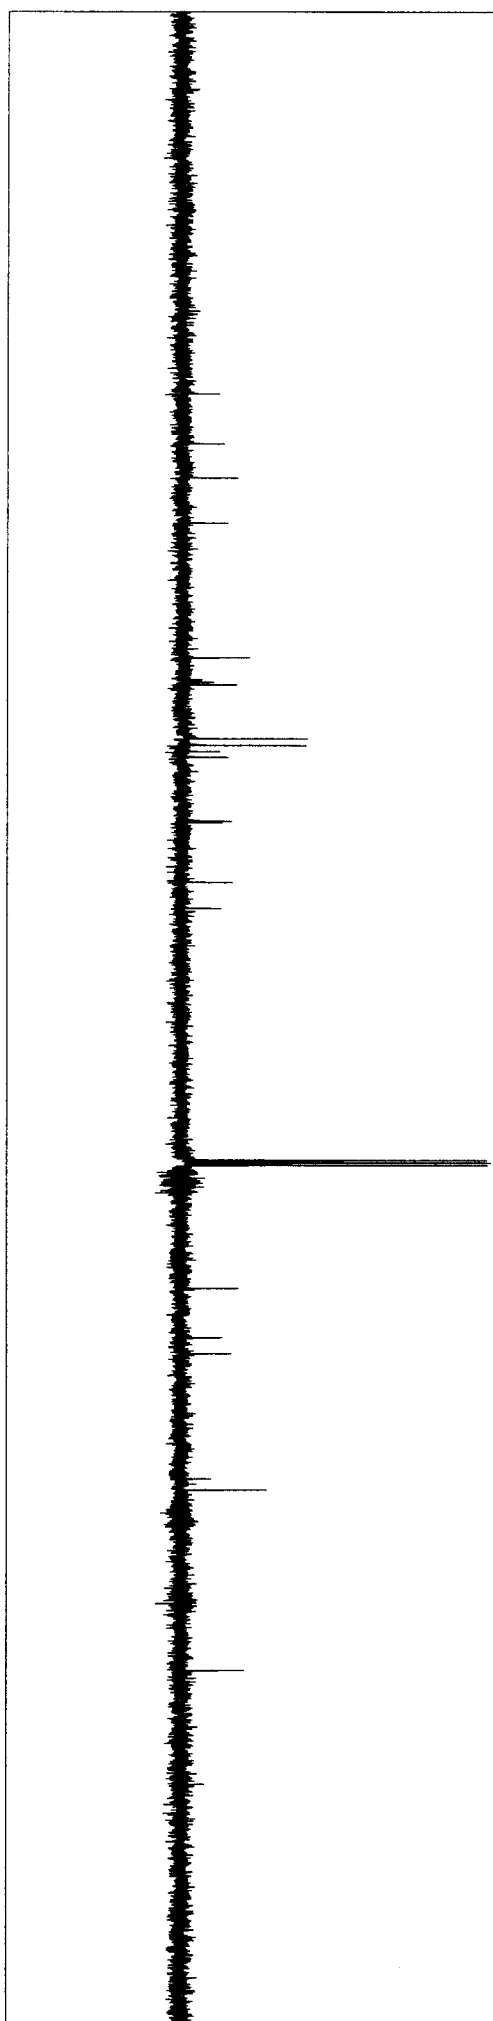

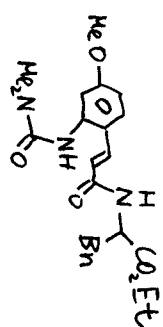

5h

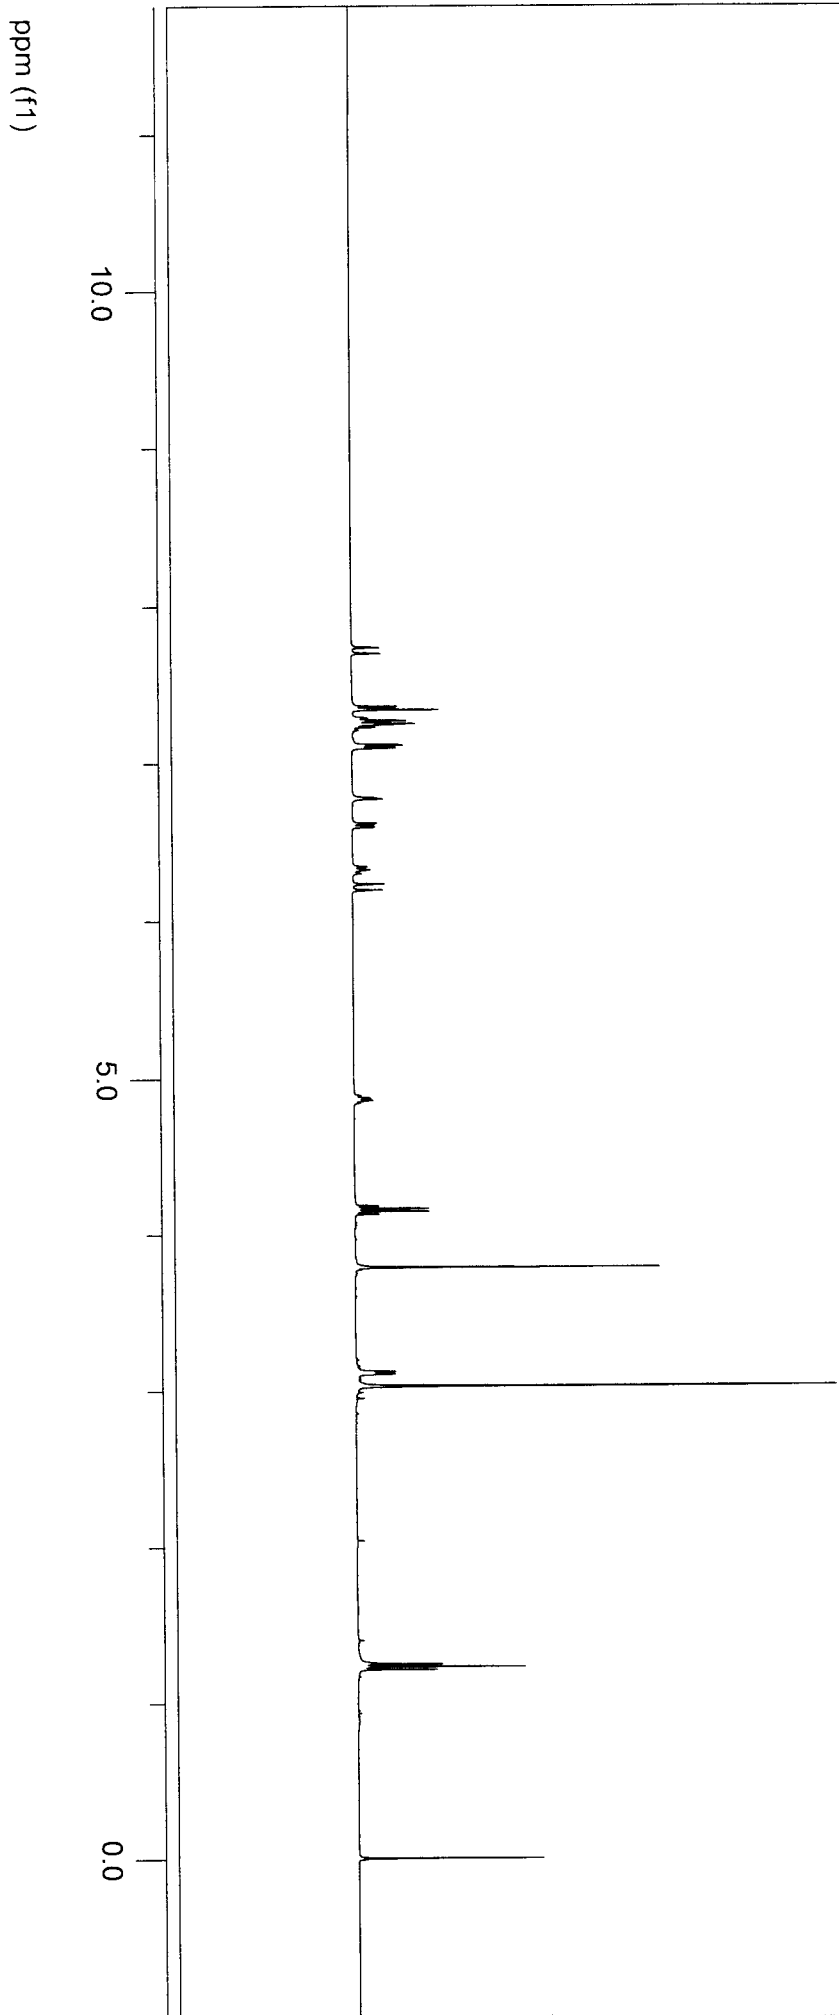



5h

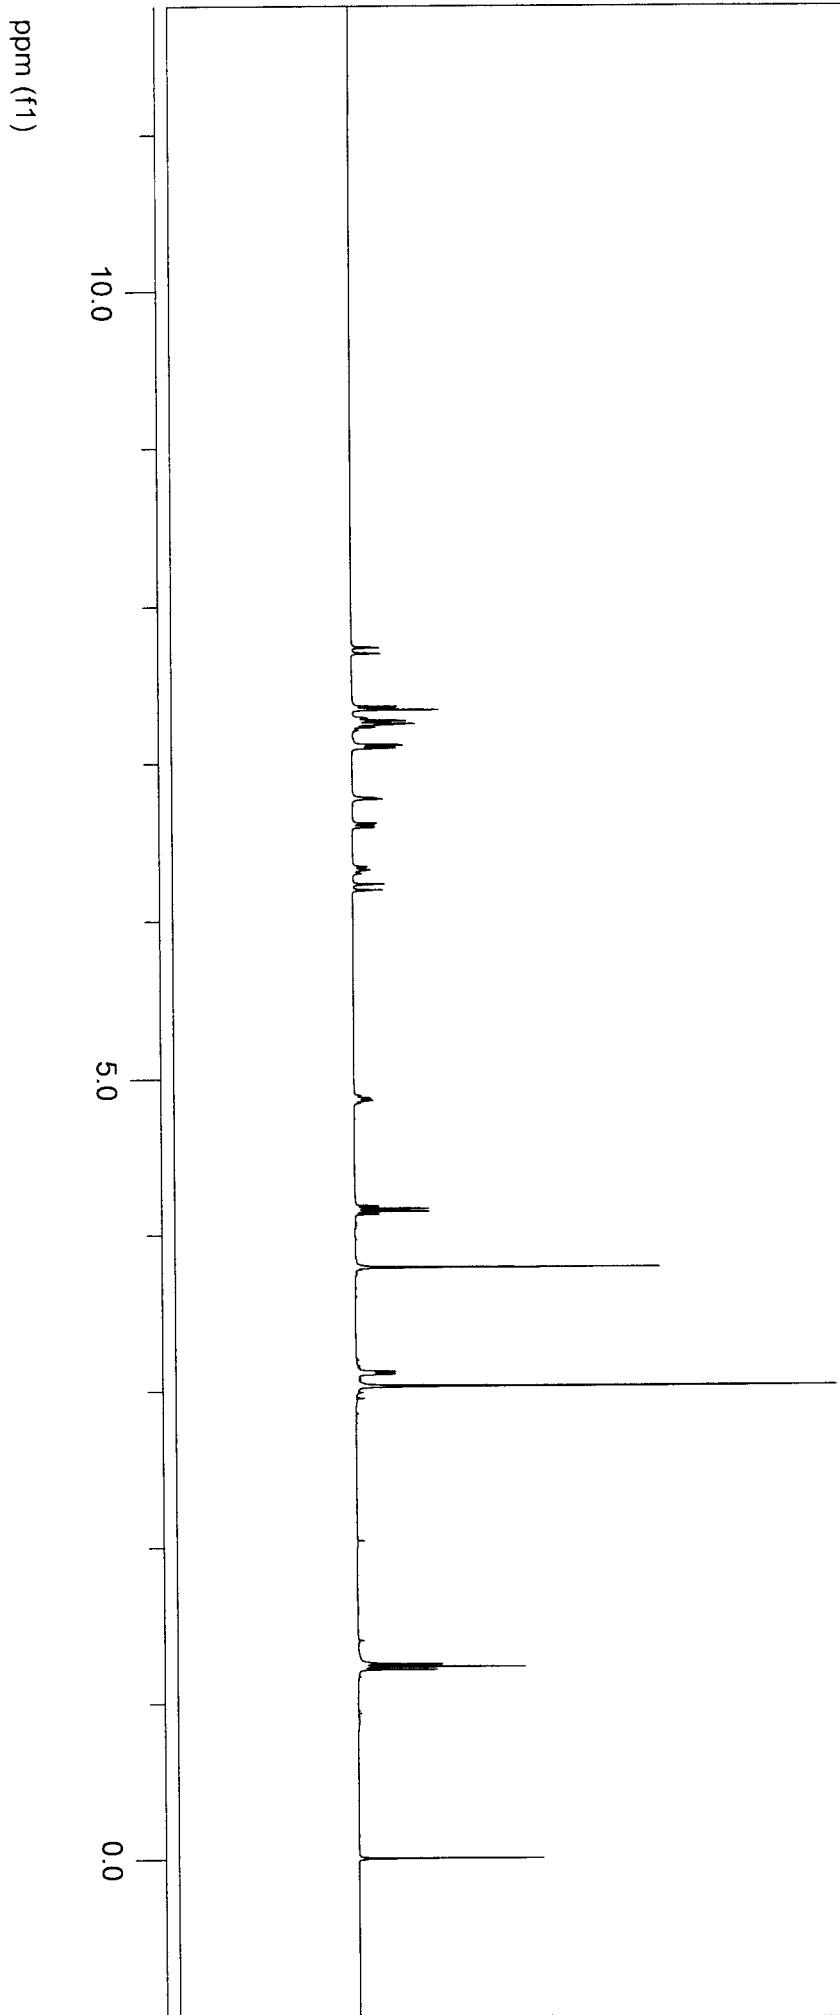

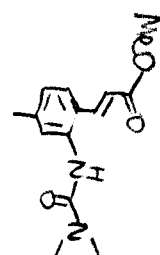

5i

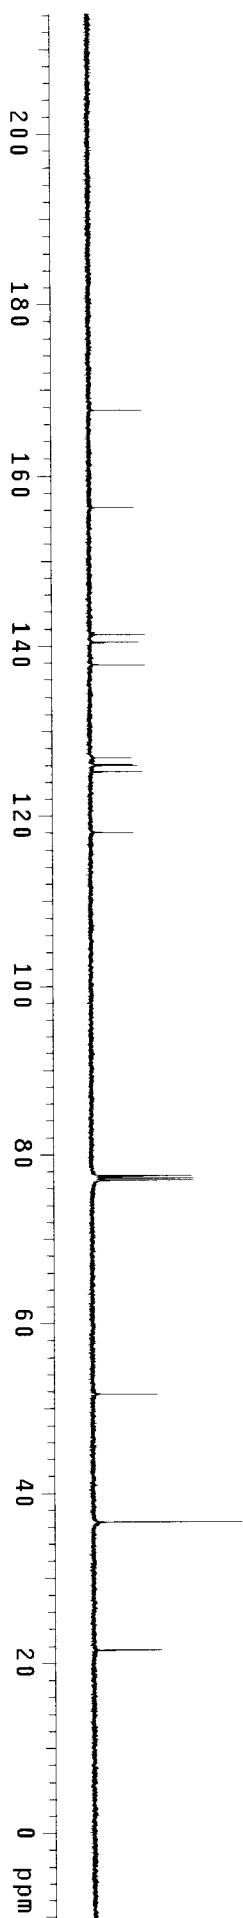

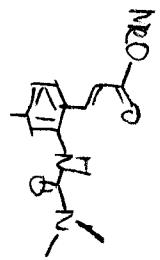

5i

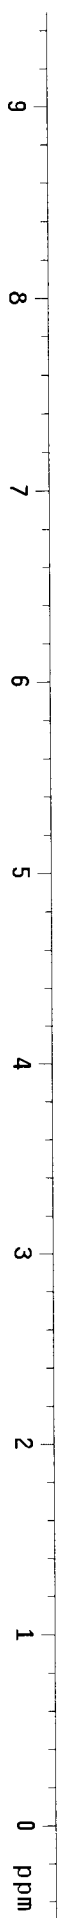

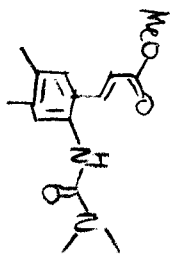

5j

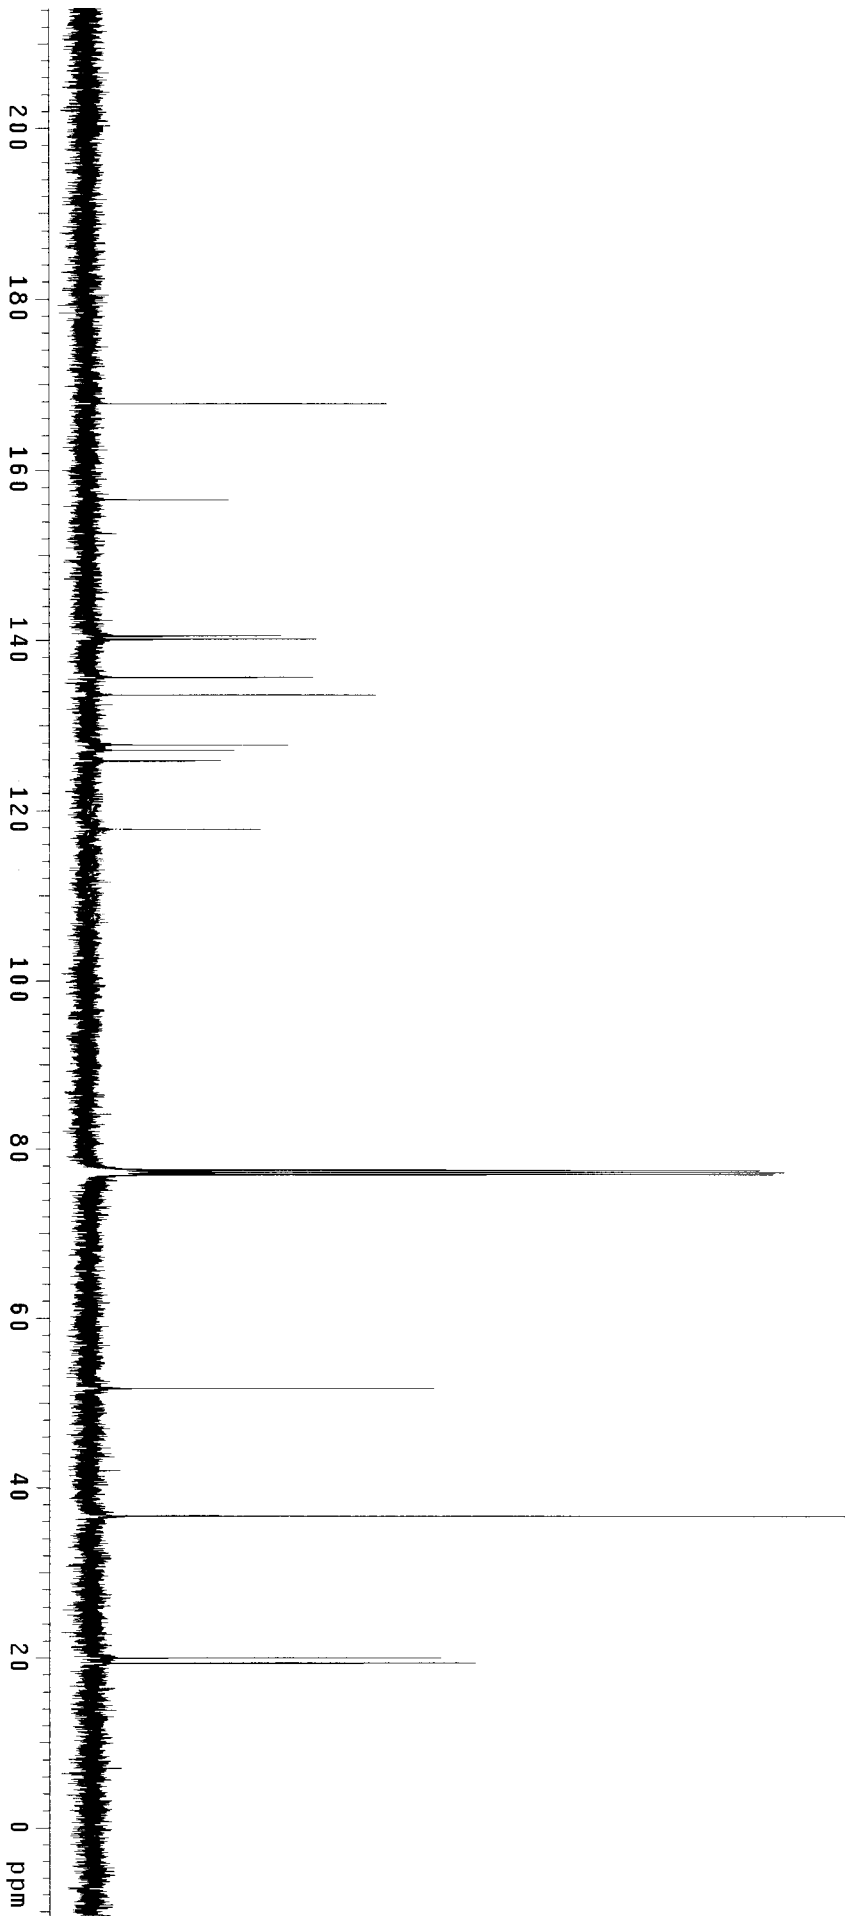



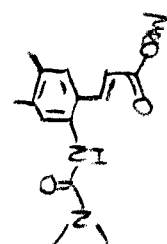

5j

9  
8  
7  
6  
5  
4  
3  
2  
1  
0 ppm

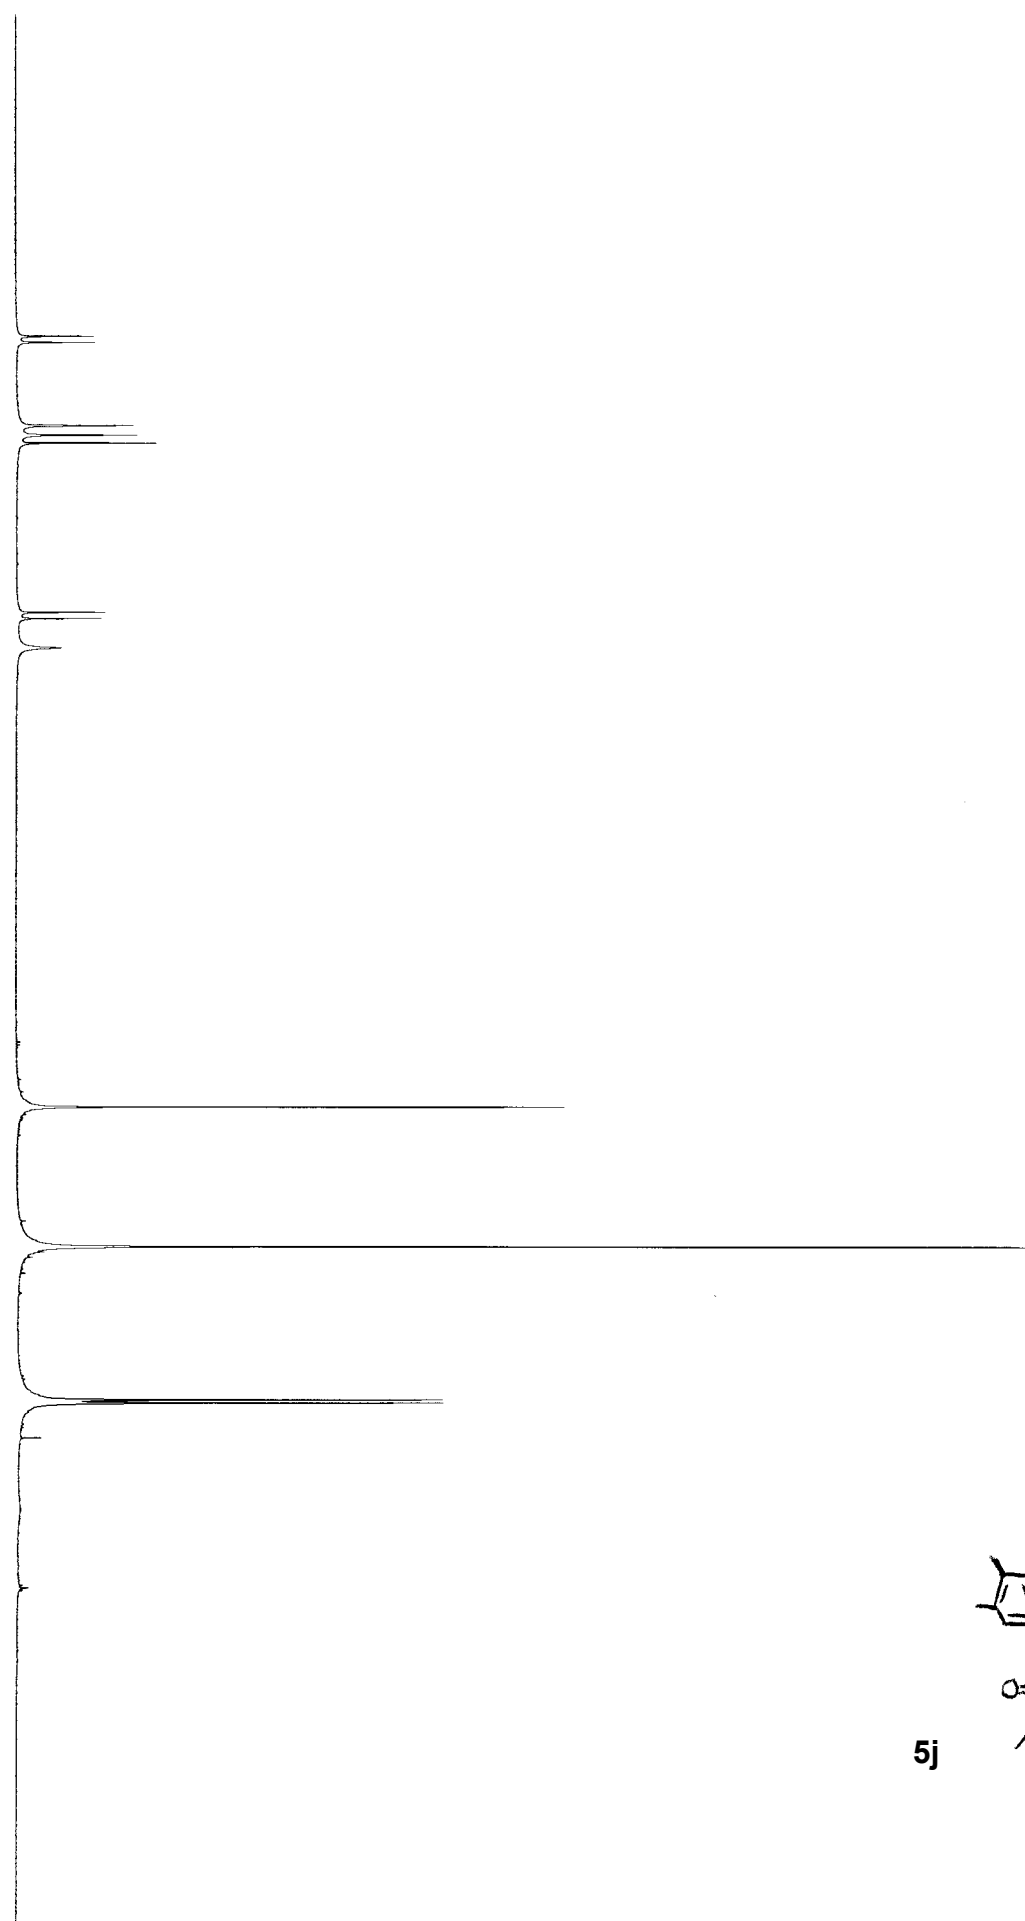

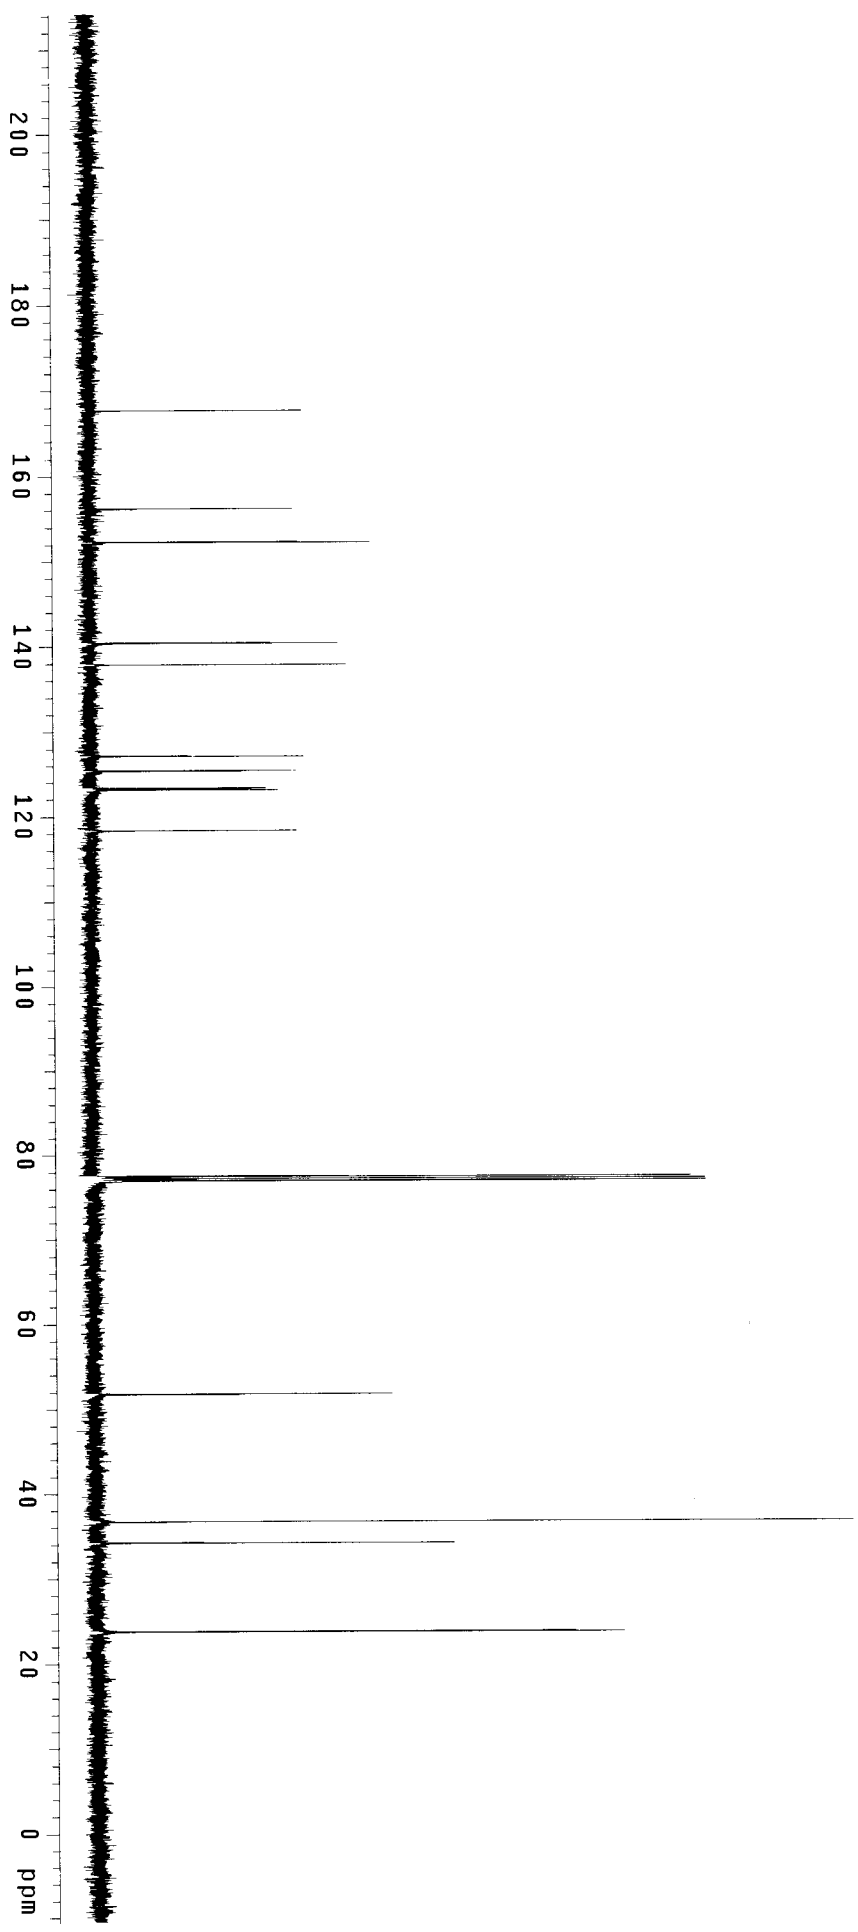

5k

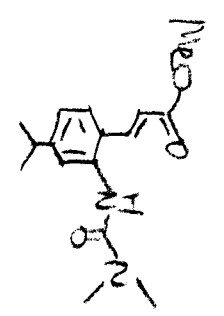

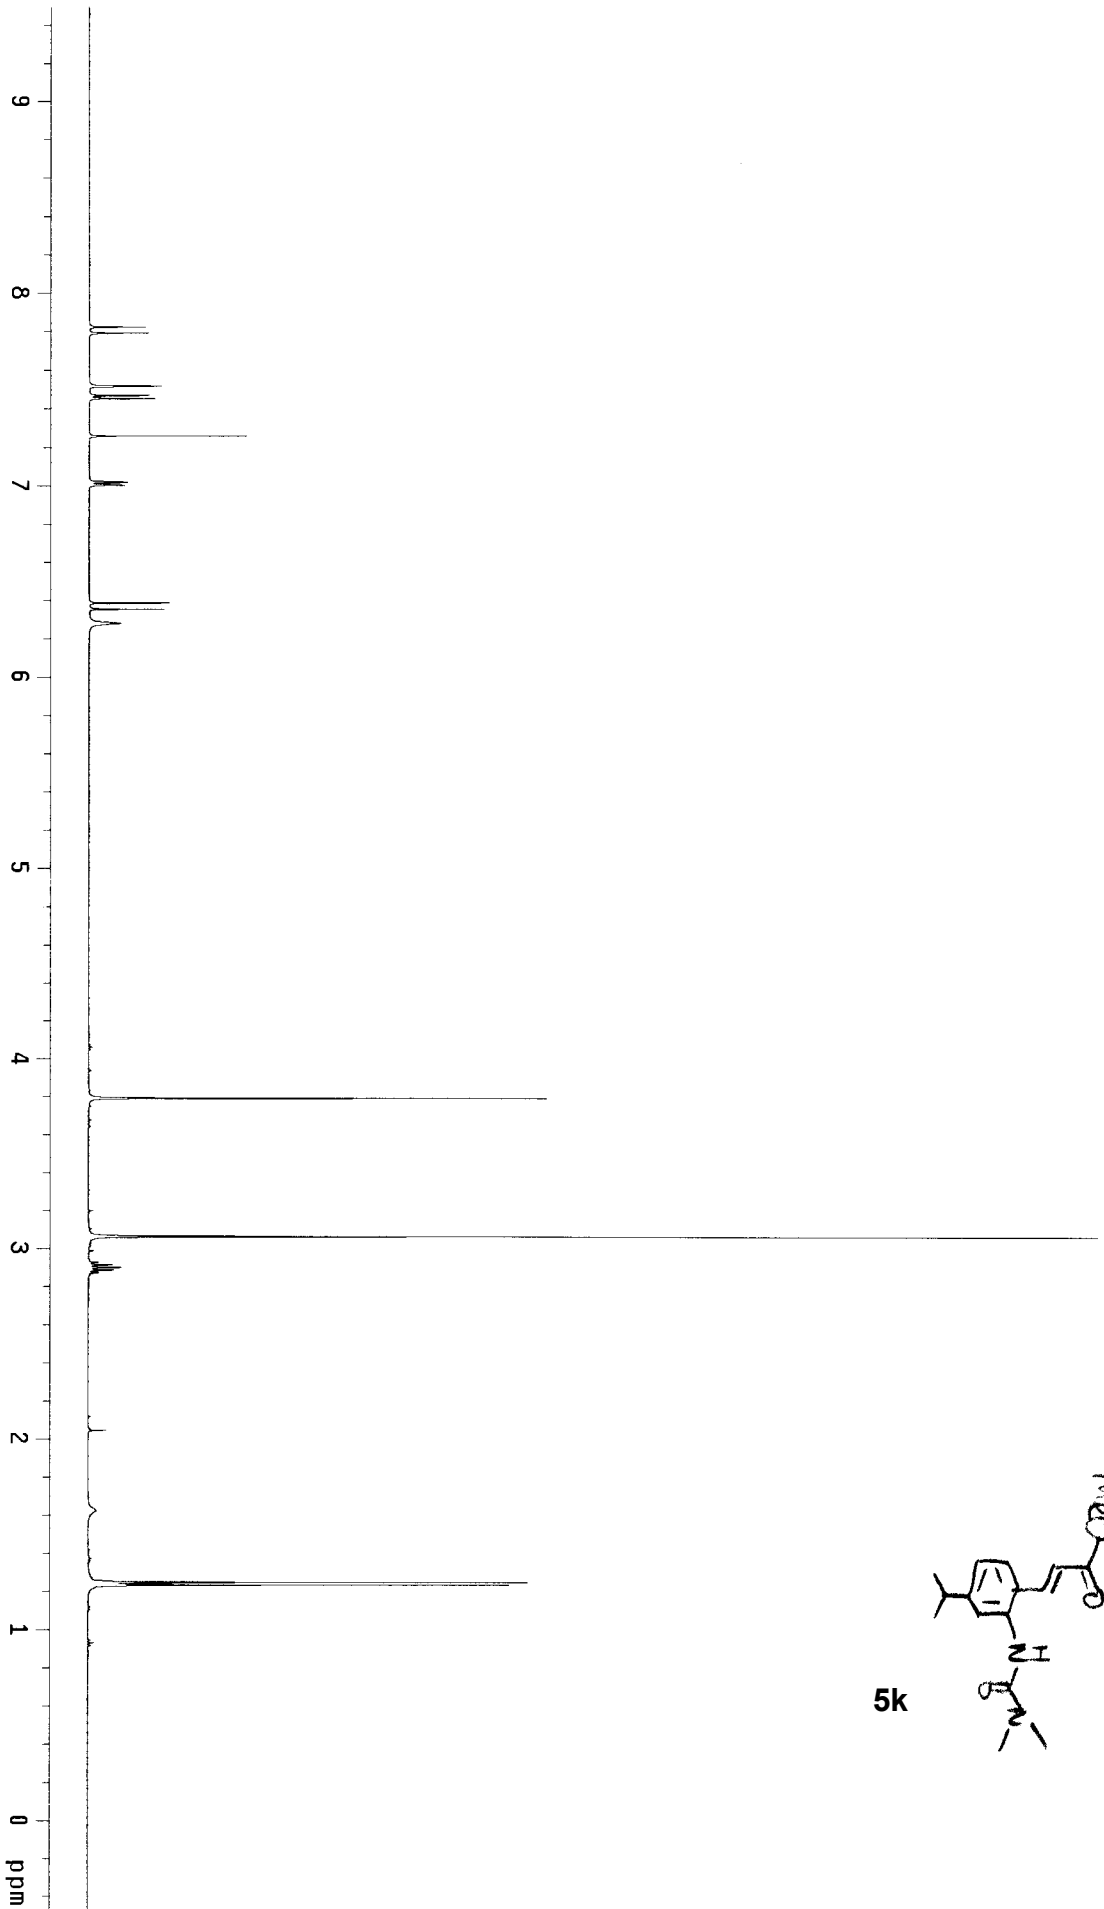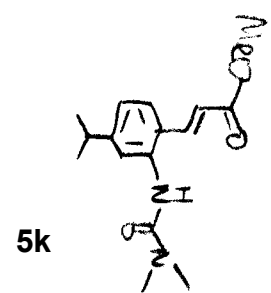

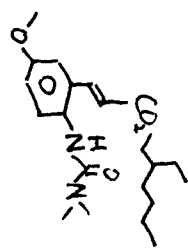

51

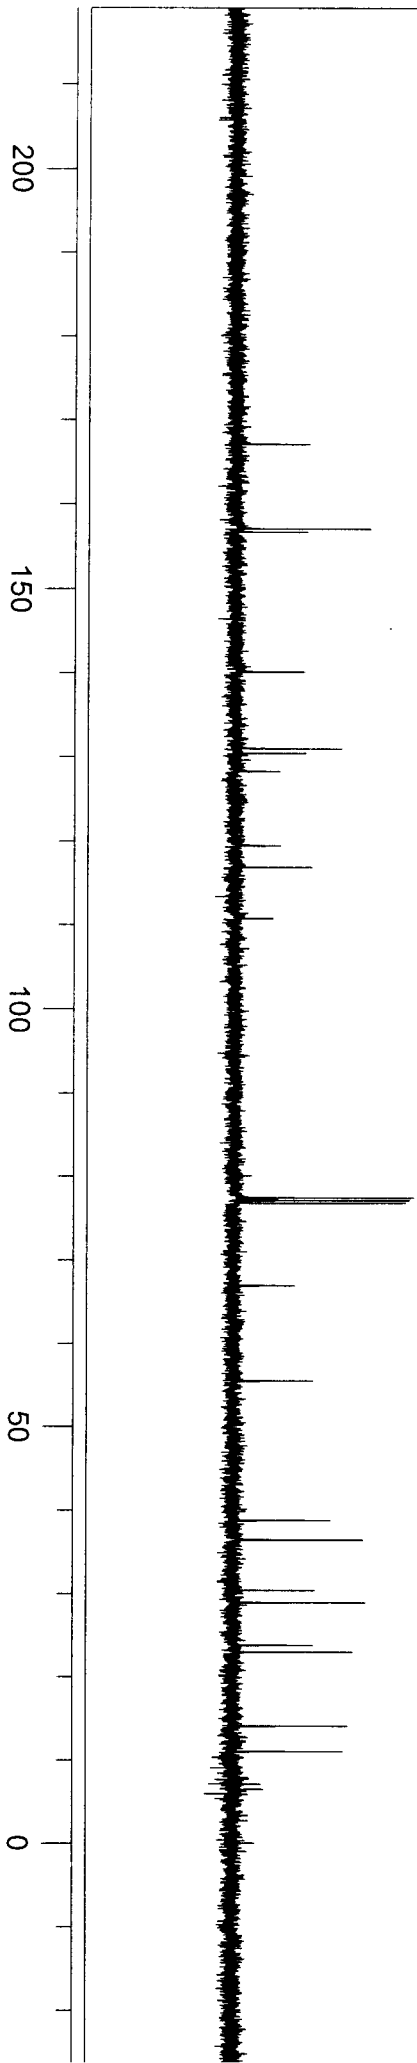

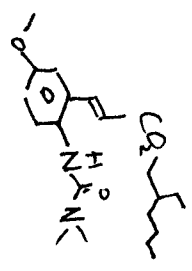

5I

ppm (f1)

10.0

5.0

0.0

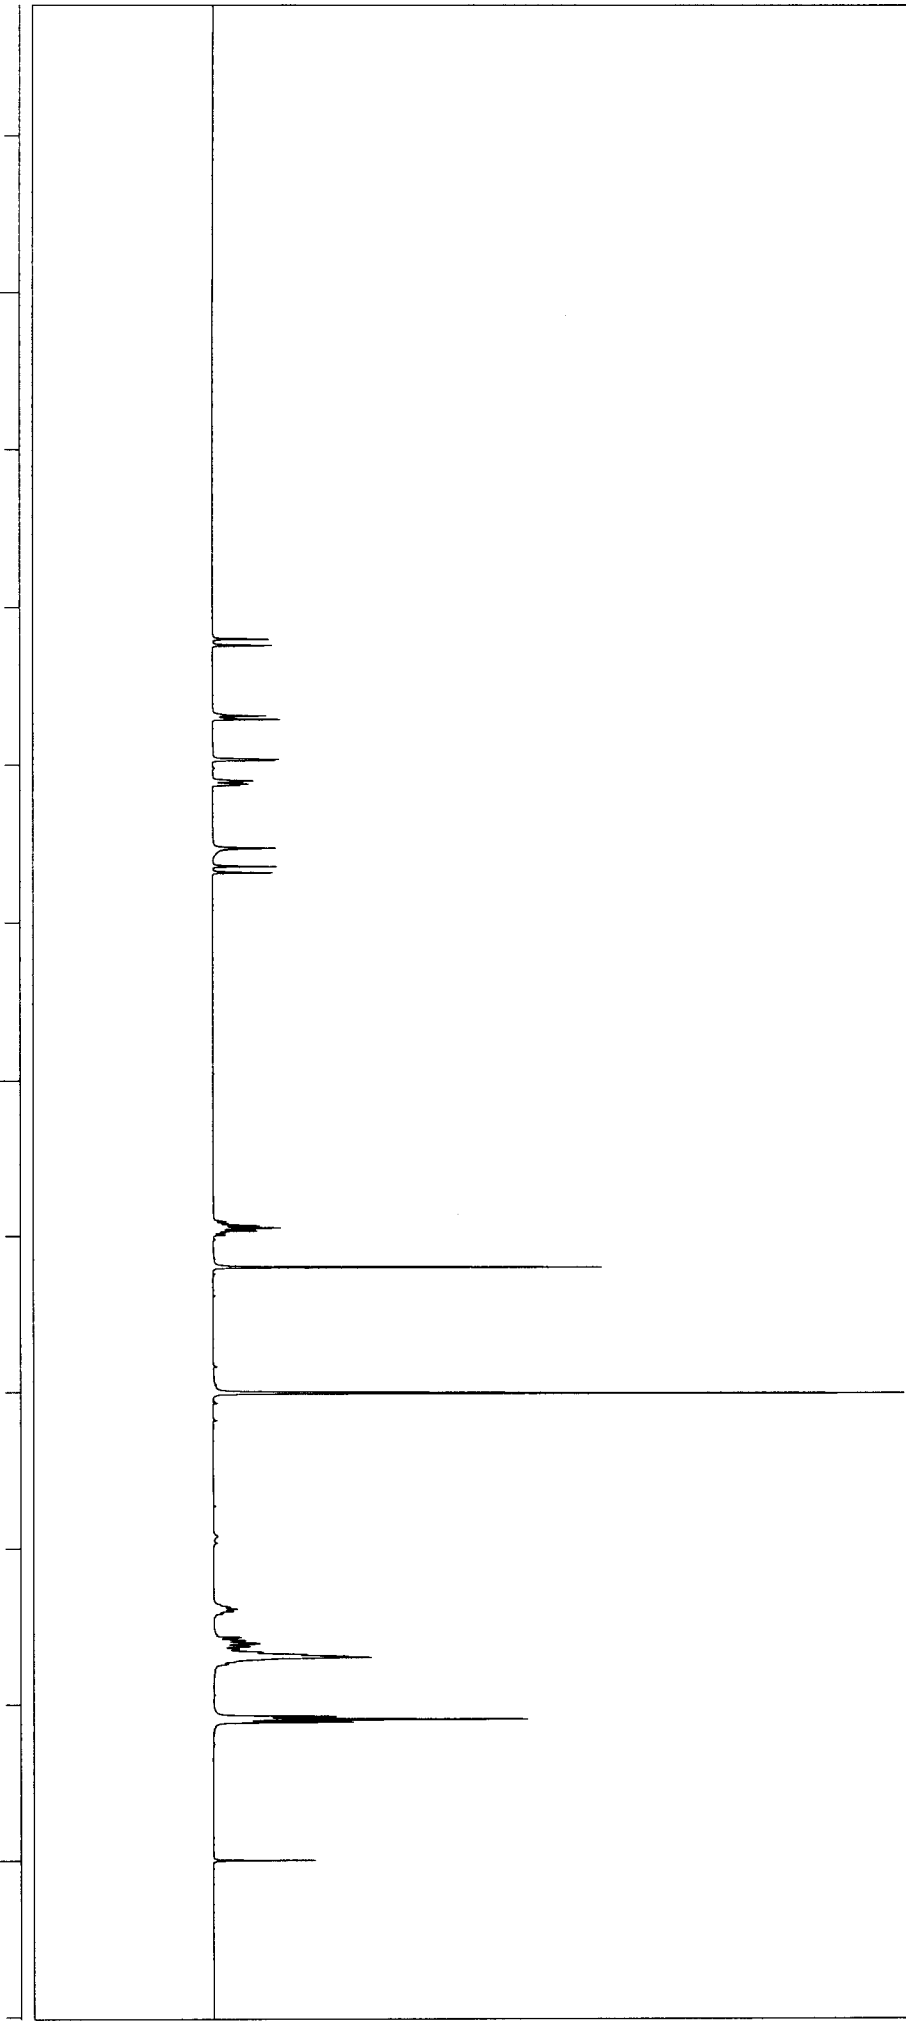

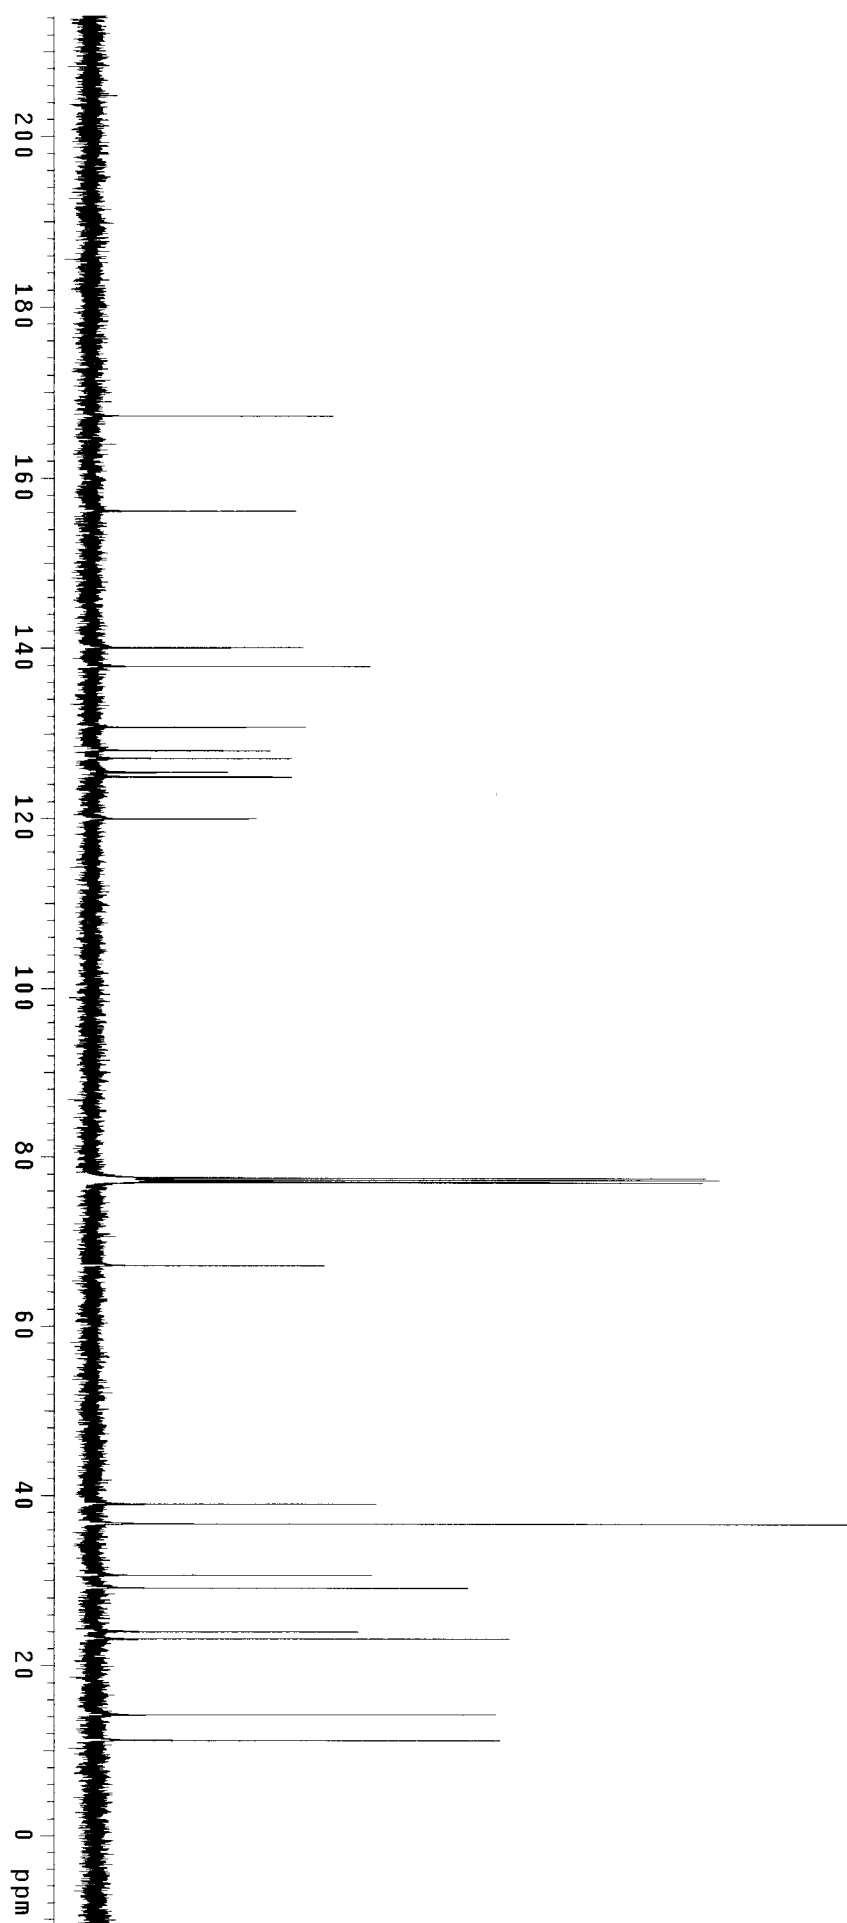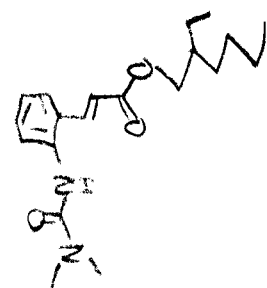

5m

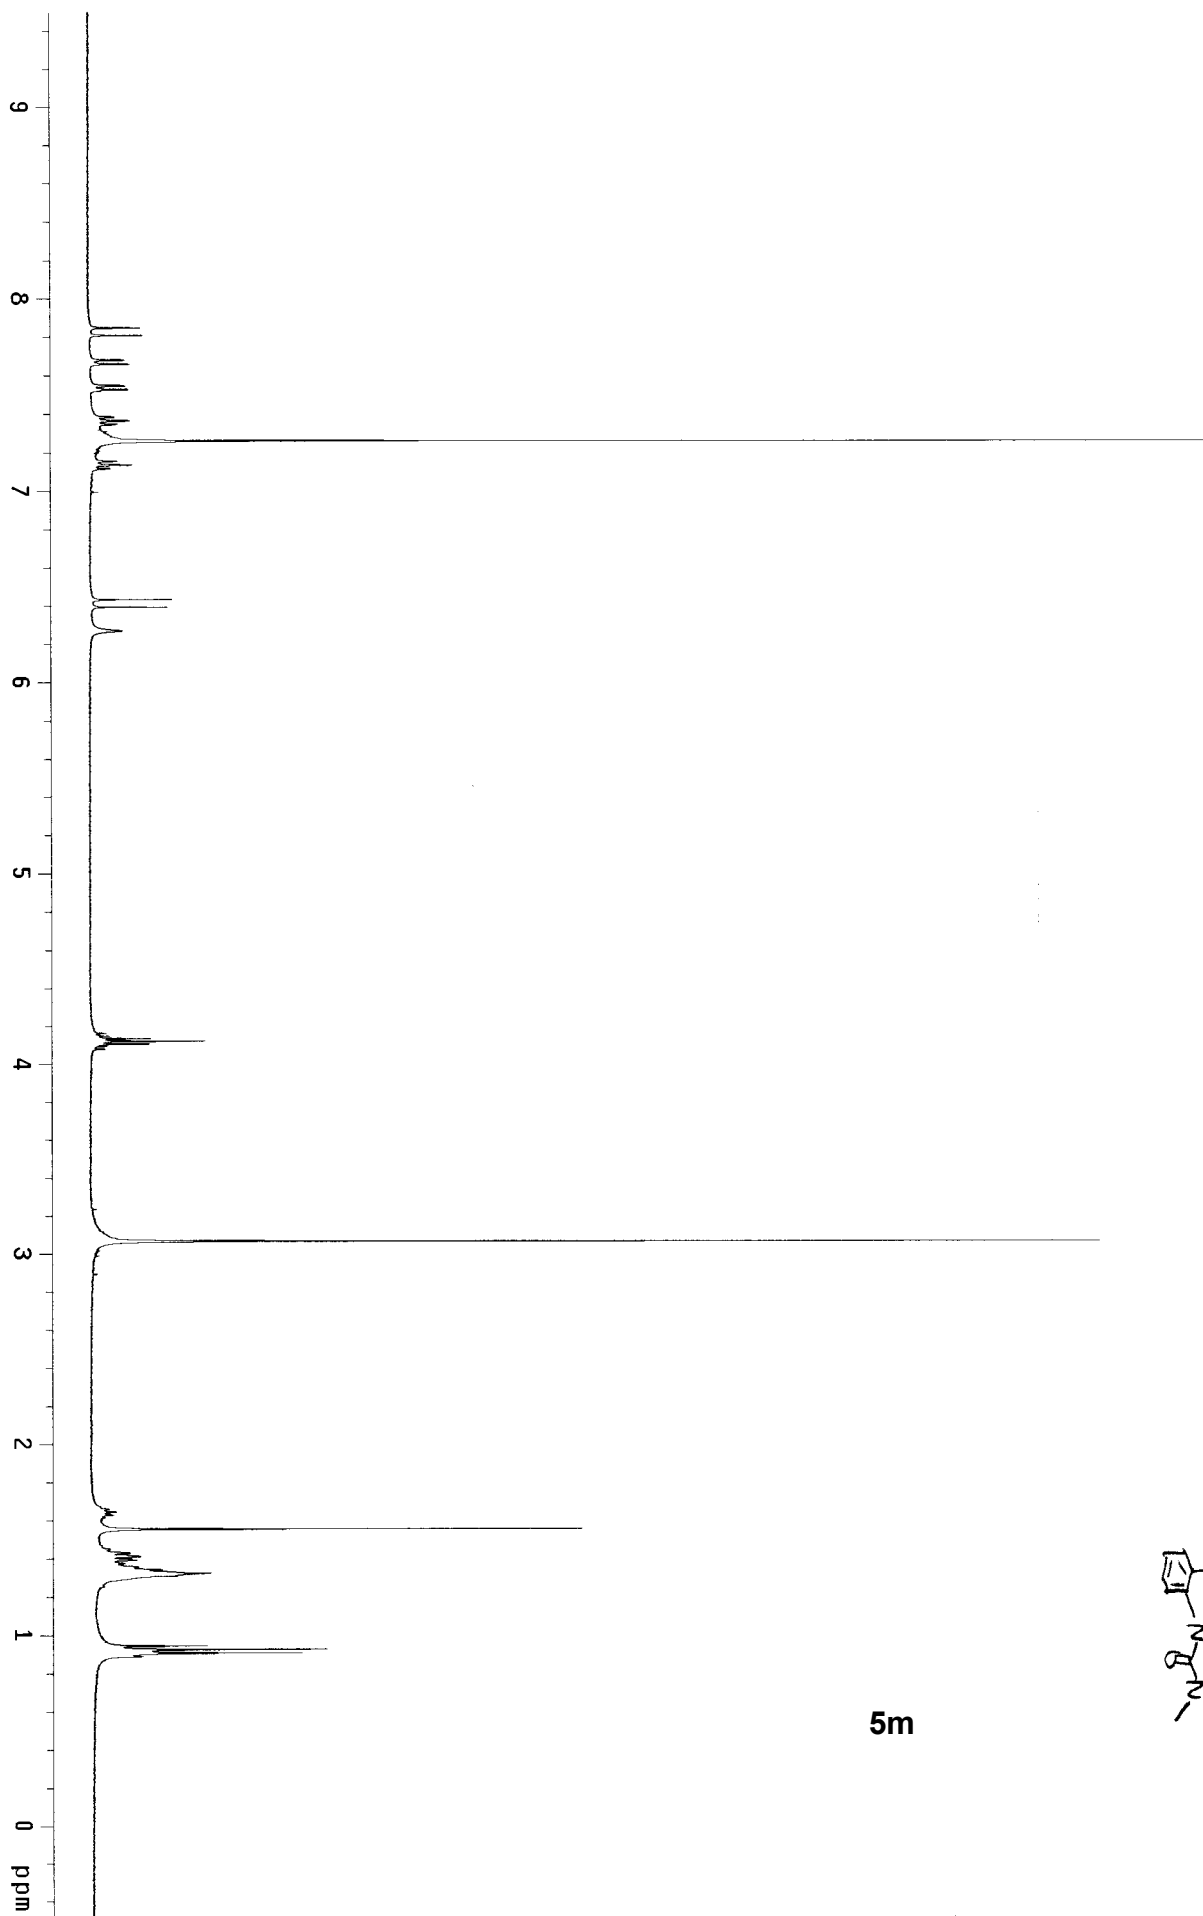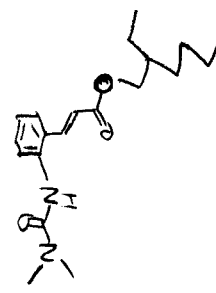

5m

ppm (f1)

200  
150  
100  
50  
0

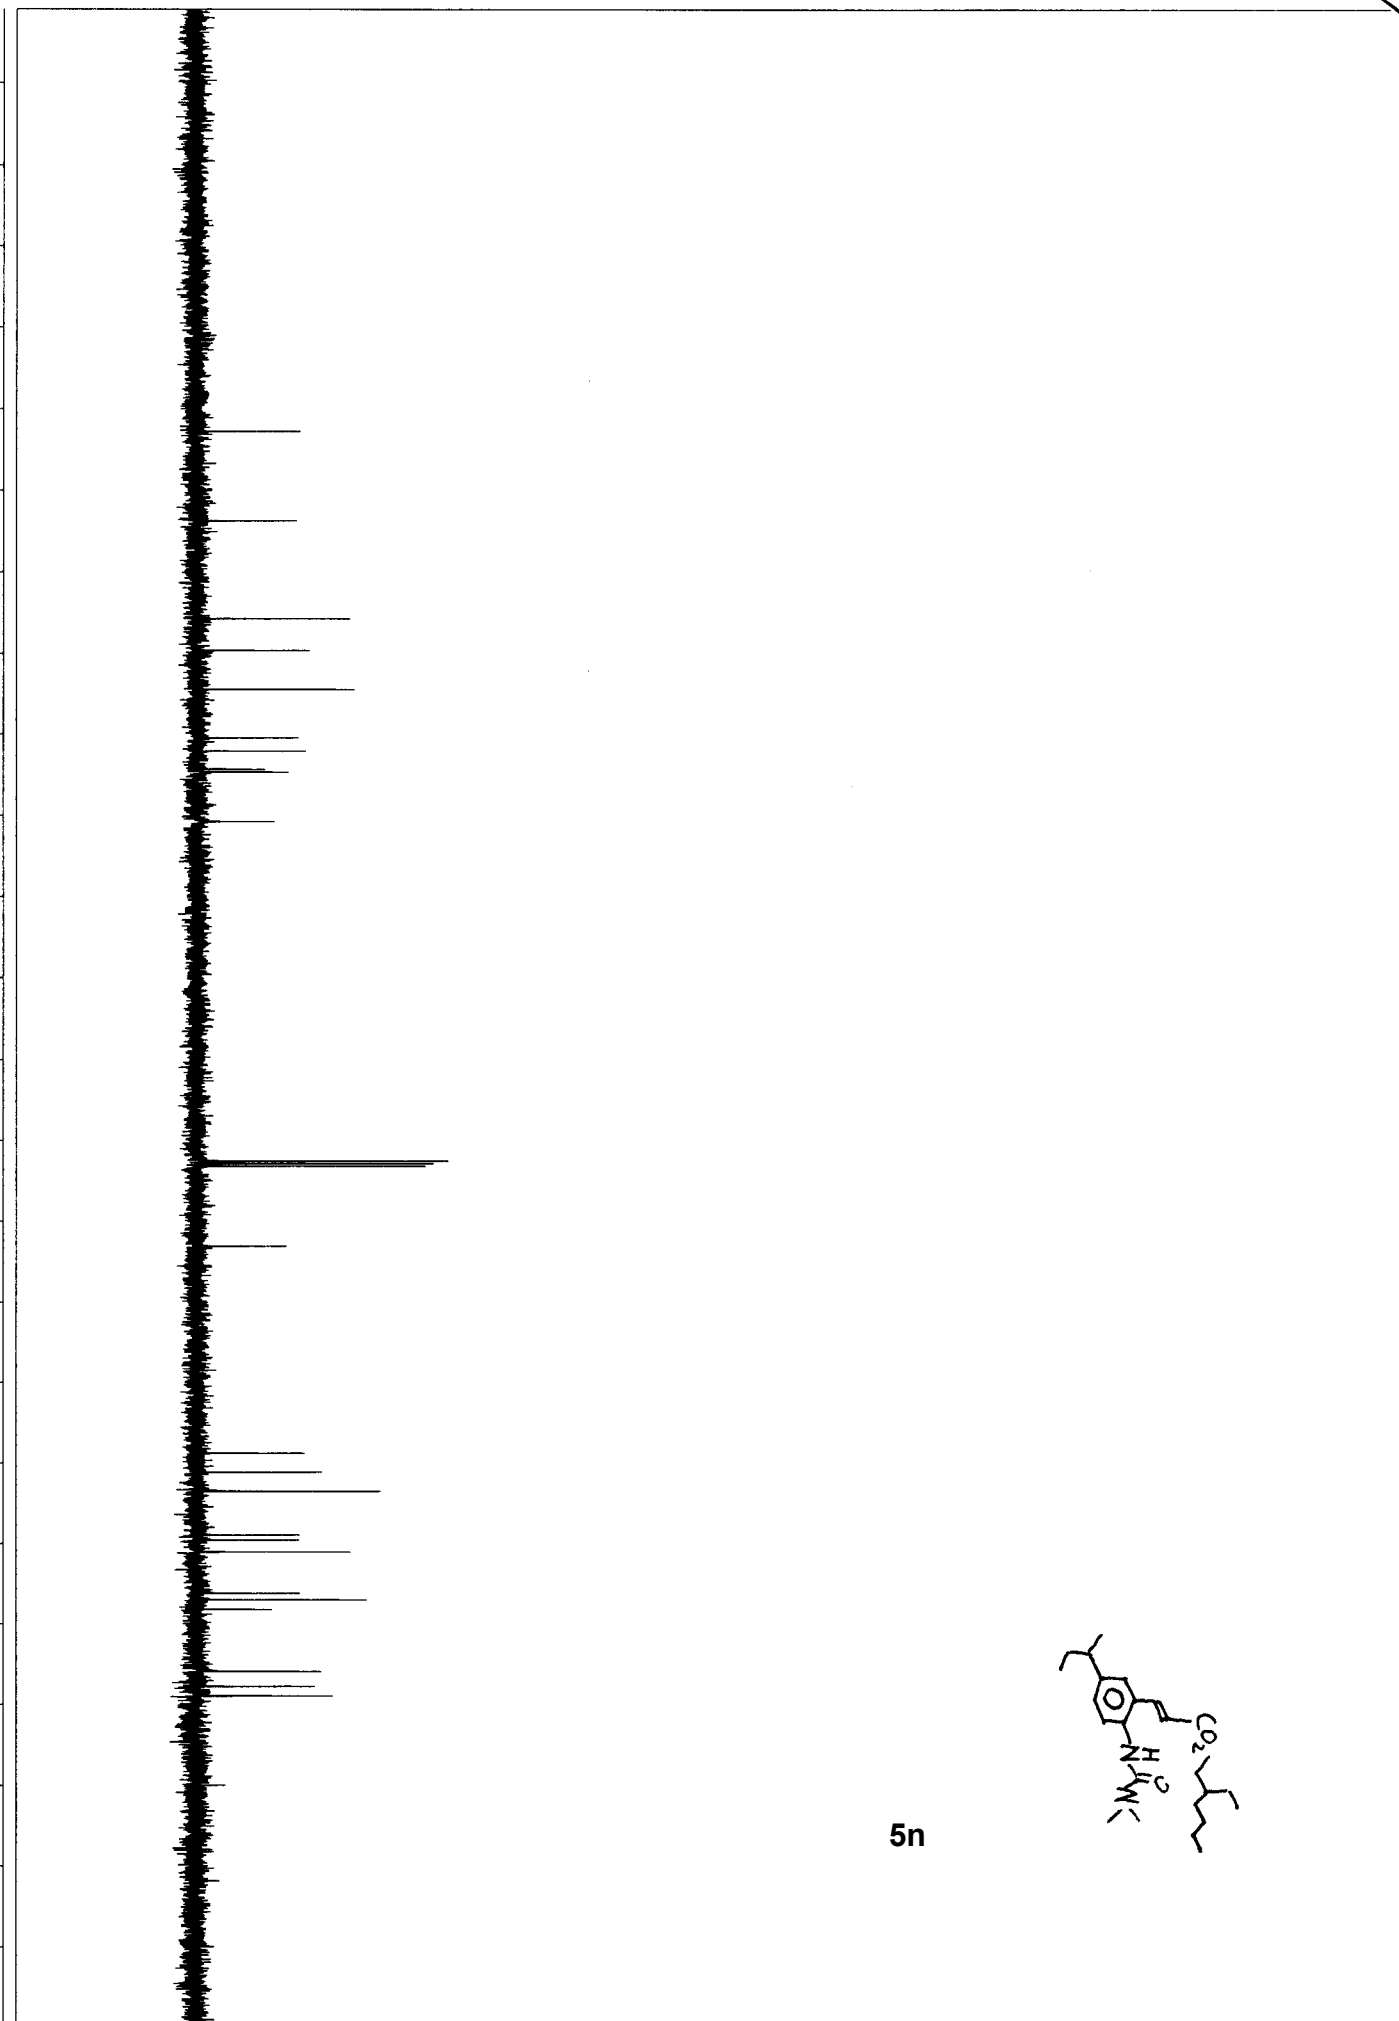

5n

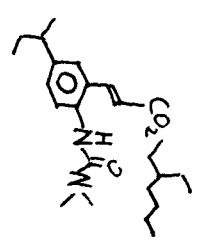



ppm (f1)

10.0

5.0

0.0

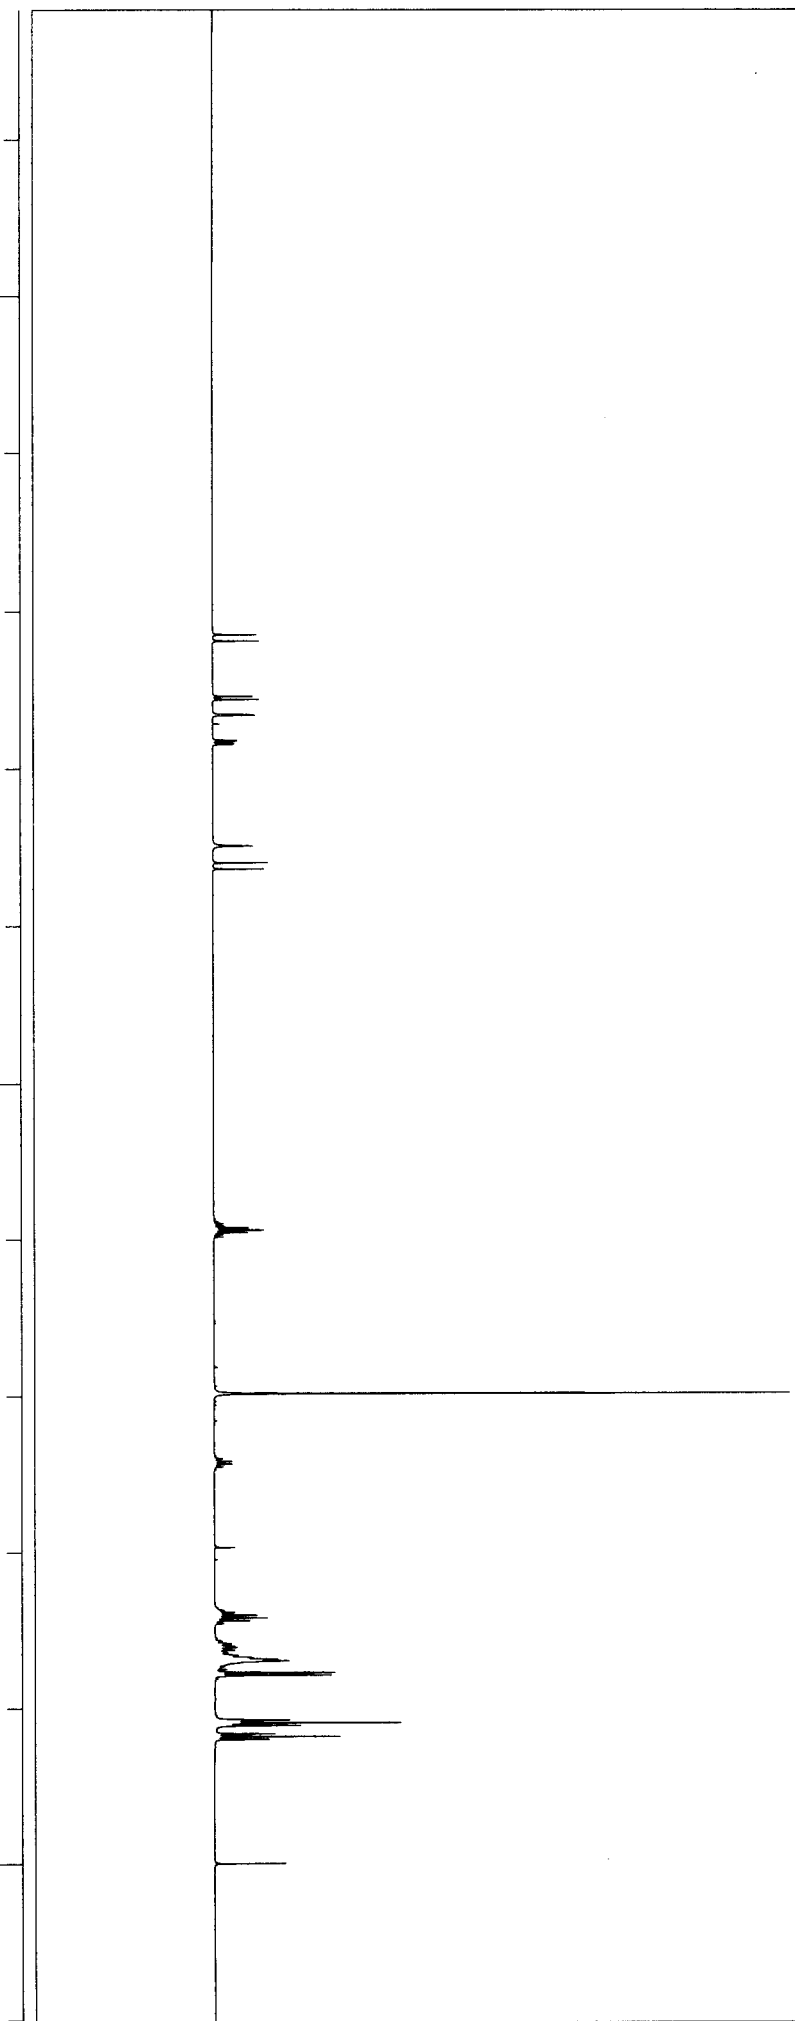

5n

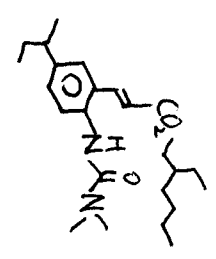

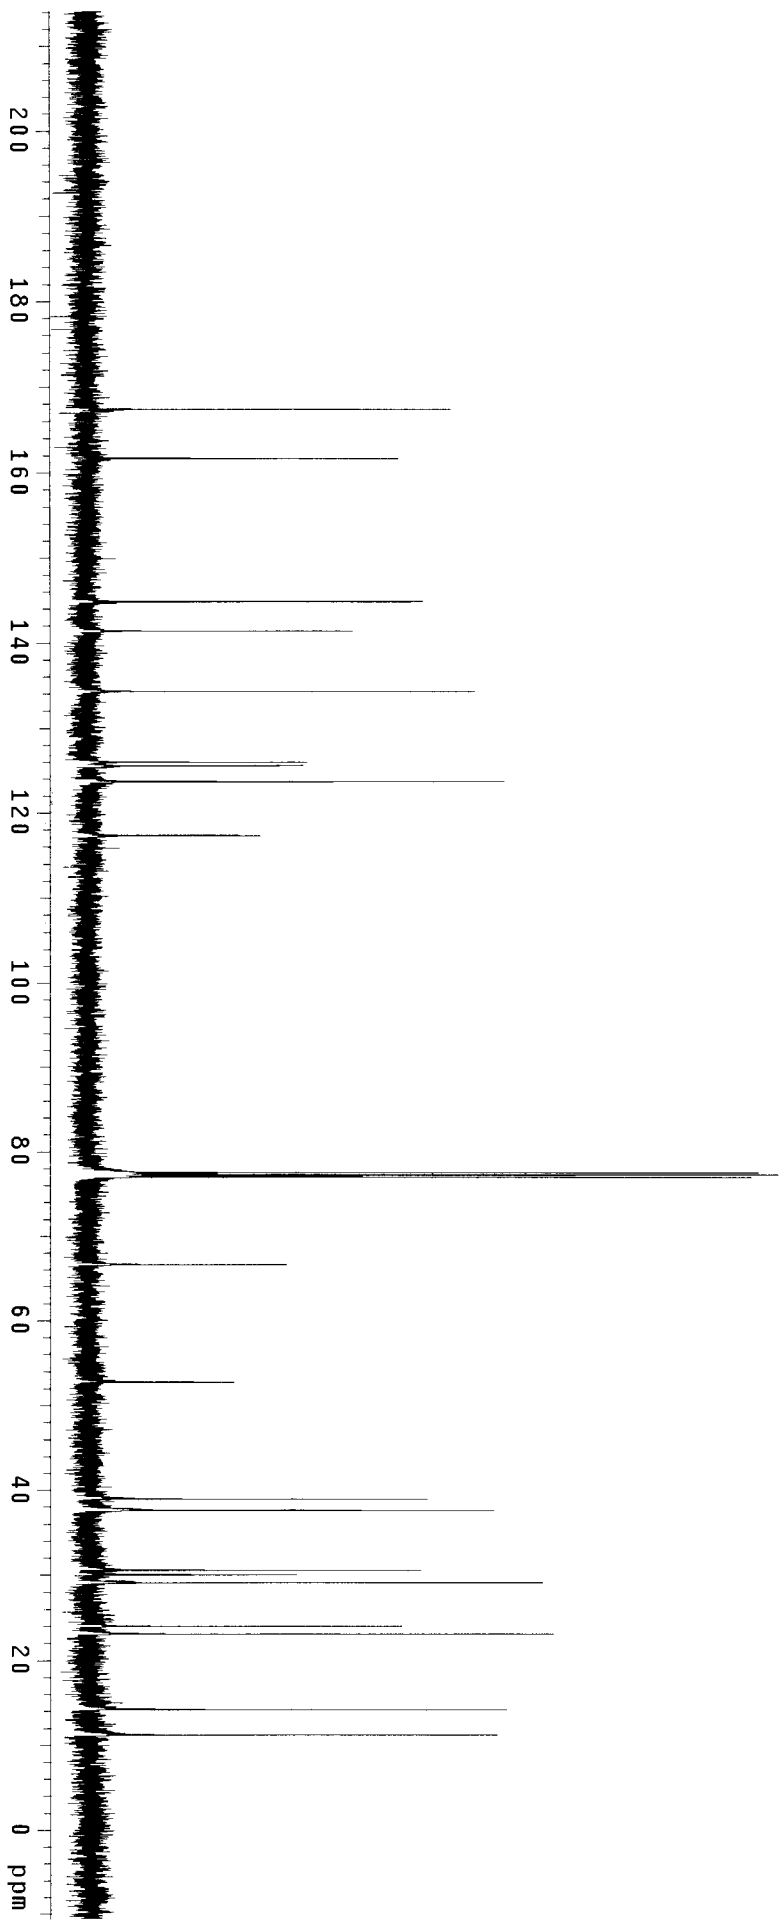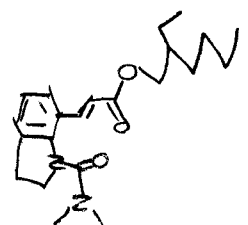

50

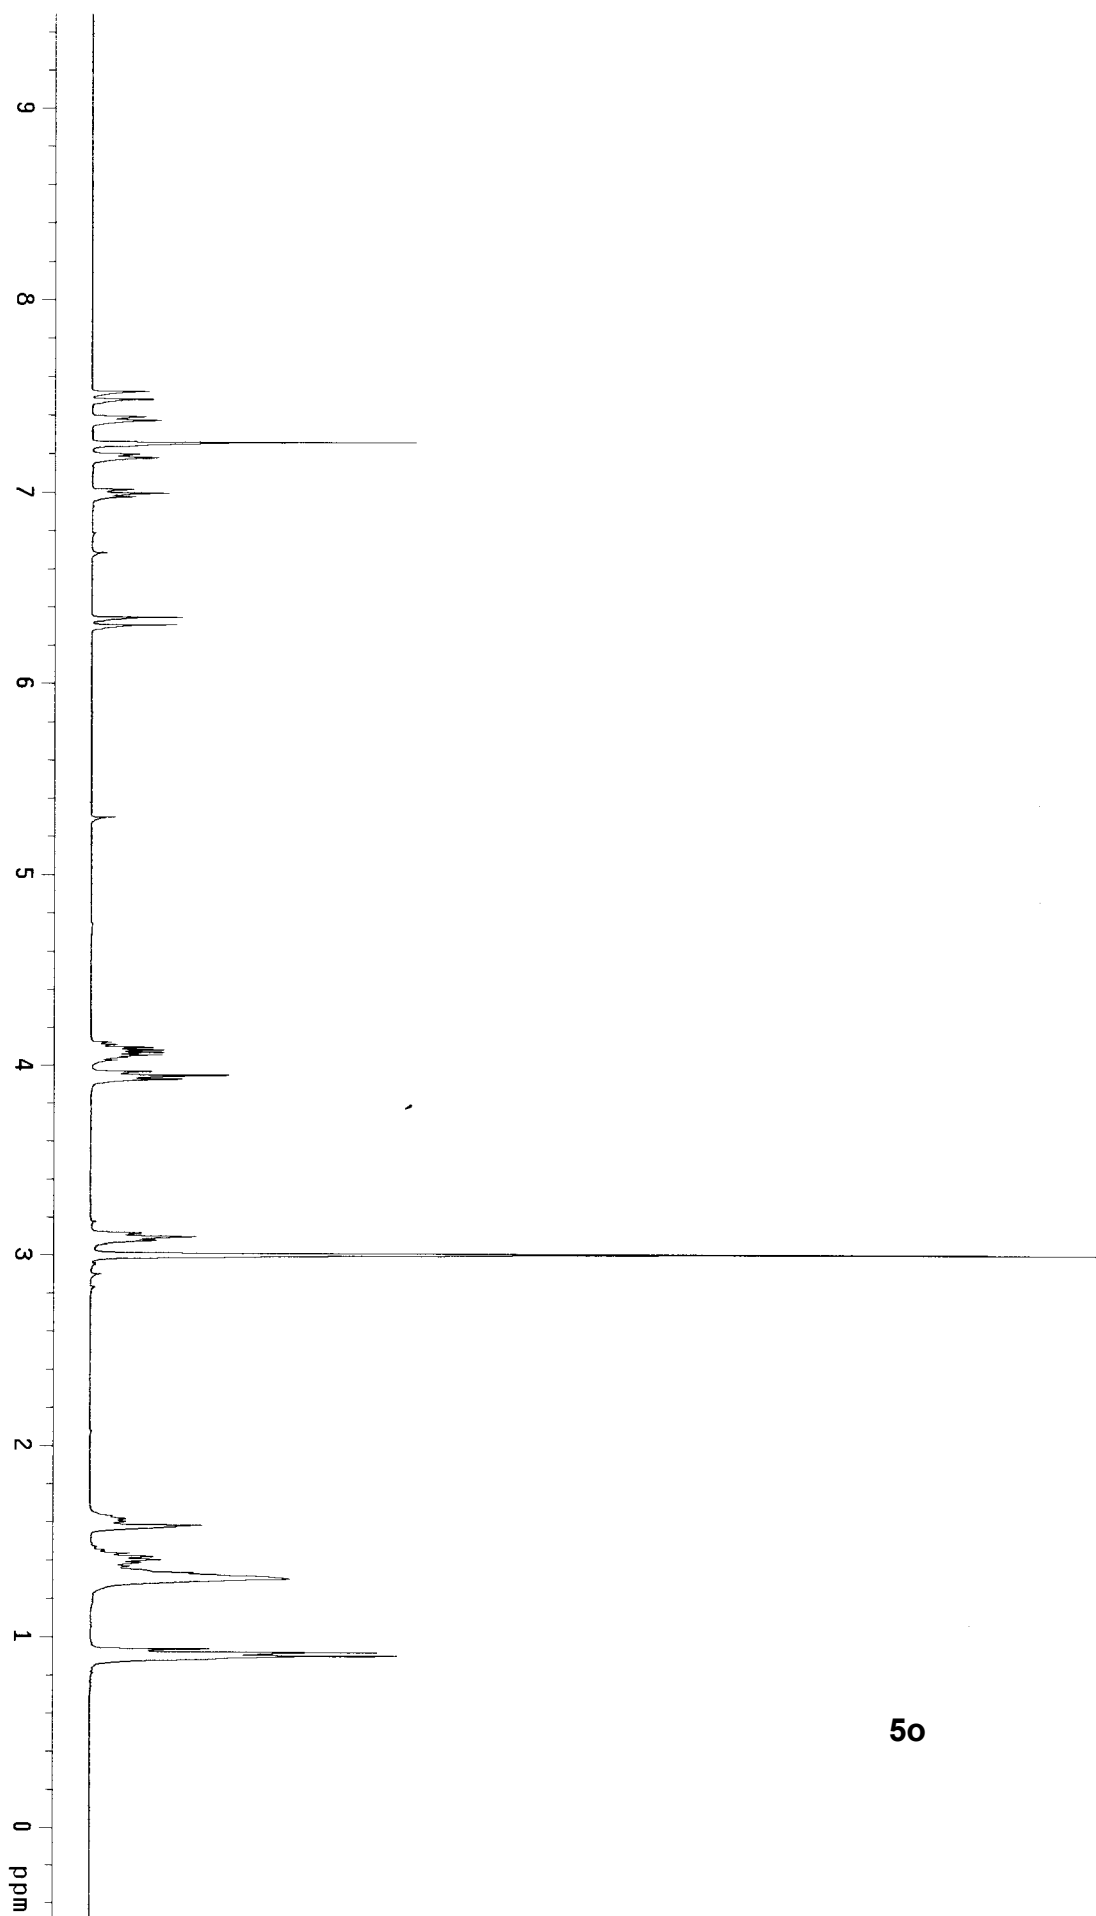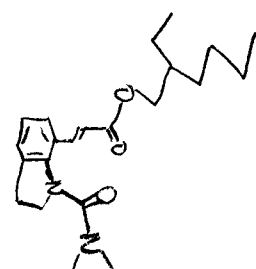

50

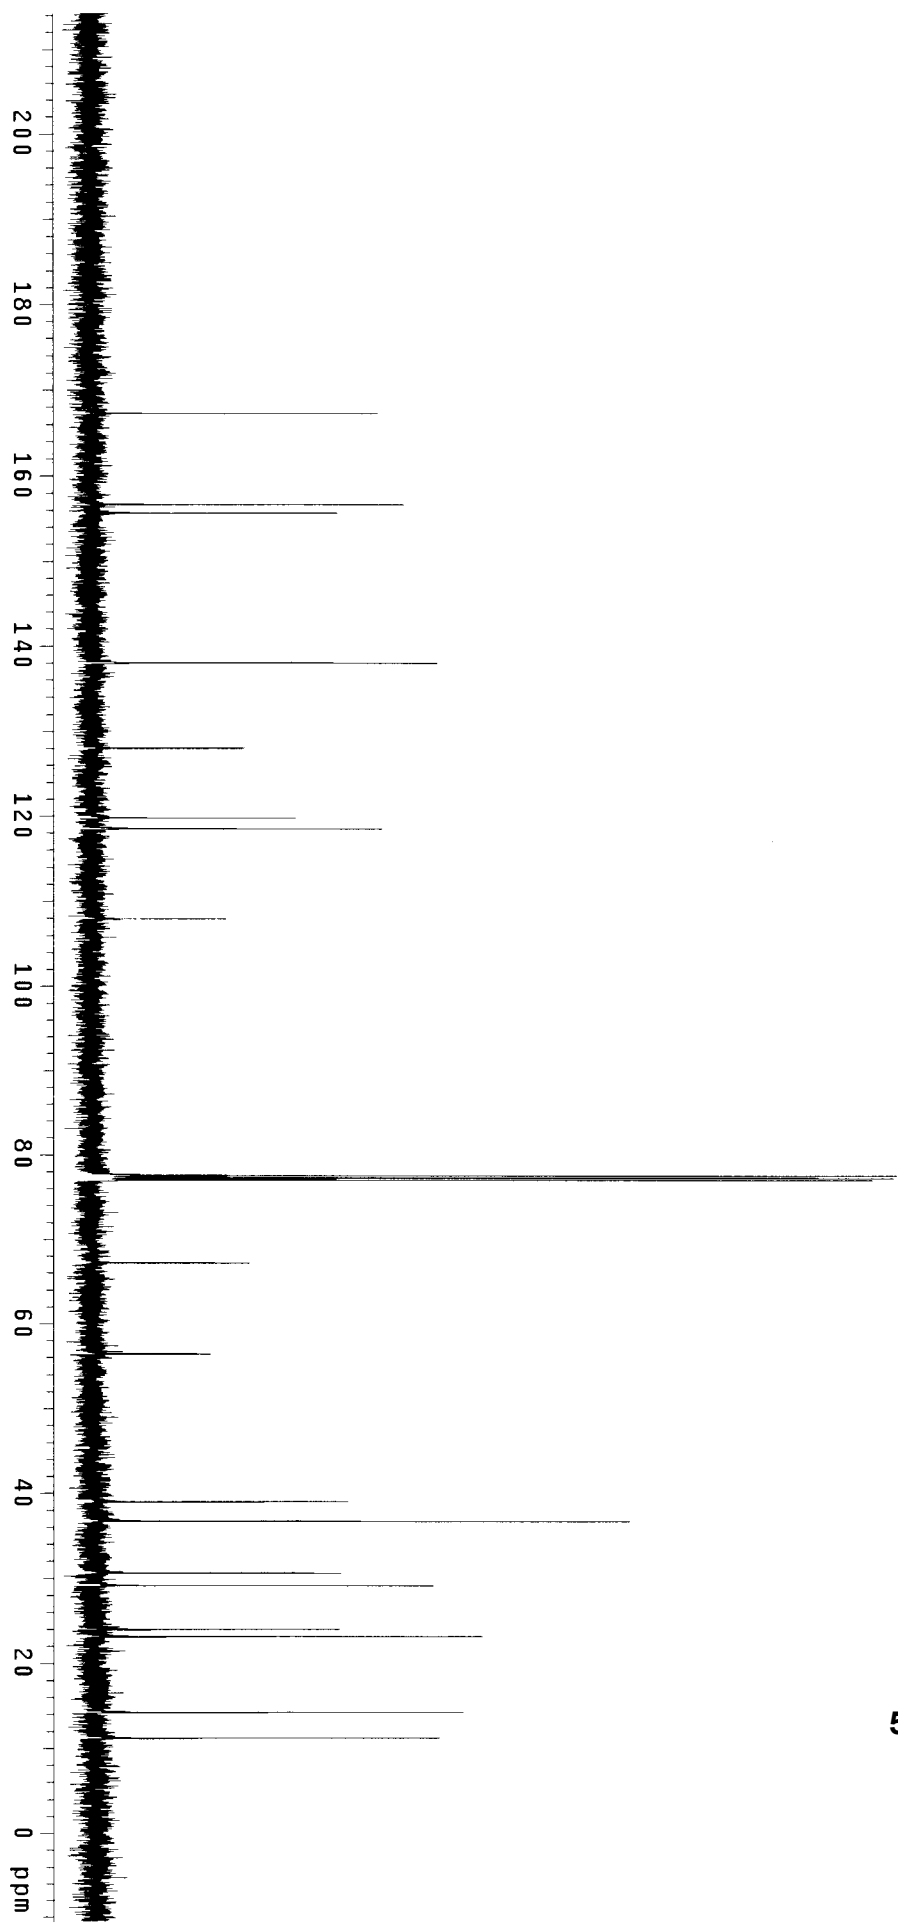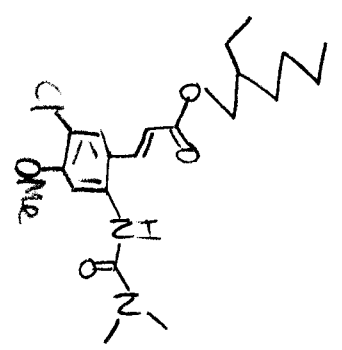

5p

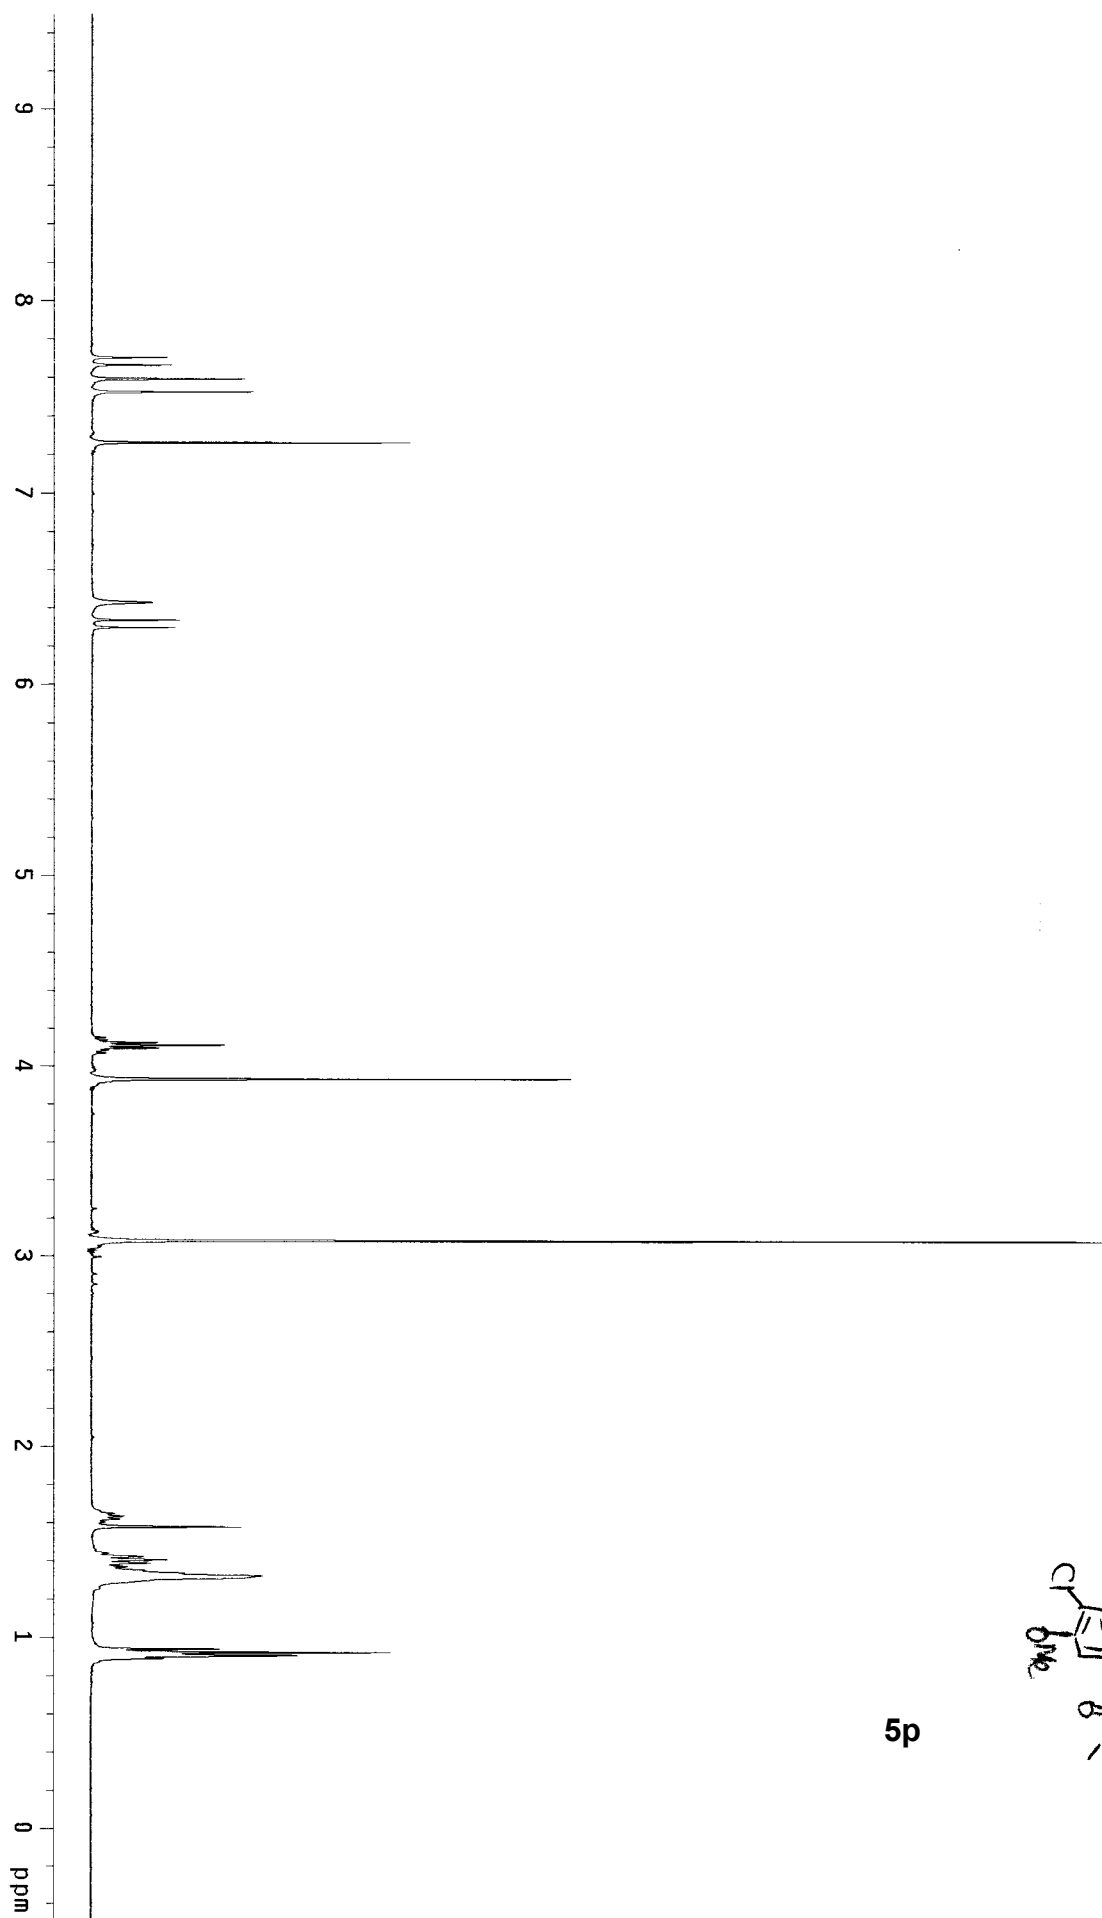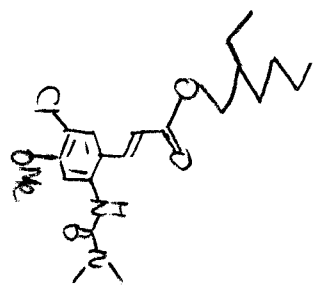

5p

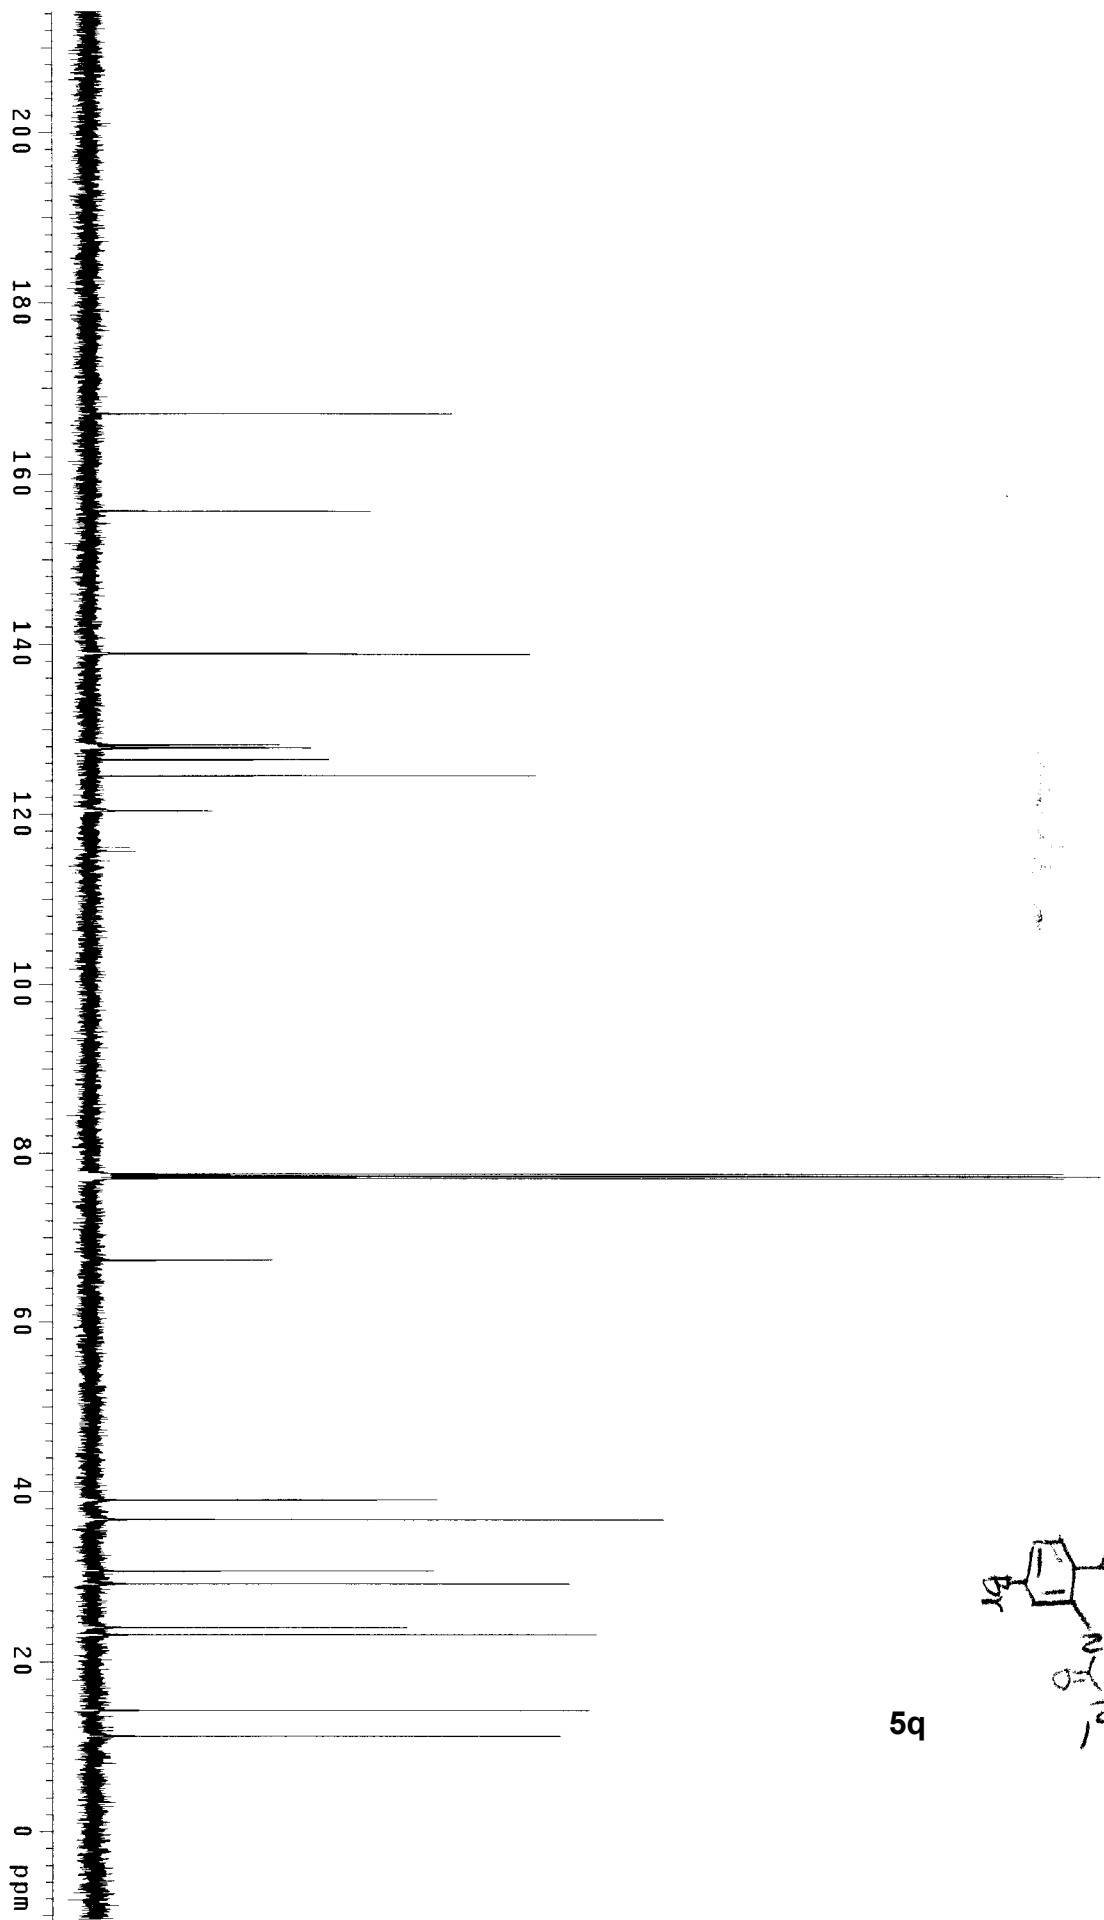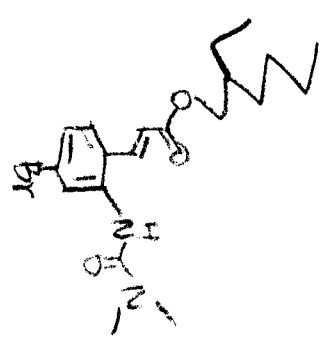

5q

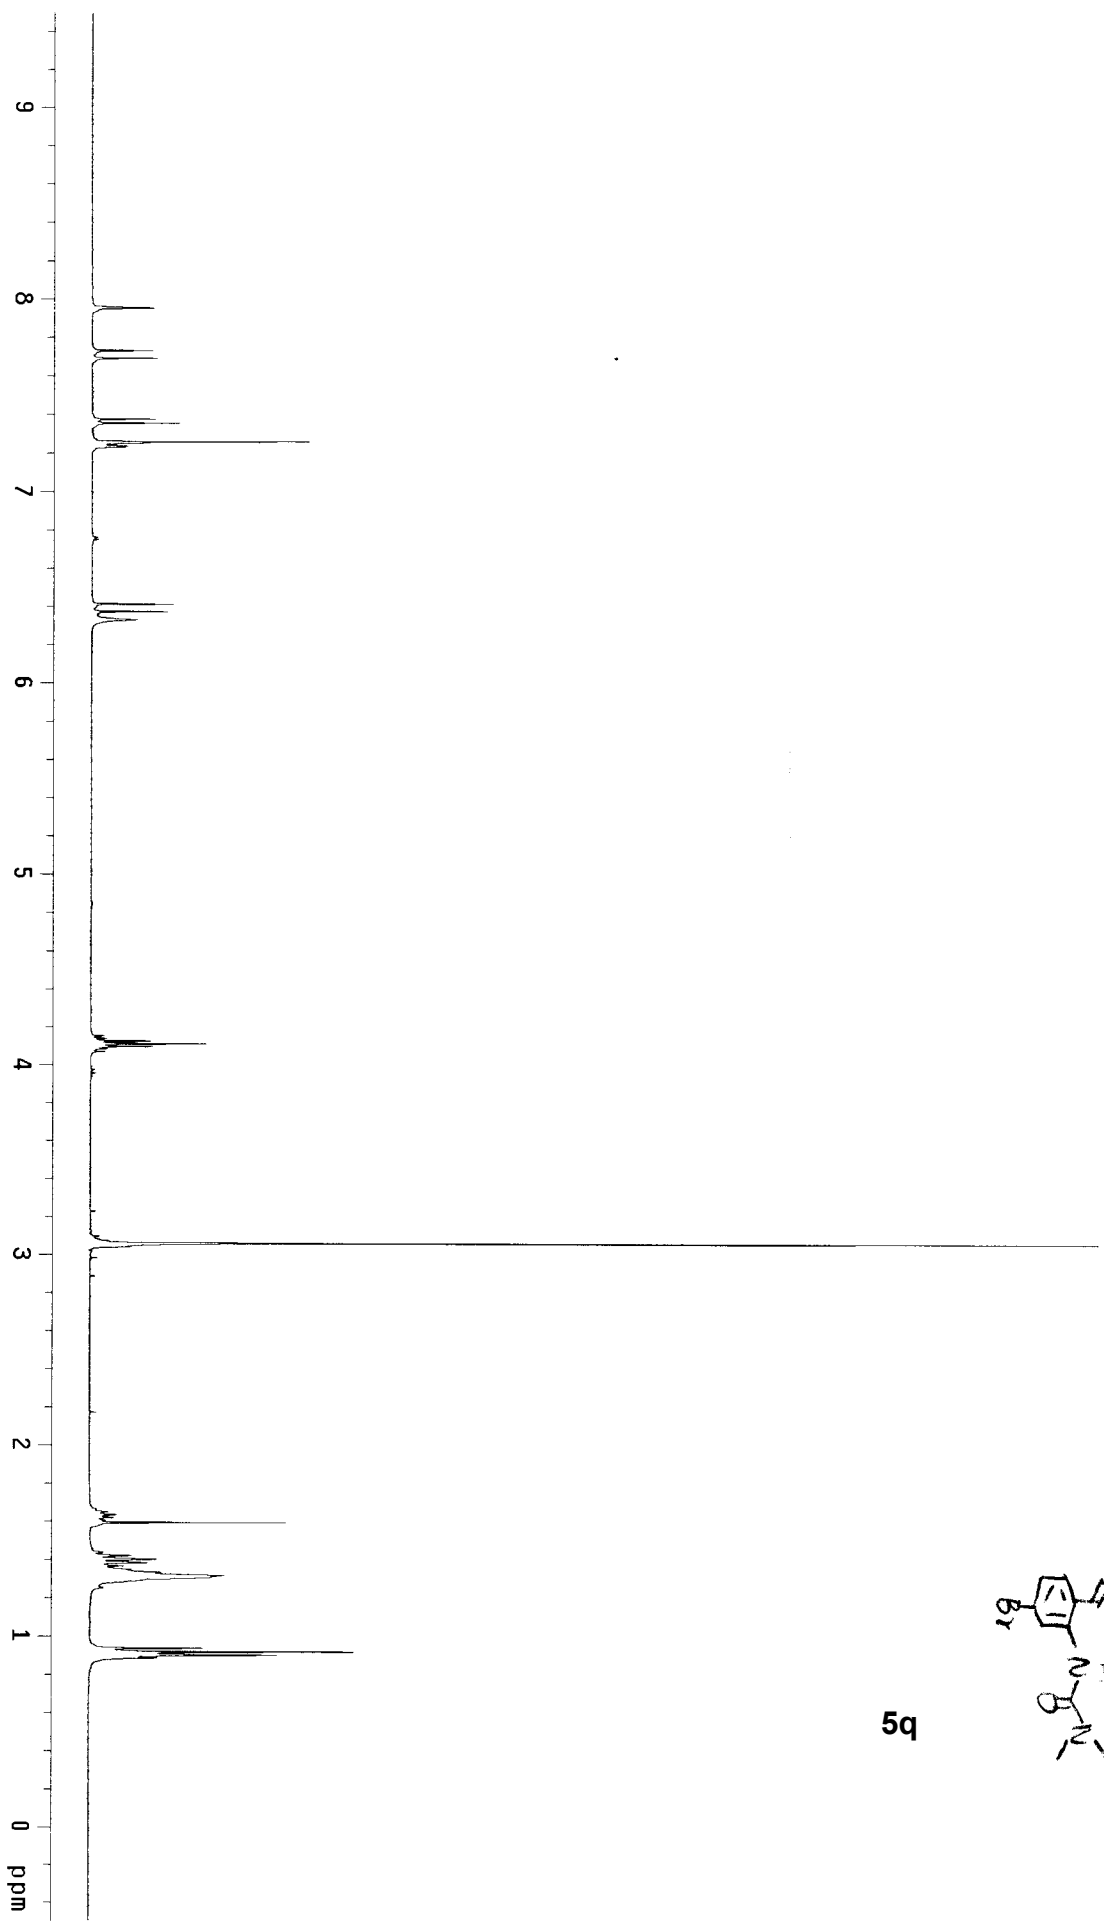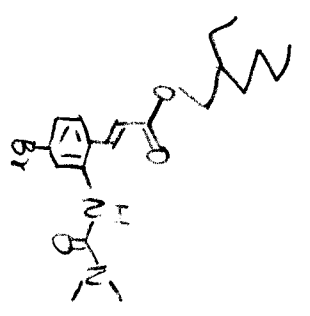

5q

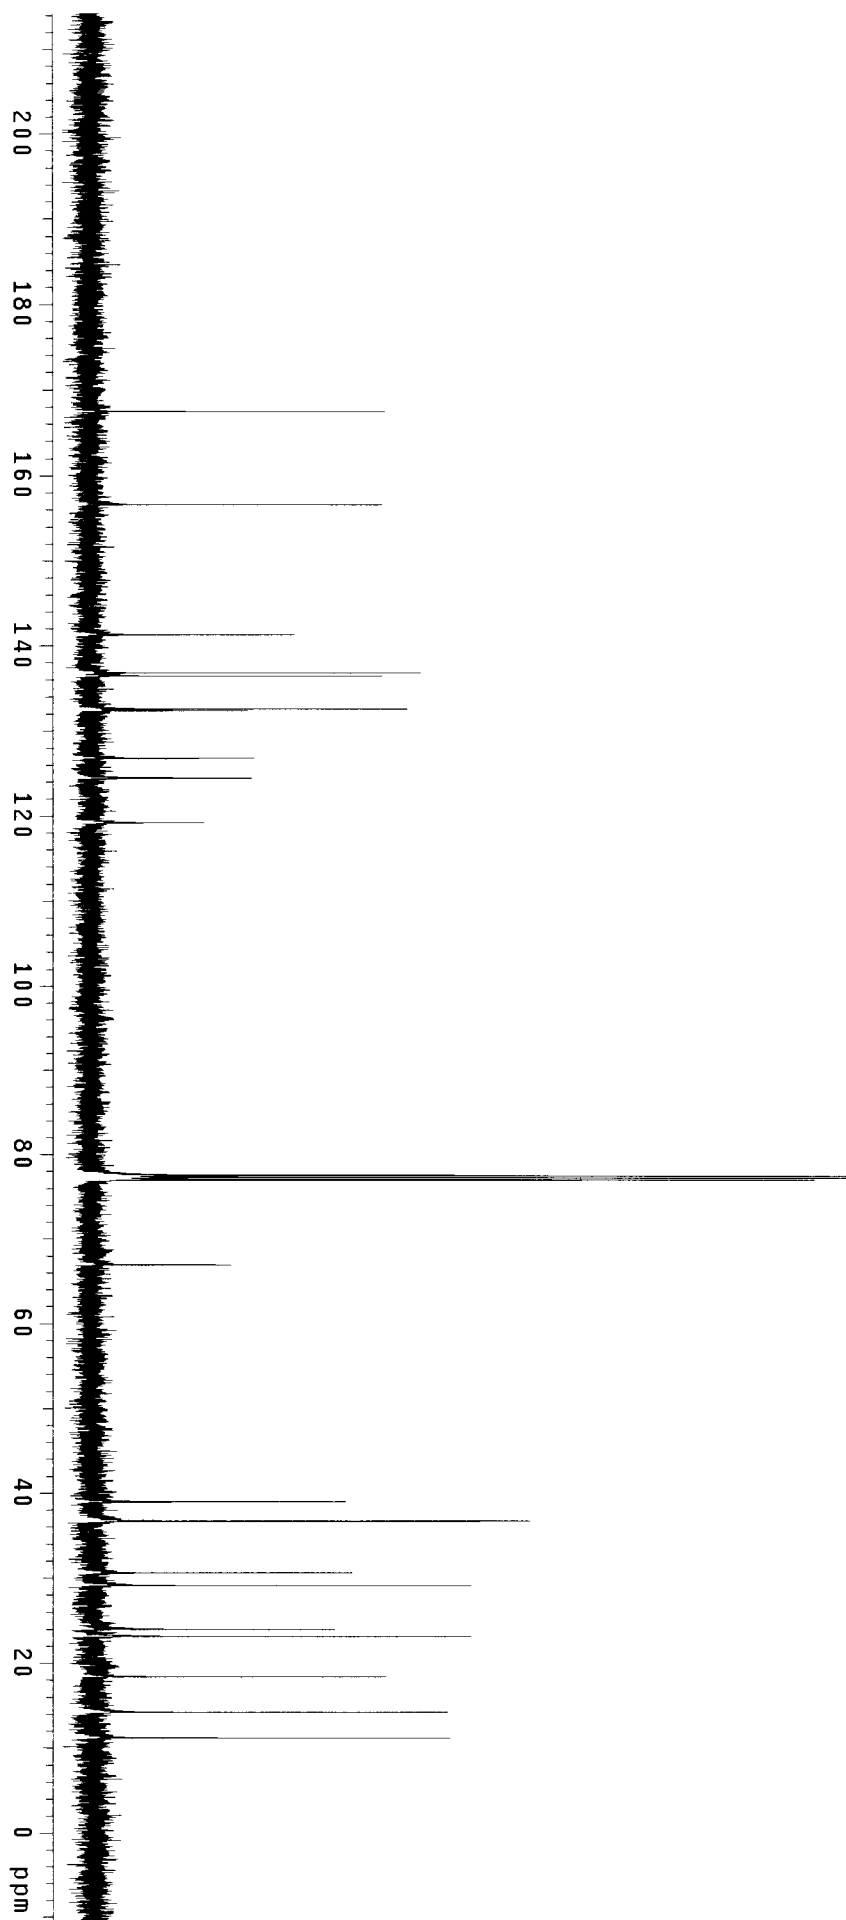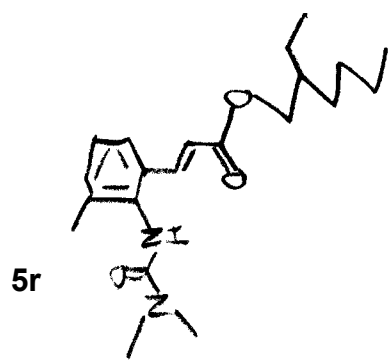



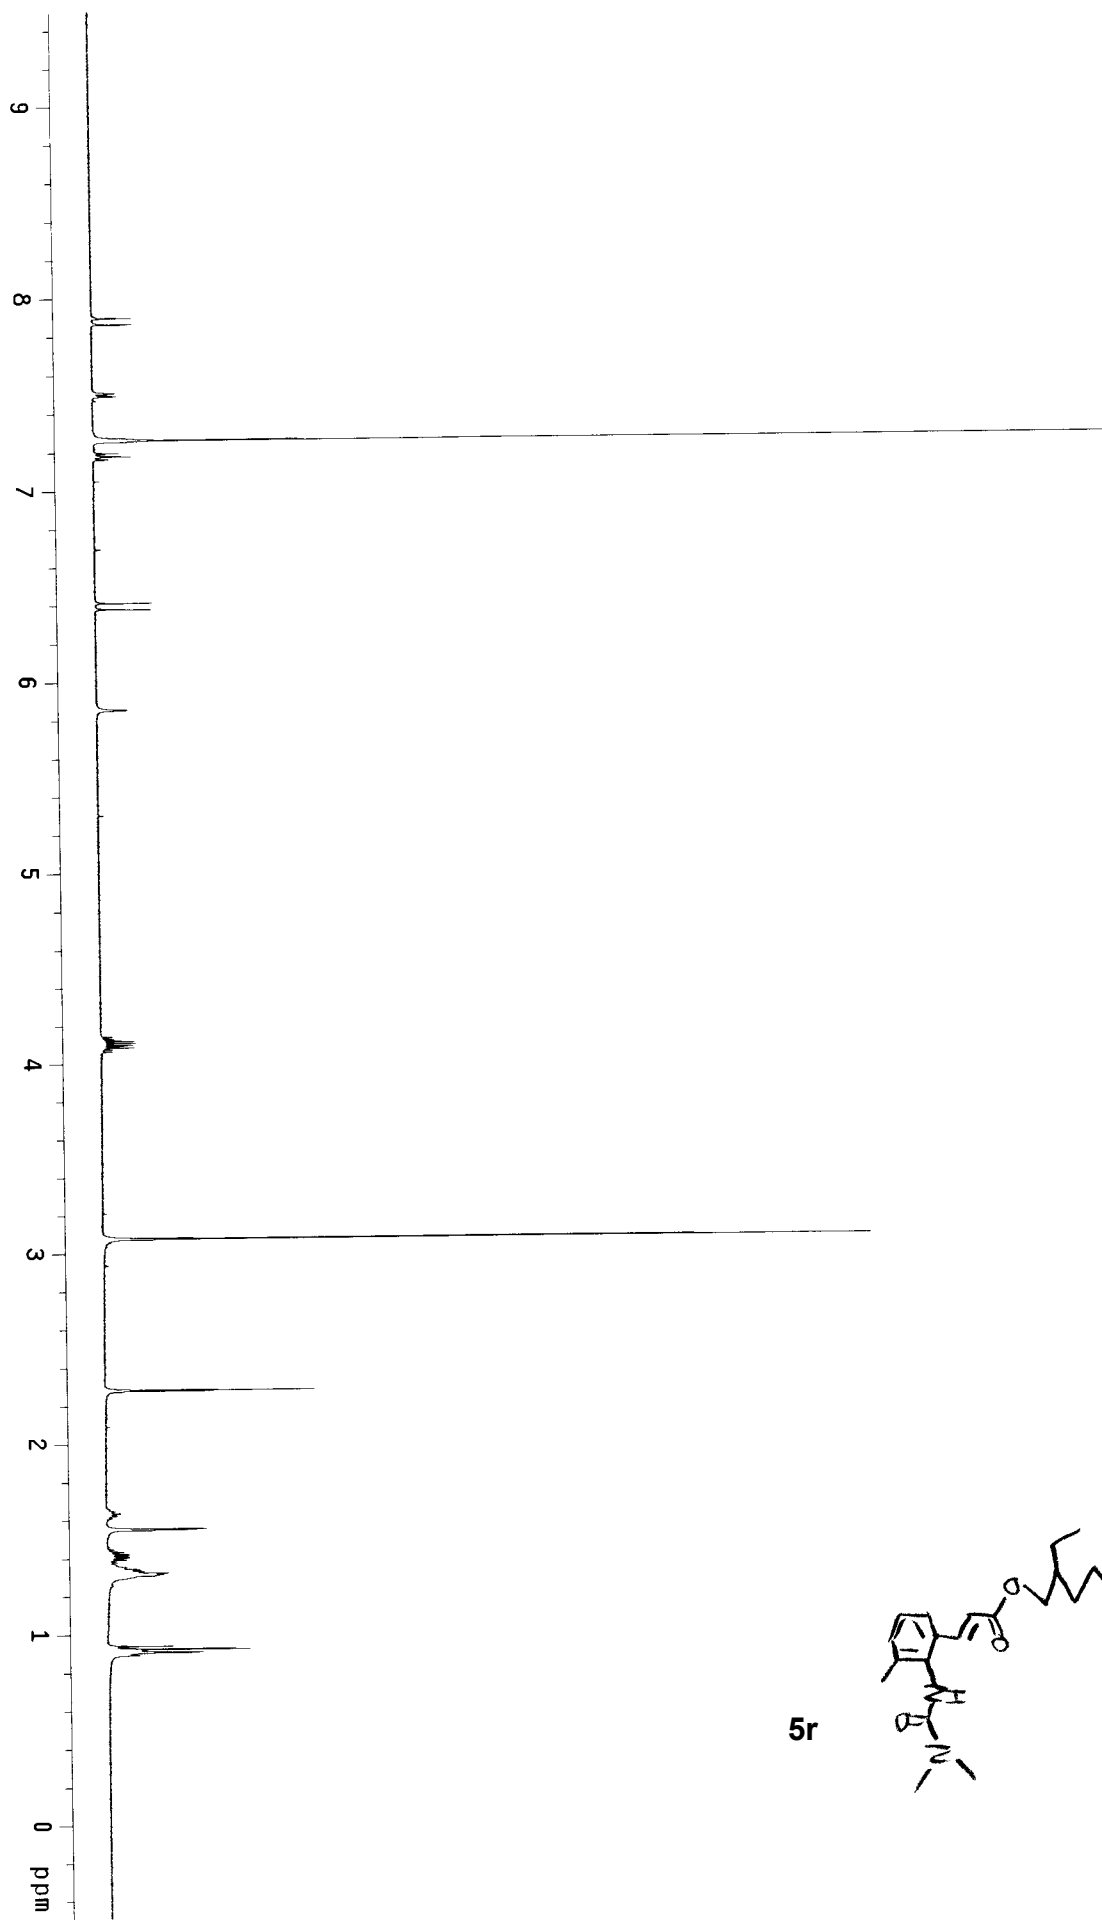

5r

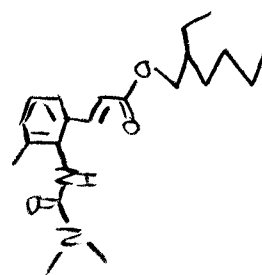

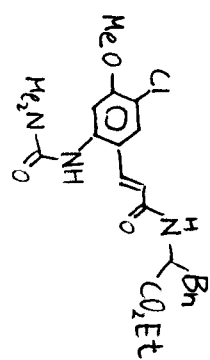

5s

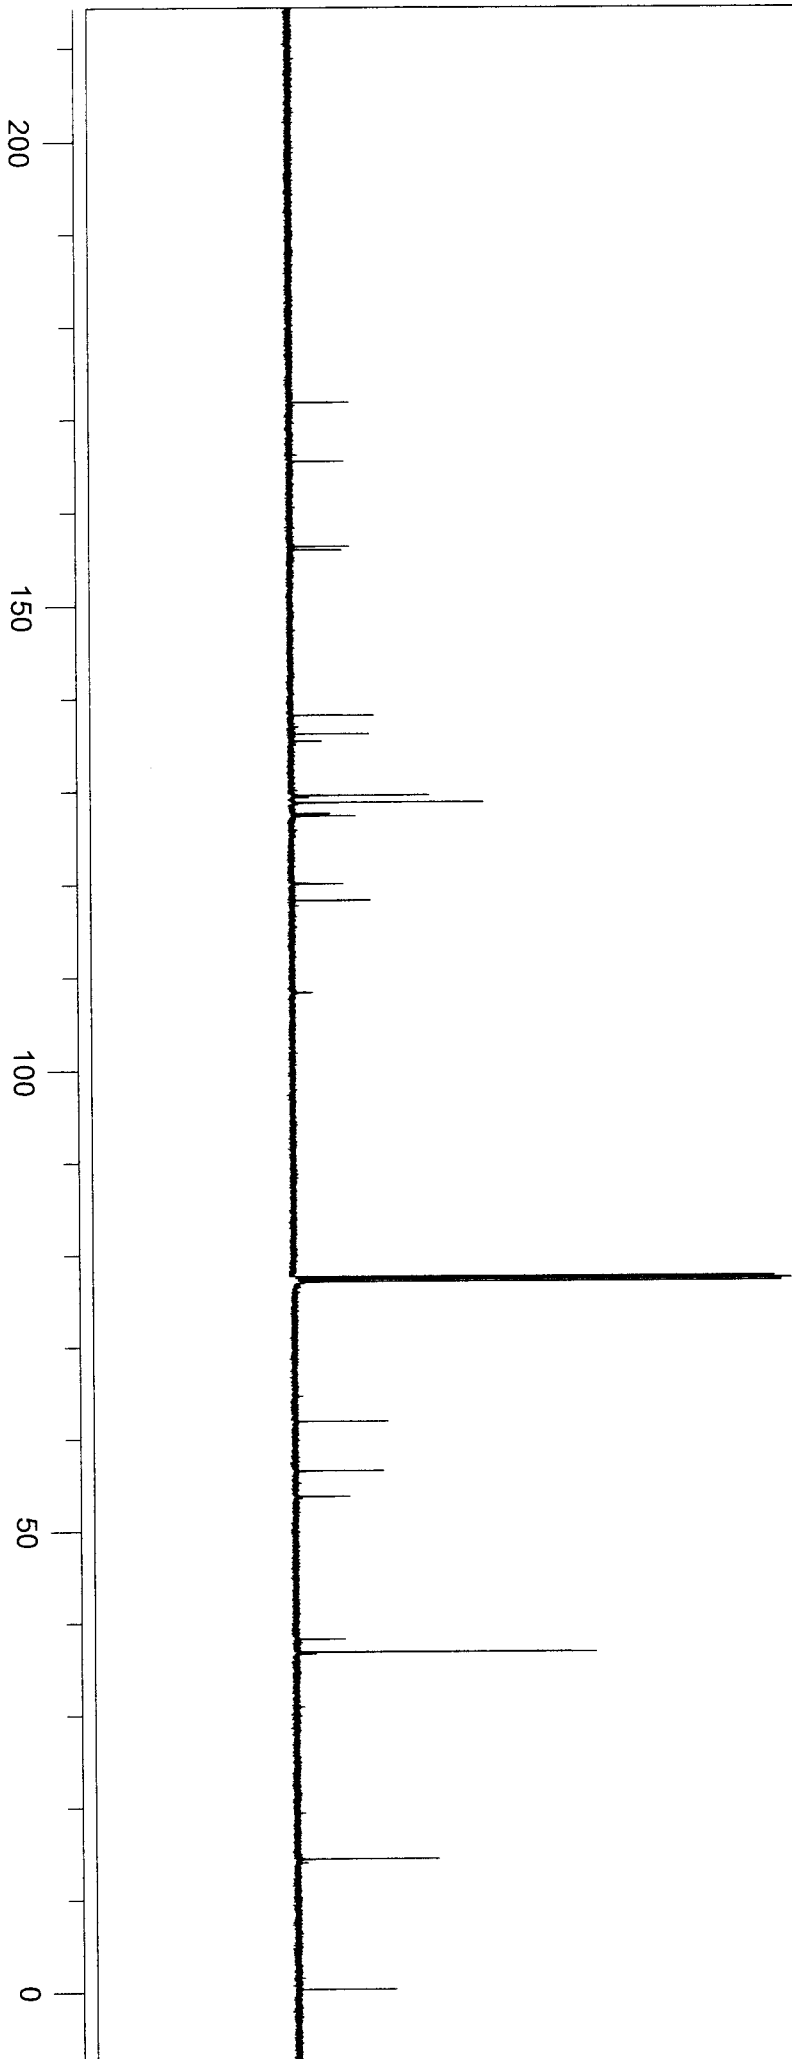

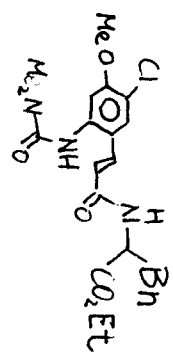

5s

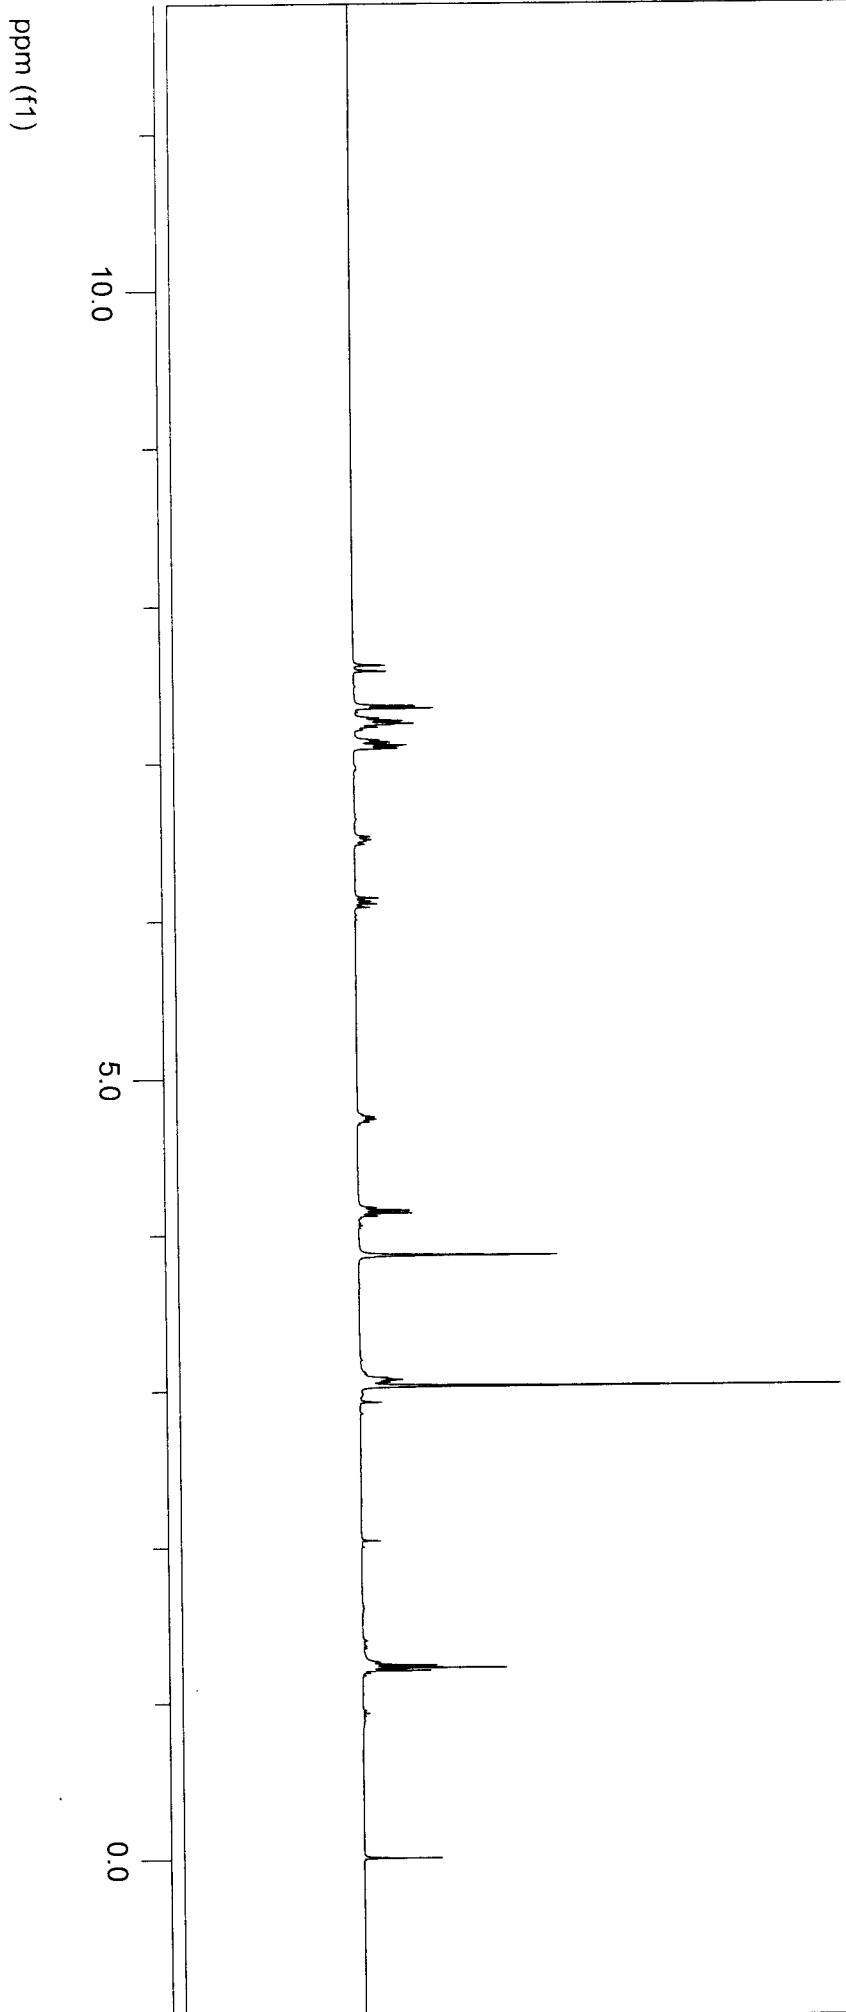

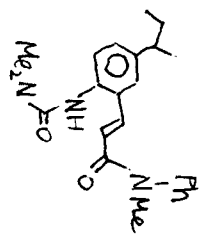

5t

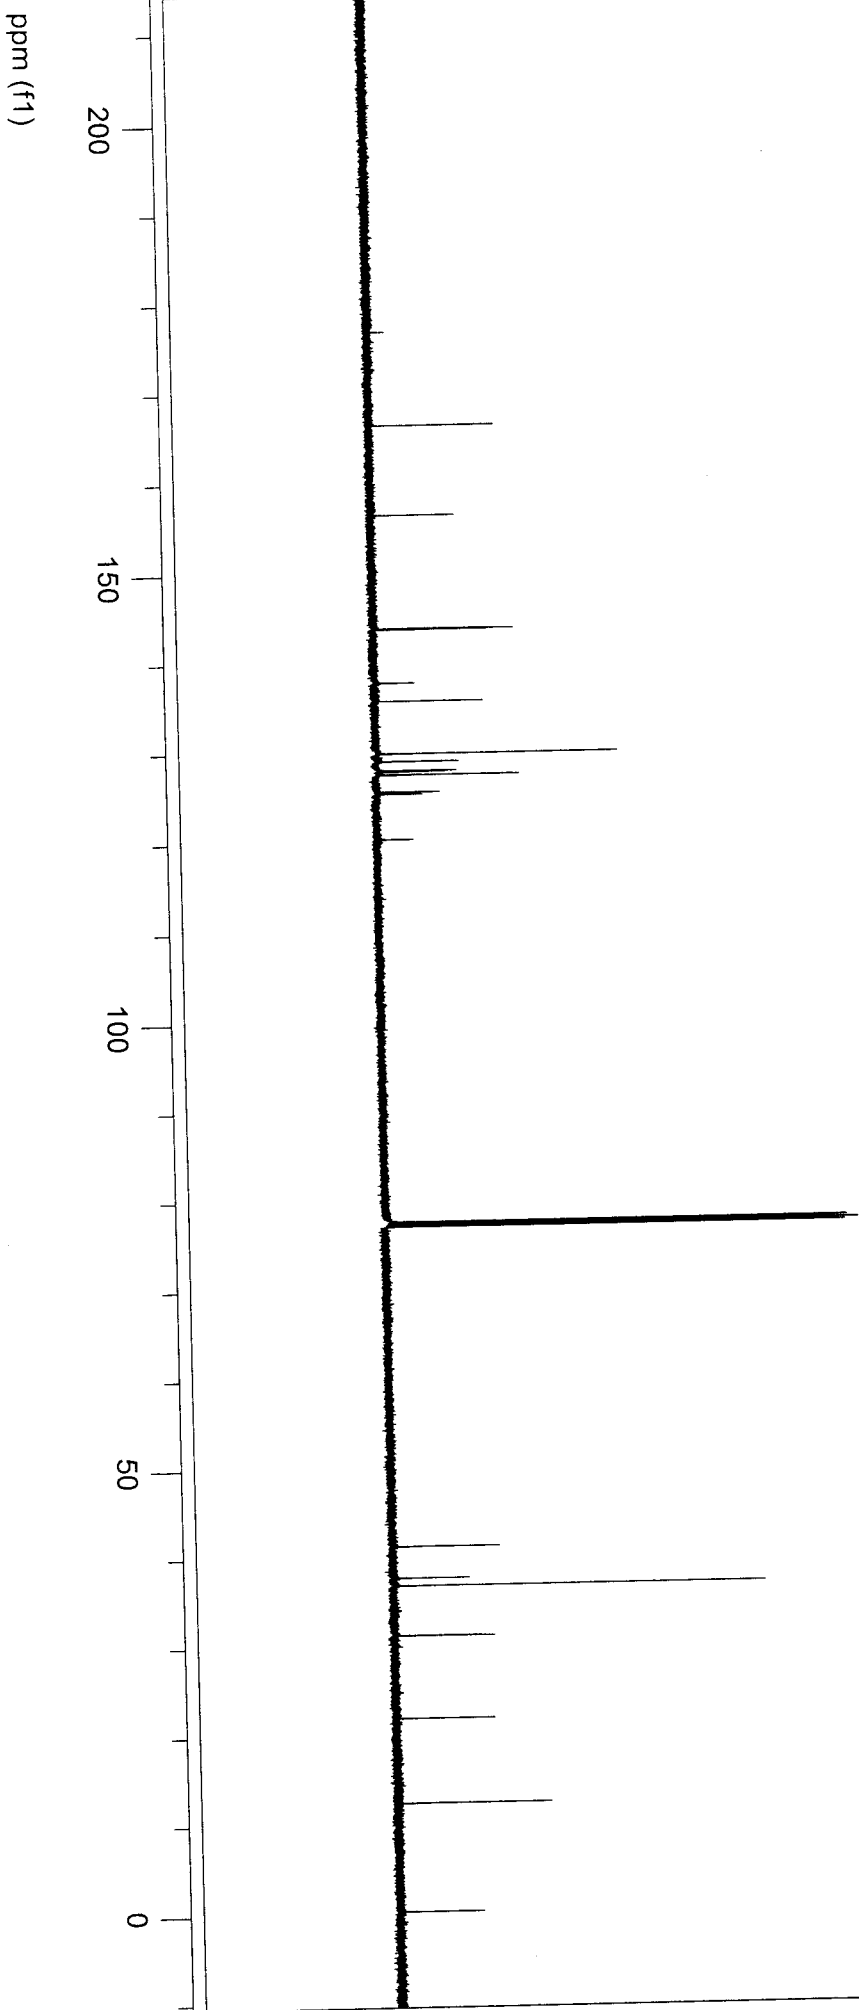

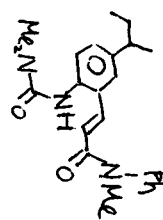

5t

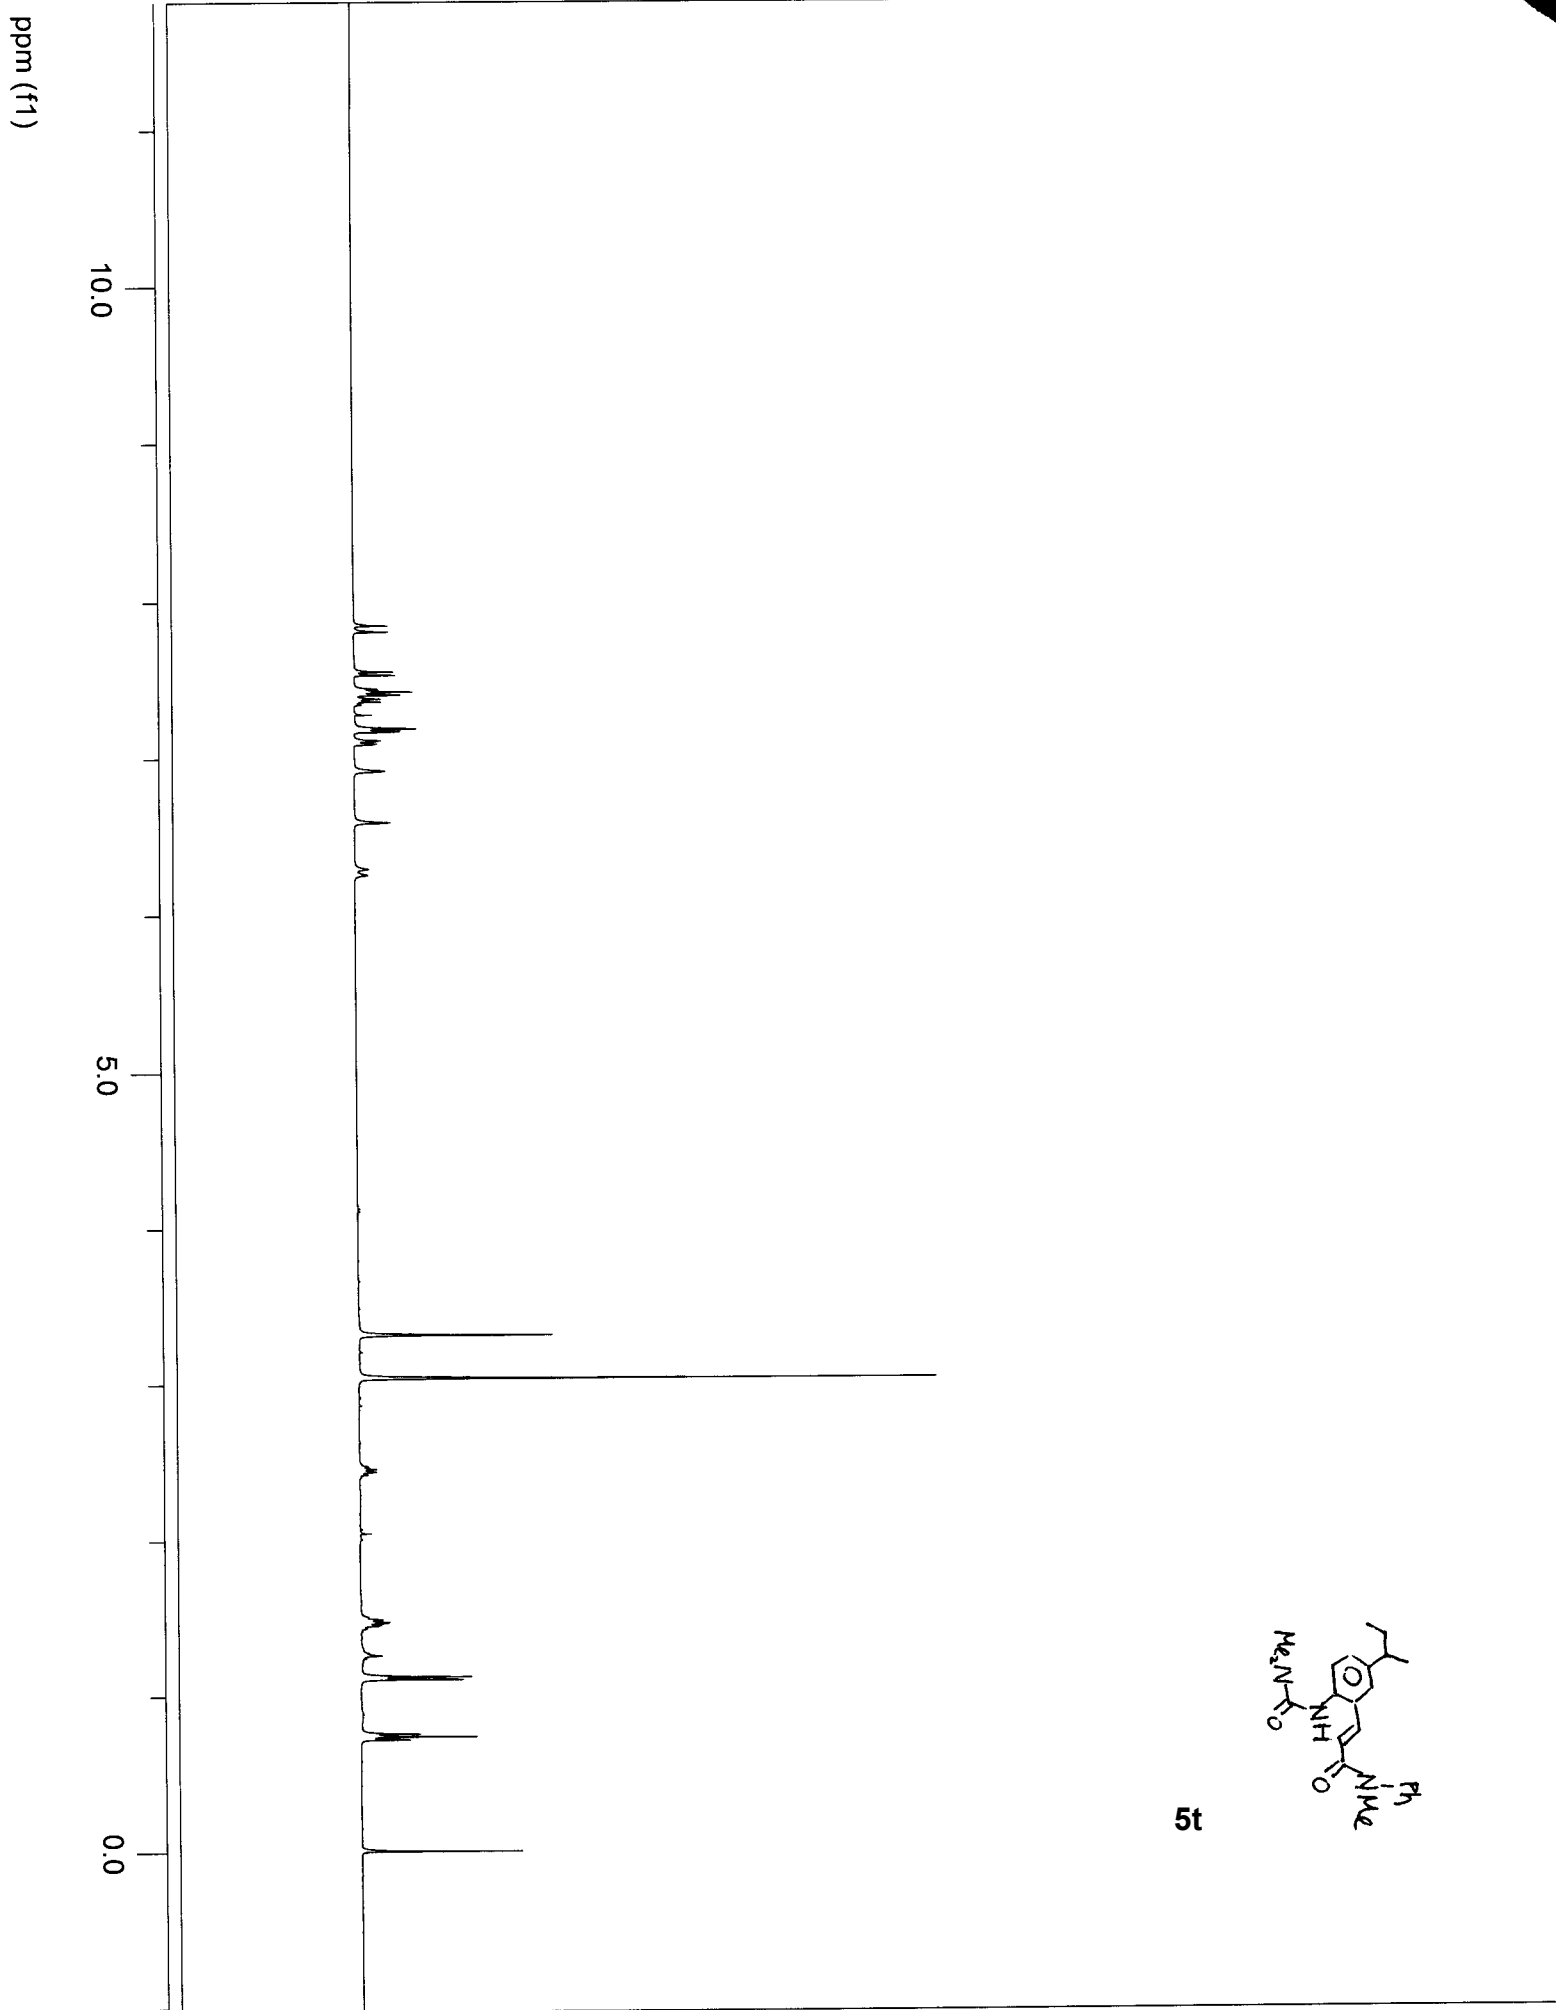

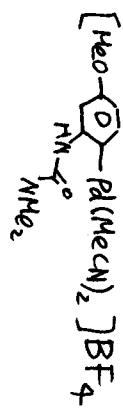

10.0

5.0

0.0

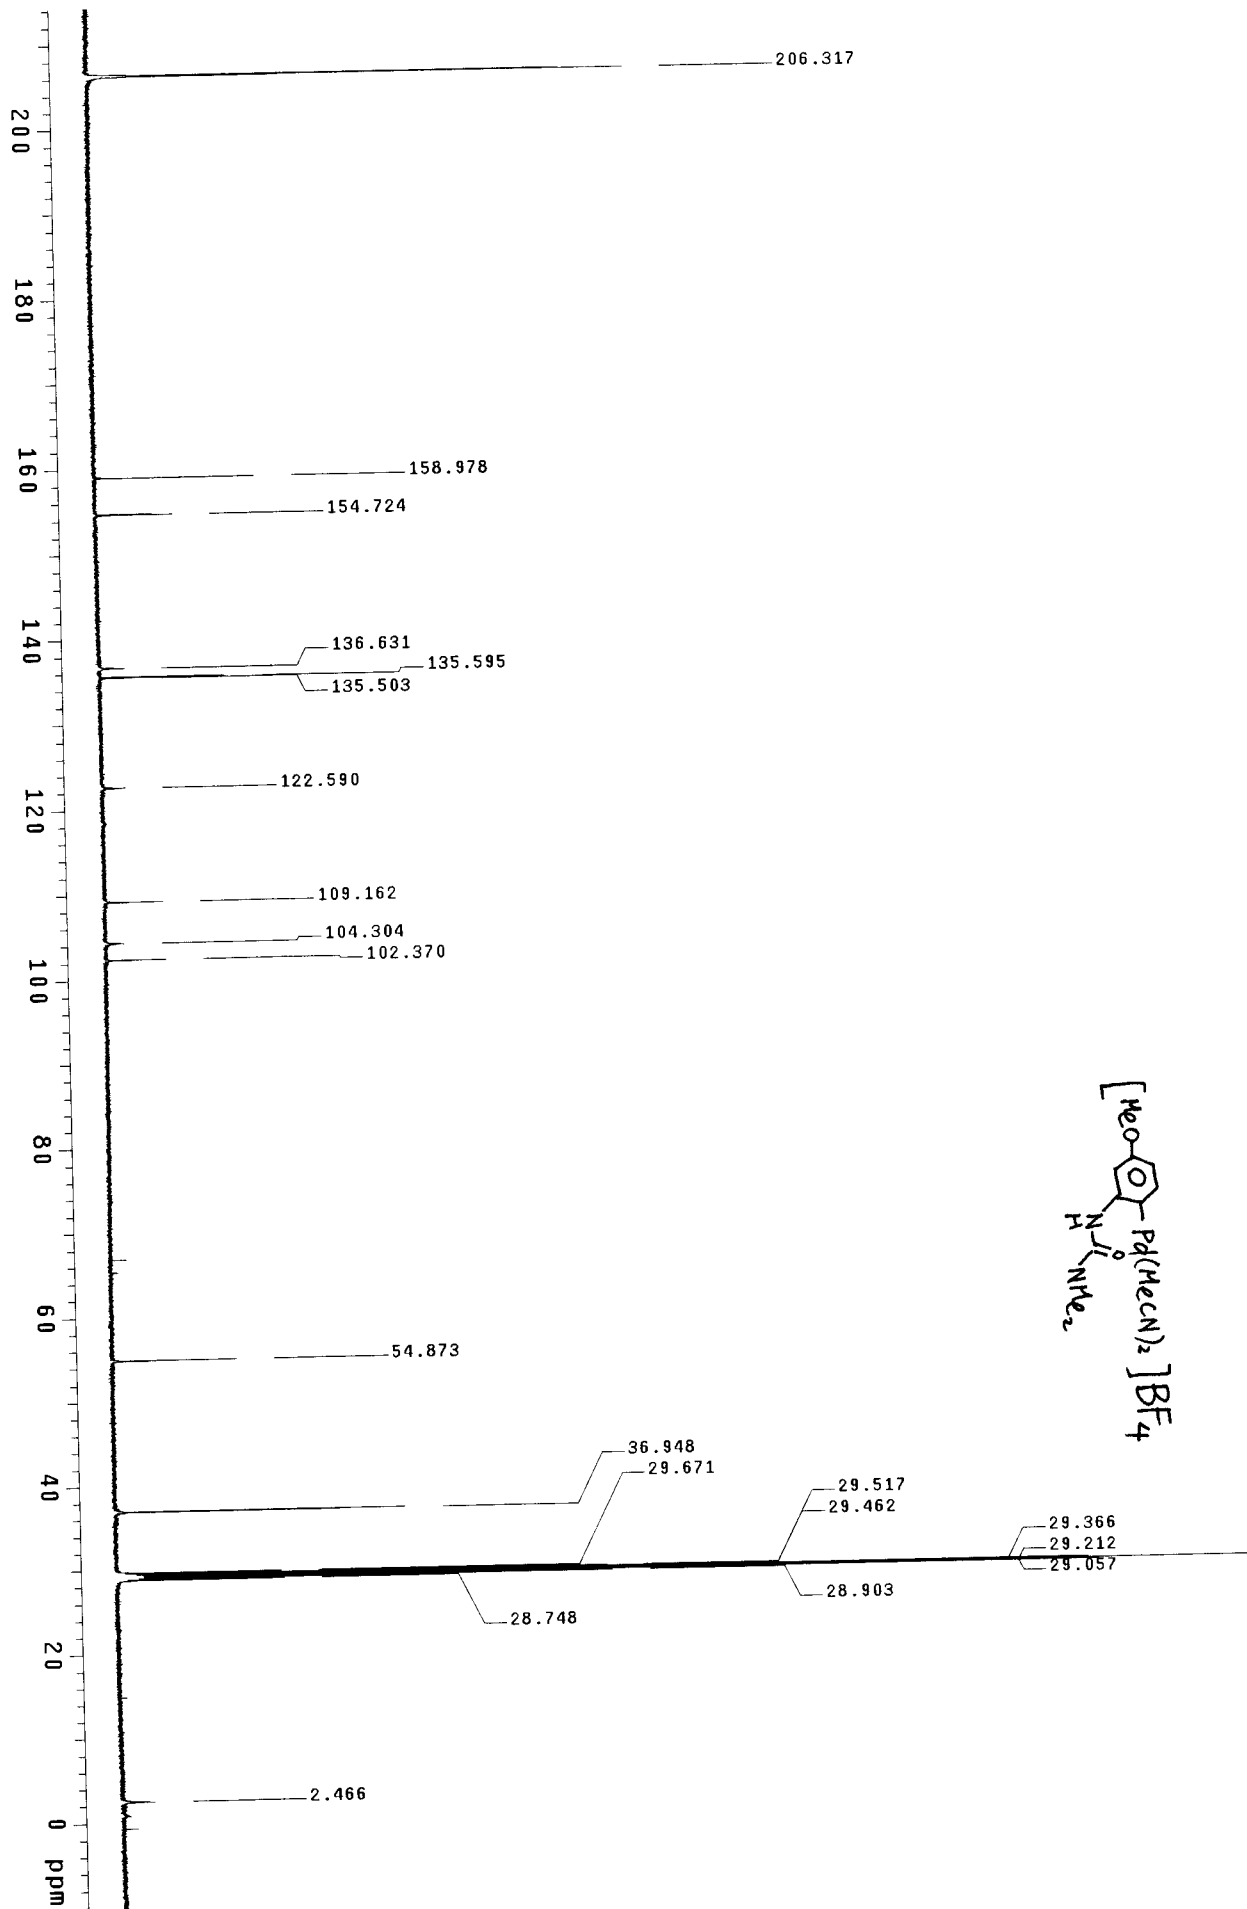

TN1F.SWP

Data Collected on:  
nmr500-inova500  
Archive directory:  
Sample directory:  
File: F19  
Pulse Sequence: s2pu1  
Solvent: acetone

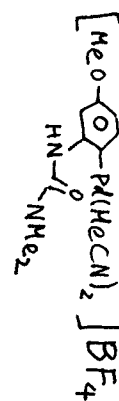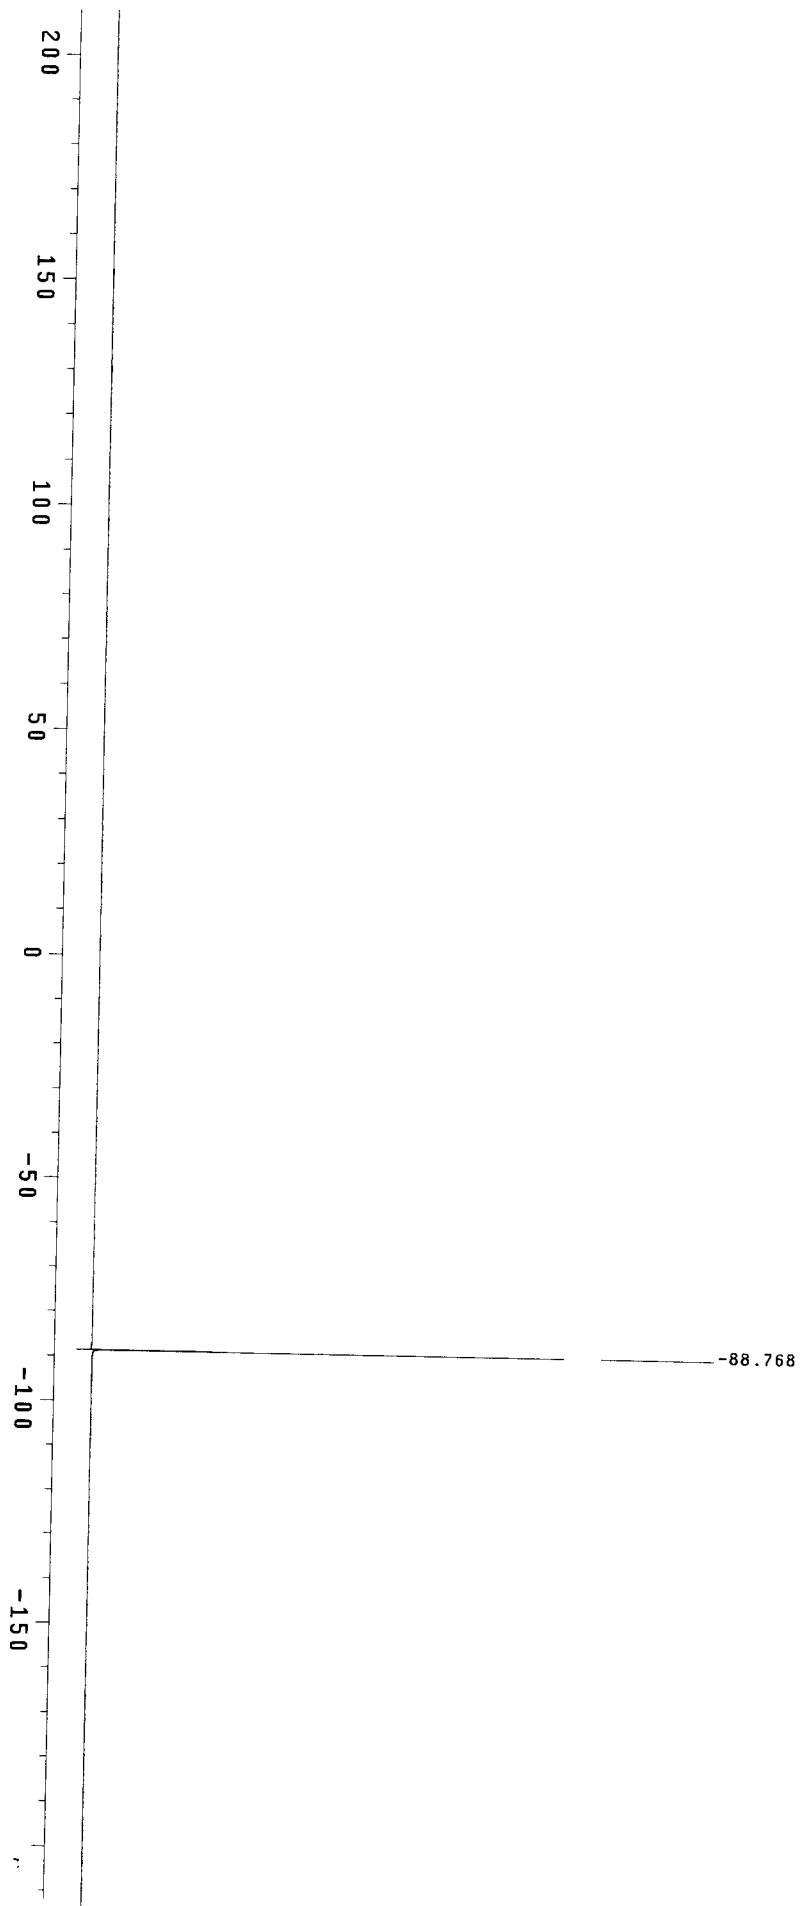



nmr2b.swp  
Data Collected on:  
nmr-500-inova500  
Archive directory:  
Sample directory:  
File: B11  
Pulse Sequence: s2pu1  
Solvent: cdcl3

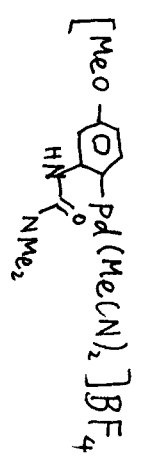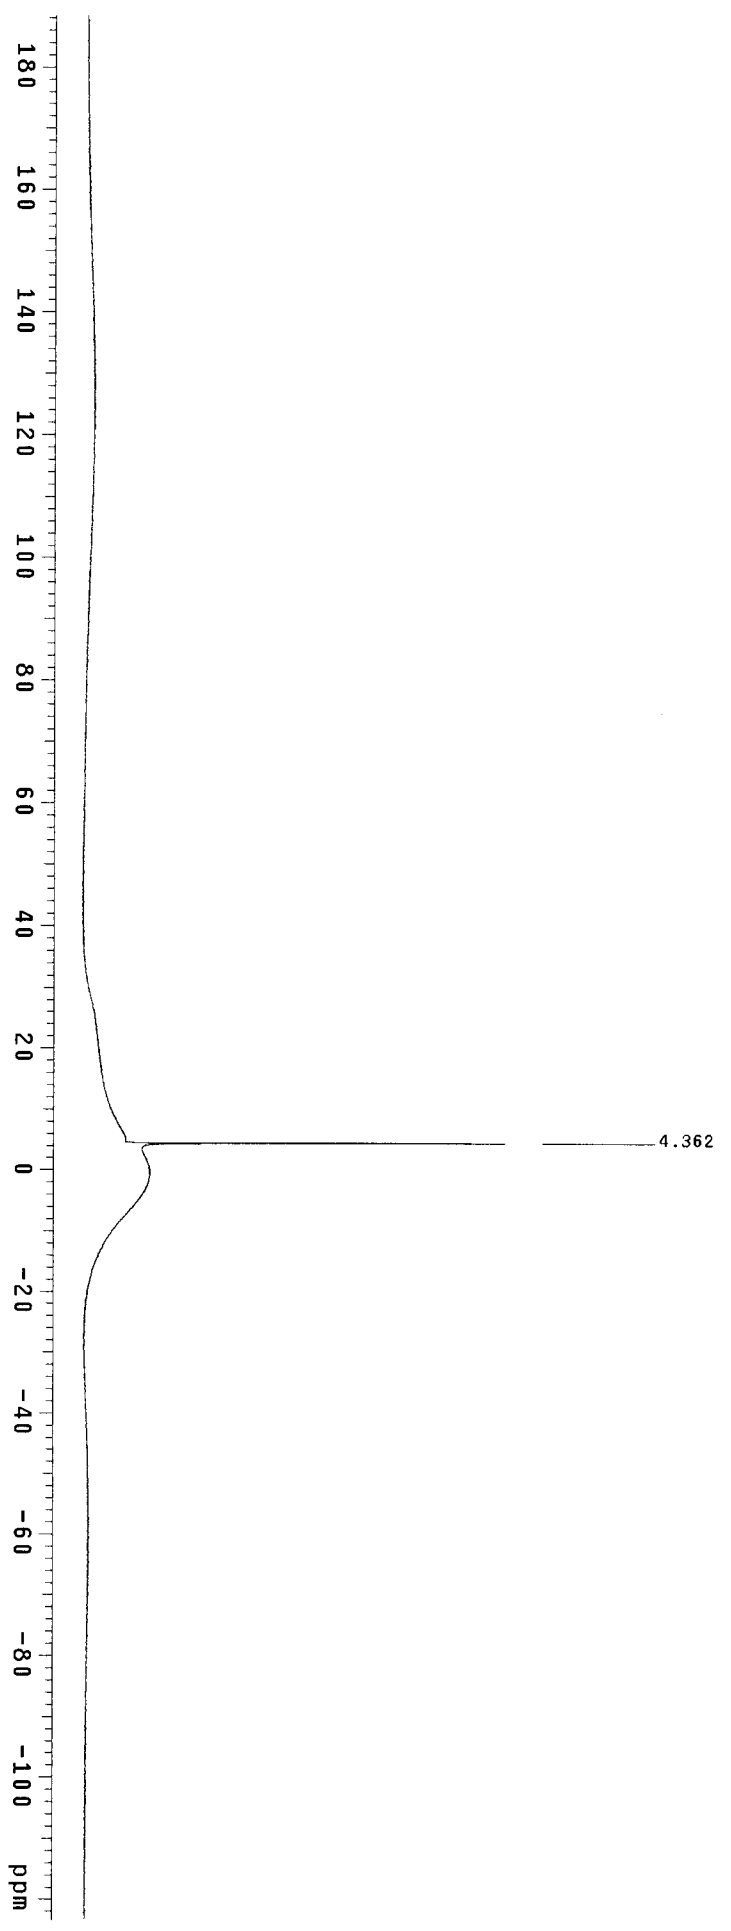

Supplement: Beilstein_J_Org_Chem-12-1040-s001.pdf [file Beilstein_J_Org_Chem-12-1040-s001.pdf]
