# Supplementary material for: Cationic Pd(II)-catalyzed C–H activation/cross-coupling reactions at room temperature: synthetic and mechanistic studies
Source: PubMed Central journal article supplement (PMC4902085; doi:10.3762/bjoc.12.99), 2016-05-20
Supplement: Beilstein_J_Org_Chem-12-1040-s003.pdf [file Beilstein_J_Org_Chem-12-1040-s003.pdf]

Supporting Information  
for  
Cationic Pd(II)-catalyzed C–H activation/cross-coupling  
reactions at room temperature: synthetic and  
mechanistic studies

Takashi Nishikata, Alexander R. Abela, Shenlin Huang and Bruce H.  
Lipshutz\*

Address: Department of Chemistry & Biochemistry, University of California,  
Santa Barbara, CA 93106, USA

Email: lipshutz@chem.ucsb.edu

\* Corresponding author

Crystal structure of 6 No 2

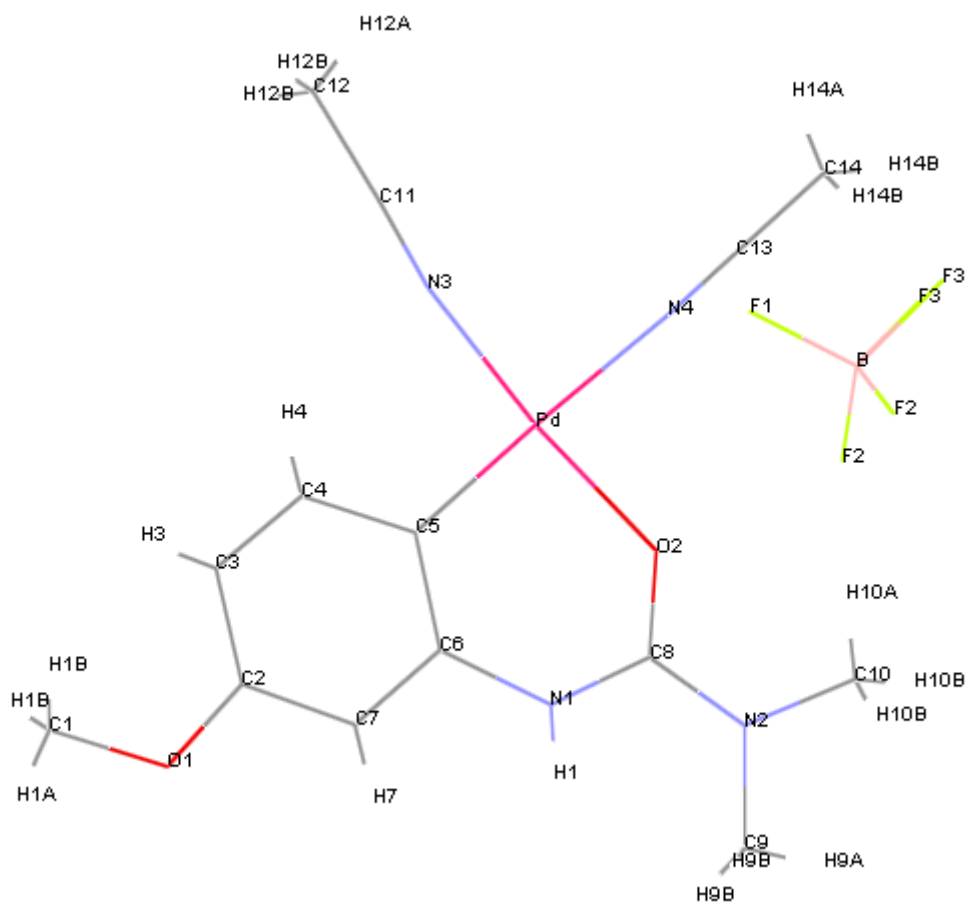

One of F atoms has disorder.

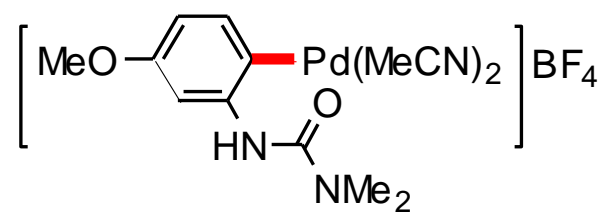

**Table 1.** Crystal data and structure refinement for palladacycle.

|                                   |                                                                                                                |
|-----------------------------------|----------------------------------------------------------------------------------------------------------------|
| Identification code               | 1                                                                                                              |
| Empirical formula                 | C14 H19 B F4 N4 O2 Pd                                                                                          |
| Formula weight                    | 468.54                                                                                                         |
| Temperature                       | 150(2) K                                                                                                       |
| Wavelength                        | 0.71073 Å                                                                                                      |
| Crystal system, space group       | Orthorhombic, Pnma                                                                                             |
| Unit cell dimensions              | a = 25.328(5) Å    alpha = 90 deg.<br>b = 6.6951(13) Å    beta = 90 deg.<br>c = 10.795(2) Å    gamma = 90 deg. |
| Volume                            | 1830.6(6) Å <sup>3</sup>                                                                                       |
| Z, Calculated density             | 4, 1.700 Mg/m <sup>3</sup>                                                                                     |
| Absorption coefficient            | 1.068 mm <sup>-1</sup>                                                                                         |
| F(000)                            | 936                                                                                                            |
| Crystal size                      | 0.25 x 0.2 x 0.08 mm                                                                                           |
| Theta range for data collection   | 2.05 to 26.76 deg.                                                                                             |
| Limiting indices                  | -31<=h<=28, -8<=k<=8, -13<=l<=13                                                                               |
| Reflections collected / unique    | 11933 / 2076 [R(int) = 0.0573]                                                                                 |
| Completeness to theta = 26.76     | 97.8 %                                                                                                         |
| Absorption correction             | Empirical                                                                                                      |
| Max. and min. transmission        | 0.291 and 0.215                                                                                                |
| Refinement method                 | Full-matrix least-squares on F <sup>2</sup>                                                                    |
| Data / restraints / parameters    | 2076 / 12 / 193                                                                                                |
| Goodness-of-fit on F <sup>2</sup> | 1.345                                                                                                          |
| Final R indices [I>2sigma(I)]     | R1 = 0.0392, wR2 = 0.0989                                                                                      |
| R indices (all data)              | R1 = 0.0455, wR2 = 0.1010                                                                                      |
| Extinction coefficient            | 0.0040(7)                                                                                                      |
| Largest diff. peak and hole       | 0.789 and -0.815 e. Å <sup>-3</sup>                                                                            |

Table 2. Atomic coordinates ( $\times 10^4$ ) and equivalent isotropic displacement parameters ( $\text{\AA}^2 \times 10^3$ ) for 1.

U(eq) is defined as one third of the trace of the orthogonalized Uij tensor.

|       | x        | y       | z        | U(eq) |
|-------|----------|---------|----------|-------|
| B     | 7970(3)  | 7500    | 5625(6)  | 49(2) |
| C(1)  | 11670(2) | 2500    | -1426(5) | 40(1) |
| C(2)  | 11080(2) | 2500    | 302(4)   | 25(1) |
| C(3)  | 10630(2) | 2500    | -420(5)  | 26(1) |
| C(4)  | 10142(2) | 2500    | 141(4)   | 28(1) |
| C(5)  | 10070(2) | 2500    | 1414(4)  | 20(1) |
| C(6)  | 10530(2) | 2500    | 2130(4)  | 23(1) |
| C(7)  | 11027(2) | 2500    | 1582(4)  | 23(1) |
| C(8)  | 10137(2) | 2500    | 4234(4)  | 25(1) |
| C(9)  | 10772(2) | 2500    | 5942(5)  | 47(2) |
| C(10) | 9815(2)  | 2500    | 6360(5)  | 34(1) |
| C(11) | 8702(2)  | 2500    | -273(5)  | 28(1) |
| C(12) | 8364(2)  | 2500    | -1359(5) | 35(1) |
| C(13) | 8203(2)  | 2500    | 3480(4)  | 33(1) |
| C(14) | 7683(2)  | 2500    | 4028(6)  | 41(1) |
| F(1)  | 7950(1)  | 7500    | 4347(3)  | 54(1) |
| F(2)  | 8257(2)  | 9112(4) | 6026(3)  | 96(1) |
| F(3)  | 7493(2)  | 8216(9) | 6066(4)  | 73(2) |
| N(1)  | 10542(1) | 2500    | 3448(4)  | 24(1) |
| N(2)  | 10239(2) | 2500    | 5451(4)  | 31(1) |
| N(3)  | 8980(1)  | 2500    | 556(4)   | 29(1) |
| N(4)  | 8608(2)  | 2500    | 3057(4)  | 30(1) |
| O(1)  | 11589(1) | 2500    | -112(3)  | 38(1) |
| O(2)  | 9661(1)  | 2500    | 3877(3)  | 29(1) |
| Pd    | 9359(1)  | 2500    | 2177(1)  | 24(1) |

Table 3. Bond lengths [Å] and angles [deg] for 1.

---

|                |            |
|----------------|------------|
| B-F (2)        | 1.372 (5)  |
| B-F (2) #1     | 1.372 (5)  |
| B-F (1)        | 1.381 (7)  |
| B-F (3) #1     | 1.384 (8)  |
| B-F (3)        | 1.384 (8)  |
| C (1)-O (1)    | 1.433 (6)  |
| C (1)-H (1A)   | 0.93 (6)   |
| C (1)-H (1B)   | 0.96 (4)   |
| C (2)-O (1)    | 1.366 (5)  |
| C (2)-C (3)    | 1.380 (6)  |
| C (2)-C (7)    | 1.388 (6)  |
| C (3)-C (4)    | 1.377 (6)  |
| C (3)-H (3)    | 0.9300     |
| C (4)-C (5)    | 1.387 (6)  |
| C (4)-H (4)    | 0.9300     |
| C (5)-C (6)    | 1.399 (6)  |
| C (5)-Pd       | 1.980 (4)  |
| C (6)-C (7)    | 1.390 (6)  |
| C (6)-N (1)    | 1.422 (6)  |
| C (7)-H (7)    | 0.9300     |
| C (8)-O (2)    | 1.266 (5)  |
| C (8)-N (1)    | 1.332 (6)  |
| C (8)-N (2)    | 1.340 (6)  |
| C (9)-N (2)    | 1.449 (7)  |
| C (9)-H (9A)   | 0.961 (10) |
| C (9)-H (9B)   | 0.961 (10) |
| C (10)-N (2)   | 1.455 (6)  |
| C (10)-H (10A) | 0.958 (10) |
| C (10)-H (10B) | 0.961 (10) |
| C (11)-N (3)   | 1.139 (6)  |
| C (11)-C (12)  | 1.451 (7)  |
| C (12)-H (12A) | 0.951 (10) |
| C (12)-H (12B) | 0.952 (10) |

|                  |           |
|------------------|-----------|
| C(13)-N(4)       | 1.123(6)  |
| C(13)-C(14)      | 1.444(7)  |
| C(14)-H(14A)     | 0.956(10) |
| C(14)-H(14B)     | 0.953(10) |
| F(3)-F(3)#1      | 0.959(12) |
| N(1)-H(1)        | 0.8600    |
| N(3)-Pd          | 1.995(4)  |
| N(4)-Pd          | 2.127(4)  |
| O(2)-Pd          | 1.987(3)  |
|                  |           |
| F(2)-B-F(2)#1    | 103.8(5)  |
| F(2)-B-F(1)      | 109.6(4)  |
| F(2)#1-B-F(1)    | 109.6(4)  |
| F(2)-B-F(3)#1    | 128.8(5)  |
| F(2)#1-B-F(3)#1  | 94.7(4)   |
| F(1)-B-F(3)#1    | 108.1(5)  |
| F(2)-B-F(3)      | 94.7(4)   |
| F(2)#1-B-F(3)    | 128.8(5)  |
| F(1)-B-F(3)      | 108.1(5)  |
| F(3)#1-B-F(3)    | 40.6(5)   |
| O(1)-C(1)-H(1A)  | 100(4)    |
| O(1)-C(1)-H(1B)  | 110(2)    |
| H(1A)-C(1)-H(1B) | 112(3)    |
| O(1)-C(2)-C(3)   | 126.5(4)  |
| O(1)-C(2)-C(7)   | 114.7(4)  |
| C(3)-C(2)-C(7)   | 118.9(4)  |
| C(4)-C(3)-C(2)   | 119.5(5)  |
| C(4)-C(3)-H(3)   | 120.3     |
| C(2)-C(3)-H(3)   | 120.3     |
| C(3)-C(4)-C(5)   | 123.7(4)  |
| C(3)-C(4)-H(4)   | 118.2     |
| C(5)-C(4)-H(4)   | 118.2     |
| C(4)-C(5)-C(6)   | 116.0(4)  |
| C(4)-C(5)-Pd     | 122.1(3)  |
| C(6)-C(5)-Pd     | 121.9(3)  |
| C(7)-C(6)-C(5)   | 121.2(4)  |

|                     |            |
|---------------------|------------|
| C(7)-C(6)-N(1)      | 114.0(4)   |
| C(5)-C(6)-N(1)      | 124.8(4)   |
| C(2)-C(7)-C(6)      | 120.8(4)   |
| C(2)-C(7)-H(7)      | 119.6      |
| C(6)-C(7)-H(7)      | 119.6      |
| O(2)-C(8)-N(1)      | 122.7(4)   |
| O(2)-C(8)-N(2)      | 118.9(4)   |
| N(1)-C(8)-N(2)      | 118.4(4)   |
| N(2)-C(9)-H(9A)     | 100(4)     |
| N(2)-C(9)-H(9B)     | 117(3)     |
| H(9A)-C(9)-H(9B)    | 107.2(15)  |
| N(2)-C(10)-H(10A)   | 110(3)     |
| N(2)-C(10)-H(10B)   | 109.6(19)  |
| H(10A)-C(10)-H(10B) | 107.9(14)  |
| N(3)-C(11)-C(12)    | 177.9(5)   |
| C(11)-C(12)-H(12A)  | 112(3)     |
| C(11)-C(12)-H(12B)  | 113(3)     |
| H(12A)-C(12)-H(12B) | 109.7(15)  |
| N(4)-C(13)-C(14)    | 179.7(5)   |
| C(13)-C(14)-H(14A)  | 111(4)     |
| C(13)-C(14)-H(14B)  | 110(3)     |
| H(14A)-C(14)-H(14B) | 108.9(15)  |
| F(3)#1-F(3)-B       | 69.7(3)    |
| C(8)-N(1)-C(6)      | 128.3(4)   |
| C(8)-N(1)-H(1)      | 115.8      |
| C(6)-N(1)-H(1)      | 115.8      |
| C(8)-N(2)-C(9)      | 122.6(4)   |
| C(8)-N(2)-C(10)     | 121.2(4)   |
| C(9)-N(2)-C(10)     | 116.2(4)   |
| C(11)-N(3)-Pd       | 170.5(4)   |
| C(13)-N(4)-Pd       | 177.4(4)   |
| C(2)-O(1)-C(1)      | 117.4(4)   |
| C(8)-O(2)-Pd        | 130.3(3)   |
| C(5)-Pd-O(2)        | 91.97(15)  |
| C(5)-Pd-N(3)        | 94.16(16)  |
| O(2)-Pd-N(3)        | 173.87(14) |

|              |            |
|--------------|------------|
| C(5)-Pd-N(4) | 178.02(16) |
| O(2)-Pd-N(4) | 86.05(14)  |
| N(3)-Pd-N(4) | 87.82(15)  |

---

Symmetry transformations used to generate equivalent atoms:

#1  $x, -y+3/2, z$



Table 4. Anisotropic displacement parameters ( $\text{Å}^2 \times 10^3$ ) for 1.

The anisotropic displacement factor exponent takes the form:

$$-2 \pi^2 [ h^2 a^{*2} U_{11} + \dots + 2 h k a^* b^* U_{12} ]$$

|        | U11     | U22     | U33    | U23    | U13     | U12    |
|--------|---------|---------|--------|--------|---------|--------|
| B      | 37 (3)  | 72 (5)  | 38 (4) | 0      | -3 (3)  | 0      |
| C (1)  | 33 (3)  | 63 (4)  | 24 (3) | 0      | 2 (2)   | 0      |
| C (2)  | 23 (2)  | 27 (2)  | 25 (2) | 0      | 2 (2)   | 0      |
| C (3)  | 19 (2)  | 39 (2)  | 20 (2) | 0      | -3 (2)  | 0      |
| C (4)  | 22 (2)  | 35 (2)  | 26 (3) | 0      | -8 (2)  | 0      |
| C (5)  | 17 (2)  | 18 (2)  | 23 (2) | 0      | -2 (2)  | 0      |
| C (6)  | 27 (2)  | 23 (2)  | 18 (2) | 0      | -3 (2)  | 0      |
| C (7)  | 19 (2)  | 26 (2)  | 23 (2) | 0      | -6 (2)  | 0      |
| C (8)  | 29 (2)  | 20 (2)  | 26 (2) | 0      | 1 (2)   | 0      |
| C (9)  | 31 (3)  | 85 (5)  | 25 (3) | 0      | -4 (2)  | 0      |
| C (10) | 40 (3)  | 34 (2)  | 29 (3) | 0      | 6 (2)   | 0      |
| C (11) | 17 (2)  | 30 (2)  | 38 (3) | 0      | 1 (2)   | 0      |
| C (12) | 29 (3)  | 37 (3)  | 39 (3) | 0      | -7 (2)  | 0      |
| C (13) | 26 (3)  | 44 (3)  | 28 (3) | 0      | -4 (2)  | 0      |
| C (14) | 21 (3)  | 48 (3)  | 53 (4) | 0      | 8 (2)   | 0      |
| F (1)  | 42 (2)  | 87 (2)  | 33 (2) | 0      | -12 (1) | 0      |
| F (2)  | 159 (3) | 56 (2)  | 72 (2) | -2 (1) | -60 (2) | -8 (2) |
| F (3)  | 39 (3)  | 128 (7) | 53 (3) | -1 (3) | 9 (2)   | 11 (2) |
| N (1)  | 23 (2)  | 28 (2)  | 20 (2) | 0      | -4 (2)  | 0      |
| N (2)  | 30 (2)  | 44 (2)  | 18 (2) | 0      | 2 (2)   | 0      |
| N (3)  | 20 (2)  | 28 (2)  | 39 (2) | 0      | -2 (2)  | 0      |
| N (4)  | 23 (2)  | 34 (2)  | 34 (2) | 0      | -4 (2)  | 0      |
| O (1)  | 20 (2)  | 70 (2)  | 22 (2) | 0      | 2 (1)   | 0      |
| O (2)  | 22 (2)  | 41 (2)  | 24 (2) | 0      | 1 (1)   | 0      |
| Pd     | 18 (1)  | 27 (1)  | 27 (1) | 0      | -1 (1)  | 0      |

Table 5. Hydrogen coordinates ( $\times 10^4$ ) and isotropic displacement parameters ( $\text{\AA}^2 \times 10^3$ ) for 1.

|        | x         | y        | z         | U(eq)   |
|--------|-----------|----------|-----------|---------|
| H(3)   | 10657     | 2500     | -1279     | 31      |
| H(4)   | 9844      | 2500     | -363      | 33      |
| H(7)   | 11327     | 2500     | 2078      | 27      |
| H(1A)  | 12040(30) | 2500     | -1460(60) | 61(19)  |
| H(9A)  | 10690(20) | 2500     | 6814(18)  | 120(40) |
| H(10A) | 9479(11)  | 2500     | 5950(40)  | 53(18)  |
| H(12A) | 8000(7)   | 2500     | -1140(40) | 52(17)  |
| H(14A) | 7410(20)  | 2500     | 3410(50)  | 90(30)  |
| H(1B)  | 11525(14) | 1310(50) | -1790(40) | 38(10)  |
| H(9B)  | 10986(14) | 1350(40) | 5780(30)  | 65(14)  |
| H(10B) | 9836(11)  | 1310(30) | 6860(30)  | 31(9)   |
| H(12B) | 8436(13)  | 1420(50) | -1910(30) | 73(16)  |
| H(14B) | 7640(19)  | 1350(50) | 4540(40)  | 120(20) |
| H(1)   | 10851     | 2500     | 3779      | 28      |

Table 6. Torsion angles [deg] for 1.

---

|                      |            |
|----------------------|------------|
| O(1)-C(2)-C(3)-C(4)  | 180.0      |
| C(7)-C(2)-C(3)-C(4)  | 0.0        |
| C(2)-C(3)-C(4)-C(5)  | 0.0        |
| C(3)-C(4)-C(5)-C(6)  | 0.0        |
| C(3)-C(4)-C(5)-Pd    | 180.0      |
| C(4)-C(5)-C(6)-C(7)  | 0.0        |
| Pd-C(5)-C(6)-C(7)    | 180.0      |
| C(4)-C(5)-C(6)-N(1)  | 180.0      |
| Pd-C(5)-C(6)-N(1)    | 0.0        |
| O(1)-C(2)-C(7)-C(6)  | 180.0      |
| C(3)-C(2)-C(7)-C(6)  | 0.0        |
| C(5)-C(6)-C(7)-C(2)  | 0.0        |
| N(1)-C(6)-C(7)-C(2)  | 180.0      |
| F(2)-B-F(3)-F(3)#1   | -150.7(4)  |
| F(2)#1-B-F(3)-F(3)#1 | -38.8(4)   |
| F(1)-B-F(3)-F(3)#1   | 97.0(2)    |
| O(2)-C(8)-N(1)-C(6)  | 0.0        |
| N(2)-C(8)-N(1)-C(6)  | 180.0      |
| C(7)-C(6)-N(1)-C(8)  | 180.0      |
| C(5)-C(6)-N(1)-C(8)  | 0.0        |
| O(2)-C(8)-N(2)-C(9)  | 180.0      |
| N(1)-C(8)-N(2)-C(9)  | 0.0        |
| O(2)-C(8)-N(2)-C(10) | 0.0        |
| N(1)-C(8)-N(2)-C(10) | 180.0      |
| C(12)-C(11)-N(3)-Pd  | 180.000(3) |
| C(14)-C(13)-N(4)-Pd  | 180.0(3)   |
| C(3)-C(2)-O(1)-C(1)  | 0.0        |
| C(7)-C(2)-O(1)-C(1)  | 180.0      |
| N(1)-C(8)-O(2)-Pd    | 0.0        |
| N(2)-C(8)-O(2)-Pd    | 180.0      |
| C(4)-C(5)-Pd-O(2)    | 180.0      |
| C(6)-C(5)-Pd-O(2)    | 0.0        |

|                       |             |
|-----------------------|-------------|
| C (4)-C (5)-Pd-N (3)  | 0.0         |
| C (6)-C (5)-Pd-N (3)  | 180.0       |
| C (4)-C (5)-Pd-N (4)  | 180.000 (4) |
| C (6)-C (5)-Pd-N (4)  | 0.000 (4)   |
| C (8)-O (2)-Pd-C (5)  | 0.0         |
| C (8)-O (2)-Pd-N (3)  | 180.0       |
| C (8)-O (2)-Pd-N (4)  | 180.0       |
| C (11)-N (3)-Pd-C (5) | 180.0       |
| C (11)-N (3)-Pd-O (2) | 0.000 (1)   |
| C (11)-N (3)-Pd-N (4) | 0.0         |
| C (13)-N (4)-Pd-C (5) | 180.000 (7) |
| C (13)-N (4)-Pd-O (2) | 180.000 (6) |
| C (13)-N (4)-Pd-N (3) | 0.000 (6)   |

---

Symmetry transformations used to generate equivalent atoms:

#1  $x, -y+3/2, z$
